# Supplementary material for: The Reassessed Potential of SARS-CoV-2 Attenuation for COVID-19 Vaccine Development—A Systematic Review
Source: MDPI journal article supplement (doi:10.3390/v14050991), 2022-05-07
Supplement: s1 [file s1]

**Supplementary Figures S1a-S1af:** Sequence alignments of the conserved coronaviral aminoacid sequences with attenuation targets identified in this review.

The WT sequence of the SARS-CoV-2 protein (top) is compared against the sequence of another WT coronavirus(es) (bottom) and the amino acid residues known to be altered in the attenuated non-SARS-CoV-2 virus are indicated. The exact mutation position is presented for both SARS-CoV-2 (top) and other coronaviruses (bottom).

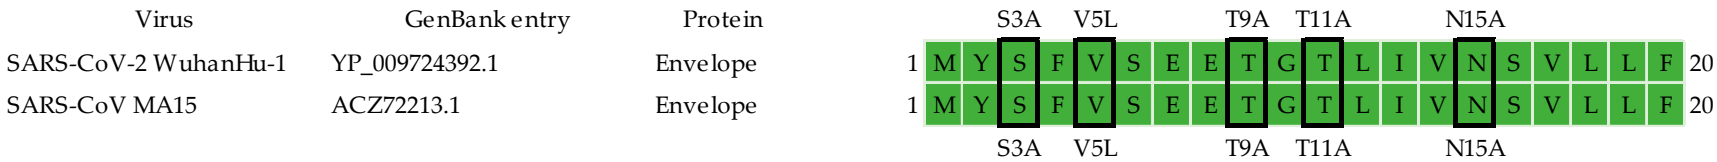

**Figure S1a.** A sequence alignment of the Envelope protein sequences with attenuating mutations indicated – Part 1.

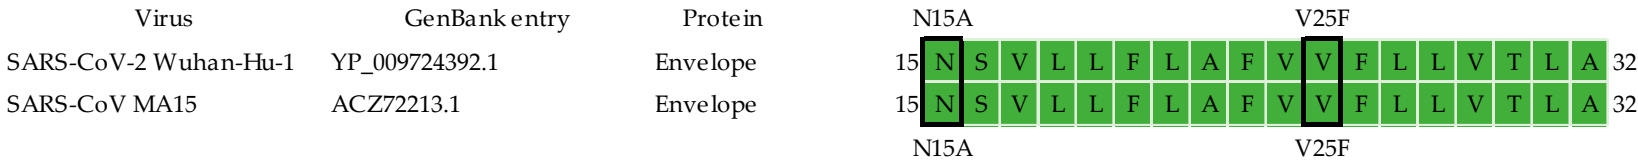

**Figure S1b.** A sequence alignment of the Envelope protein sequences with attenuating mutations indicated – Part 2.

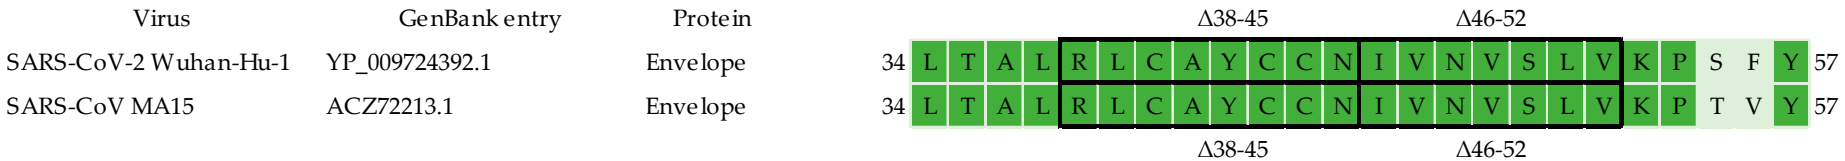

**Figure S1c.** A sequence alignment of the Envelope protein sequences with attenuating mutations indicated – Part 3.

| Virus                 | GenBank entry  | Protein  | DLLV72-75GGGG |   |   |   |   |   |   |   |   |   |   |   |   |   |    |
|-----------------------|----------------|----------|---------------|---|---|---|---|---|---|---|---|---|---|---|---|---|----|
| SARS-CoV-2 Wuhan-Hu-1 | YP_009724392.1 | Envelope | 64            | N | L | N | S | S | R | - | V | P | D | L | L | V | 75 |
| SARS-CoV MA15         | ACZ72213.1     | Envelope | 64            | N | L | N | S | S | E | G | V | P | D | L | L | V | 76 |
|                       |                |          | DLLV73-76GGGG |   |   |   |   |   |   |   |   |   |   |   |   |   |    |

**Figure S1d.** A sequence alignment of the Envelope protein sequences with attenuating mutations indicated – Part 4.

| Virus                 | GenBank entry  | Protein | $\Delta$ 122-130 |   |   |   |   |   |   |   |   |   |   |   |   |   |   |   |     |
|-----------------------|----------------|---------|------------------|---|---|---|---|---|---|---|---|---|---|---|---|---|---|---|-----|
| SARS-CoV-2 Wuhan-Hu-1 | YP_009725297.1 | NSP1    | 120              | V | L | L | R | K | N | G | N | K | G | A | G | G | H | S | 135 |
| SARS-CoV MA15         | FJ882957.1     | NSP1    | 120              | V | L | L | R | K | N | G | N | K | G | A | G | G | H | S | 135 |
|                       |                |         | $\Delta$ 122-130 |   |   |   |   |   |   |   |   |   |   |   |   |   |   |   |     |

**Figure S1e.** A sequence alignment of the NSP1 sequences with attenuating mutations indicated – Part 1.

| Virus                 | GenBank entry  | Protein | R124S K125R/K125E |   |   |   |   |   |   |   |   |   |   |   |   |   |   |   |   |   |     |
|-----------------------|----------------|---------|-------------------|---|---|---|---|---|---|---|---|---|---|---|---|---|---|---|---|---|-----|
| SARS-CoV-2 Wuhan-Hu-1 | YP_009725297.1 | NSP1    | 120               | V | L | L | R | K | N | G | N | K | G | A | - | - | G | G | H | S | 135 |
| MHV-A59               | YP_009915673.1 | NSP1    | 190               | I | L | L | R | K | G | G | N | K | G | S | V | T | S | G | H | F | 206 |
| MHV-JHM.WU            | AFO11514.1     | NSP1    | 190               | I | L | L | R | K | G | G | N | K | G | S | V | T | S | G | H | F | 206 |
|                       |                |         | R193S K194R/K194E |   |   |   |   |   |   |   |   |   |   |   |   |   |   |   |   |   |     |

**Figure S1f.** A sequence alignment of the NSP1 sequences with attenuating mutations indicated – Part 2.

| Virus                 | GenBank entry  | Protein | F480L       |   |   |   |   |   |   |   |   |   |   |   |   |   |   |   |   |   |   |   |   |   |     |
|-----------------------|----------------|---------|-------------|---|---|---|---|---|---|---|---|---|---|---|---|---|---|---|---|---|---|---|---|---|-----|
| SARS-CoV-2 Wuhan-Hu-1 | YP_009725307.1 | NSP12   | 470         | L | F | V | V | E | V | V | D | K | Y | F | D | C | Y | D | G | G | C | I | N | A | 490 |
| SARS-CoV MA15 NanoLuc | ACZ72209.1     | NSP12   | 470         | L | F | V | V | E | V | V | D | K | Y | F | D | C | Y | D | G | G | C | I | N | A | 490 |
| MHV-A59               | YP_009924352.1 | NSP12   | 466         | L | F | V | L | E | V | V | N | K | Y | F | E | I | Y | E | G | G | C | I | P | A | 486 |
|                       |                |         | F480L/F476L |   |   |   |   |   |   |   |   |   |   |   |   |   |   |   |   |   |   |   |   |   |     |

**Figure S1g.** A sequence alignment of the NSP12 sequences with attenuating mutations indicated – Part 1.

| Virus                 | GenBank entry  | Protein | V557L       |   |   |   |   |   |   |   |   |   |   |   |   |   |   |   |   |   |   |   |   |   |     |
|-----------------------|----------------|---------|-------------|---|---|---|---|---|---|---|---|---|---|---|---|---|---|---|---|---|---|---|---|---|-----|
| SARS-CoV-2 Wuhan-Hu-1 | YP_009725307.1 | NSP12   | 547         | A | I | S | A | K | N | R | A | R | T | V | A | G | V | S | I | C | S | T | M | T | 567 |
| SARS-CoV MA15 NanoLuc | ACZ72209.1     | NSP12   | 547         | A | I | S | A | K | N | R | A | R | T | V | A | G | V | S | I | C | S | T | M | T | 567 |
| MHV-A59               | YP_009924352.1 | NSP12   | 543         | A | I | S | A | K | N | R | A | R | T | V | A | G | V | S | I | L | S | T | M | T | 563 |
|                       |                |         | V557L/V553L |   |   |   |   |   |   |   |   |   |   |   |   |   |   |   |   |   |   |   |   |   |     |

**Figure S1h.** A sequence alignment of the NSP12 sequences with attenuating mutations indicated – Part 2.

| Virus                 | GenBank entry  | Protein | A336V |   |   |   |   |   |   |   |   |   |   |   |   |   |   |   |   |   |   |   |   |   |     |
|-----------------------|----------------|---------|-------|---|---|---|---|---|---|---|---|---|---|---|---|---|---|---|---|---|---|---|---|---|-----|
| SARS-CoV-2 Wuhan-Hu-1 | YP_009725307.1 | NSP13   | 325   | P | I | D | K | C | S | R | I | I | P | A | R | A | R | V | E | C | F | D | K | F | 346 |
| MHV-JHM.WU            | AFO11514.1     | NSP13   | 324   | N | I | N | D | C | T | R | I | V | P | A | K | V | R | V | D | C | Y | D | K | F | 345 |
|                       |                |         | A335V |   |   |   |   |   |   |   |   |   |   |   |   |   |   |   |   |   |   |   |   |   |     |

**Figure S1i.** A sequence alignment of the NSP13 sequences with attenuating mutations indicated.

| Virus                 | GenBank entry  | Protein | D331A |   |   |   |   |   |   |   |   |   |   |   |   |   |   |   |   |   |   |   |   |   |     |
|-----------------------|----------------|---------|-------|---|---|---|---|---|---|---|---|---|---|---|---|---|---|---|---|---|---|---|---|---|-----|
| SARS-CoV-2 Wuhan-Hu-1 | YP_009725309.1 | NSP14   | 321   | L | L | A | D | K | F | P | V | L | H | D | I | G | N | P | K | A | I | K | C | V | 341 |
| MHV-A59               | YP_009924354.1 | NSP14   | 320   | M | L | C | N | R | Y | D | V | C | Y | D | I | G | N | P | K | G | L | A | C | V | 340 |
|                       |                |         | D330A |   |   |   |   |   |   |   |   |   |   |   |   |   |   |   |   |   |   |   |   |   |     |

**Figure S1j.** A sequence alignment of the NSP14 sequences with attenuating mutations indicated – Part 1.

| Virus                 | GenBank entry  | Protein | N386A |   |   |   |   |   |   |   |   |   |   |   |   |   |   |   |   |   | V398L |   |   |   |   |   |   |   |   |     |
|-----------------------|----------------|---------|-------|---|---|---|---|---|---|---|---|---|---|---|---|---|---|---|---|---|-------|---|---|---|---|---|---|---|---|-----|
| SARS-CoV-2 Wuhan-Hu-1 | YP_009725309.1 | NSP14   | 380   | G | V | C | L | F | W | N | C | N | V | D | R | Y | P | A | N | S | I     | V | C | R | F | D | T | R | V | 405 |
| MHV-A59               | YP_009924354.1 | NSP14   | 374   | G | L | C | M | F | W | N | C | N | V | D | K | Y | P | A | N | A | V     | V | C | R | F | D | T | R | V | 399 |
| M41R-nsp10.14rep      | AAW33784.1     | NSP14   | 375   | G | L | C | M | F | W | N | C | N | V | D | C | Y | P | D | N | S | L     | V | C | R | Y | D | T | R | N | 400 |
|                       |                |         | N380A |   |   |   |   |   |   |   |   |   |   |   |   |   |   |   |   |   | V393L |   |   |   |   |   |   |   |   |     |

**Figure S1k.** A sequence alignment of the NSP14 sequences with attenuating mutations indicated – Part 2.

| Virus                 | GenBank entry  | Protein | Y420H/Y420A |   |   |   |   |   |   |   |   |   |   |   |   |   |   |   |   |   |   |   |   |   |     |
|-----------------------|----------------|---------|-------------|---|---|---|---|---|---|---|---|---|---|---|---|---|---|---|---|---|---|---|---|---|-----|
| SARS-CoV-2 Wuhan-Hu-1 | YP_009725309.1 | NSP14   | 410         | N | L | P | G | C | N | G | G | S | L | Y | V | N | K | H | A | F | H | T | S | P | 430 |
| MHV-A59               | YP_009924354.1 | NSP14   | 404         | N | L | P | G | C | D | G | G | S | L | Y | V | N | K | H | A | F | H | T | P | A | 424 |
|                       |                |         | Y414H/Y414A |   |   |   |   |   |   |   |   |   |   |   |   |   |   |   |   |   |   |   |   |   |     |

**Figure S1l.** A sequence alignment of the NSP14 sequences with attenuating mutations indicated – Part 3.

| Virus                 | GenBank entry  | Protein | H234A |                   |   |   |   |   |   |   |   |   |   |   | H249A |                   |   |   |   |   |   |   |   |   |   |   |   |   |   |     |
|-----------------------|----------------|---------|-------|-------------------|---|---|---|---|---|---|---|---|---|---|-------|-------------------|---|---|---|---|---|---|---|---|---|---|---|---|---|-----|
| SARS-CoV-2 Wuhan-Hu-1 | YP_009725310.1 | NSP15   | 230   | Y                 | A | F | E | H | I | V | Y | G | D | F | S     | H                 | S | Q | L | G | G | L | H | L | L | I | G | L | A | 255 |
| MHV-A59               | AAX23975.1     | NSP15   | 258   | Y                 | A | F | E | H | V | V | Y | G | S | F | N     | Q                 | K | I | I | G | G | L | H | L | L | I | G | L | A | 283 |
| IBV strain YN         | QQL06463.1     | NSP15   | 219   | L                 | G | L | Q | H | I | L | Y | G | E | V | E     | K                 | P | Q | L | G | G | L | H | T | V | I | G | M | Y | 244 |
| PEDV strain Colorado  | AGO58929.1     | NSP15   | 217   | Y                 | G | F | E | H | V | V | Y | G | D | V | S     | K                 | T | T | L | G | G | L | H | L | L | I | S | Q | V | 247 |
| HCoV-229E             | AAG48591.1     | NSP15   | 231   | F                 | N | F | E | H | V | V | Y | G | D | V | S     | K                 | T | T | L | G | G | L | H | L | L | I | S | Q | V | 256 |
|                       |                |         |       | H262A/H238A/H226A |   |   |   |   |   |   |   |   |   |   |       | H277A/H238A/H250A |   |   |   |   |   |   |   |   |   |   |   |   |   |     |

**Figure S1m.** A sequence alignment of the NSP15 sequences with attenuating mutations indicated – Part 1.

| Virus                 | GenBank entry  | Protein | K289A |       |   |   |   |   |   |   |   |   |   |   |   |   |   |   |   |   |   |   |   |   |     |
|-----------------------|----------------|---------|-------|-------|---|---|---|---|---|---|---|---|---|---|---|---|---|---|---|---|---|---|---|---|-----|
| SARS-CoV-2 Wuhan-Hu-1 | YP_009725310.1 | NSP15   | 279   | F     | I | T | D | A | Q | T | G | S | S | K | C | V | C | S | V | I | D | L | L | L | 299 |
| IBV strain YN         | QQL06463.1     | NSP15   | 269   | F     | V | L | - | A | D | N | G | S | Y | K | Q | V | C | T | V | V | D | L | L | L | 288 |
|                       |                |         |       | K278A |   |   |   |   |   |   |   |   |   |   |   |   |   |   |   |   |   |   |   |   |     |

**Figure S1n.** A sequence alignment of the NSP15 sequences with attenuating mutations indicated – Part 2.

| Virus                 | GenBank entry  | Protein | Y342A |   |   |   |   |   |   |   |   |   |   |   |   |   |   |   |     |
|-----------------------|----------------|---------|-------|---|---|---|---|---|---|---|---|---|---|---|---|---|---|---|-----|
| SARS-CoV-2 Wuhan-Hu-1 | YP_009725310.1 | NSP15   | 332   | W | C | K | D | G | H | V | E | T | F | Y | P | K | L | Q | 346 |
| IBV strain YN         | QQL06463.1     | NSP15   | 324   | W | F | E | D | G | S | I | K | T | C | Y | P | Q | L | Q | 338 |
|                       |                |         | Y334A |   |   |   |   |   |   |   |   |   |   |   |   |   |   |   |     |

**Figure S1o.** A sequence alignment of the NSP15 sequences with attenuating mutations indicated – Part 3.

| Virus                 | GenBank entry  | Protein | Y15A |   |   |   |   |   |   |   |   |   |   |   |   |   |   |   |   |   |   |   |   |   |    |
|-----------------------|----------------|---------|------|---|---|---|---|---|---|---|---|---|---|---|---|---|---|---|---|---|---|---|---|---|----|
| SARS-CoV-2 Wuhan-Hu-1 | YP_009725311.1 | NSP16   | 5    | W | Q | P | G | V | A | M | P | N | L | Y | K | M | Q | R | M | L | L | E | K | C | 25 |
| MHV-A59               | YP_009924356.1 | NSP16   | 5    | W | K | P | G | Y | V | M | P | V | L | Y | K | Y | L | E | S | P | L | E | R | V | 25 |
|                       |                |         | Y15A |   |   |   |   |   |   |   |   |   |   |   |   |   |   |   |   |   |   |   |   |   |    |

**Figure S1p.** A sequence alignment of the NSP16 sequences with attenuating mutations indicated – Part 1.

| Virus                 | GenBank entry  | Protein | D130A       |   |   |   |   |   |   |   |   |   |   |   |   |   |   |   |   |   |   |   |   |   |     |
|-----------------------|----------------|---------|-------------|---|---|---|---|---|---|---|---|---|---|---|---|---|---|---|---|---|---|---|---|---|-----|
| SARS-CoV-2 Wuhan-Hu-1 | YP_009725311.1 | NSP16   | 120         | T | A | N | K | W | D | L | I | I | S | D | M | Y | D | P | K | T | K | N | V | T | 140 |
| SARS-CoV Urbani       | AAP13442.1     | NSP16   | 120         | T | A | N | K | W | D | L | I | I | S | D | M | Y | D | P | R | T | K | H | V | T | 140 |
| SARS-CoV MA15         | ACZ72209.1     | NSP16   | 120         | T | A | N | K | W | D | L | I | I | S | D | M | Y | D | P | R | T | K | H | V | T | 140 |
| HCoV-229E             | AAG48591.1     | NSP16   | 119         | L | E | D | K | F | D | L | L | I | S | D | M | Y | D | G | R | T | K | A | I | D | 139 |
| PEDV icPC22A          | ARM65495.1     | NSP16   | 119         | L | S | D | K | F | D | L | V | I | S | D | M | Y | D | G | K | I | K | S | C | D | 139 |
| MERS-CoV EMC          | YP_009047227.1 | NSP16   | 120         | V | G | Q | Q | V | D | L | V | I | S | D | M | Y | D | P | T | T | K | N | V | T | 140 |
| MERS-CoV MA1          | JX869059.2     | NSP16   | 120         | V | G | Q | Q | V | D | L | V | I | S | D | M | Y | D | P | T | T | K | N | V | T | 140 |
|                       |                |         | D130A/D129A |   |   |   |   |   |   |   |   |   |   |   |   |   |   |   |   |   |   |   |   |   |     |

**Figure S1r.** A sequence alignment of the NSP16 sequences with attenuating mutations indicated – Part 2.

| Virus                 | GenBank entry  | Protein | K170A       |   |   |   |   |   |   |   |   |   |   |   |   |   |   |   |   |   |   |   |   |   |     |
|-----------------------|----------------|---------|-------------|---|---|---|---|---|---|---|---|---|---|---|---|---|---|---|---|---|---|---|---|---|-----|
| SARS-CoV-2 Wuhan-Hu-1 | YP_009725311.1 | NSP16   | 160         | K | L | A | L | G | G | S | V | A | I | K | I | T | E | H | S | W | N | A | D | L | 180 |
| SARS-CoV Urbani       | AAP13442.1     | NSP16   | 160         | K | L | A | L | G | G | S | I | A | V | K | I | T | E | H | S | W | N | A | D | L | 180 |
| PEDV icPC22A          | ARM65495.1     | NSP16   | 159         | K | L | A | L | G | G | T | V | A | I | K | V | T | E | F | S | W | N | K | K | L | 179 |
|                       |                |         | K170A/K169A |   |   |   |   |   |   |   |   |   |   |   |   |   |   |   |   |   |   |   |   |   |     |

**Figure S1s.** A sequence alignment of the NSP16 sequences with attenuating mutations indicated – Part 3.

| Virus                 | GenBank entry  | Protein | K46A      |   |   |   |   |   |   |   |   |   |   |   |   |   |   |   |   |   |   |   |   |   |    |
|-----------------------|----------------|---------|-----------|---|---|---|---|---|---|---|---|---|---|---|---|---|---|---|---|---|---|---|---|---|----|
| SARS-CoV-2 Wuhan-Hu-1 | YP_009725311.1 | NSP16   | 36        | L | P | K | G | I | M | M | N | V | A | K | Y | T | Q | L | C | Q | Y | L | N | T | 56 |
| SARS-CoV Urbani       | AAP13442.1     | NSP16   | 36        | I | P | K | G | I | M | M | N | V | A | K | Y | T | Q | L | C | Q | Y | L | N | T | 56 |
| PEDV icPC22A          | ARM65495.1     | NSP16   | 35        | L | P | D | G | I | M | F | N | V | V | K | Y | T | Q | L | C | Q | Y | L | N | S | 55 |
|                       |                |         | K46A/K45A |   |   |   |   |   |   |   |   |   |   |   |   |   |   |   |   |   |   |   |   |   |    |

**Figure S1t.** A sequence alignment of the NSP16 sequences with attenuating mutations indicated – Part 4.

| Virus                 | GenBank entry  | Protein | E203A |   |   |   |   |   |   |   |   |   |   |   |   |   |   |   |   |   |   |   |   |   |     |
|-----------------------|----------------|---------|-------|---|---|---|---|---|---|---|---|---|---|---|---|---|---|---|---|---|---|---|---|---|-----|
| SARS-CoV-2 Wuhan-Hu-1 | YP_009725311.1 | NSP16   | 193   | F | V | T | N | V | N | A | S | S | S | E | A | F | L | I | G | C | N | Y | L | G | 213 |
| PEDV icPC22A          | ARM65495.1     | NSP16   | 192   | F | C | T | S | V | N | T | S | S | S | E | A | F | L | I | G | V | H | Y | L | G | 212 |
|                       |                |         | E202A |   |   |   |   |   |   |   |   |   |   |   |   |   |   |   |   |   |   |   |   |   |     |

**Figure S1u.** A sequence alignment of the NSP16 sequences with attenuating mutations indicated – Part 5.

| Virus                         | GenBank entry  | Protein | D226A       |   |   |   |   |   |   |   |   |   |   |   |   |   |   |   |   |   |   |   |   |   |     |
|-------------------------------|----------------|---------|-------------|---|---|---|---|---|---|---|---|---|---|---|---|---|---|---|---|---|---|---|---|---|-----|
| SARS-CoV-2 Wuhan-Hu-1         | YP_009725299.1 | NSP3    | 216         | L | T | D | N | V | Y | I | K | N | A | D | I | V | E | E | A | K | K | V | K | P | 236 |
| SARS-CoV MA15                 | ACZ72208.1     | NSP3    | 194         | L | T | D | N | V | A | I | K | C | V | D | I | V | K | E | A | Q | S | A | N | P | 214 |
| rJIA-GFP <sub>rev</sub> N1347 | YP_209246.1    | NSP3    | 487         | I | T | P | N | V | C | F | V | K | G | D | V | I | K | V | L | R | R | V | G | A | 507 |
|                               |                |         | D204A/D497A |   |   |   |   |   |   |   |   |   |   |   |   |   |   |   |   |   |   |   |   |   |     |

**Figure S1v.** A sequence alignment of the NSP3 sequences with attenuating mutations indicated – Part 1.

| Virus                          | GenBank entry  | Protein | N244A             |   |   |   |   |   |   |   |   |   |   |   |   |   |   |   | H249A |   |   |   |   |   |   |   |   |   |   |     |
|--------------------------------|----------------|---------|-------------------|---|---|---|---|---|---|---|---|---|---|---|---|---|---|---|-------|---|---|---|---|---|---|---|---|---|---|-----|
| SARS-CoV-2 Wuhan-Hu-1          | YP_009725299.1 | NSP3    | 234               | V | K | P | T | V | V | V | N | A | A | N | V | Y | L | K | H     | G | G | G | V | A | G | A | L | N | K | 259 |
| SARS-CoV MA15                  | ACZ72208.1     | NSP3    | 212               | A | N | P | M | V | I | V | N | A | A | N | I | H | L | K | H     | G | G | G | V | A | G | A | L | N | K | 237 |
| rJIA-GFP <sub>prev</sub> N1347 | YP_209246.1    | NSP3    | 505               | V | G | A | E | V | I | V | N | P | A | N | G | R | M | A | H     | G | A | G | V | A | G | A | I | A | K | 530 |
| MHV-A59                        | AAX23975.1     | NSP3    | 506               | V | N | A | E | V | I | V | N | P | A | N | G | R | M | A | H     | G | A | G | V | A | G | A | I | A | E | 531 |
|                                |                |         | N222A/N515A/N516A |   |   |   |   |   |   |   |   |   |   |   |   |   |   |   | H227A |   |   |   |   |   |   |   |   |   |   |     |

**Figure S1w.** A sequence alignment of the NSP3 sequences with attenuating mutations indicated – Part 2.

| Virus                 | GenBank entry  | Protein | A333G G334V       |   |   |   |   |   |   |   |   |   |   |   |   |   |   |   |   |   |   |   |   |   |   |     |  |  |  |
|-----------------------|----------------|---------|-------------------|---|---|---|---|---|---|---|---|---|---|---|---|---|---|---|---|---|---|---|---|---|---|-----|--|--|--|
| SARS-CoV-2 Wuhan-Hu-1 | YP_009725299.1 | NSP3    | 323               | H | E | V | L | L | A | P | L | L | S | A | G | I | F | G | A | D | P | I | H | S | L | 344 |  |  |  |
| SARS-CoV MA15         | ACZ72208.1     | NSP3    | 301               | Q | D | I | L | L | A | P | L | L | S | A | G | I | F | G | A | K | P | L | Q | S | L | 322 |  |  |  |
| rJIA-GFPprevN1347     | YP_209246.1    | NSP3    | 596               | C | D | N | V | V | T | T | L | I | S | A | G | I | F | S | V | P | T | D | V | S | L | 617 |  |  |  |
|                       |                |         | A606G G312V/G607V |   |   |   |   |   |   |   |   |   |   |   |   |   |   |   |   |   |   |   |   |   |   |     |  |  |  |

**Figure S1x.** A sequence alignment of the NSP3 sequences with attenuating mutations indicated – Part 3.

| Virus                 | GenBank entry  | Protein | S40A |   |   |   |   |   |   |   |   |   |   |   |   |   |   |   |   |   |   |   |   |   |  |    |  |  |  |
|-----------------------|----------------|---------|------|---|---|---|---|---|---|---|---|---|---|---|---|---|---|---|---|---|---|---|---|---|--|----|--|--|--|
| SARS-CoV-2 Wuhan-Hu-1 | YP_009724391.1 | ORF3a   | 1    | R | A | T | A | T | I | P | I | Q | A | S | L | P | F | G | W | L | I | V | G | V |  | 32 |  |  |  |
| SARS-CoV MA15         | ACZ72211.1     | ORF3a   | 1    | H | A | T | A | T | I | P | L | Q | A | S | L | P | F | G | W | L | V | I | G | V |  | 32 |  |  |  |
|                       |                |         | S40A |   |   |   |   |   |   |   |   |   |   |   |   |   |   |   |   |   |   |   |   |   |  |    |  |  |  |

**Figure S1y.** A sequence alignment of the ORF3a protein sequences with attenuating mutations indicated – Part 1.



| Virus                 | GenBank entry  | Protein | S58A |   |   |   |   |   |   |   |   |   |   |   |   |   |   |   |   |   |   |   |   |   |    |
|-----------------------|----------------|---------|------|---|---|---|---|---|---|---|---|---|---|---|---|---|---|---|---|---|---|---|---|---|----|
| SARS-CoV-2 Wuhan-Hu-1 | YP_009724391.1 | ORF3a   | 48   | I | G | V | A | F | L | A | V | F | Q | S | A | T | K | I | I | A | L | N | K | R | 68 |
| SARS-CoV MA15         | ACZ72211.1     | ORF3a   | 48   | V | G | V | A | L | L | A | V | F | Q | S | A | S | K | I | I | T | L | K | K | R | 68 |

**Figure S1z.** A sequence alignment of the ORF3a protein sequences with attenuating mutations indicated – Part 2.

| Virus                 | GenBank entry  | Protein | Y109A Y113A Q116A |   |   |   |   |   |   |   |   |   |   |   |   |   |   |   |   |   |   |     |
|-----------------------|----------------|---------|-------------------|---|---|---|---|---|---|---|---|---|---|---|---|---|---|---|---|---|---|-----|
| SARS-CoV-2 Wuhan-Hu-1 | YP_009724391.1 | ORF3a   | 104               | P | F | L | Y | L | Y | A | L | V | Y | F | L | Q | S | I | N | F | V | 121 |
| SARS-CoV MA15         | ACZ72211.1     | ORF3a   | 104               | Q | F | L | Y | L | Y | A | L | I | Y | F | L | Q | C | I | N | A | C | 121 |

**Figure S1aa.** A sequence alignment of the ORF3a protein sequences with attenuating mutations indicated – Part 3.

| Virus                 | GenBank entry  | Protein | SVPL272-275GMSM |   |   |   |   |   |   |   |   |   |   |   |   |   |   |     |
|-----------------------|----------------|---------|-----------------|---|---|---|---|---|---|---|---|---|---|---|---|---|---|-----|
| SARS-CoV-2 Wuhan-Hu-1 | YP_009724391.1 | ORF3a   | 262             | P | I | Y | D | E | P | T | T | T | T | S | V | P | L | 275 |
| SARS-CoV MA15         | ACZ72211.1     | ORF3a   | 261             | P | I | Y | D | E | P | T | T | T | T | S | V | P | L | 274 |

**Figure S1ab.** A sequence alignment of the ORF3a protein sequences with attenuating mutations indicated – Part 3.

| Virus                 | GenBank entry  | Protein | T345I |       |   |   |   |   |   |   |   |   |   |   |   |   |   |   |   |   |   |   |   |   |     |
|-----------------------|----------------|---------|-------|-------|---|---|---|---|---|---|---|---|---|---|---|---|---|---|---|---|---|---|---|---|-----|
| SARS-CoV-2 Wuhan-Hu-1 | YP_009724390.1 | Spike   | 335   | L     | C | P | F | G | E | V | F | N | A | T | R | F | A | S | V | Y | A | W | N | R | 355 |
| SARS-CoV Urbani       | AAP13441.1     | Spike   | 332   | L     | C | P | F | G | E | V | F | N | A | T | K | F | P | S | V | Y | A | W | E | R | 342 |
|                       |                |         |       | T332I |   |   |   |   |   |   |   |   |   |   |   |   |   |   |   |   |   |   |   |   |     |

**Figure S1ac.** A sequence alignment of the Spike protein sequences with attenuating mutations indicated – Part 1.

| Virus                 | GenBank entry  | Protein | Q965H                                                      |
|-----------------------|----------------|---------|------------------------------------------------------------|
| SARS-CoV-2 Wuhan-Hu-1 | YP_009724390.1 | Spike   | 955 N A Q A L N T L V K <b>Q</b> L S S N F G A I S S 975   |
| SJHM-RA59/S4R29       | YP_209233.1    | Spike   | 1057 N A E A L N N L L N <b>Q</b> L S N R F G A I S A 1077 |
|                       |                |         | Q1067H                                                     |

**Figure S1ad.** A sequence alignment of the Spike protein sequences with attenuating mutations indicated – Part 2.

| Virus                 | GenBank entry  | Protein | Q992H                                                      |
|-----------------------|----------------|---------|------------------------------------------------------------|
| SARS-CoV-2 Wuhan-Hu-1 | YP_009724390.1 | Spike   | 982 S R L D K V E A E V <b>Q</b> I D R L I T G R L Q 1002  |
| SJHM-RA59/S4R29       | YP_209233.1    | Spike   | 1084 T R L D A V E A K A <b>Q</b> I D R L I N G R L T 1104 |
|                       |                |         | Q1094H                                                     |

**Figure S1ae.** A sequence alignment of the Spike protein sequences with attenuating mutations indicated – Part 3.

| Virus                 | GenBank entry  | Protein |      | L1012R                                         |
|-----------------------|----------------|---------|------|------------------------------------------------|
| SARS-CoV-2 Wuhan-Hu-1 | YP_009724390.1 | Spike   | 982  | Q S L Q T Y V T Q Q L I R A A E I R A S A 1002 |
| SJHM-RA59/S4R29       | YP_209233.1    | Spike   | 1084 | T A L N A Y I S K Q L S D S T L I K F S A 1104 |
|                       |                |         |      | L1114R                                         |

**Figure S1af.** A sequence alignment of the Spike protein sequences with attenuating mutations indicated – Part 4.
