# Supplementary material for: The Reassessed Potential of SARS-CoV-2 Attenuation for COVID-19 Vaccine Development—A Systematic Review
Source: MDPI journal article supplement (doi:10.3390/v14050991), 2022-05-07
Supplement: s1 [file s1]

PRISMA 2020 flow diagram for new systematic reviews which included searches of databases, registers and other sources

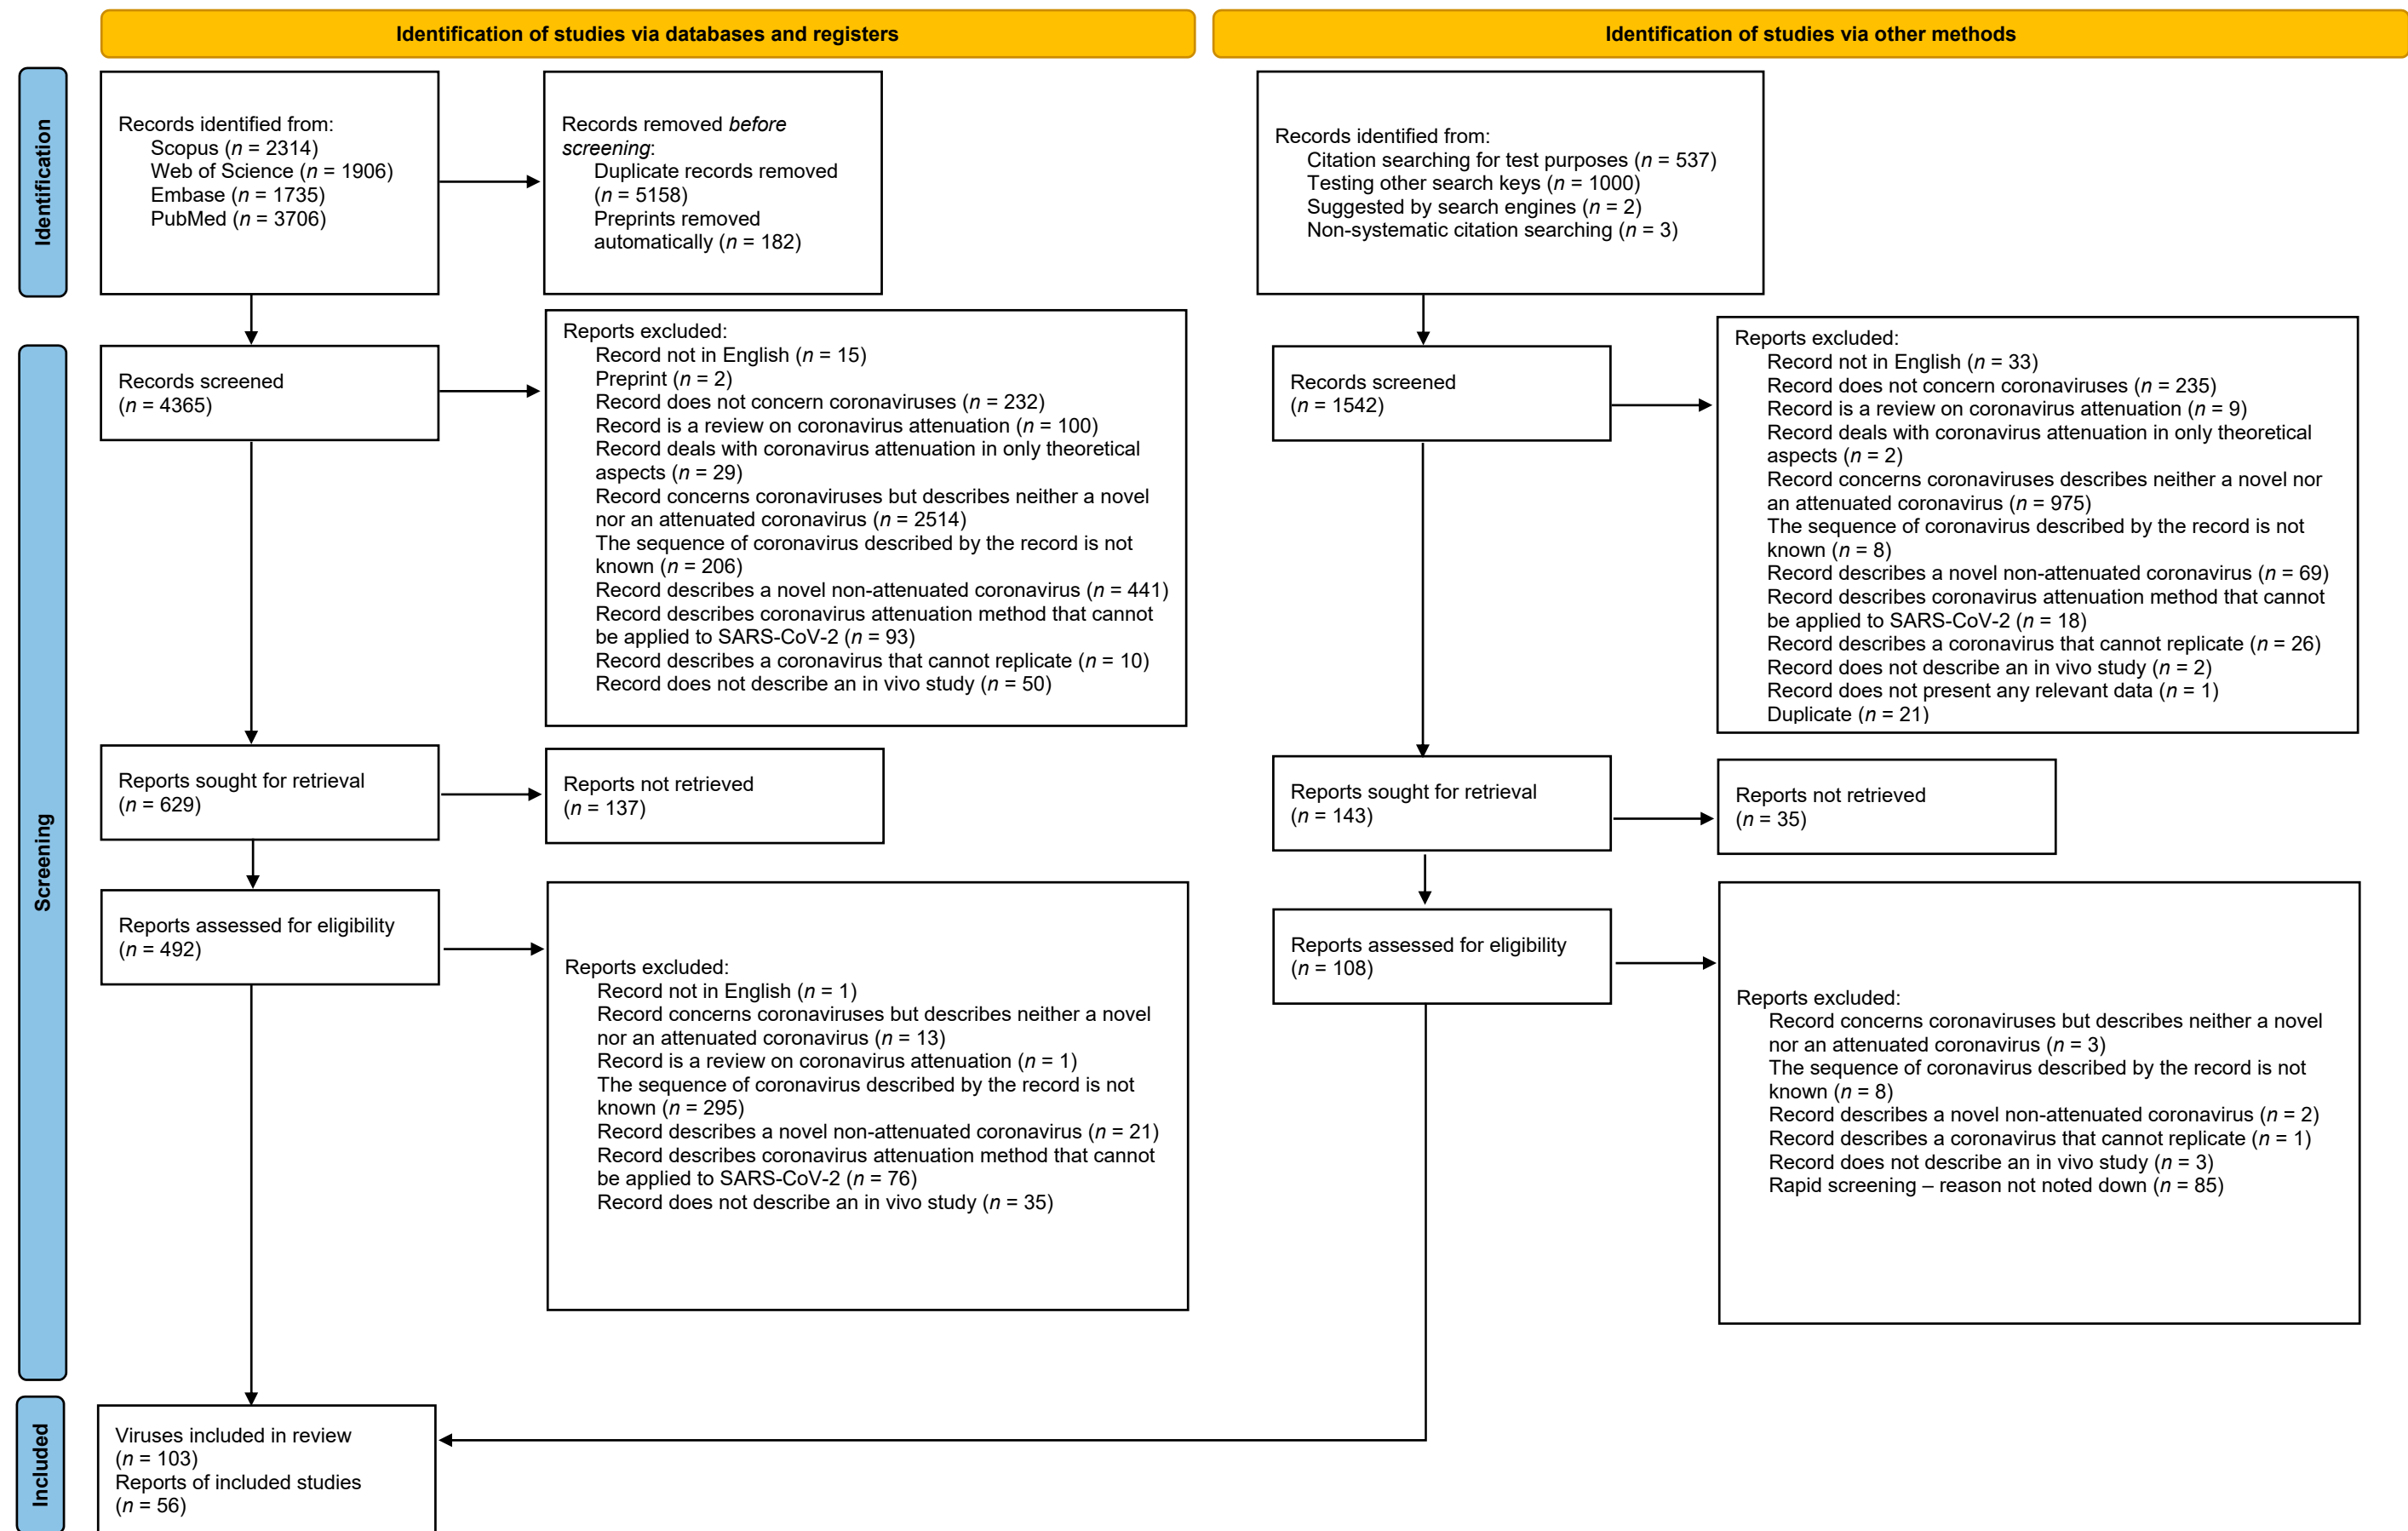

Figure S2. PRISMA 2020 flow diagram of studies.

\*Consider, if feasible to do so, reporting the number of records identified from each database or register searched (rather than the total number across all databases/registers).

\*\*If automation tools were used, indicate how many records were excluded by a human and how many were excluded by automation tools.
