# Supplementary material for: The Reassessed Potential of SARS-CoV-2 Attenuation for COVID-19 Vaccine Development—A Systematic Review
Source: MDPI journal article supplement (doi:10.3390/v14050991), 2022-05-07
Supplement: s1 [file s1]

# **The reassessed potential of SARS-CoV-2 attenuation for COVID-19 vaccine development - a systematic review**

Marcin Goławski, Piotr Lewandowski, Iwona Jabłońska and Marcin Delijewski

**Supplementary Material; Tables S2a-S2e**

**Table S2a.** A complete list of viruses included in this review.

| Parental strain | Known as                                                                                | Mutations                                                                                                                                                                                                                                                                                                                                                                                                                                           | Corresponding mutations in SARS-CoV-2 | Origins             | Reference |
|-----------------|-----------------------------------------------------------------------------------------|-----------------------------------------------------------------------------------------------------------------------------------------------------------------------------------------------------------------------------------------------------------------------------------------------------------------------------------------------------------------------------------------------------------------------------------------------------|---------------------------------------|---------------------|-----------|
| SARS-CoV-2      | strain TY38-873 (Omicron) Lineage BA.1                                                  | NSP3: K38R P985L T1004I SL1265–1266I A1892T NSP4 T492I<br>NSP5 P132Y<br>NSP6: Δ105–107 I189V NSP12 P303L NSP14 I42V<br>Spike: A67V Δ69–70 T95I G142D Δ143-145 NL211–212I RD214–215EPE G339D S371L S373P S375F K417N N440K G446S S477N T478K E484A Q493R G496S Q498R N501Y Y505H T547K D614G H655Y N679K P681H N764K D796Y N856K Q954H N969K L981F<br>Envelope T9I<br>Membrane: D3G Q19E A63T<br>Nucleocapsid: P13L Δ31–33 RG203–204KR<br>ORF10 V30L | -                                     | Naturally occurring | [1]       |
| SARS-CoV-2      | Omicron variant, strain B.1.1.529, isolate hCoV-19/USA/WI-WSLH-221686/2021 Lineage BA.1 | NSP3: K38R SL1265–1266I A1892T NSP4 T492I NSP5 P132H<br>NSP6 Δ106-108<br>NSP12 P323L<br>NSP14 I42V<br>NSP16 L126F<br>Spike: A67V Δ69–70 T95I G142D Δ143-145 NL211–212I 214EPE insertion G339D S371F S373P S375F K417N N440K G446S S477N T478K E484A Q493R G496R Q498R N501Y Y505H T547K D614G H655Y N679K P681H D796Y N856K Q954H N969K                                                                                                             | -                                     | Naturally occurring | [2]       |

|            |                                                                                                                                                 |                                                                                                                                                                                                                                                                                                                                                                                                                                                   |   |                     |     |
|------------|-------------------------------------------------------------------------------------------------------------------------------------------------|---------------------------------------------------------------------------------------------------------------------------------------------------------------------------------------------------------------------------------------------------------------------------------------------------------------------------------------------------------------------------------------------------------------------------------------------------|---|---------------------|-----|
|            |                                                                                                                                                 | L981F Envelope: T9I<br>Membrane: D3G Q19E A63T<br>Nucleocapsid: P13L Δ31–33 RG203–204KR                                                                                                                                                                                                                                                                                                                                                           |   |                     |     |
| SARS-CoV-2 | hCoV-19/USA/NY-MSHSPSP-PV44476/2021<br>Lineage BA.1                                                                                             | NSP3: K38R SL1265–1266I A1892T<br>NSP4 T492I NSP5 P132H NSP6<br>Δ106–108<br>NSP12 P323L<br>NSP14 I42V<br>Spike: A67V Δ69–70 T95I G142D<br>Δ143–145 NL211–212I 214EPE<br>insertion G339D S371F S373P S375F<br>K417N N440K G446S S477N T478K<br>E484A Q493R G496R Q498R N501Y<br>Y505H T547K D614G H655Y N679K<br>P681H A701V D796Y N856K Q954H<br>N969K L981F<br>Envelope: T9I<br>Membrane: D3G Q19E A63T<br>Nucleocapsid: P13L Δ31–33 RG203–204KR | - | Naturally occurring | [2] |
| SARS-CoV-2 | Omicron variant, lineage BA.1, isolates:<br>hCoV-19/USA/NY-MSHSPSP-PV44488/2021<br>hCoV-19/USA/GA-EHC-2811C/2021<br>hCoV-19/Japan/NC928-2N/2021 | NSP3: K38R SL1265–1266I A1892T<br>NSP4 T492I<br>NSP5 P132H<br>NSP6 Δ106–108<br>NSP12 P323L<br>NSP14 I42V<br>Spike: A67V Δ69–70 T95I G142D<br>Δ143–145 NL211–212I 214EPE<br>insertion G339D S371F S373P S375F<br>K417N N440K G446S S477N T478K<br>E484A Q493R G496R Q498R N501Y<br>Y505H T547K D614G H655Y N679K                                                                                                                                   | - | Naturally occurring | [2] |

|            |                                                                                                       |                                                                                                                                                                                                                                                                                                                                                                                                                                                        |   |                        |     |
|------------|-------------------------------------------------------------------------------------------------------|--------------------------------------------------------------------------------------------------------------------------------------------------------------------------------------------------------------------------------------------------------------------------------------------------------------------------------------------------------------------------------------------------------------------------------------------------------|---|------------------------|-----|
|            |                                                                                                       | P681H D796Y N856K Q954H N969K<br>L981F Envelope: T9I<br>Membrane: D3G Q19E A63T<br>Nucleocapsid: P13L Δ31–33 RG203-<br>204KR                                                                                                                                                                                                                                                                                                                           |   |                        |     |
| SARS-CoV-2 | B.1.1.529/Omicron (R346K)<br>(GenBank:<br>OM212473)<br>Lineage BA.1.1                                 | NSP3: K38R SL1265-1266I A1892T<br>NSP4 T492I NSP5 P132H NSP6:<br>Δ105–107 I189V NSP12 P323L<br>NSP14 I42V Spike: A67V Δ69–70<br>T95I G142D Δ143-145 NL211-212I<br>214EPE insertion G339 R346K S371L<br>S373P S375F K417N N440K G446S<br>S477N T478K E484A Q493R G496S<br>Q498R N501Y Y505H T547K D614G<br>H655Y N679K P681H N764K D796Y<br>N856K Q954H N969K L981F<br>Envelope T9I Membrane: D3G Q19E<br>A63T Nucleocapsid: P13L Δ31-33<br>R203K G204R | - | Naturally<br>occurring | [3] |
| SARS-CoV-2 | B.1.1.529/Omicron (GenBank:<br>OM212472)<br>SARS-CoV-<br>2/human/HKG/HKU-<br>691/2021<br>Lineage BA.1 | NSP3: K38R SL1265-1266I A1892T<br>NSP4 T492I<br>NSP5 P132H<br>NSP6: Δ105-107 I189V<br>NSP12 P323L<br>NSP14 I42V<br>Spike: A67V Δ69–70 T95I G142D<br>Δ143-145 NL211-212I 214EPE<br>insertion G339D S371L S373P S375F<br>K417N N440K G446S S477N T478K<br>E484A Q493R G496S Q498R N501Y<br>Y505H T547K D614G H655Y N679K<br>P681H N764K D796Y N856K Q954H<br>N969K L981F                                                                                 | - | Naturally<br>occurring | [3] |

|                                             |                    |                                                                                                        |   |                                 |       |
|---------------------------------------------|--------------------|--------------------------------------------------------------------------------------------------------|---|---------------------------------|-------|
|                                             |                    | Envelope T9I<br>Membrane: D3G Q19E A63T<br>Nucleocapsid: P13L Δ31–33 R203K<br>G204R                    |   |                                 |       |
|                                             |                    | Relative to AP66:<br>NSP3: P74S S370L<br>S protein: K74N I95T<br>N protein: R203K G204R                |   |                                 |       |
| SARS-CoV-2                                  | SARS-CoV2 GZ69     | Relative to WuhanHu-1:<br>NSP3: P74S S370L<br>NSP12 P323L<br>S protein D614G<br>N protein: R203K G204R | - | Naturally occurring             | [4]   |
| SARS-CoV-2 HK-13                            | Del-Mut-1          | Spike Δ679–688                                                                                         | - | Serial passage in Vero E6 cells | [5,6] |
| SARS-CoV-2 HK-13                            | Ca-DelMut          | Spike: P25L V367F del679–688<br>NSP3 A578V<br>Envelope F20S<br>ORF8: V62L L84S                         | - | Serial passage in Vero E6 cells | [6]   |
| SARS-CoV-2 SH01                             | Sdel               | Spike Δ683–689                                                                                         | - | Serial passage in Vero E6 cells | [7]   |
| SARS-CoV-2 strain<br>England/2/2020 (VE6-T) | ΔCS                | Spike: Δ679–686 V687I                                                                                  | - | Serial passage in Vero E6 cells | [8]   |
| SARS-CoV-2 USA-WA1/2020                     | rSARS-CoV-2/ORFΔ3a | ORF3a deletion                                                                                         | - | Reverse genetics                | [9]   |
| SARS-CoV-2 USA-WA1/2020                     | rSARS-CoV-2/ORFΔ6  | ORF6 deletion                                                                                          | - | Reverse genetics                | [9]   |
| SARS-CoV-2 USA-WA1/2020                     | rSARS-CoV-2/ORFΔ7a | ORF7a deletion                                                                                         | - | Reverse genetics                | [9]   |
| SARS-CoV-2 USA-WA1/2020                     | rSARS-CoV-2/ORFΔ7b | ORF7b deletion                                                                                         | - | Reverse genetics                | [9]   |

|                                                                                             |                        |                                                                                                                                                      |   |                                                                                      |      |
|---------------------------------------------------------------------------------------------|------------------------|------------------------------------------------------------------------------------------------------------------------------------------------------|---|--------------------------------------------------------------------------------------|------|
| SARS-CoV-2 USA-WA1/2020                                                                     | ΔPRRA                  | Spike Δ681–684                                                                                                                                       | - | Reverse genetics                                                                     | [10] |
| SARS-CoV-2 USA-WA1/2020                                                                     | CDX-005/COVI-VAC       | Codon pair deoptimized region:<br>24106–25378 (nt)<br>Spike Δ678–689                                                                                 | - | Reverse genetics                                                                     | [11] |
| SARS-CoV-2 USA-WA1/2020 mNeonGreen (SARS-CoV-2 USA-WA1/2020 expressing mNeonGreen reporter) | ΔPRRA mNeonGreen       | Spike Δ681–684                                                                                                                                       | - | Reverse genetics                                                                     | [10] |
| SARS-CoV-2 USA-WA1/2020 mNeonGreen (SARS-CoV-2 USA-WA1/2020 expressing mNeonGreen reporter) | ΔORF3-E virion         | Envelope deletion<br>ORF3 deletion<br>TRS replacement (ACGAAC to CCGGAU)                                                                             | - | Reverse genetics                                                                     | [12] |
| SARS-CoV-2 USA-WA1/2020 mNeonGreen (SARS-CoV-2 USA-WA1/2020 expressing mNeonGreen reporter) | ΔORF3-E P10 virion     | Envelope deletion<br>ORF3 deletion<br>TRS replacement (ACGAAC to CCGGAU)<br>NSP1 Y97N<br>NSP4 K35I<br>Spike P812R                                    | - | Reverse genetics+<br>passaging in<br>complementary<br>cell line                      | [12] |
| SARS-CoV-2 USA-WA1/2020 mNeonGreen (SARS-CoV-2 USA-WA1/2020 expressing mNeonGreen reporter) | S-IV-P5-Vero-P2 virion | Envelope deletion<br>ORF3 deletion<br>TRS replacement (ACGAAC to CCGGAU)<br>NSP15 A54T<br>NSP16 D108N<br>Spike: N679D S689G N709D<br>Membrane: T130N | - | Reverse genetics+<br>passaging in<br>complementary<br>cell line and<br>Vero E6 cells | [12] |
| SARS-CoV-2 WK-521                                                                           | R685H                  | Spike R685H                                                                                                                                          | - | Serial passage<br>in Vero E6 cells                                                   | [13] |
| SARS-CoV-2 WK-521                                                                           | del2                   | Spike Δ683–689                                                                                                                                       | - | Serial passage<br>in Vero E6 cells                                                   | [13] |

|                                                   |                                    |                                                                                                                                                                                                                                                                                                                |                           |                                                             |         |
|---------------------------------------------------|------------------------------------|----------------------------------------------------------------------------------------------------------------------------------------------------------------------------------------------------------------------------------------------------------------------------------------------------------------|---------------------------|-------------------------------------------------------------|---------|
| SARS-CoV-2 Wuhan-Hu-1/2019                        | rSARS-CoV-2 nsp14 Y420A            | NSP14 Y420A                                                                                                                                                                                                                                                                                                    | -                         | Reverse genetics                                            | [14]    |
| SARS-CoV-2 Wuhan-Hu-1/2019                        | sCPD9                              | Codon pair deoptimized region:<br>20358–21503 (nt)                                                                                                                                                                                                                                                             | -                         | Reverse genetics                                            | [15,16] |
| SARS-CoV-2 Wuhan-Hu-1/2019                        | sCPD10                             | Codon pair deoptimized region:<br>24308–25306 (nt)                                                                                                                                                                                                                                                             | -                         | Reverse genetics                                            | [15]    |
| SARS-CoV-2 Wuhan-Hu-1/2019                        | CPD6                               | Codon pair deoptimized regions:<br>11969–13450; 13953–14306 (nt)                                                                                                                                                                                                                                               | -                         | Reverse genetics                                            | [15]    |
| SARS-CoV-2/human/Korea/CNUHV03/2020               | CoV-2-CNUHV03-CA22°C               | NSP2: Δ82–84 M85V G233E<br>NSP3: N1184D G1585D S1922N<br>A2372V P2725L A2753V<br>NSP4: S2871G P2972S G2985R<br>NSP6: F3606L N3609K<br>NSP7 D3926A<br>NSP12: R4608W S4806N A5155V<br>NSP13: L5604F V5849I<br>NSP16: C7038S P7059S<br>Spike: C38Y S86F G96E G151S<br>S968A<br>ORF7a: Y67C<br>Nucleocapsid: I361K | -                         | Serial passage<br>in Vero E6 cells<br>- cold-<br>adaptation | [17]    |
| SARS-CoV MA15                                     | mutPBM/rSARS-CoV-MA15-<br>(E-PBM-) | Envelope DLLV73–76GGGG                                                                                                                                                                                                                                                                                         | Envelope DLLV72–75GGGG    | Reverse genetics                                            | [18–20] |
| SARS-CoV MA15                                     | N15A/rSARS-CoV-E-N15A              | Envelope N15A                                                                                                                                                                                                                                                                                                  | Envelope N15A             | Reverse genetics                                            | [18,21] |
| MERS-CoV EMC                                      | rMERS-CoV-ΔE                       | Envelope protein deletion                                                                                                                                                                                                                                                                                      | Envelope protein deletion | Reverse genetics                                            | [22]    |
| MERS-MA30                                         | rMERS-MA30-ΔE                      | Envelope protein deletion                                                                                                                                                                                                                                                                                      | Envelope protein deletion | Reverse genetics                                            | [22]    |
| MERS-MA30-Δ5<br>(MERS-MA30 with ORF5<br>deletion) | rMERS-MA30-Δ[5, E]                 | Envelope protein deletion                                                                                                                                                                                                                                                                                      | Envelope protein deletion | Reverse genetics                                            | [22]    |

|                                                                     |                                         |                                                            |                                                                 |                  |                  |
|---------------------------------------------------------------------|-----------------------------------------|------------------------------------------------------------|-----------------------------------------------------------------|------------------|------------------|
| rMERS-MA30-Δ[3, 4a, 4b, 5]<br>(MERS-MA30 with ORF3-5 deletion)      | rMERS-MA30-Δ[3, 4a, 4b, 5, E]           | Envelope protein deletion                                  | Envelope protein deletion                                       | Reverse genetics | [22]             |
| rSARS-CoV-Urbani-Δ[6–9b]<br>(SARS-CoV Urbani with ORF6–9b deletion) | rSARS-CoV-Δ[E, 6–9b]                    | Envelope protein deletion                                  | Envelope protein deletion                                       | Reverse genetics | [23]             |
| SARS-CoV MA15                                                       | rMA15-ΔE/rSARS-CoV-ΔE/rSARS-CoV-MA15-ΔE | Envelope protein deletion                                  | Envelope protein deletion                                       | Reverse genetics | [18,20,21,24–26] |
| SARS-CoV Urbani                                                     | rSARS-CoV-ΔE (rU-ΔE)                    | Envelope protein deletion                                  | Envelope protein deletion                                       | Reverse genetics | [23,24,27–30]    |
| SARS-CoV MA15                                                       | V25F/rSARS-CoV-EV25F                    | Envelope V25F                                              | Envelope V25F                                                   | Reverse genetics | [18,21]          |
| SARS-CoV MA15                                                       | Δ2                                      | Envelope Δ38-45                                            | Envelope Δ38-45                                                 | Reverse genetics | [18,26]          |
| SARS-CoV MA15                                                       | Δ3                                      | Envelope Δ46-52                                            | Envelope Δ46-52                                                 | Reverse genetics | [18,26]          |
| SARS-CoV MA15                                                       | Mut 1                                   | Envelope: S3A V5L T9A T11A                                 | Envelope: S3A V5L T9A T11A                                      | Reverse genetics | [18,26]          |
| MHV-GP <sup>1</sup>                                                 | MHV-Flt3L/gp                            | murine Flt3L gene inserted between Orf1ab and Spike genes  | mouse/human Flt3L gene inserted between Orf1ab and Spike genes  | Reverse genetics | [31]             |
| MHV-GP <sup>1</sup>                                                 | MHV-GM/GP                               | murine GM-CSF gene inserted between Orf1ab and Spike genes | mouse/human GM-CSF gene inserted between Orf1ab and Spike genes | Reverse genetics | [32]             |
| MHV-MelA <sup>2</sup>                                               | MHV-GM/MelA                             | murine GM-CSF gene inserted between Orf1ab and Spike genes | mouse/human GM-CSF gene inserted between Orf1ab and Spike genes | Reverse genetics | [32]             |
| MHV-GP <sup>1</sup>                                                 | MHV-IL15/gp                             | murine IL-15 gene inserted between Orf1ab and Spike genes  | mouse/human IL-15 gene inserted between Orf1ab and Spike genes  | Reverse genetics | [31]             |
| MHV-GP <sup>1</sup>                                                 | MHV-IL2/gp                              | murine IL-2 gene inserted between Orf1ab and Spike genes   | mouse/human IL-2 gene inserted between Orf1ab and Spike genes   | Reverse genetics | [31]             |

|                                                                                        |                      |                    |                    |                                                                     |      |
|----------------------------------------------------------------------------------------|----------------------|--------------------|--------------------|---------------------------------------------------------------------|------|
| MHV JHM.WU                                                                             | rWu.nsp1 K194        | NSP1 K194R         | NSP1 K125R         | Reverse genetics                                                    | [33] |
| MHV-A59                                                                                | A59.nsp1 K194R       | NSP1 K194R         | NSP1 K125R         | Reverse genetics                                                    | [33] |
| SARS-CoV MA15                                                                          | rSARS-CoV-nsp1-ΔC    | NSP1 Δ122-130      | NSP1 Δ122-130      | Reverse genetics                                                    | [18] |
| MHV JHM.WU                                                                             | rWu.nsp1 R193S/K194E | NSP1: R193S K194E  | NSP1: R124S K125E  | Reverse genetics                                                    | [33] |
| MHV-A59                                                                                | A59.nsp1 R193S/K194E | NSP1: R193S K194E  | NSP1: R124S K125E  | Reverse genetics                                                    | [33] |
| MHV-A59                                                                                | F476L MHV            | NSP12 F476L        | NSP12 F480L        | Reverse genetics (based on passaged remdesivir-resistant MHV virus) | [34] |
| MHV-A59                                                                                | V553L MHV            | NSP12 V553L        | NSP12 V557L        | Reverse genetics (based on passaged remdesivir-resistant MHV virus) | [34] |
| MHV-A59                                                                                | F476L V553L MHV      | NSP12: F476L V553L | NSP12: F480L V557L | Reverse genetics (based on passaged remdesivir-resistant MHV virus) | [34] |
| SARS-CoV MA15 NanoLuc (SARS-CoV MA15 expressing nanoluciferase with ORF7a/7b deletion) | F480L V557L SARS-CoV | NSP12: F480L V557L | NSP12: F480L V557L | Reverse genetics (based on passaged remdesivir-                     | [34] |

|                      |                                 |                                   |                                   | resistant MHV<br>virus) |         |
|----------------------|---------------------------------|-----------------------------------|-----------------------------------|-------------------------|---------|
| MHV JHM.WU           | rWU.nsp13 A335V                 | NSP13 A335V                       | NSP13 A336V                       | Reverse<br>genetics     | [33]    |
| MHV-A59              | D330A                           | NSP14 D330A                       | NSP14 D331A                       | Reverse<br>genetics     | [14,35] |
| MHV-A59              | MHV nsp14-N380A                 | NSP14 N380A                       | NSP14 N386A                       | Reverse<br>genetics     | [14]    |
| IBV M41R-nsp10.14rep | M41R-nsp10rep                   | NSP14 V393L                       | NSP14 V398L                       | Reverse<br>genetics     | [36]    |
| MHV-A59              | Y414A/rMHVnsp14-Y414A           | NSP14 Y414A                       | NSP14 Y420A                       | Reverse<br>genetics     | [14,35] |
| MHV-A59              | VUSS2                           | NSP14 Y414H                       | NSP14 Y420H                       | Reverse<br>genetics     | [37]    |
| IBV strain YN        | rSD-H223A                       | NSP15 H223A                       | NSP15 H234A                       | Reverse<br>genetics     | [38]    |
| MHV-A59              | N15m3                           | NSP15 H262A                       | NSP15 H234A                       | Reverse<br>genetics     | [39]    |
| PEDV Colorado        | icPEDV-EnUmt                    | NSP15 H226A                       | NSP15 H234A                       | Reverse<br>genetics     | [40]    |
| HCoV-229E            | HCoV-229E H250A                 | NSP15 H250A                       | NSP15 H249A                       | Reverse<br>genetics     | [41]    |
| IBV strain YN        | rSD-H238A                       | NSP15 H238A                       | NSP15 H249A                       | Reverse<br>genetics     | [38]    |
| MHV-A59              | MHV H277A                       | NSP15 H277A                       | NSP15 H249A                       | Reverse<br>genetics     | [41]    |
| IBV strain YN        | rSD-K278A                       | NSP15 K278A                       | NSP15 K289A                       | Reverse<br>genetics     | [38]    |
| IBV strain YN        | rSD-Y334A                       | NSP15 Y334A                       | NSP15 Y342A                       | Reverse<br>genetics     | [38]    |
| IBV strain YN        | rSD-<br>H223A/H238A/K278A/Y334A | NSP15: H223A H238A K278A<br>Y334A | NSP15: H234A H249A K289A<br>Y342A | Reverse<br>genetics     | [38]    |

|                           |                   |                               |                               |                  |            |
|---------------------------|-------------------|-------------------------------|-------------------------------|------------------|------------|
| HCoV-229E                 | HCoV-D129A        | NSP16 D129A                   | NSP16 D130A                   | Reverse genetics | [42]       |
| MERS-CoV EMC              | dNSP16            | NSP16 D130A                   | NSP16 D130A                   | Reverse genetics | [43]       |
| MERS-CoV MA1              | dNSP16            | NSP16 D130A                   | NSP16 D130A                   | Reverse genetics | [43]       |
| MHV-A59                   | MHV-D130A         | NSP16 D130A                   | NSP16 D130A                   | Reverse genetics | [42]       |
| PEDV PC22A                | D129A             | NSP16 D129A                   | NSP16 D130A                   | Reverse genetics | [44]       |
| SARS-CoV MA15             | dNSP16            | NSP16 D130A                   | NSP16 D130A                   | Reverse genetics | [45,46]    |
| SARS-CoV Urbani           | D130A             | NSP16 D130A                   | NSP16 D130A                   | Reverse genetics | [45]       |
| SARS-CoV Urbani           | K170A             | NSP16 K170A                   | NSP16 K170A                   | Reverse genetics | [45]       |
| SARS-CoV Urbani           | K46A              | NSP16 K46A                    | NSP16 K46A                    | Reverse genetics | [45]       |
| MHV-A59                   | MHV-Y15A          | NSP16 Y15A                    | NSP16 Y15A                    | Reverse genetics | [42]       |
| PEDV PC22A                | KDKE4A            | NSP16: K45A D129A K169A E202A | NSP16: K46A D130A K170A E203A | Reverse genetics | [44]       |
| GFP-expressing MHV-JHM IA | D1329A            | NSP3 D497A                    | NSP3 D226A                    | Reverse genetics | [47]       |
| SARS-CoV MA15             | D1022A            | NSP3 D204A                    | NSP3 D226A                    | Reverse genetics | [48]       |
| SARS-CoV MA15             | G1130V            | NSP3 G312V                    | NSP3 G334V                    | Reverse genetics | [48]       |
| SARS-CoV MA15             | H1045A            | NSP3 H227A                    | NSP3 H249A                    | Reverse genetics | [48]       |
| GFP-expressing MHV-JHM IA | N1347A/N1347A MHV | NSP3 N515A                    | NSP3 N244A                    | Reverse genetics | [47,49–51] |

|                                                           |                              |                                                  |                                                  |                                                                 |         |
|-----------------------------------------------------------|------------------------------|--------------------------------------------------|--------------------------------------------------|-----------------------------------------------------------------|---------|
| MHV-A59                                                   | MHV-N1348A                   | NSP3 N516A                                       | NSP3 N244A                                       | Reverse genetics                                                | [52]    |
| SARS-CoV MA15                                             | N1040A                       | NSP3 N222A                                       | NSP3 N244A                                       | Reverse genetics                                                | [48]    |
| GFP-expressing MHV-JHM IA                                 | A1438T/G1439V                | NSP3: A606G G607V                                | NSP3: A333G G334V                                | Reverse genetics                                                | [47]    |
| SARS-CoV MA15                                             | rSARS-CoV-MA15-Δ3a           | ORF3a deletion                                   | ORF3a deletion                                   | Reverse genetics                                                | [19]    |
| rSARS-CoV-MA15-Δ3a<br>(SARS-CoV MA15 with ORF3a deletion) | rSARS-CoV-MA15-(Δ3a,EΔ1)     | ORF3a deletion<br>E protein: S3A V5L T9A T11A    | ORF3a deletion<br>E protein: S3A V5L T9A T11A    | Reverse genetics                                                | [19]    |
| SARS-CoV MA15                                             | rSARS-CoV-MA15-((3a,E]-PBM-) | ORF3a SVPL271–274GMSM<br>E protein DLLV73–76GGGG | ORF3a SVPL272–275GMSM<br>E protein DLLV72–75GGGG | Reverse genetics                                                | [19]    |
| SARS-CoV MA15                                             | rSARS-CoV-MA15-3a-TMD2-      | ORF3a: S40A S58A                                 | ORF3a: S40A S58A                                 | Reverse genetics                                                | [19]    |
| SARS-CoV MA15                                             | rSARS-CoV-MA15-3a-TMD[2,3]-  | ORF3a: Y109A Y113A Q116A                         | ORF3a: Y109A Y113A Q116A                         | Reverse genetics                                                | [19]    |
| SARS-CoV MA15                                             | rSARS-CoV-MA15-3a-TMD3-      | ORF3a: Y91A H93A                                 | ORF3a: Y91A H93A                                 | Reverse genetics                                                | [19]    |
| SJHM-RA59/S4R29<br>MHV-A59 expressing MHV-JHM spike       | SJHM-L1114R                  | Spike L1114R                                     | Spike L1012R                                     | Reverse genetics                                                | [53]    |
| SARS-CoV Urbani                                           | T332I                        | Spike T332I                                      | Spike T345I                                      | Serial passage in Vero E6 cells - S109.8 antibody escape mutant | [54]    |
| SJHM-RA59/S4R29<br>MHV-A59 expressing MHV-JHM spike       | SJHM-HR1/R120/R121           | Spike: Q1067H Q1094H L1114R                      | Spike: Q965H Q992H L1012R                        | Reverse genetics                                                | [53,55] |
| SARS-CoV MA15                                             | CRG3-MA                      | TRS replacement (ACGAAC to CCGGAU)               | TRS replacement (ACGAAC to CCGGAU)               | Reverse genetics                                                | [56]    |

|                 |         |                                     |                                     |                  |      |
|-----------------|---------|-------------------------------------|-------------------------------------|------------------|------|
| SARS-CoV Urbani | CRG3    | TRS replacement (ACGAAC to CCGGAU)  | TRS replacement (ACGAAC to CCGGAU)  | Reverse genetics | [56] |
| SARS-CoV MA15   | CRG7-MA | TRS replacement (ACGAAC to UGGUCGC) | TRS replacement (ACGAAC to UGGUCGC) | Reverse genetics | [56] |

<sup>1</sup>MHV-A59-based vector lacking NS2, HE protein, ORF4, ORF5a and E protein and with 99-nt deletion in NSP1 and encoding a LCMV epitope gp33-41 and EGFP fusion protein; <sup>2</sup>MHV-A59-based vector lacking NS2, HE protein, ORF4, ORF5a and E protein and with 99-nt deletion in NSP1 and encoding a human melanoma Mel-A26-35 epitope and EGFP fusion protein

**Table S2b.** A summary of the results of *in vivo* experiments involving the included viruses excluding experiments involving knock-out animal models.

| Parental (WT) virus | Mutations/virus name                                                                                                                   | Model                                     | Dose, route if not intranasal      | Infection outcome (compared to WT if presented)                                                                                                             | Reference |
|---------------------|----------------------------------------------------------------------------------------------------------------------------------------|-------------------------------------------|------------------------------------|-------------------------------------------------------------------------------------------------------------------------------------------------------------|-----------|
| SARS-CoV-2          | strain TY38-873 (Omicron) Lineage BA.1                                                                                                 | 4-week-old Syrian hamsters                | 10 <sup>5</sup> TCID <sub>50</sub> | No weight loss, less severe histopathological changes in lungs, less severe pulmonary mechanics changes, no blood oxygen saturation drop, lower viral loads | [1]       |
| SARS-CoV-2          | Omicron variant, strain B.1.1.529, isolate hCoV-19/USA/WI-WSLH-221686/2021 Lineage BA.1                                                | 5-month-old female K18-hACE2 mice         | 10 <sup>5</sup> FFU                | No weight loss                                                                                                                                              | [2]       |
|                     |                                                                                                                                        | Syrian hamsters                           | 10 <sup>3</sup> PFU                | Reduced viral load in lungs and nasal wash                                                                                                                  |           |
|                     |                                                                                                                                        | K18-hACE2 Syrian hamsters                 | 10 <sup>3</sup> PFU                | Reduced mortality and viral titers                                                                                                                          |           |
| SARS-CoV-2          | hCoV-19/USA/NY-MSHSPSP-PV44476/2021 Lineage BA.1                                                                                       | 6–8-week-old female 129S1 mice            | 10 <sup>4</sup> PFU                | No weight loss, reduced viral titers                                                                                                                        | [2]       |
|                     |                                                                                                                                        | 6-month-old female K18-hACE2 mice         | 10 <sup>4</sup> PFU                | No weight loss, reduced lung CXCL10 and IL-6 concentrations, no increase in lung TNF- $\alpha$ and IFN- $\gamma$ levels                                     |           |
| SARS-CoV-2          | Omicron variant, lineage BA.1, isolates: hCoV-19/USA/NY-MSHSPSP-PV44488/2021 hCoV-19/USA/GA-EHC-2811C/2021 hCoV-19/Japan/NC928-2N/2021 | 6–8-week-old female 129S1 mice            | 10 <sup>4</sup> PFU                | No weight loss, reduced lung viral titer                                                                                                                    | [2]       |
|                     |                                                                                                                                        | 10–20-week-old male and female 129S1 mice | 10 <sup>6</sup> PFU                | No weight loss, reduced lung viral titers                                                                                                                   |           |
|                     |                                                                                                                                        | 10–14-month-old C57BL/6 mice              | 10 <sup>5</sup> PFU                | No weight loss                                                                                                                                              |           |
|                     |                                                                                                                                        | 6-week-old BALB/c mice                    | 10 <sup>5</sup> PFU                | Reduced lung and nasal turbinate viral titers, no changes in pulmonary mechanics                                                                            |           |
|                     |                                                                                                                                        | Syrian hamsters                           | 10 <sup>3</sup> PFU                | Reduced lung CT pathology, reduced lung viral titers, no                                                                                                    |           |
|                     |                                                                                                                                        |                                           |                                    |                                                                                                                                                             |           |

|                                          |                                                                                      |                                             |                             |                                                                                                                       |     |
|------------------------------------------|--------------------------------------------------------------------------------------|---------------------------------------------|-----------------------------|-----------------------------------------------------------------------------------------------------------------------|-----|
|                                          |                                                                                      |                                             |                             | changes in lung respiratory mechanics                                                                                 |     |
|                                          |                                                                                      | Syrian hamsters                             | 10 <sup>3</sup> PFU         | No weight loss                                                                                                        |     |
|                                          |                                                                                      | Syrian hamsters                             | 10 <sup>4</sup> PFU         | No weight loss, reduced viral load in nasal wash                                                                      |     |
|                                          |                                                                                      | Syrian hamsters                             | 10 <sup>3</sup> PFU         | Lung inflammation but no other lung pathology                                                                         |     |
| SARS-CoV-2                               | B.1.1.529/Omicron (GenBank: OM212472) SARS-CoV-2/human/HKG/HKU-691/2021 Lineage BA.1 | 6–8-week-old male and female K18-hACE2 mice | 2×10 <sup>3</sup> PFU       | Reduced lung and nasal viral loads and titers, reduced lung pathology, reduced lung CXCL10 and IFN-γ expression       | [3] |
|                                          |                                                                                      | 6–8-week-old male and female K18-hACE2 mice | 2×10 <sup>3</sup> PFU       | Reduced mortality and weight loss                                                                                     |     |
|                                          |                                                                                      | 6–8-week-old female C57BL/6J mice           | 10 <sup>5</sup> PFU         | Reduced lung and nasal viral titers and loads                                                                         |     |
| SARS-CoV-2                               | SARS-CoV2 GZ69                                                                       | Human patient                               | Unknown (Natural infection) | E gene Ct: 11,6; RdRP gene Ct: 13,9; N gene Ct: 15,5; no symptoms                                                     | [4] |
| SARS-CoV-2 HK-13                         | Spike Δ679–688                                                                       | 7–8-week-old golden Syrian hamsters         | 1.5×10 <sup>5</sup> PFU     | Reduced lung and tracheal viral titer, no weight loss, reduced lung pathology                                         | [5] |
| SARS-CoV-2 HK-13                         | Spike: P25L V367F del679–688 NSP3 A578V Envelope F20S ORF8: V62L L84S                | 7–8-week-old golden Syrian hamsters         | 10 <sup>3</sup> PFU         | Decreased lung viral titers, no weight loss, no lung IFN-γ, TNF-α, IL-6 expression increase                           | [6] |
| SARS-CoV-2 SH01                          | Spike Δ683–689                                                                       | 7–8-week-old male golden Syrian hamsters    | 5×10 <sup>5</sup> PFU       | No weight loss, reduced viral titers in nasal turbinates, trachea and lungs, reduced viral loads in different tissues | [7] |
| SARS-CoV-2 strain England/2/2020 (VE6-T) | Spike: Δ679–686 V687I                                                                | 16–20-week-old outbred female ferrets       | 10 <sup>5</sup> PFU         | Reduced viral titer and viral load in nasal washes                                                                    | [8] |

|                                                                                             |                                                                        |                                          |                                                              |                                                                                                                                                                                               |      |
|---------------------------------------------------------------------------------------------|------------------------------------------------------------------------|------------------------------------------|--------------------------------------------------------------|-----------------------------------------------------------------------------------------------------------------------------------------------------------------------------------------------|------|
| SARS-CoV-2 USA-WA1/2020                                                                     | ORF3a deletion                                                         | 6–8 week-old K18-hACE2 mice              | 10 <sup>5</sup> PFU                                          | Slightly reduced mortality, reduced lung viral titers, reduced lung pathology, decreased IFN- $\alpha$ and IFN- $\gamma$ levels, lower IL-6/IL-10 ratio                                       | [9]  |
| SARS-CoV-2 USA-WA1/2020                                                                     | ORF6 deletion                                                          | 6–8 week-old K18-hACE2 mice              | 10 <sup>5</sup> PFU                                          | Reduced mortality, reduced lung pathology, decreased IFN- $\gamma$ levels                                                                                                                     | [9]  |
| SARS-CoV-2 USA-WA1/2020                                                                     | ORF7a deletion                                                         | 6–8 week-old K18-hACE2 mice              | 10 <sup>5</sup> PFU                                          | Reduced mortality, decreased IFN- $\gamma$ levels                                                                                                                                             | [9]  |
| SARS-CoV-2 USA-WA1/2020                                                                     | ORF7b deletion                                                         | 6–8 week-old K18-hACE2 mice              | 10 <sup>5</sup> PFU                                          | Reduced mortality, decreased IFN- $\alpha$ levels, increased TNF- $\alpha$ concentrations at later time points                                                                                | [9]  |
| SARS-CoV-2 USA-WA1/2020                                                                     | Spike $\Delta$ 681–684                                                 | 7–8 week-old male golden Syrian hamsters | 10 <sup>5</sup> PFU                                          | No weight loss, no reduced activity                                                                                                                                                           | [10] |
|                                                                                             |                                                                        | 5–9-week-old K18-hACE2 mice              | 10 <sup>3</sup> PFU                                          | Reduced weight loss, milder changes in pulmonary mechanics, reduced lung pathology, reduced lung IFN- $\gamma$ and CXCL10 concentrations, increased lung IL-1 $\beta$ and IL-6 concentrations |      |
| SARS-CoV-2 USA-WA1/2020                                                                     | Codon pair deoptimized region: 24106–25378 (nt) Spike $\Delta$ 678–689 | 5–6-week-old male golden Syrian hamster  | 5 $\times$ 10 <sup>4</sup> PFU                               | No weight loss, no lung pathology other than inflammation                                                                                                                                     | [11] |
| SARS-CoV-2 USA-WA1/2020 mNeonGreen (SARS-CoV-2 USA-WA1/2020 expressing mNeonGreen reporter) | Envelope deletion ORF3 deletion TRS replacement (ACGAAC to CCGGAU)     | 4–5-week-old golden Syrian hamsters      | 10 <sup>5</sup> TCID <sub>50</sub>                           | No weight loss, no detectable disease, reduced viral load                                                                                                                                     | [12] |
|                                                                                             |                                                                        | 7–9-week-old K18-hACE2 mice              | 3 $\times$ 10 <sup>5</sup> TCID <sub>50</sub>                | No weight loss or death                                                                                                                                                                       |      |
|                                                                                             |                                                                        | 7–9-week-old K18-hACE2 mice              | 6 $\times$ 10 <sup>4</sup> TCID <sub>50</sub> , intracranial | No morbidity, no mortality, no weight loss                                                                                                                                                    |      |

|                                                                                             |                                                                                                                                                      |                                          |                                       |                                                                                                                                                                                            |      |
|---------------------------------------------------------------------------------------------|------------------------------------------------------------------------------------------------------------------------------------------------------|------------------------------------------|---------------------------------------|--------------------------------------------------------------------------------------------------------------------------------------------------------------------------------------------|------|
| SARS-CoV-2 USA-WA1/2020 mNeonGreen (SARS-CoV-2 USA-WA1/2020 expressing mNeonGreen reporter) | Envelope deletion<br>ORF3 deletion<br>TRS replacement (ACGAAC to CCGGAU)<br>NSP15 A54T<br>NSP16 D108N<br>Spike: N679D S689G N709D<br>Membrane: T130N | 4–5-week-old golden Syrian hamsters      | $5 \times 10^3$ TCID <sub>50</sub>    | No weight loss, no detectable disease                                                                                                                                                      | [12] |
|                                                                                             |                                                                                                                                                      | 7–9-week-old K18-hACE2 mice              | $2.5 \times 10^3$ TCID <sub>50</sub>  | No weight loss or death                                                                                                                                                                    |      |
|                                                                                             |                                                                                                                                                      | 7–9-week-old K18-hACE2 mice              | 500 TCID <sub>50</sub> , intracranial | No morbidity, no mortality, no weight loss                                                                                                                                                 |      |
| SARS-CoV-2 WK-521                                                                           | Spike R685H                                                                                                                                          | 4–6-week-old male golden Syrian hamsters | $1.5 \times 10^4$ PFU                 | No weight loss, reduced lung microscopic pathology and gross pathology, reduced expression of IFN- $\gamma$ , IL-6 and CXCL10 in lungs, reduced viral titers in nasal turbinates and lungs | [13] |
| SARS-CoV-2 WK-521                                                                           | Spike $\Delta$ 683–689                                                                                                                               | 4–6-week-old male golden Syrian hamsters | $1.5 \times 10^4$ PFU                 | No weight loss, reduced lung microscopic pathology and gross pathology, reduced expression of IFN- $\gamma$ , IL-6 and CXCL10 in lungs, reduced viral titers in nasal turbinates and lungs | [13] |
| SARS-CoV-2 Wuhan-Hu-1/2019                                                                  | NSP14 Y420A                                                                                                                                          | 8-week-old K18-hACE2 mice                | $10^3$ PFU                            | No mortality, no or reduced weight loss, reduced lung pathology,                                                                                                                           | [14] |
| SARS-CoV-2 Wuhan-Hu-1/2019                                                                  | Codon pair deoptimized region: 20358–21503 (nt)                                                                                                      | 6-week-old golden Syrian hamsters        | $10^4$ FFU                            | Reduced weight loss, no signs of infection, reduced lung pathology and inflammation                                                                                                        | [15] |
|                                                                                             |                                                                                                                                                      | 5–7-week-old Roborovski dwarf hamsters   | $10^5$ FFU                            | Minimal weight loss, no signs of infection                                                                                                                                                 |      |

|                                                                      |                                                               |                                    |                         |                                                                                                                                                |         |
|----------------------------------------------------------------------|---------------------------------------------------------------|------------------------------------|-------------------------|------------------------------------------------------------------------------------------------------------------------------------------------|---------|
| SARS-CoV-2 Wuhan-Hu-1/2019                                           | Codon pair deoptimized region: 24308–25306 (nt)               | 6-week-old golden Syrian hamsters  | 10 <sup>4</sup> FFU     | Reduced weight loss, no signs of infection                                                                                                     | [15]    |
| SARS-CoV-2 Wuhan-Hu-1/2019                                           | Codon pair deoptimized regions: 11969–13450; 13953–14306 (nt) | 6-week-old golden Syrian hamsters  | 10 <sup>5</sup> FFU     | Reduced lung pathology and inflammation, reduced weight loss                                                                                   | [15]    |
| SARS-CoV-2/human/Korea/CNUHV03/2020                                  | CoV-2-CNUHV03-CA22°C                                          | 5–6-week-old female K18-hACE2 mice | 2×10 <sup>4</sup> PFU   | No mortality, reduced weight loss, reduced lung inflammation, reduced lung viral loads, no virus in extrapulmonary tissues                     | [17]    |
| SARS-CoV MA15                                                        | Envelope DLLV73–76GGGG                                        | 16-week-old female BALB/c mice     | 10 <sup>5</sup> PFU     | No mortality, reduced weight loss, no lung gross pathology and minimal lung pathology and pneumonia, no increase in CXCL10 and IL-6 expression | [18–20] |
| SARS-CoV MA15                                                        | Envelope N15A                                                 | 16-week-old female BALB/c mice     | 10 <sup>5</sup> PFU     | Reduced mortality, reduced lung pathology, smaller increase in airway IL-1 $\beta$ , TNF- $\alpha$ and IL-6 concentrations                     | [18,21] |
| MERS-CoV EMC                                                         | Envelope protein deletion                                     | 16–24-week-old K18-hDPP4 mice      | 5×10 <sup>3</sup> FFU   | No mortality, reduced weight loss                                                                                                              | [22]    |
| MERS-MA30                                                            | Envelope protein deletion                                     | 16–24-week-old hDPP4-KI mice       | 10 <sup>4</sup> FFU     | No mortality or weight loss                                                                                                                    | [22]    |
| MERS-MA30- $\Delta$ 5 (MERS-MA30 with ORF5 deletion)                 | Envelope protein deletion                                     | 16–24-week-old hDPP4-KI mice       | 10 <sup>4</sup> FFU     | No mortality or weight loss                                                                                                                    | [22]    |
| rMERS-MA30- $\Delta$ [3, 4a, 4b, 5] (MERS-MA30 with ORF3-5 deletion) | Envelope protein deletion                                     | 16–24-week-old hDPP4-KI mice       | 10 <sup>4</sup> FFU     | Parental virus was already highly attenuated, no changes in virulence based on published data                                                  | [22]    |
|                                                                      |                                                               | 6–8-week-old BALB/c mice           | 1.2×10 <sup>4</sup> PFU | No mortality or weight loss                                                                                                                    | [23,29] |

|                                                                     |                           |                                |                                    |                                                                                                                                                                                           |                  |
|---------------------------------------------------------------------|---------------------------|--------------------------------|------------------------------------|-------------------------------------------------------------------------------------------------------------------------------------------------------------------------------------------|------------------|
| rSARS-CoV-Urbani-Δ[6–9b]<br>(SARS-CoV Urbani with ORF6–9b deletion) | Envelope protein deletion | hACE2-Tg mice                  | 1.2×10 <sup>4</sup> PFU            | No mortality, no weight loss, no neuroinfection                                                                                                                                           |                  |
| SARS-CoV MA15                                                       | Envelope protein deletion | 6-week-old BALB/c mice         | 5×10 <sup>4</sup> PFU              | No mortality or weight loss                                                                                                                                                               | [18,20,21.24–26] |
|                                                                     |                           | 12-month-old BALB/c mice       | 5×10 <sup>4</sup> PFU              | No mortality or weight loss                                                                                                                                                               |                  |
|                                                                     |                           | 6-week-old BALB/c mice         | 6×10 <sup>3</sup> PFU              | No mortality, lung inflammation                                                                                                                                                           |                  |
|                                                                     |                           | 12-month-old BALB/c mice       | 6×10 <sup>3</sup> PFU              | No mortality, no clinical disease, lung inflammation                                                                                                                                      |                  |
|                                                                     |                           | 18-month-old BALB/c mice       | 6×10 <sup>3</sup> PFU              | No mortality, no clinical disease, lung inflammation, minimal weight loss                                                                                                                 |                  |
|                                                                     |                           | 8-week-old female BALB/c mice  | 6×10 <sup>3</sup> PFU              | Reduced lung inflammation                                                                                                                                                                 |                  |
|                                                                     |                           | 16-week-old female BALB/c mice | 10 <sup>5</sup> PFU                | No mortality or weight loss, reduced lung viral titers, reduced TNF-α, CXCL10 and IL-6 expression, no disease symptoms, no lung gross pathology, reduced lung pathology and inflammation, |                  |
|                                                                     |                           | 16-week-old BALB/c mice        | 10 <sup>5</sup> PFU                | No mortality, no weight loss, no signs of disease, reduced lung pathology and inflammation, smaller lung TNF, CSCL10 and IL-6 expression                                                  |                  |
|                                                                     |                           | Golden Syrian hamsters         | 10 <sup>4</sup> TCID <sub>50</sub> | Reduced lung inflammation, no reduction in animal activity, reduced viral titers                                                                                                          |                  |
| SARS-CoV Urbani                                                     | Envelope protein deletion | 12-month-old BALB/c mice       | 6×10 <sup>3</sup> PFU              | No mortality or weight loss, limited lung pathology                                                                                                                                       | [23,24,27–30]    |
|                                                                     |                           | 6–8-week-old BALB/c mice       | 1.2×10 <sup>4</sup> PFU            | No mortality or weight loss                                                                                                                                                               |                  |

|                       |                                                                  |                                |                         |                                                                                                                                                                                            |      |
|-----------------------|------------------------------------------------------------------|--------------------------------|-------------------------|--------------------------------------------------------------------------------------------------------------------------------------------------------------------------------------------|------|
|                       |                                                                  | hACE2-Tg mice                  | 1.2×10 <sup>4</sup> PFU | No mortality, no weight loss,<br>no brain infection,                                                                                                                                       |      |
| SARS-CoV MA15         | Envelope V25F                                                    | 16-week-old female BALB/c mice | 1.2×10 <sup>4</sup> PFU | Slightly reduced mortality                                                                                                                                                                 | [21] |
| SARS-CoV MA15         | Envelope Δ38–45                                                  | 16-week-old BALB/c mice        | 10 <sup>5</sup> PFU     | No mortality, no weight loss,<br>no signs of disease, reduced<br>lung viral titers, reduced lung<br>damage and inflammation                                                                | [26] |
| SARS-CoV MA15         | Envelope Δ46–52                                                  | 16-week-old BALB/c mice        | 10 <sup>5</sup> PFU     | No mortality, no weight loss,<br>no signs of disease, reduced<br>lung viral titers, reduced lung<br>damage and inflammation,<br>reduced lung TNF, CXCL10,<br>IL-6 and IFN-γ concentrations | [26] |
| SARS-CoV MA15         | Envelope: S3A V5L T9A<br>T11A                                    | 16-week-old BALB/c mice        | 10 <sup>5</sup> PFU     | No mortality, reduced weight<br>loss, no signs of disease,<br>reduced lung damage and<br>inflammation                                                                                      | [26] |
| MHV-GP <sup>1</sup>   | murine Flt3L gene<br>inserted between Orf1ab<br>and Spike genes  | 6–9 week-old C57BL/6 mice      | 10 <sup>6</sup> PFU     | Not described, parental virus<br>is already highly attenuated                                                                                                                              | [31] |
| MHV-GP <sup>1</sup>   | murine GM-CSF gene<br>inserted between Orf1ab<br>and Spike genes | 6–9 week-old C57BL/6 mice      | 10 <sup>6</sup> PFU     | Not described, parental virus<br>is already highly attenuated                                                                                                                              | [31] |
| MHV-MelA <sup>2</sup> | murine GM-CSF gene<br>inserted between Orf1ab<br>and Spike genes | 6–9 week-old C57BL/6 mice      | 10 <sup>6</sup> PFU     | Not described, parental virus<br>is already highly attenuated                                                                                                                              | [32] |
| MHV-GP <sup>1</sup>   | murine IL-15 gene<br>inserted between Orf1ab<br>and Spike genes  | 6–9 week-old C57BL/6 mice      | 10 <sup>6</sup> PFU     | Not described, parental virus<br>is already highly attenuated                                                                                                                              | [32] |
| MHV-GP <sup>1</sup>   | murine IL-2 gene<br>inserted between Orf1ab<br>and Spike genes   | 6–9 week-old C57BL/6 mice      | 10 <sup>6</sup> PFU     | Not described, parental virus<br>is already highly attenuated                                                                                                                              | [31] |

|                                                                                        |                       |                                |                                   |                                                                                                                                               |         |
|----------------------------------------------------------------------------------------|-----------------------|--------------------------------|-----------------------------------|-----------------------------------------------------------------------------------------------------------------------------------------------|---------|
| MHV JHM.WU                                                                             | NSP1 K194R            | 4-week-old C57BL/6 mice        | 500 PFU intrahepatic              | Reduced liver viral titer                                                                                                                     | [33]    |
| MHV-A59                                                                                | NSP1 K194R            | 4-week-old C57BL/6 mice        | 5000 PFU intrahepatic             | Reduced liver viral titer                                                                                                                     | [33]    |
| SARS-CoV MA15                                                                          | NSP1 $\Delta$ 122-130 | 16-week-old female BALB/c mice | $10^5$ PFU                        | No mortality, reduced weight loss, no gross lung pathology, no lung damage                                                                    | [18]    |
| MHV-A59                                                                                | NSP1: R193S K194E     | 4-week-old C57BL/6 mice        | 5000 PFU intrahepatic             | Reduced liver viral titer                                                                                                                     | [33]    |
| SARS-CoV MA15 NanoLuc (SARS-CoV MA15 expressing nanoluciferase with ORF7a/7b deletion) | NSP12: F480L V557L    | 10-week-old female BALB/c mice | $10^3$ PFU                        | No significant difference                                                                                                                     | [34]    |
|                                                                                        |                       | 10-week-old female BALB/c mice | $10^4$ PFU                        | Reduced lung viral titer, reduced weight loss                                                                                                 |         |
| MHV JHM.WU                                                                             | NSP13 A335V           | 4-week-old C57BL/6 mice        | 500 PFU intrahepatic              | Reduced liver viral titer                                                                                                                     | [33]    |
| MHV-A59                                                                                | NSP14 D330A           | 4-week-old male C57BL/6 mice   | $2 \times 10^6$ PFU intrahepatic  | No mortality, no weight loss, minimal liver inflammation and no liver fibrosis, increased serum IFN- $\beta$ levels at 12 hpi but not 24 hpi, | [14,35] |
|                                                                                        |                       | 4-week-old male C57BL/6 mice   | $5 \times 10^5$ PFU subcutaneous  | No significant difference – parental virus did not produce disease                                                                            |         |
| IBV M41R-nsp10.14rep                                                                   | NSP14 V393L           | 8-days old chickens            | $10^5$ PFU intraocular+intranasal | Shorter duration of infection, reduced symptoms, smaller reduction in ciliary activity                                                        | [36]    |
| MHV-A59                                                                                | NSP14 Y414A           | 4-week-old male C57BL/6 mice   | $2 \times 10^6$ PFU intrahepatic  | No mortality, no weight loss, minimal liver inflammation and no liver fibrosis, increased serum IFN- $\beta$ levels at 12 hpi but not 24 hpi, | [14,35] |
|                                                                                        |                       | 4-week-old male C57BL/6 mice   | $5 \times 10^5$ PFU subcutaneous  | No significant difference – parental virus did not produce disease                                                                            |         |
|                                                                                        |                       | 4-week-old male C57BL/6 mice   | $10^4$ PFU intrahepatic           | No mortality, minor increase in serum ALT, no                                                                                                 |         |

|               |             |                                |                                               |  |                                                                                                                                          |      |
|---------------|-------------|--------------------------------|-----------------------------------------------|--|------------------------------------------------------------------------------------------------------------------------------------------|------|
|               |             |                                |                                               |  | neuroinfection, no liver pathology, increased serum IFN- $\beta$ concentrations at 1 dpi but lower at 3 dpi                              |      |
|               |             |                                |                                               |  | No mortality, minor increase in serum ALT, no liver infection, no liver pathology, smaller increase in serum IFN- $\beta$ concentrations |      |
|               |             |                                |                                               |  | Earlier alteration in gene expression in liver                                                                                           |      |
| MHV-A59       | NSP14 Y414H | 4-week-old male C57BL/6 mice   | 10 <sup>4</sup> PFU intracranial              |  |                                                                                                                                          | [37] |
|               |             | 4-week-old male C57BL/6 mice   | 7.5×10 <sup>5</sup> PFU intrahepatic          |  |                                                                                                                                          |      |
|               |             | 4-week-old C57BL/6 mice        | Intracranial                                  |  | Increased LD <sub>50</sub>                                                                                                               |      |
|               |             | 4-week-old C57BL/6 mice        | 5×10 <sup>4</sup> PFU intracranial            |  | Reduced brain viral titers, no liver infection                                                                                           |      |
| MHV-A59       | NSP15 H262A | 6-week-old female C57BL/6 mice | 10 <sup>4</sup> PFU intraperitoneal           |  | No mortality, no viral titer in liver or spleen, reduced weight loss, no liver pathology                                                 | [39] |
| PEDV Colorado | NSP15 H226A | 7-day-old piglets              | 10 <sup>5</sup> TCID <sub>50</sub> oral       |  | reduced viral shedding, no mortality, similar disease and pathology                                                                      | [40] |
| IBV strain YN | NSP15 H238A | 1-day-old chickens             | 10 <sup>6</sup> EID <sub>50</sub> intraocular |  | No clinical signs of disease, reduced ciliary injury, reduced viral loads, no tracheal, lung and kidney pathology                        | [38] |
| MHV-A59       | NSP15 H277A | 8–10-week-old C57BL/6 mice     | 500 PFU intraperitoneal                       |  | No virus in spleen or liver                                                                                                              | [41] |
| IBV strain YN | NSP15 Y334A | 1-day-old chickens             | 10 <sup>6</sup> EID <sub>50</sub> intraocular |  | No clinical signs of disease, reduced ciliary injury, reduced viral loads, no tracheal, lung and kidney pathology                        | [38] |

|               |                                  |                                                    |                         |                                                                                                                  |      |
|---------------|----------------------------------|----------------------------------------------------|-------------------------|------------------------------------------------------------------------------------------------------------------|------|
| MERS-CoV EMC  | NSP16 D130A                      | Ad5-hDPP4-transduced 10-to-20-week-old BALB/c mice | 10 <sup>6</sup> PFU     | No viral replication at 2 dpi, parental virus was already non-pathogenic                                         | [43] |
|               |                                  | 10–20-week-old Dpp4 288–330 <sup>+/+</sup> mice    | 10 <sup>6</sup> PFU     | Reduced IFN- $\beta$ , IFN- $\alpha$ 4 and IFN- $\alpha$ 7 expression, parental virus was already non-pathogenic |      |
| MERS-CoV MA1  | NSP16 D130A                      | 10–20-week-old Dpp4 288–330 <sup>+/+</sup> mice    | 10 <sup>6</sup> PFU     | No mortality, reduced weight loss, reduced lung pathology                                                        | [43] |
| MHV-A59       | NSP16 D130A                      | 6–9 week-old C57BL/6 mice                          | 500 PFU intraperitoneal | No virus present in spleen and liver at 2 dpi                                                                    | [42] |
| SARS-CoV MA15 | NSP16 D130A                      | 10-week-old female BALB/c mice                     | 10 <sup>5</sup> PFU     | No mortality, no significant pulmonary mechanics changes,                                                        |      |
|               |                                  | 10-week-old C57BL/6 mice                           | 10 <sup>5</sup> PFU     | Reduced weight loss, reduced lung pathology                                                                      |      |
|               |                                  | 10-week-old female BALB/c mice                     | 100 PFU                 | Minimal weight loss                                                                                              |      |
|               |                                  | 20 week-old C57BL/6 mice                           | No data                 | No mortality, disease course similar until 4 dpi                                                                 |      |
|               |                                  | 12-month-old female BALB/c mice                    | 10 <sup>5</sup> PFU     | Lethal infection, but viral titer reduced at 4 dpi                                                               |      |
|               |                                  | 12-month-old female BALB/c mice                    | 100 PFU                 | Reduced weight loss, no mortality, reduced lung viral titer, reduced changes in pulmonary mechanics              |      |
| MHV-A59       | NSP16 Y15A                       | 6–9 week-old C57BL/6 mice                          | 500 PFU intraperitoneal | No virus present in spleen and liver at 2 dpi                                                                    | [42] |
| PEDV PC22A    | NSP16: K45A D129A<br>K169A E202A | 4-days-old piglets                                 | 100 PFU oral            | Reduced mortality, reduced intestinal pathology, lower and delayed peak titer of shed virus                      | [44] |

|                           |                   |                                 |                                         |                                                                                                                                                                                         |         |
|---------------------------|-------------------|---------------------------------|-----------------------------------------|-----------------------------------------------------------------------------------------------------------------------------------------------------------------------------------------|---------|
| GFP-expressing MHV-JHM IA | NSP3 D497A        | 5–8-week-old C57BL/6 mice       | 3×10 <sup>3</sup> PFU                   | Reduced mortality                                                                                                                                                                       | [47]    |
| SARS-CoV MA15             | NSP3 D204A        | 7–9 week-old female BALB/c mice | 3×10 <sup>4</sup> PFU                   | Reduced mortality and weight loss                                                                                                                                                       | [48]    |
| SARS-CoV MA15             | NSP3 G312V        | 7–9 week-old female BALB/c mice | 3×10 <sup>4</sup> PFU                   | No mortality, reduced weight loss                                                                                                                                                       | [48]    |
| SARS-CoV MA15             | NSP3 H227A        | 7–9 week-old female BALB/c mice | 3×10 <sup>4</sup> PFU                   | Reduced mortality and weight loss                                                                                                                                                       | [48]    |
| GFP-expressing MHV-JHM IA | NSP3 N515A        | 5–8-week-old C57BL/6 mice       | 3×10 <sup>4</sup> PFU                   | No mortality, no weight loss                                                                                                                                                            | [47.50] |
|                           |                   | 5–8-week-old male C57BL/6 mice  | 4×10 <sup>4</sup> PFU                   | No mortality, no weight loss, reduced brain viral titers, reduced expression of IFN- $\beta$ , IL-6 and TNF- $\alpha$ in brains, reduced brain pathology                                |         |
|                           |                   | 5–8-week-old male C57BL/6 mice  | 750 PFU                                 | No mortality, reduced weight loss                                                                                                                                                       |         |
| MHV-A59                   | NSP3 N516A        | 6–9-week-old C57BL/6 mice       | 5–5×10 <sup>5</sup> PFU intraperitoneal | No liver pathology, reduced serum ALT increase                                                                                                                                          | [52]    |
|                           |                   | 6–9-week-old 129Sv mice         | 5 PFU intraperitoneal                   | Decreased liver and spleen IFN- $\alpha$ levels, decreased liver and spleen IL-6                                                                                                        |         |
| SARS-CoV MA15             | NSP3 N222A        | 7–9 week-old female BALB/c mice | 3×10 <sup>4</sup> PFU                   | Reduced mortality, reduced weight loss, larger increase in IFN- $\alpha$ , IFN- $\beta$ , CXCL-10, IL-6 and TNF expression in lungs at 24 hpi but not at 72 hpi, reduced lung pathology | [48]    |
| GFP-expressing MHV-JHM IA | NSP3: A606G G607V | 5–8-week-old male C57BL/6 mice  | 3×10 <sup>3</sup> PFU                   | No mortality, no weight loss                                                                                                                                                            | [47]    |
| SARS-CoV MA15             | ORF3a deletion    | 16-week-old BALB/c female mice  | 10 <sup>5</sup> PFU                     | No mortality, reduced weight loss, reduced lung viral titer, reduced disease symptoms                                                                                                   | [19]    |

<sup>1</sup>MHV-A59-based vector lacking NS2, HE protein, ORF4, ORF5a and E protein and with 99-nt deletion in NSP1 and encoding a LCMV epitope gp33-41 and EGFP fusion protein; <sup>2</sup>MHV-A59-based vector lacking NS2, HE protein, ORF4, ORF5a and E protein and with 99-nt deletion in NSP1

|                                                     |                                                  |                                |                      |                                                                                                                                                                            |         |
|-----------------------------------------------------|--------------------------------------------------|--------------------------------|----------------------|----------------------------------------------------------------------------------------------------------------------------------------------------------------------------|---------|
| SARS-CoV MA15                                       | ORF3a SVPL271–274GMSM<br>E protein DLLV73–76GGGG | 16-week-old BALB/c female mice | 10 <sup>5</sup> PFU  | No mortality, reduced weight loss                                                                                                                                          | [19]    |
| SARS-CoV MA15                                       | ORF3a: S40A S58A                                 | 16-week-old BALB/c female mice | 10 <sup>5</sup> PFU  | Slightly reduced mortality                                                                                                                                                 | [19]    |
| SARS-CoV MA15                                       | ORF3a: Y109A Y113A Q116A                         | 16-week-old BALB/c female mice | 10 <sup>5</sup> PFU  | No mortality, reduced weight loss                                                                                                                                          | [19]    |
| SARS-CoV MA15                                       | ORF3a: Y91A H93A                                 | 16-week-old BALB/c female mice | 10 <sup>5</sup> PFU  | No mortality, reduced weight loss, reduced lung viral titer                                                                                                                | [19]    |
| SJHM-RA59/S4R29<br>MHV-A59 expressing MHV-JHM spike | Spike L1114R                                     | 4-week-old male C57BL/6 mice   | Varied, intranasal   | Increased dose required to cause symptomatic disease, reduced replication and inflammation in brain, replication restricted to olfactory bulb                              | [53]    |
|                                                     |                                                  | 4-week-old male C57BL/6 mice   | Varied, intracranial | Increased dose required to cause symptomatic disease, reduced replication and inflammation in brain, replication restricted to olfactory bulb                              |         |
| SARS-CoV Urbani                                     | Spike T332I                                      | 12-month-old male BALB/c mice  | 10 <sup>5</sup> PFU  | No mortality, reduced weight loss, no lung pathology other than inflammation                                                                                               | [54]    |
| SJHM-RA59/S4R29<br>MHV-A59 expressing MHV-JHM spike | Spike: Q1067H Q1094H L1114R                      | 4-week-old male C57BL/6 mice   | Varied, intranasal   | Increased dose required to cause symptomatic disease, increased LD <sub>50</sub> , reduced replication and inflammation in brain, replication restricted to olfactory bulb | [53,55] |
|                                                     |                                                  | 4-week-old male C57BL/6 mice   | Varied, intracranial | Increased dose required to cause symptomatic disease,                                                                                                                      |         |

|                 |                                     |                                 |                                  |                                                                                                                       |      |
|-----------------|-------------------------------------|---------------------------------|----------------------------------|-----------------------------------------------------------------------------------------------------------------------|------|
|                 |                                     |                                 |                                  | increased LD <sub>50</sub> , reduced replication and inflammation in brain, replication restricted to olfactory bulb, |      |
|                 |                                     | 4-week-old male C57BL/6 mice    | 10 PFU intracranial              | Reduced brain viral titers                                                                                            |      |
|                 |                                     | 4-week-old male C57BL/6 mice    | 5×10 <sup>4</sup> PFU intranasal | Reduced brain viral titer at 3 dpi but increased at 5 dpi                                                             |      |
| SARS-CoV MA15   | TRS replacement (ACGAAC to CCGGAU)  | 10-week-old female BALB/c       | Not specified                    | Reduced mortality                                                                                                     | [56] |
|                 |                                     | 12-month-old female BALB/c mice | Not specified                    | Reduced mortality                                                                                                     |      |
| SARS-CoV Urbani | TRS replacement (ACGAAC to CCGGAU)  | 10-week-old female BALB/c       | Not specified                    | No significant difference                                                                                             | [56] |
|                 |                                     | 12-month-old female BALB/c mice | Not specified                    | No weight loss                                                                                                        |      |
| SARS-CoV MA15   | TRS replacement (ACGAAC to UGGUCGC) | 10-week-old female BALB/c       | Not specified                    | No mortality, reduced lung viral titer                                                                                | [56] |
|                 |                                     | 12-month-old female BALB/c mice | 10 <sup>2</sup> PFU              | No mortality                                                                                                          |      |
|                 |                                     | 12-month-old female BALB/c mice | 10 <sup>3</sup> PFU              | No mortality                                                                                                          |      |
|                 |                                     | 12-month-old female BALB/c mice | 10 <sup>4</sup> PFU              | Reduced mortality                                                                                                     |      |

and encoding a human melanoma Mel-A26-35 epitope and EGFP fusion protein. Data on IFN, TNF, IL-1 and IL-6 cytokines as well as CXCL10 chemokine was selected for presentation.

**Table S2c.** A summary of the results of experiments that aimed to study the reversion to virulence of attenuated coronaviruses *in vitro*.

| <b>Virus</b>                                  | <b>Mutations</b>                           | <b>Corresponding mutations<br/>in SARS-CoV-2</b> | <b>Conditions</b>                                          | <b>Results</b>                                                                                                   | <b>Reference</b> |
|-----------------------------------------------|--------------------------------------------|--------------------------------------------------|------------------------------------------------------------|------------------------------------------------------------------------------------------------------------------|------------------|
| SARS-CoV Urbani                               | ΔEnvelope                                  | ΔEnvelope                                        | 16 passages in Vero E6 cells                               | Spike S607F on passage 5. Minimal lethality after 16 passages.                                                   | [29]             |
| SARS-CoV Urbani with deletion of ORF3-9b      | ΔEnvelope                                  | ΔEnvelope                                        | 16 passages in Vero E6 cells                               | Spike S607F and NSP8 T89I were detected.                                                                         | [29]             |
| MERS-MA30 with deletion of ORF3, 4a, 4b and 5 | ΔEnvelope                                  | ΔEnvelope                                        | 5 passages in complementary cell line expressing E protein | No evidence of recombination with cellular E protein RNA                                                         | [22]             |
| SARS-CoV-2                                    | Codon pair deoptimized region: 20358–21503 | NA                                               | 10 passages in Vero E6 cells                               | No phenotypic change or mutations in codon pair deoptimized sequences                                            | [15]             |
| SARS-CoV-2                                    | Codon pair deoptimized region: 24308–25306 | NA                                               | 10 passages in Vero E6 cells                               | No phenotypic change or mutations in codon pair deoptimized sequences                                            | [15]             |
| MHV-A59                                       | NSP3 N516A                                 | NSP3 N244A                                       | 12 passages in L929 cells                                  | No reversion                                                                                                     | [52]             |
| SARS-CoV MA15                                 | ΔEnvelope                                  | ΔEnvelope                                        | 16 passages in Vero E6 cells                               | Virus gained a new protein with PDM-binding motif. Cell-line specific titer increase but no change in virulence. | [18]             |
| SARS-CoV MA15                                 | ΔEnvelope                                  | ΔEnvelope                                        | 16 passages in DBT-mACE2                                   | Virus gained a new protein with PDM-binding motif. Cell-line specific titer increase but no change in virulence. | [18]             |
| SARS-CoV MA15                                 | Envelope Δ38–45                            | Envelope Δ38–45                                  | 8 or 16 passages in Vero E6 cells                          | No significant changes                                                                                           | [18,26]          |
| SARS-CoV MA15                                 | Envelope Δ46–52                            | Envelope Δ46–52                                  | 8 or 16 passages in Vero E6 cells                          | No significant changes                                                                                           | [18,26]          |
| SARS-CoV MA15                                 | Envelope: S3A, V5L, T9A, T11A              | Envelope: S3A, V5L, T9A, T11A                    | 8 or 16 passages in Vero E6 cells                          | No significant changes                                                                                           | [18,26]          |

|               |                                                                                                                                                         |                        |                                                                                                    |                                                                                                                                                                                          |      |
|---------------|---------------------------------------------------------------------------------------------------------------------------------------------------------|------------------------|----------------------------------------------------------------------------------------------------|------------------------------------------------------------------------------------------------------------------------------------------------------------------------------------------|------|
| SARS-CoV MA15 | Envelope N15A                                                                                                                                           | Envelope N15A          | 24 passages in Vero E6 cells                                                                       | Reversion through A15D mutation at passage 24                                                                                                                                            | [21] |
| MHV-A59       | NSP14 D330A                                                                                                                                             | NSP14 D331A            | 10 passages in Neuro 2a cells                                                                      | No reversion                                                                                                                                                                             | [35] |
| MHV-A59       | NSP14 Y414A                                                                                                                                             | NSP14 Y420A            | 10 passages in Neuro 2a cells                                                                      | No reversion                                                                                                                                                                             | [35] |
| SARS-CoV MA15 | Envelope V25F                                                                                                                                           | Envelope V25F          | 24 passages in Vero E6                                                                             | Incorporation of reverting mutations at passage 8                                                                                                                                        | [21] |
| SARS-CoV MA15 | Envelope DLLV73–76GGGG                                                                                                                                  | Envelope DLLV72–75GGGG | 16 passages in Vero E6 cells                                                                       | The virus gained a novel PDZ-binding motif in E protein                                                                                                                                  | [18] |
| MHV-A59       | NSP14 N380A                                                                                                                                             | NSP14 N386A            | Cell culture                                                                                       | Reversion after 1 passage                                                                                                                                                                | [14] |
| SARS-CoV-2    | Envelope deletion<br>ORF3 deletion<br>TRS replacement<br>(ACGAAC to CCGGAU)                                                                             | -                      | 10 passages in complementary cell line expressing E and ORF3a proteins                             | ΔORF3-E P10 virion replicon was obtained with NSP1 Y97N, NSP4 K35I and Spike P812R mutations. The resultant replicon propagated to a higher infectious titer in complementary cell line. | [12] |
| SARS-CoV-2    | Envelope deletion<br>ORF3 deletion<br>TRS replacement<br>(ACGAAC to CCGGAU)                                                                             | -                      | 5 passages in complementary cell line expressing E and ORF3a proteins, 2 passages in Vero E6 cells | S-IV-P5-Vero-P2 virion with NSP15 A54T, NSP16 D108N, Spike: N679D S689G N709D and Membrane: T130N mutations was obtained. It could be propagated in non-complementary Vero E6 cell line. | [12] |
| SARS-CoV-2    | Envelope deletion<br>ORF3 deletion<br>TRS replacement<br>(ACGAAC to CCGGAU)<br>NSP15 A54T<br>NSP16 D108N<br>Spike: N679D S689G N709D<br>Membrane: T130N | -                      | 10 passages in Vero E6 cells                                                                       | No improved replication                                                                                                                                                                  | [12] |

**Table S2d.** A summary of the results of experiments that aimed to study immunogenicity of attenuated coronaviruses.

| <b>Virus</b>    | <b>Mutations</b>                   | <b>Corresponding mutations in SARS-CoV-2</b> | <b>Animal, route of administration, dose</b>                               | <b>Endpoint</b>                                                                                                      | <b>Result (attenuated/WT)</b>         | <b>Reference</b> |
|-----------------|------------------------------------|----------------------------------------------|----------------------------------------------------------------------------|----------------------------------------------------------------------------------------------------------------------|---------------------------------------|------------------|
| MHV-MelA        | murine GM-CSF gene insertion       | Murine/human GM-CSF gene insertion           | A2DR1 mice, intravenous, 10 <sup>5</sup> PFU                               | Tet-MelA+ CD8+ T cells/spleen at 28 dpi                                                                              | 1,07×10 <sup>5</sup> /ND              | [32]             |
| SARS-CoV MA15   | NSP16 D130A                        | NSP16 D130A                                  | BALB/c mice, Intranasal, 10 <sup>5</sup> PFU                               | SARS-CoV MA15 serum 50% neutralizing titer<br>SHC014-MA15 serum 50% neutralizing titer                               | >1600/ND;<br>>800/ND                  | [45,46]          |
| SARS-CoV Urbani | TRS replacement (ACGAAC to CCGGAU) | TRS replacement (ACGAAC to CCGGAU)           | 10-week-old BALB/c mice, Intranasal, 10 <sup>2</sup> -10 <sup>3</sup> PFU  | SARS-CoV Urbani serum 50% neutralizing titer                                                                         | 4820/ND                               | [56]             |
| SARS-CoV Urbani | TRS replacement (ACGAAC to CCGGAU) | TRS replacement (ACGAAC to CCGGAU)           | 12-month-old BALB/c mice, Intranasal, 10 <sup>2</sup> -10 <sup>3</sup> PFU | SARS-CoV Urbani serum 50% neutralizing titer                                                                         | 6420/ND                               | [56]             |
| SARS-CoV MA15   | ΔEnvelope                          | ΔEnvelope                                    | 6-week-old BALB/c mice, Intranasal, 6×10 <sup>3</sup> PFU                  | SARS-CoV MA15 serum 50% neutralizing titer at 21 and 66 dpi<br>S366 peptide specific lung CD8+ IFN-γ+ cells at 7 dpi | 91 and 648/ND<br>0,8%/ND              | [24]             |
| SARS-CoV MA15   | ΔEnvelope                          | ΔEnvelope                                    | 12-month-old BALB/c mice, Intranasal, 6×10 <sup>3</sup> PFU                | SARS-CoV MA15 serum 50% neutralizing titer at 21 and 66 dpi<br>S366 peptide specific lung CD8+ IFN-γ+ cells at 7 dpi | 198 and 1260/ND<br>3,7%/ND            | [24]             |
| MHV-A59         | NSP14 D330A                        | NSP14 D331A                                  | 4-week-old C57BL/6 mice, subcutaneous, 5×10 <sup>5</sup> PFU               | MHV-A59 serum 50% neutralizing titer at 28 and 336 dpi<br>Virus specific IFN-γ+ CD8+ splenocytes at 28 dpi           | 244 and 67/618 and 251<br>0,79%/0,82% | [35]             |

|              |                               |                                    |                                                                                  |                                                                                                             |                                        |      |
|--------------|-------------------------------|------------------------------------|----------------------------------------------------------------------------------|-------------------------------------------------------------------------------------------------------------|----------------------------------------|------|
| MHV-A59      | NSP14 D330A                   | NSP14 D331A                        | 4-week-old C57BL/6 mice, subcutaneous, 5×10 <sup>5</sup> PFU                     | MHV-A59 serum 50% neutralizing titer at 28 and 336 dpi<br>Virus specific IFN-γ+ CD8+ splenocytes at 28 dpi  | 432 and 126/618 and 251<br>0,95%/0,82% | [35] |
| MERS-CoV EMC | NSP16 D130A                   | NSP16 D130A                        | 10–20-week-old Dpp4 288–330 <sup>+/+</sup> mice, intranasal, 10 <sup>6</sup> PFU | MERS-CoV EMC serum 50%neutralizing titer                                                                    | >800/ND                                | [43] |
| MHV-GP       | murine Flt3L gene insertion   | Murine/human Flt3L gene insertion  | C57BL/6 mice, intravenous, 10 <sup>5</sup> PFU                                   | Tet-gp34+ CD8+ splenocytes at 7 dpi                                                                         | 10,32%/2,69%                           | [31] |
| MHV-GP       | murine GM-CSF gene insertion  | Murine/human GM-CSF gene insertion | C57BL/6 mice, intravenous, 10 <sup>5</sup> PFU                                   | Tet-gp34+ CD8+ splenocytes at 7 dpi                                                                         | 2,79%/1.20%                            | [32] |
| MHV-GP       | murine IL-15 gene insertion   | Murine/human IL-15 gene insertion  | C57BL/6 mice, intravenous, 10 <sup>5</sup> PFU                                   | Tet-gp34+ CD8+ splenocytes at 7 dpi                                                                         | 5,42%/2,69%                            | [31] |
| MHV-GP       | murine IL-2 gene insertion    | Murine/human IL-2 gene insertion   | C57BL/6 mice, intravenous, 10 <sup>5</sup> PFU                                   | Tet-gp34+ CD8+ splenocytes at 7 dpi                                                                         | 5,33%/2,69%                            | [31] |
| MHV-MelA     | murine GM-CSF gene insertion  | Murine/human GM-CSF gene insertion | A2DR1 mice, intravenous, 10 <sup>5</sup> PFU                                     | Tet-MelA+ CD8+ T cells/spleen at 28 dpi                                                                     | 1,07×10 <sup>5</sup> /ND               | [32] |
| SARS-CoV-2   | Cold adaptation               | NA                                 | K18-hACE2 mice, intranasal, 2×10 <sup>4</sup> PFU                                | CoV-2-CNUHV03 serum 50% neutralizing titer at 19 dpi<br>CoV-2-KCDC03 50% serum neutralizing titer at 19 dpi | 640–4960/ND<br>640–4960/ND             | [17] |
| PEDV PC22A   | NSP16: K45A D129A K169A E202A | NSP16: K46A, D130A, K170A, E202A   | 4-days old piglets, oral, 100 PFU                                                | PEDV PC22A serum 50% neutralizing titer at 21 dpi                                                           | 125/ND                                 | [44] |

|                 |                                                                     |           |                                                                                |                                                             |                    |      |
|-----------------|---------------------------------------------------------------------|-----------|--------------------------------------------------------------------------------|-------------------------------------------------------------|--------------------|------|
| SARS-CoV-2      | Codon pair deoptimized region: 24106 - 25378 (nt)<br>Spike Δ678-689 | NA        | 5–6-week-old Syrian hamsters, intranasal, 5×10 <sup>3</sup> PFU                | SARS-CoV-2 serum 50% neutralizing titer at 21 dpi           | 1260/1000          | [11] |
| SARS-CoV-2      | R685H                                                               | NA        | 5–6-week-old Syrian hamsters, intranasal, 1.5×10 <sup>4</sup> PFU              | SARS-CoV-2 serum 50% neutralizing titer at 19 dpi           | 766/766            | [13] |
|                 |                                                                     |           |                                                                                | Lineage P.1 serum 50% neutralizing titer at 19 dpi          | 274/229            |      |
|                 |                                                                     |           |                                                                                | Lineage B.1.1.7 serum 50% neutralizing titer at 19 dpi      | 2550/1560          |      |
| SARS-CoV-2      | Spike Δ683–689                                                      | NA        | 5–6-week-old Syrian hamsters, intranasal, 1.5×10 <sup>4</sup> PFU              | SARS-CoV-2 serum 50% neutralizing titer at 19 dpi           | 1360/766           | [13] |
|                 |                                                                     |           |                                                                                | Lineage P.1 serum 50% neutralizing titer at 19 dpi          | 267/229            |      |
|                 |                                                                     |           |                                                                                | Lineage B.1.1.7 serum 50% neutralizing titer at 19 dpi      | 1710/1560          |      |
| SARS-CoV-2      | Spike Δ681-684                                                      | NA        | Syrian hamsters, intranasal, 5×10 <sup>5</sup> PFU                             | SARS-CoV-2 serum 50% neutralizing titer                     | 637/575            | [10] |
| SARS-CoV-2      | Vero E6 passaged                                                    | NA        | Syrian hamsters, intranasal, 1.25×10 <sup>5</sup> PFU                          | SARS-CoV-2 serum 50% neutralizing titer                     | 243/211            | [6]  |
| SARS-CoV-2      | Vero E6 passaged                                                    | NA        | Ad5-hACE2 transduced 6–8 week-old BALB/c mice; intranasal; 10 <sup>5</sup> PFU | Spike-specific IFN-γ+ CD8+ cells in lungs at 28 dpi         | 0,75%/ND           | [6]  |
| SARS-CoV Urbani | ΔEnvelope                                                           | ΔEnvelope | Syrian hamster, intranasal, 10 <sup>3</sup> TCID <sub>50</sub>                 | SARS-CoV Urbani serum 50% neutralizing titer                | 280/367            | [27] |
|                 |                                                                     |           |                                                                                | SARS-CoV GD03 serum 50% neutralizing titer                  | 52/45              |      |
| SARS-CoV Urbani | ΔEnvelope                                                           | ΔEnvelope | 6-week-old BALB/c mice,                                                        | SARS-CoV MA15 serum 50% neutralizing titer at 21 and 66 dpi | <10/ND and <LOD/ND | [24] |

|                                                        |                        |           |                                                                        |                                                                |                        |      |
|--------------------------------------------------------|------------------------|-----------|------------------------------------------------------------------------|----------------------------------------------------------------|------------------------|------|
|                                                        |                        |           | Intranasal,<br>6×10 <sup>3</sup> PFU                                   | S366 peptide specific lung CD8+ IFN-<br>γ+ cells at 7 dpi      | Very few/ND            |      |
| SARS-CoV<br>Urbani                                     | ΔEnvelope              | ΔEnvelope | 12-month-old<br>BALB/c mice,<br>Intranasal,<br>6×10 <sup>3</sup> PFU   | SARS-CoV MA15 serum 50%<br>neutralizing titer at 21 and 66 dpi | <LOD/ND and<br><LOD/ND | [24] |
|                                                        |                        |           |                                                                        | S366 peptide specific lung CD8+ IFN-<br>γ+ cells at 7 dpi      | 0,03%/ND               |      |
| SARS-CoV<br>Urbani                                     | ΔEnvelope              | ΔEnvelope | 12-month-old<br>BALB/c mice,<br>Intranasal,<br>1.2×10 <sup>4</sup> PFU | SARS-CoV Urbani serum 50%<br>neutralizing titer at 21 dpi      | ≤10/ND                 | [29] |
|                                                        |                        |           |                                                                        | S366 peptide specific blood CD8+ IFN-<br>γ+ cells at 7 dpi     | 1,6%/ND                |      |
| SARS-CoV<br>Urbani                                     | ΔEnvelope              | ΔEnvelope | hACE2-Tg mice,<br>Intranasal;<br>1.2×10 <sup>4</sup> PFU               | SARS-CoV Urbani serum 50%<br>neutralizing titer at 21 dpi      | ≤20/ND                 | [29] |
|                                                        |                        |           |                                                                        | S366 peptide specific blood CD8+ IFN-<br>γ+ cells at 7 dpi     | 2,37%/ND               |      |
| SARS-CoV<br>Urbani with with<br>deletion of<br>ORF3-9b | ΔEnvelope              | ΔEnvelope | 12-month-old<br>BALB/c mice,<br>Intranasal,<br>1.2×10 <sup>4</sup> PFU | SARS-CoV Urbani serum 50%<br>neutralizing titer at 21 dpi      | ≤10/ND                 | [29] |
|                                                        |                        |           |                                                                        | S366 peptide specific blood CD8+ IFN-<br>γ+ cells at 7 dpi     | 1,7%/ND                |      |
| SARS-CoV<br>Urbani with with<br>deletion of<br>ORF3-9b | ΔEnvelope              | ΔEnvelope | hACE2-Tg mice,<br>Intranasal;<br>1.2×10 <sup>4</sup> PFU               | SARS-CoV Urbani serum 50%<br>neutralizing titer at 21 dpi      | ≤20/ND                 | [29] |
|                                                        |                        |           |                                                                        | S366 peptide specific blood CD8+ IFN-<br>γ+ cells at 7 dpi     | 1,3%/ND                |      |
| MERS-MA30<br>with deletion of<br>ORF3, 4a, 4b and<br>5 | ΔEnvelope              | ΔEnvelope | 16–24-week-old<br>hDPP4-KI mice,<br>Intranasal, 10 <sup>4</sup> FFU    | MERS-CoV MA30 serum 50%<br>neutralizing titer                  | 56,1/ND                | [22] |
| SARS-CoV-2                                             | Spike: Δ679–686, V687I | NA        | 16–20-week-old<br>ferrets, intranasal,<br>10 <sup>5</sup> PFU          | SARS-CoV-2 serum 50% neutralizing<br>titer                     | 40-80/10-80            | [8]  |

**Table S2e.** A summary of the results of the challenge studies.

| Parental (WT) virus     | Mutations/virus name                  | Model                                    | Vaccine virus dose, vaccination route (if not intranasal) | Vaccination-challenge interval (days) | Challenge virus, dose, route                                | Difference in infection outcome                                                                                                                                                                                              | References |
|-------------------------|---------------------------------------|------------------------------------------|-----------------------------------------------------------|---------------------------------------|-------------------------------------------------------------|------------------------------------------------------------------------------------------------------------------------------------------------------------------------------------------------------------------------------|------------|
| SARS-CoV-2 HK-13        | Ca-DelMut                             | 7–8-week-old golden Syrian hamsters      | 1.25×10 <sup>5</sup> PFU                                  | 28                                    | SARS-CoV-2 HK-13 and HK-95, 10 <sup>3</sup> PFU             | Highly reduced weight loss, highly reduced lung pathology                                                                                                                                                                    | [6]        |
| SARS-CoV-2 WK-521       | Spike Δ683–689                        | 4–6-week-old male golden Syrian hamsters | 1.5×10 <sup>4</sup> PFU                                   | 19                                    | SARS-CoV-2 WK-521, 1.5×10 <sup>4</sup> PFU                  | No weight loss, no macroscopic lung pathology, reduced viral load in lungs and nasal turbinates, no virus in nasal turbinates and lungs at 5 dpi, increased IFN-γ expression in lungs and decreased IL-6 expression in lungs | [13]       |
|                         |                                       | 4–6-week-old male golden Syrian hamsters | 1.5×10 <sup>4</sup> PFU                                   | 19                                    | SARS-CoV-2 TY7-501 (lineage P.1), 1.5×10 <sup>4</sup> PFU   | No weight loss, no macroscopic lung pathology, reduced viral load in lungs and nasal turbinates, low viral titers in nasal turbinates at 5 dpi, virus not present in lungs at 5 dpi, decreased IL-6 expression in lungs      |            |
|                         |                                       | 4–6-week-old male golden Syrian hamsters | 1.5×10 <sup>4</sup> PFU                                   | 19                                    | SARS-CoV-2 QK002 (lineage B.1.1.7), 1.5×10 <sup>4</sup> PFU | No weight loss, no macroscopic lung pathology, reduced viral load in lungs and nasal turbinates, low viral titers in nasal turbinates at 5 dpi, no virus in lungs at 5 dpi,                                                  |            |
| SARS-CoV-2 WK-521       | Spike R685H                           | 4–6-week-old male golden Syrian hamsters | 1.5×10 <sup>4</sup> PFU                                   | 19                                    | SARS-CoV-2 WK-521, 1.5×10 <sup>4</sup> PFU                  | No weight loss, no macroscopic lung pathology, reduced viral load in lungs and nasal turbinates, no virus in nasal turbinates and lungs at 5 dpi, increased IFN-γ expression in lungs and decreased IL-6 expression in lungs | [13]       |
| SARS-CoV-2 USA-WA1/2020 | Codon pair deoptimized region: 24106– | 5–6-week-old male golden Syrian hamsters | 5×10 <sup>4</sup> PFU                                     | 16                                    | SARS-CoV-2 USA-WA1/2020, 5×10 <sup>4</sup> PFU              | Reduced lung viral titer, reduced viral titer in olfactory bulb, no neuroinfection, no significant weight loss                                                                                                               | [11]       |

|                                     |                                                 |                                          |                       |             |                                                                                    |                                                                                                                                                         |         |
|-------------------------------------|-------------------------------------------------|------------------------------------------|-----------------------|-------------|------------------------------------------------------------------------------------|---------------------------------------------------------------------------------------------------------------------------------------------------------|---------|
| 25378 (nt)<br>Spike Δ678-689        |                                                 |                                          |                       |             |                                                                                    |                                                                                                                                                         |         |
| SARS-CoV-2 Wuhan-Hu-1/2019          | NSP14 Y420A                                     | 8-week-old K18-hACE2 mice                | 10 <sup>4</sup> PFU   | Unspecified | SARS-CoV-2 Wuhan-Hu-1/2019, 5×10 <sup>4</sup> PFU                                  | No mortality, no significant weight loss                                                                                                                | [14]    |
| SARS-CoV-2/human/Korea/CNUHV03/2020 | CoV-2-CNUHV03-CA22°C                            | 5–6-week-old female K18-hAC2 mice        | 2×10 <sup>3</sup> PFU | 21          | SARS-CoV-2- KCDC03, 2×10 <sup>4</sup> PFU                                          | No apparent weight loss, mild pneumonia, no detectable virus at 6 dpi                                                                                   | [17]    |
|                                     |                                                 |                                          | 2×10 <sup>4</sup> PFU | 21          | SARS-CoV-2- KCDC03, 2×10 <sup>4</sup> PFU                                          | No apparent weight loss, no pneumonia, no detectable virus at 6 dpi                                                                                     |         |
| SARS-CoV-2 USA-WA1/2020             | Spike Δ681-684                                  | 7–8 week-old male golden Syrian hamsters | 10 <sup>5</sup> PFU   | 28          | SARS-CoV-2 USA-WA1/2020, 10 <sup>5</sup> PFU                                       | No weight loss, no signs of disease, no virus detectable in nasal wash at 4 dpi                                                                         | [10]    |
| SARS-CoV-2 Wuhan-Hu-1/2019          | Codon pair deoptimized region: 24308–25306 (nt) | 6-week-old golden Syrian hamsters        | 10 <sup>4</sup> FFU   | 21          | SARS-CoV-2 lineage B.1, 10 <sup>5</sup> FFU                                        | No weight loss, no signs of disease, reduced lung pathology and inflammation, reduced viral loads, no live virus present in lungs at 2-5 dpi            | [15]    |
| SARS-CoV-2 Wuhan-Hu-1/2019          | Codon pair deoptimized region: 20358–21503 (nt) | 6-week-old golden Syrian hamsters        | 10 <sup>4</sup> FFU   | 21          | SARS-CoV-2 lineage B.1, 10 <sup>5</sup> FFU                                        | No weight loss, no signs of disease, reduced lung pathology and inflammation, reduced viral loads, no live virus present in lungs at 2-5 dpi            | [15,16] |
|                                     |                                                 | 5–7-week-old Roborovski dwarf hamsters   | 10 <sup>5</sup> FFU   | 21          | BetaCoV/Munich/BavPat1/2020 (B.1 lineage), 10 <sup>5</sup> PFU                     | No weight loss, no signs of disease, no lung pathology and inflammation, reduced viral loads, no live virus present in lungs at 2-5 dpi                 |         |
|                                     |                                                 |                                          |                       |             | BetaCoV/Germany/ChVir21652/2020 (B.1.1.7 lineage), 10 <sup>5</sup> PFU             | No weight loss, no signs of disease, no lung pathology and inflammation, reduced viral loads, no live virus present in lungs at 2-5 dpi                 |         |
|                                     |                                                 |                                          |                       |             | hCoV-19/Netherlands/NoordHolland_20159/2021 (B.1.351 lineage), 10 <sup>5</sup> PFU | No weight loss, no signs of disease, no lung pathology and inflammation, reduced viral loads, no live virus present in lungs at 2-5 dpi in most animals |         |

|                                                             |                                                               |                                   |                                    |    |                                                     |                                                                                                                                                    |            |
|-------------------------------------------------------------|---------------------------------------------------------------|-----------------------------------|------------------------------------|----|-----------------------------------------------------|----------------------------------------------------------------------------------------------------------------------------------------------------|------------|
| SARS-CoV-2 Wuhan-Hu-1/2019                                  | Codon pair deoptimized regions: 11969–13450; 13953–14306 (nt) | 6 week-old golden Syrian hamsters | 10 <sup>5</sup> FFU                | 21 | SARS-CoV-2 lineage B.1, 10 <sup>5</sup> FFU         | No weight loss, no signs of disease, reduced lung pathology and inflammation, reduced viral loads, no live virus present in lungs at 2-5 dpi       | [15]       |
| MERS-MA30-Δ5 (MERS-MA30 with ORF5 deletion)                 | Envelope protein deletion                                     | 16–24-week-old hDPP4-KI mice      | 10 <sup>4</sup> FFU                | 21 | MERS-MA30, 10 <sup>5</sup> FFU                      | No mortality, no weight loss, reduced viral loads, no live virus in lungs at 2-6 dpi                                                               | [22]       |
| rMERS-MA30-Δ[3, 4a, 4b, 5] (MERS-MA30 with ORF3-5 deletion) | Envelope protein deletion                                     | 16–24-week-old hDPP4-KI mice      | 10 <sup>4</sup> FFU                | 21 | MERS-MA30, 10 <sup>5</sup> FFU                      | No mortality, no significant weight loss                                                                                                           | [22]       |
| MERS-MA30                                                   | Envelope protein deletion                                     | 16–24-week-old hDPP4-KI mice      | 10 <sup>4</sup> FFU                | 21 | MERS-MA30, 10 <sup>5</sup> FFU                      | No mortality, no significant weight loss                                                                                                           | [22]       |
| MERS-CoV EMC                                                | Envelope protein deletion                                     | 16–24-week-old K18-hDPP4 mice     | 5×10 <sup>3</sup> FFU              | 21 | MERS-CoV EMC, 5×10 <sup>4</sup> FFU                 | No weight loss, no mortality                                                                                                                       | [22]       |
| SARS-CoV Urbani                                             | Envelope protein deletion                                     | Golden Syrian hamsters            | 10 <sup>3</sup> TCID <sub>50</sub> | 28 | SARS-CoV Urbani, 10 <sup>3</sup> TCID <sub>50</sub> | Reduced lung inflammation, smaller reduction in animal activity, no live virus in lungs at 2 and 5 dpi, no live virus in nasal turbinates at 5 dpi | [24,27–30] |
|                                                             |                                                               | 6-week-old BALB/c mice            | 6×10 <sup>3</sup> PFU              | 21 | SARS-CoV MA15, 10 <sup>5</sup> PFU                  | No mortality, reduced weight loss,                                                                                                                 |            |
|                                                             |                                                               | 12-month-old BALB/c mice          | 6×10 <sup>3</sup> PFU              | 21 | SARS-CoV MA15, 10 <sup>5</sup> PFU                  | Reduced mortality                                                                                                                                  |            |
|                                                             |                                                               | 6-week-old BALB/c mice            | 6×10 <sup>3</sup> PFU              | 66 | SARS-CoV MA15, 10 <sup>5</sup> PFU                  | No difference                                                                                                                                      |            |
|                                                             |                                                               | 12-month-old BALB/c mice          | 6×10 <sup>3</sup> PFU              | 66 | SARS-CoV MA15, 10 <sup>5</sup> PFU                  | No difference except small decrease in lung viral titer                                                                                            |            |
|                                                             |                                                               | 6–8-week-old BALB/c mice          | 1.2×10 <sup>4</sup> PFU            | 21 | SARS-CoV MA15, 10 <sup>5</sup> PFU                  | No mortality, reduced weight loss, reduced lung pathology                                                                                          |            |
|                                                             |                                                               | hACE2-Tg mice                     | 1.2×10 <sup>4</sup> PFU            | 21 | SARS-CoV Urbani, 1.2×10 <sup>4</sup> PFU            | Reduced mortality                                                                                                                                  |            |
|                                                             |                                                               |                                   |                                    |    |                                                     |                                                                                                                                                    |            |

**References:**

|                                                                                       |                                           |                                  |                                       |    |                                                 |                                                                                                                                          |      |
|---------------------------------------------------------------------------------------|-------------------------------------------|----------------------------------|---------------------------------------|----|-------------------------------------------------|------------------------------------------------------------------------------------------------------------------------------------------|------|
| rSARS-CoV-Urbani-<br>$\Delta$ [6–9b]<br>(SARS-CoV Urbani<br>with ORF6–9b<br>deletion) | Envelope<br>protein deletion              | 6–8-week-old<br>BALB/c mice      | 1.2×10 <sup>4</sup> PFU               | 21 | SARS-CoV MA15, 10 <sup>5</sup><br>PFU           | No mortality, reduced weight loss,<br>reduced lung pathology                                                                             | [29] |
|                                                                                       |                                           | hACE2-Tg mice                    | 1.2×10 <sup>4</sup> PFU               | 21 | SARS-CoV Urbani,<br>1.2×10 <sup>4</sup> PFU     | Reduced mortality                                                                                                                        |      |
| SARS-CoV MA15                                                                         | Envelope<br>protein deletion              | 6-week-old BALB/c<br>mice        | 6×10 <sup>3</sup> PFU                 | 21 | SARS-CoV MA15, 10 <sup>5</sup><br>PFU           | No mortality, no weight loss, reduced<br>viral titer, no detectable virus at 4 dpi                                                       | [24] |
|                                                                                       |                                           | 12-month-old<br>BALB/c mice      | 6×10 <sup>3</sup> PFU                 | 21 | SARS-CoV MA15, 10 <sup>5</sup><br>PFU           | No mortality, no weight loss, reduced<br>viral titer, no detectable virus at 4 dpi,<br>highly reduced lung pathology and<br>inflammation |      |
|                                                                                       |                                           | 18-month-old<br>BALB/c mice      | 6×10 <sup>3</sup> PFU                 | 21 | SARS-CoV MA15, 10 <sup>5</sup><br>PFU           | No mortality or weight loss                                                                                                              |      |
|                                                                                       |                                           | 6-week-old BALB/c<br>mice        | 6×10 <sup>3</sup> PFU                 | 66 | SARS-CoV MA15, 10 <sup>5</sup><br>PFU           | No weight loss, reduced lung viral titer,<br>no detectable virus at 4 dpi, reduced<br>lung inflammation and pathology                    |      |
|                                                                                       |                                           | 12-month-old<br>BALB/c mice      | 6×10 <sup>3</sup> PFU                 | 66 | SARS-CoV MA15, 10 <sup>5</sup><br>PFU           | No weight loss, reduced lung viral titer,<br>no detectable virus at 4 dpi, reduced<br>lung inflammation and pathology                    |      |
| SARS-CoV MA15                                                                         | Envelope $\Delta$ 38–<br>45               | 6-week-old BALB/c<br>mice        | 6×10 <sup>3</sup> PFU                 | 21 | SARS-CoV MA15, 10 <sup>5</sup><br>PFU           | No mortality, no weight loss                                                                                                             | [26] |
| SARS-CoV MA15                                                                         | Envelope $\Delta$ 46–<br>52               | 6-week-old BALB/c<br>mice        | 6×10 <sup>3</sup> PFU                 | 21 | SARS-CoV MA15, 10 <sup>5</sup><br>PFU           | No mortality, no weight loss                                                                                                             | [26] |
| SARS-CoV MA15                                                                         | Envelope:<br>S3A,<br>V5L,<br>T9A,<br>T11A | 6-week-old BALB/c<br>mice        | 6×10 <sup>3</sup> PFU                 | 21 | SARS-CoV MA15, 10 <sup>5</sup><br>PFU           | No mortality, no weight loss                                                                                                             | [26] |
| SARS-CoV MA15                                                                         | NSP1 $\Delta$ 122–130                     | 8-week-old female<br>BALB/c mice | 6×10 <sup>3</sup> PFU                 | 21 | SARS-CoV MA15, 10 <sup>5</sup><br>PFU           | No mortality, no weight loss                                                                                                             | [18] |
| MHV-A59                                                                               | NSP14 D330A                               | 4-week-old male<br>C57BL/6 mice  | 5×10 <sup>5</sup> PFU<br>subcutaneous | 30 | MHV-A59, 2×10 <sup>7</sup> PFU,<br>intrahepatic | No mortality, no weight loss, no liver<br>pathology, smaller serum ALT increase                                                          | [29] |

|                 |                                     |                                                 |                                       |    |                                                                             |                                                                                                 |         |
|-----------------|-------------------------------------|-------------------------------------------------|---------------------------------------|----|-----------------------------------------------------------------------------|-------------------------------------------------------------------------------------------------|---------|
| MHV-A59         | NSP14 Y414A                         | 4-week-old male C57BL/6 mice                    | 5×10 <sup>5</sup> PFU subcutaneous    | 30 | MHV-A59, 2×10 <sup>7</sup> PFU, intrahepatic                                | No mortality, no weight loss, no liver pathology, smaller serum ALT increase                    | [29]    |
| MHV-A59         | NSP15 H262A                         | 6-week-old C57BL/6 mice                         | 6×10 <sup>4</sup> PFU intraperitoneal | 30 | MHV-A59, 6×10 <sup>4</sup> PFU, intraperitoneal                             | No liver pathology, no detectable virus in liver or spleen                                      | [39]    |
| MERS-CoV EMC    | NSP16 D130A                         | 10–20-week-old Dpp4 288–330 <sup>+/+</sup> mice | 10 <sup>6</sup> PFU                   | 28 | MERS-CoV MA1, 10 <sup>6</sup> PFU                                           | No mortality, reduced weight loss, reduced lung viral titers, no lung pathology in most animals | [43]    |
| SARS-CoV MA15   | NSP16 D130A                         | 10-week-old BALB/c mice                         | 10 <sup>5</sup> PFU                   | 28 | SARS-CoV MA15, 10 <sup>5</sup> PFU                                          | No mortality, reduced weight loss                                                               | [45,46] |
|                 |                                     | 10-week-old BALB/c mice                         | 10 <sup>5</sup> PFU                   | 28 | SARS-CoV MA15 expressing SHC014-CoV-derived spike gene, 10 <sup>5</sup> PFU | No weight loss, no lung pathology, no live virus in lungs at 4 dpi                              |         |
|                 |                                     | 12-month-old BALB/c mice                        | 100 PFU                               | 28 | SARS-CoV MA15, 10 <sup>5</sup> PFU                                          | No mortality, no viral replication                                                              |         |
| PEDV PC22A      | NSP16: K45A D129A K169A E202A       | 4-days-old piglets                              | 100 PFU, oral                         | 21 | PEDV icPC22A, 10 <sup>6</sup> PFU, oral                                     | No mortality, most animals were protected from symptoms                                         | [44]    |
| SARS-CoV Urbani | TRS replacement (ACGAAC to CCGGAU)  | 10-week-old female BALB/c                       | 10 <sup>2</sup> –10 <sup>3</sup> PFU  | 22 | SARS-CoV MA15, 10 <sup>6</sup> PFU                                          | No weight loss, virus not detectable in lungs at 4 dpi                                          | [56]    |
|                 |                                     | 10-week-old female BALB/c                       | 10 <sup>2</sup> –10 <sup>3</sup> PFU  | 22 | SARS-CoV expressing HCSZ6103 spike, 10 <sup>6</sup> PFU                     | Virus not detectable in lungs at 4 dpi                                                          |         |
|                 |                                     | 12-month-old female BALB/c mice                 | 10 <sup>2</sup> –10 <sup>3</sup> PFU  | 22 | SARS-CoV MA15, 10 <sup>6</sup> PFU                                          | No weight loss, virus not detectable in lungs at 4 dpi                                          |         |
|                 |                                     | 12-month-old female BALB/c mice                 | 10 <sup>2</sup> –10 <sup>3</sup> PFU  | 22 | SARS-CoV expressing HCSZ6103 spike, 10 <sup>6</sup> PFU                     | No weight loss, virus not detectable in lungs at 4 dpi                                          |         |
| SARS-CoV MA15   | TRS replacement (ACGAAC to UGGUCGC) | 12-month-old female BALB/c mice                 | 3,16×10 <sup>2</sup> PFU              | 22 | SARS-CoV MA15, 10 <sup>5</sup> PFU                                          | No mortality, no significant weight loss                                                        | [56]    |

1. Suzuki, R.; Yamasoba, D.; Kimura, I.; Wang, L.; Kishimoto, M.; Ito, J.; Morioka, Y.; Nao, N.; Nasser, H.; Uriu, K.; et al. Attenuated fusogenicity and pathogenicity of SARS-CoV-2 Omicron variant. *Nature* **2022**, *603*, 700–705. <https://doi.org/10.1038/s41586-022-04462-1>.
2. Halfmann, P. J.; Iida, S.; Iwatsuki-Horimoto, K.; Maemura, T.; Kiso, M.; Scheaffer, S. M.; Darling, T. L.; Joshi, A.; Loeber, S.; Singh, G.; et al. SARS-CoV-2 Omicron virus causes attenuated disease in mice and hamsters. *Nature* **2022**, *603*, 687–692. <https://doi.org/10.1038/s41586-022-04441-6>.
3. Shuai, H.; Chan, J. F.-W.; Hu, B.; Chai, Y.; Yuen, T. T.-T.; Yin, F.; Huang, X.; Yoon, C.; Hu, J.-C.; Liu, H.; et al. Attenuated replication and pathogenicity of SARS-CoV-2 B.1.1.529 Omicron. *Nature* **2022**, *603*, 693–699. <https://doi.org/10.1038/s41586-022-04442-5>.
4. Caccuri, F.; Zani, A.; Messali, S.; Giovanetti, M.; Bugatti, A.; Campisi, G.; Filippini, F.; Scaltriti, E.; Ciccozzi, M.; Fiorentini, S.; et al. A persistently replicating SARS-CoV-2 variant derived from an asymptomatic individual. *Journal of Translational Medicine* **2020**, *18*, 362. <https://doi.org/10.1186/s12967-020-02535-1>.
5. Lau, S.-Y.; Wang, P.; Mok, B. W.-Y.; Zhang, A. J.; Chu, H.; Lee, A. C.-Y.; Deng, S.; Chen, P.; Chan, K.-H.; Song, W.; et al. Attenuated SARS-CoV-2 variants with deletions at the S1/S2 junction. *Emerging Microbes & Infections* **2020**, *9*, 837–842. <https://doi.org/10.1080/22221751.2020.1756700>.
6. Wang, P.; Lau, S.-Y.; Deng, S.; Chen, P.; Mok, B. W.-Y.; Zhang, A. J.; Lee, A. C.-Y.; Chan, K.-H.; Tam, R. C.-Y.; Xu, H.; et al. Characterization of an attenuated SARS-CoV-2 variant with a deletion at the S1/S2 junction of the spike protein. *Nature Communications* **2021**, *12*, 2790.
7. Zhu, Y.; Feng, F.; Hu, G.; Wang, Y.; Yu, Y.; Zhu, Y.; Xu, W.; Cai, X.; Sun, Z.; Han, W.; et al. A genome-wide CRISPR screen identifies host factors that regulate SARS-CoV-2 entry. *Nature Communications* **2021**, *12*, 961. <https://doi.org/10.1038/s41467-021-21213-4>.
8. Peacock, T. P.; Goldhill, D. H.; Zhou, J.; Baillon, L.; Frise, R.; Swann, O. C.; Kugathasan, R.; Penn, R.; Brown, J. C.; Sanchez-David, R. Y.; et al. The furin cleavage site in the SARS-CoV-2 spike protein is required for transmission in ferrets. *Nature Microbiology* **2021**, *6*, 899–909. <https://doi.org/10.1038/s41564-021-00908-w>.
9. Silvas, J. A.; Vasquez, D. M.; Park, J.-G.; Chiem, K.; Allué-Guardia, A.; Garcia-Vilanova, A.; Platt, R. N.; Miorin, L.; Kehrer, T.; Cupic, A.; et al. Contribution of SARS-CoV-2 Accessory Proteins to Viral Pathogenicity in K18 Human ACE2 Transgenic Mice. *Journal of Virology* **2021**, *95*, e00402-21. <https://doi.org/10.1128/JVI.00402-21>.
10. Johnson, B. A.; Xie, X.; Bailey, A. L.; Kalveram, B.; Lokugamage, K. G.; Muruato, A.; Zou, J.; Zhang, X.; Juelich, T.; Smith, J. K.; et al. Loss of furin cleavage site attenuates SARS-CoV-2 pathogenesis. *Nature* **2021**, *591*, 293–299. <https://doi.org/10.1038/s41586-021-03237-4>.
11. Wang, Y.; Yang, C.; Song, Y.; Coleman, J. R.; Stawowczyk, M.; Tafrova, J.; Tasker, S.; Boltz, D.; Baker, R.; Garcia, L.; et al. Scalable live-attenuated SARS-CoV-2 vaccine candidate demonstrates preclinical safety and efficacy. *Proc. Natl. Acad. Sci. U.S.A.* **2021**, *118*, e2102775118. <https://doi.org/10.1073/pnas.2102775118>.
12. Zhang, X.; Liu, Y.; Liu, J.; Bailey, A. L.; Plante, K. S.; Plante, J. A.; Zou, J.; Xia, H.; Bopp, N. E.; Aguilar, P. v.; et al. A trans-complementation system for SARS-CoV-2 recapitulates authentic viral replication without virulence. *Cell* **2021**, *184*, 2229–2238.e13. <https://doi.org/10.1016/j.cell.2021.02.044>.
13. Sasaki, M.; Toba, S.; Itakura, Y.; Chambaro, H. M.; Kishimoto, M.; Tabata, K.; Intaruck, K.; Uemura, K.; Sanaki, T.; Sato, A.; et al. SARS-CoV-2 Bearing a Mutation at the S1/S2 Cleavage Site Exhibits Attenuated Virulence and Confers Protective Immunity. *mBio* **2021**, *12*, e01415–21. <https://doi.org/10.1128/mBio.01415-21>.
14. Pan, R.; Kindler, E.; Cao, L.; Zhou, Y.; Zhang, Z.; Liu, Q.; Ebert, N.; Züst, R.; Sun, Y.; Gorbalenya, A.E.; et al. N7-Methylation of the Coronavirus RNA Cap Is Required for Maximal Virulence by Preventing Innate Immune Recognition. *mBio* **2022**, *13*, e0366221. <https://doi.org/10.1128/mbio.03662-21>.
15. Trimpert, J.; Dietert, K.; Firsching, T. C.; Ebert, N.; Thi Nhu Thao, T.; Vladimirova, D.; Kaufer, S.; Labroussaa, F.; Abdelgawad, A.; Conradie, A.; et al. Development of safe and highly protective live-attenuated SARS-CoV-2 vaccine candidates by genome recoding. *Cell Reports* **2021**, *36*, 109493. <https://doi.org/10.1016/j.celrep.2021.109493>.
16. Trimpert, J.; Adler, J. M.; Eschke, K.; Abdelgawad, A.; Firsching, T. C.; Ebert, N.; Thao, T. T. N.; Gruber, A. D.; Thiel, V.; Osterrieder, N.; et al. Live attenuated virus vaccine protects against SARS-CoV-2 variants of concern B.1.1.7 (Alpha) and B.1.351 (Beta). *Science Advances* **2021**, *7*, eabk0172. <https://doi.org/10.1126/sciadv.abk0172>.
17. Seo, S.; Jang, Y. Cold-Adapted Live Attenuated SARS-Cov-2 Vaccine Completely Protects Human ACE2 Transgenic Mice from SARS-Cov-2 Infection. *Vaccines* **2020**, *8*, 584. <https://doi.org/10.3390/vaccines8040584>.
18. Jimenez-Guardeño, J. M.; Regla-Nava, J. A.; Nieto-Torres, J. L.; DeDiego, M. L.; Castaño-Rodriguez, C.; Fernandez-Delgado, R.; Perlman, S.; Enjuanes, L. Identification of the Mechanisms Causing Reversion to Virulence in an Attenuated SARS-CoV for the Design of a Genetically Stable Vaccine. *PLoS Pathogens* **2015**, *11*, e1005215. <https://doi.org/10.1371/journal.ppat.1005215>.

19. Castaño-Rodriguez, C.; Honrubia, J.M.; Gutiérrez-Álvarez, J.; DeDiego, M.L.; Nieto-Torres, J.L.; Jimenez-Guardeño, J.M.; Regla-Nava, J.A.; Fernandez-Delgado, R.; Verdia-Báguena, C.; Queralt-Martín, M.; et al. Role of Severe Acute Respiratory Syndrome Coronavirus Viroporins E, 3a, and 8a in Replication and Pathogenesis. *mBio* **2018**, *9*. <https://doi.org/10.1128/mbio.02325-17>.
20. Jimenez-Guardeño, J.M.; Nieto-Torres, J.L.; DeDiego, M.L.; Regla-Nava, J.A.; Fernandez-Delgado, R.; Castaño-Rodriguez, C.; Enjuanes, L. The PDZ-Binding Motif of Severe Acute Respiratory Syndrome Coronavirus Envelope Protein Is a Determinant of Viral Pathogenesis. *PLOS Pathog.* **2014**, *10*, e1004320. <https://doi.org/10.1371/journal.ppat.1004320>.
21. Nieto-Torres, J. L.; DeDiego, M. L.; Verdiá-Báguena, C.; Jimenez-Guardeño, J. M.; Regla-Nava, J. A.; Fernandez-Delgado, R.; Castaño-Rodriguez, C.; Alcaraz, A.; Torres, J.; Aguilera, V. M.; et al. Severe Acute Respiratory Syndrome Coronavirus Envelope Protein Ion Channel Activity Promotes Virus Fitness and Pathogenesis. *PLoS Pathogens* **2014**, *10*, e1004077. <https://doi.org/10.1371/journal.ppat.1004077>.
22. Gutiérrez-Álvarez, J.; Honrubia, J.M.; Sanz-Bravo, A.; González-Miranda, E.; Fernández-Delgado, R.; Rejas, M.T.; Zúñiga, S.; Sola, I.; Enjuanes, L. Middle East respiratory syndrome coronavirus vaccine based on a propagation-defective RNA replicon elicited sterilizing immunity in mice. *Proc. Natl. Acad. Sci. U.S.A.* **2021**, *118*. <https://doi.org/10.1073/pnas.2111075118>.
23. DeDiego, M. L.; Pewe, L.; Alvarez, E.; Rejas, M. T.; Perlman, S.; Enjuanes, L. Pathogenicity of severe acute respiratory coronavirus deletion mutants in hACE-2 transgenic mice. *Virology* **2008**, *376*, 379–389. <https://doi.org/10.1016/j.virol.2008.03.005>.
24. Fett, C.; DeDiego, M.L.; Regla-Nava, J.A.; Enjuanes, L.; Perlman, S. Complete Protection against Severe Acute Respiratory Syndrome Coronavirus-Mediated Lethal Respiratory Disease in Aged Mice by Immunization with a Mouse-Adapted Virus Lacking E Protein. *J. Virol.* **2013**, *87*, 6551–6559. <https://doi.org/10.1128/jvi.00087-13>.
25. DeDiego, M.L.; Nieto-Torres, J.L.; Regla-Nava, J.A.; Jimenez-Guardeño, J.M.; Fernandez-Delgado, R.; Fett, C.; Castaño-Rodriguez, C.; Perlman, S.; Enjuanes, L. Inhibition of NF-κB-Mediated Inflammation in Severe Acute Respiratory Syndrome Coronavirus-Infected Mice Increases Survival. *J. Virol.* **2014**, *88*, 913–924. <https://doi.org/10.1128/jvi.02576-13>.
26. Regla-Nava, J.A.; Nieto-Torres, J.L.; Jimenez-Guardeño, J.M.; Fernandez-Delgado, R.; Fett, C.; Castaño-Rodríguez, C.; Perlman, S.; Enjuanes, L.; DeDiego, M.L. Severe Acute Respiratory Syndrome Coronaviruses with Mutations in the E Protein Are Attenuated and Promising Vaccine Candidates. *J. Virol.* **2015**, *89*, 3870–3887. <https://doi.org/10.1128/jvi.03566-14>.
27. Lamirande, E.W.; DeDiego, M.L.; Roberts, A.; Jackson, J.P.; Alvarez, E.; Sheahan, T.; Shieh, W.-J.; Zaki, S.R.; Baric, R.; Enjuanes, L.; et al. A Live Attenuated Severe Acute Respiratory Syndrome Coronavirus Is Immunogenic and Efficacious in Golden Syrian Hamsters. *J. Virol.* **2008**, *82*, 7721–7724. <https://doi.org/10.1128/jvi.00304-08>.
28. DeDiego, M.L.; Álvarez, E.; Almazán, F.; Rejas, M.T.; Lamirande, E.; Roberts, A.; Shieh, W.-J.; Zaki, S.R.; Subbarao, K.; Enjuanes, L. A Severe Acute Respiratory Syndrome Coronavirus That Lacks the E Gene Is Attenuated In Vitro and In Vivo. *J. Virol.* **2007**, *81*, 1701–1713. <https://doi.org/10.1128/jvi.01467-06>.
29. Netland, J.; DeDiego, M.L.; Zhao, J.; Fett, C.; Álvarez, E.; Nieto-Torres, J.L.; Enjuanes, L.; Perlman, S. Immunization with an attenuated severe acute respiratory syndrome coronavirus deleted in E protein protects against lethal respiratory disease. *Virology* **2010**, *399*, 120–128. <https://doi.org/10.1016/j.virol.2010.01.004>.
30. Enjuanes, L.; Nieto-Torres, J.L.; Jimenez-Guardeño, J.M.; DeDiego, M.L. Recombinant Live Vaccines to Protect Against the Severe Acute Respiratory Syndrome Coronavirus. **2010**, 73–97. [https://doi.org/10.1007/978-3-0346-0277-8\\_4](https://doi.org/10.1007/978-3-0346-0277-8_4).
31. Perez-Shibayama, C.; Gil-Cruz, C.; Nussbacher, M.; Allgäuer, E.; Cervantes-Barragan, L.; Züst, R.; Ludewig, B. Dendritic Cell-Specific Delivery of Flt3L by Coronavirus Vectors Secures Induction of Therapeutic Antitumor Immunity. *PLoS ONE* **2013**, *8*, e81442. <https://doi.org/10.1371/journal.pone.0081442>.
32. Cervantes-Barragan, L.; Züst, R.; Maier, R.; Sierro, S.; Janda, J.; Levy, F.; Speiser, D.; Romero, P.; Rohrlisch, P. S.; Ludewig, B.; et al. Dendritic cell-specific antigen delivery by coronavirus vaccine vectors induces long-lasting protective antiviral and antitumor immunity. *mBio* **2010**, *1*, e00171-10. <https://doi.org/10.1128/mBio.00171-10>.
33. Zhang, R.; Li, Y.; Cowley, T.J.; Steinbrenner, A.; Phillips, J.M.; Yount, B.L.; Baric, R.S.; Weiss, S.R. The nsp1, nsp13, and M Proteins Contribute to the Hepatotropism of Murine Coronavirus JHM.WU. *J. Virol.* **2015**, *89*, 3598–3609. <https://doi.org/10.1128/jvi.03535-14>.
34. Agostini, M.L.; Andres, E.L.; Sims, A.C.; Graham, R.L.; Sheahan, T.P.; Lu, X.; Smith, E.C.; Case, J.B.; Feng, J.Y.; Jordan, R.; et al. Coronavirus Susceptibility to the Antiviral Remdesivir (GS-5734) Is Mediated by the Viral Polymerase and the Proofreading Exoribonuclease. *mBio* **2018**, *9*, e00221-18. <https://doi.org/10.1128/mbio.00221-18>.

35. Zhang, Z.; Liu, Q.; Sun, Y.; Li, J.; Liu, J.; Pan, R.; Cao, L.; Chen, X.; Li, Y.; Xu, K.; et al. Live attenuated coronavirus vaccines deficient in N7-Methyltransferase activity induce both humoral and cellular immune responses in mice. *Emerg. Microbes Infect.* **2021**, *10*, 1626–1637. <https://doi.org/10.1080/22221751.2021.1964385>.
36. Keep, S.; Stevenson-Leggett, P.; Dowgier, G.; Everest, H.; Freimanis, G.; Oade, M.; Hammond, J.A.; Armesto, M.; Vila, R.; Bru, T.; et al. Identification of amino acids within non-structural proteins 10 and 14 of the avian coronavirus infectious bronchitis virus that result in attenuation *in vivo* and *in ovo*. *J. Virol.* **2022**, *96*, e0205921. <https://doi.org/10.1128/jvi.02059-21>.
37. Sperry, S.M.; Kazi, L.; Graham, R.L.; Baric, R.S.; Weiss, S.R.; Denison, M.R. Single-Amino-Acid Substitutions in Open Reading Frame (ORF) 1b-nsp14 and ORF 2a Proteins of the Coronavirus Mouse Hepatitis Virus Are Attenuating in Mice. *J. Virol.* **2005**, *79*, 3391–3400. <https://doi.org/10.1128/jvi.79.6.3391-3400.2005>.
38. Jing, Z.; Lu, S.; Ye, Z.; Delan, F.; Jinlong, C.; Guozhong, Z.; Kanta, S. Coronavirus Endoribonuclease Ensures Efficient Viral Replication and Prevents Protein Kinase R Activation. *Journal of Virology* **2021**, *95*, e02103–20.
39. Deng, X.; Hackbart, M.; Mettelman, R.C.; O'Brien, A.; Mielech, A.M.; Yi, G.; Kao, C.C.; Baker, S.C. Coronavirus nonstructural protein 15 mediates evasion of dsRNA sensors and limits apoptosis in macrophages. *Proc. Natl. Acad. Sci. U.S.A.* **2017**, *114*, E4251–E4260. <https://doi.org/10.1073/pnas.1618310114>.
40. Xufang, D.; Albert, van G.; C., B. A.; Amornrat, O.; Angela, P.; M., L. K.; S., F. K.; C., B. S.; Susana, L. Coronavirus Endoribonuclease Activity in Porcine Epidemic Diarrhea Virus Suppresses Type I and Type III Interferon Responses. *J. Virol* **2019**, *93*, e02000–18. <https://doi.org/10.1128/JVI.02000-18>.
41. Kindler, E.; Gil Cruz, C.; Spanier, J.; Li, Y.; Wilhelm, J.; Rabouw, H.H.; Züst, R.; Hwang, M.; V'Kovski, P.; Stalder, H.; et al. Early endonuclease-mediated evasion of RNA sensing ensures efficient coronavirus replication. *PLOS Pathog.* **2017**, *13*, e1006195. <https://doi.org/10.1371/journal.ppat.1006195>.
42. Züst, R.; Cervantes-Barragan, L.; Habjan, M.; Maier, R.; Neuman, B.W.; Ziebuhr, J.; Szretter, K.J.; Baker, S.C.; Barchet, W.; Diamond, M.S.; et al. Ribose 2'-O-methylation provides a molecular signature for the distinction of self and non-self mRNA dependent on the RNA sensor Mda5. *Nat. Immunol.* **2011**, *12*, 137–143. <https://doi.org/10.1038/ni.1979>.
43. Menachery, V.D.; Gralinski, L.E.; Mitchell, H.D.; Dinno, K.H., III; Leist, S.R.; Yount, B.L., Jr.; Graham, R.L.; McAnarney, E.T.; Stratton, K.G.; Cockrell, A.S.; et al. Middle East Respiratory Syndrome Coronavirus Nonstructural Protein 16 Is Necessary for Interferon Resistance and Viral Pathogenesis. *mSphere* **2017**, *2*, e00346–17. <https://doi.org/10.1128/msphere.00346-17>.
44. Yixuan, H.; Hanzhong, K.; Jineui, K.; Dongwan, Y.; Yunfang, S.; Patricia, B.; Juliet, C.; N., V. A.; J., S. L.; Qiuhong, W.; et al. Engineering a Live Attenuated Porcine Epidemic Diarrhea Virus Vaccine Candidate via Inactivation of the Viral 2'-O-Methyltransferase and the Endocytosis Signal of the Spike Protein. *Journal of Virology* **2019**, *93*, e00406–19.
45. Menachery, V. D.; Yount, B. L.; Josset, L.; Gralinski, L. E.; Scobey, T.; Agnihothram, S.; Katze, M. G.; Baric, R. S. Attenuation and Restoration of Severe Acute Respiratory Syndrome Coronavirus Mutant Lacking 2'-O-Methyltransferase Activity. *Journal of Virology* **2014**, *88*, 4251–4264. <https://doi.org/10.1128/JVI.03571-13>.
46. Menachery, V.D.; Gralinski, L.E.; Mitchell, H.D.; Dinno, K.H., III; Leist, S.R.; Yount, B.L., Jr.; McAnarney, E.T.; Graham, R.L.; Waters, K.M.; Baric, R.S. Combination Attenuation Offers Strategy for Live Attenuated Coronavirus Vaccines. *J. Virol.* **2018**, *92*. <https://doi.org/10.1128/jvi.00710-18>.
47. Voth, L. S.; O'Connor, J. J.; Kerr, C. M.; Doerger, E.; Schwarting, N.; Sperstad, P.; Johnson, D. K.; Fehr, A. R. Unique Mutations in the Murine Hepatitis Virus Macrodomain Differentially Attenuate Virus Replication, Indicating Multiple Roles for the Macrodomain in Coronavirus Replication. *Journal of Virology* **2021**, *95*, 766–787. <https://doi.org/10.1128/jvi.00766-21>.
48. Fehr, A.R.; Channappanavar, R.; Jankevicius, G.; Fett, C.; Zhao, J.; Athmer, J.; Meyerholz, D.K.; Ahel, I.; Perlman, S. The Conserved Coronavirus Macrodomain Promotes Virulence and Suppresses the Innate Immune Response during Severe Acute Respiratory Syndrome Coronavirus Infection. *mBio* **2016**, *7*, e01721–16. <https://doi.org/10.1128/mbio.01721-16>.
49. Grunewald, M.E.; Chen, Y.; Kuny, C.; Maejima, T.; Lease, R.; Ferraris, D.; Aikawa, M.; Sullivan, C.S.; Perlman, S.; Fehr, A.R. The coronavirus macrodomain is required to prevent PARP-mediated inhibition of virus replication and enhancement of IFN expression. *PLOS Pathog.* **2019**, *15*, e1007756. <https://doi.org/10.1371/journal.ppat.1007756>.
50. Fehr, A.R.; Athmer, J.; Channappanavar, R.; Phillips, J.M.; Meyerholz, D.K.; Perlman, S. The nsp3 Macrodomain Promotes Virulence in Mice with Coronavirus-Induced Encephalitis. *J. Virol.* **2014**, *89*, 1523–1536. <https://doi.org/10.1128/jvi.02596-14>.

51. Wheeler, D. L.; Sariol, A.; Meyerholz, D. K.; Perlman, S. Microglia are required for protection against lethal coronavirus encephalitis in mice. *Journal of Clinical Investigation* **2018**, *128*, 931-943, <https://doi.org/10.1172/JCI97229>.
52. Eriksson, K. K.; Cervantes-Barragán, L.; Ludewig, B.; Thiel, V. Mouse Hepatitis Virus Liver Pathology Is Dependent on ADP-Ribose-1"-Phosphatase, a Viral Function Conserved in the Alpha-Like Supergroup. *Journal of Virology* **2008**, *82*, 12325–12334.
53. Tsai, J.C.; de Groot, L.; Pinon, J.D.; Iacono, K.T.; Phillips, J.J.; Seo, S.-H.; Lavi, E.; Weiss, S.R. Amino acid substitutions within the heptad repeat domain 1 of murine coronavirus spike protein restrict viral antigen spread in the central nervous system. *Virology* **2003**, *312*, 369–380. [https://doi.org/10.1016/s0042-6822\(03\)00248-4](https://doi.org/10.1016/s0042-6822(03)00248-4).
54. Rockx, B.; Donaldson, E.; Frieman, M.; Sheahan, T.; Corti, D.; Lanzavecchia, A.; Baric, R.S. Escape from Human Monoclonal Antibody Neutralization Affects In Vitro and In Vivo Fitness of Severe Acute Respiratory Syndrome Coronavirus. *J. Infect. Dis.* **2010**, *201*, 946–955. <https://doi.org/10.1086/651022>.
55. De Groot, L.; Piñón, J.D.; Phillips, J.; Lavi, E.; Weiss, S.R. Pathogenesis of Fusion Deficient Recombinant Mouse Hepatitis Viruses. In *The Nidoviruses*, 1st ed.; Lavi E., Weiss S.R., Hingley S.T. Eds.; Springer: Boston, USA, **2001**, 159–162. [https://doi.org/10.1007/978-1-4615-1325-4\\_26](https://doi.org/10.1007/978-1-4615-1325-4_26).
56. Graham, R.L.; Deming, D.J.; Deming, M.E.; Yount, B.L.; Baric, R.S. Evaluation of a recombination-resistant coronavirus as a broadly applicable, rapidly implementable vaccine platform. *Commun. Biol.* **2018**, *1*, 179. <https://doi.org/10.1038/s42003-018-0175-7>.
