# Supplementary material for: The Reassessed Potential of SARS-CoV-2 Attenuation for COVID-19 Vaccine Development—A Systematic Review
Source: Viruses. 2022 May 7;14(5):991. doi: 10.3390/v14050991 (PMC9146402; doi:10.3390/v14050991)
Supplement: Supplementary file 1 [file viruses-14-00991-s001.zip]

Archive with 7 entries (7 files):
- Supplementary Figure S2.pdf
- Supplementary Figures S1a-S1af.pdf
- Supplementary Material S1.pdf
- Supplementary Table S1.xlsx
- Supplementary Table S3.pdf
- Supplementary Table S4.xlsx
- Supplementary Tables S2a-S2e.pdf
