# Supplementary material for: The Reassessed Potential of SARS-CoV-2 Attenuation for COVID-19 Vaccine Development—A Systematic Review
Source: Viruses. 2022 May 7;14(5):991. doi: 10.3390/v14050991 (PMC9146402; doi:10.3390/v14050991)
Supplement: Supplementary file 1 [file viruses-14-00991-s001.zip › Supplementary Table S1.xlsx]

## Sheet: Arkusz1
[s] AGO58929 Colorado PEDV ORF1	AGO58929 Colorado PEDV ORF1		9	27	AGO58929	Colorado PEDV ORF1
[s] S51114.1 E2=peplomer glycoprotein [murine hepatitis virus MHV-4, Genomic RNA, 4149 nt]	S51114.1 E2=peplomer glycoprotein [murine hepatitis virus MHV-4, Genomic RNA, 4149 nt]		9	86	S51114.1	E2=peplomer glycoprotein [murine hepatitis virus MHV-4, Genomic RNA, 4149 nt]
[s] AKA42985.1 S protein [Porcine deltacoronavirus]	AKA42985.1 S protein [Porcine deltacoronavirus]		11	47	AKA42985.1	S protein [Porcine deltacoronavirus]
[s] AWV67134.1 spike glycoprotein [Sparrow deltacoronavirus]	AWV67134.1 spike glycoprotein [Sparrow deltacoronavirus]		11	56	AWV67134.1	spike glycoprotein [Sparrow deltacoronavirus]
[s] AFO11521.1 membrane protein [Murine coronavirus]	AFO11521.1 membrane protein [Murine coronavirus]		11	48	AFO11521.1	membrane protein [Murine coronavirus]
[s] AFO11514.1 polyprotein ORF1ab [Murine coronavirus] (JHM.WU)	AFO11514.1 polyprotein ORF1ab [Murine coronavirus] (JHM.WU)		11	59	AFO11514.1	polyprotein ORF1ab [Murine coronavirus] (JHM.WU)
[s] ACN89763.1 spike protein [Murine coronavirus MHV-JHM.IA]	ACN89763.1 spike protein [Murine coronavirus MHV-JHM.IA]		11	56	ACN89763.1	spike protein [Murine coronavirus MHV-JHM.IA]
[s] AFE85963.1 hypothetical protein [Porcine epidemic diarrhea virus] DR13 strain virulent ORF3	AFE85963.1 hypothetical protein [Porcine epidemic diarrhea virus] DR13 strain virulent ORF3		11	91	AFE85963.1	hypothetical protein [Porcine epidemic diarrhea virus] DR13 strain virulent ORF3
[s] ARM65485.1 spike protein [Porcine epidemic diarrhea virus] strain PD22A	ARM65485.1 spike protein [Porcine epidemic diarrhea virus] strain PD22A		11	71	ARM65485.1	spike protein [Porcine epidemic diarrhea virus] strain PD22A
[s] ARM65490.1 spike protein [Porcine epidemic diarrhea virus] TC-PC177	ARM65490.1 spike protein [Porcine epidemic diarrhea virus] TC-PC177		11	67	ARM65490.1	spike protein [Porcine epidemic diarrhea virus] TC-PC177
[s] ARM65496.1 spike protein [Porcine epidemic diarrhea virus] strain PC22A	ARM65496.1 spike protein [Porcine epidemic diarrhea virus] strain PC22A		11	71	ARM65496.1	spike protein [Porcine epidemic diarrhea virus] strain PC22A
[s] AKR05178.1 spike protein [Porcine epidemic diarrhea virus] PC21A	AKR05178.1 spike protein [Porcine epidemic diarrhea virus] PC21A		11	64	AKR05178.1	spike protein [Porcine epidemic diarrhea virus] PC21A
[s] AAP33705.1 Orf8a [SARS coronavirus Frankfurt 1]	AAP33705.1 Orf8a [SARS coronavirus Frankfurt 1]		11	47	AAP33705.1	Orf8a [SARS coronavirus Frankfurt 1]
[s] AAP33706.1 Orf8b [SARS coronavirus Frankfurt 1]	AAP33706.1 Orf8b [SARS coronavirus Frankfurt 1]		11	47	AAP33706.1	Orf8b [SARS coronavirus Frankfurt 1]
[s] AFH55113.1 putative 3b protein [Feline coronavirus] Strain DF-2	AFH55113.1 putative 3b protein [Feline coronavirus] Strain DF-2		11	64	AFH55113.1	putative 3b protein [Feline coronavirus] Strain DF-2
[s] AFH55112.1 putative 3a protein [Feline coronavirus] Strain DF-2	AFH55112.1 putative 3a protein [Feline coronavirus] Strain DF-2		11	64	AFH55112.1	putative 3a protein [Feline coronavirus] Strain DF-2
[s] ACJ12835.1 3a protein [Infectious bronchitis virus] H52	ACJ12835.1 3a protein [Infectious bronchitis virus] H52		11	55	ACJ12835.1	3a protein [Infectious bronchitis virus] H52
[s] ACJ12839.1 5a [Infectious bronchitis virus]	ACJ12839.1 5a [Infectious bronchitis virus]		11	43	ACJ12839.1	5a [Infectious bronchitis virus]
[s] QCW07226.1 spike protein [Porcine epidemic diarrhea virus] CN/Liaoning25/2018	QCW07226.1 spike protein [Porcine epidemic diarrhea virus] CN/Liaoning25/2018		11	77	QCW07226.1	spike protein [Porcine epidemic diarrhea virus] CN/Liaoning25/2018
[s] ALS35469.1 spike protein [Porcine epidemic diarrhea virus] attenuated CV777	ALS35469.1 spike protein [Porcine epidemic diarrhea virus] attenuated CV777		11	75	ALS35469.1	spike protein [Porcine epidemic diarrhea virus] attenuated CV777
[s] AKP99781.1 spike protein [Porcine epidemic diarrhea virus] SQ2014	AKP99781.1 spike protein [Porcine epidemic diarrhea virus] SQ2014		11	65	AKP99781.1	spike protein [Porcine epidemic diarrhea virus] SQ2014
[s] ACZ72209.1 orf1ab polyprotein [SARS coronavirus MA15]	ACZ72209.1 orf1ab polyprotein [SARS coronavirus MA15]		11	53	ACZ72209.1	orf1ab polyprotein [SARS coronavirus MA15]
[s] ACO58524.1 spike glycoprotein S2 subunit, partial [Infectious bronchitis virus CK/CH/LHLJ/04V] P3	ACO58524.1 spike glycoprotein S2 subunit, partial [Infectious bronchitis virus CK/CH/LHLJ/04V] P3		11	97	ACO58524.1	spike glycoprotein S2 subunit, partial [Infectious bronchitis virus CK/CH/LHLJ/04V] P3
[s] ACO58544.1 spike glycoprotein S1 subunit, partial [Infectious bronchitis virus CK/CH/LHLJ/04V]	ACO58544.1 spike glycoprotein S1 subunit, partial [Infectious bronchitis virus CK/CH/LHLJ/04V]		11	94	ACO58544.1	spike glycoprotein S1 subunit, partial [Infectious bronchitis virus CK/CH/LHLJ/04V]
[s] ACO58544.1 spike glycoprotein S1 subunit, partial [Infectious bronchitis virus CK/CH/LHLJ/04V]	ACO58544.1 spike glycoprotein S1 subunit, partial [Infectious bronchitis virus CK/CH/LHLJ/04V]		11	94	ACO58544.1	spike glycoprotein S1 subunit, partial [Infectious bronchitis virus CK/CH/LHLJ/04V]
[s] ASK51717.1 spike glycoprotein [Porcine enteric alphacoronavirus GDS04]	ASK51717.1 spike glycoprotein [Porcine enteric alphacoronavirus GDS04]		11	70	ASK51717.1	spike glycoprotein [Porcine enteric alphacoronavirus GDS04]
[s] QCE31533.1 spike protein [Infectious bronchitis virus] M41-CK	QCE31533.1 spike protein [Infectious bronchitis virus] M41-CK		11	61	QCE31533.1	spike protein [Infectious bronchitis virus] M41-CK
[s] AAB19590.1 E2 [Murine hepatitis virus strain 4]	AAB19590.1 E2 [Murine hepatitis virus strain 4]		11	47	AAB19590.1	E2 [Murine hepatitis virus strain 4]
[s] AAP13441.1 S protein [SARS coronavirus Urbani]	AAP13441.1 S protein [SARS coronavirus Urbani]		11	46	AAP13441.1	S protein [SARS coronavirus Urbani]
[s] AAS00003.1 spike glycoprotein [SARS coronavirus GZ02]	AAS00003.1 spike glycoprotein [SARS coronavirus GZ02]		11	53	AAS00003.1	spike glycoprotein [SARS coronavirus GZ02]
[s] AY515512.1 SARS coronavirus HC/SZ/61/03, complete genome	AY515512.1 SARS coronavirus HC/SZ/61/03, complete genome		11	56	AY515512.1	SARS coronavirus HC/SZ/61/03, complete genome
[s] QDY92475.1 spike protein [Porcine epidemic diarrhea virus] Aram p5	QDY92475.1 spike protein [Porcine epidemic diarrhea virus] Aram p5		11	66	QDY92475.1	spike protein [Porcine epidemic diarrhea virus] Aram p5
[s] QDY92481.1 spike protein [Porcine epidemic diarrhea virus] Aram p29	QDY92481.1 spike protein [Porcine epidemic diarrhea virus] Aram p29		11	67	QDY92481.1	spike protein [Porcine epidemic diarrhea virus] Aram p29
[s] AFS88941.1 E protein [Human betacoronavirus 2c EMC/2012] MERS	AFS88941.1 E protein [Human betacoronavirus 2c EMC/2012] MERS		11	61	AFS88941.1	E protein [Human betacoronavirus 2c EMC/2012] MERS
[s] ABG89325.1 spike protein [TGEV Purdue P115]	ABG89325.1 spike protein [TGEV Purdue P115]		11	43	ABG89325.1	spike protein [TGEV Purdue P115]
[s] ART85697.1 spike protein [Porcine epidemic diarrhea virus] Pintung 52 P5	ART85697.1 spike protein [Porcine epidemic diarrhea virus] Pintung 52 P5		11	72	ART85697.1	spike protein [Porcine epidemic diarrhea virus] Pintung 52 P5
[s] ART85704.1 spike protein [Porcine epidemic diarrhea virus] Pintung 52 P96	ART85704.1 spike protein [Porcine epidemic diarrhea virus] Pintung 52 P96		11	73	ART85704.1	spike protein [Porcine epidemic diarrhea virus] Pintung 52 P96
[s] AHG97485.1 spike protein [Porcine epidemic diarrhea virus] CH/YNKM-8/2013	AHG97485.1 spike protein [Porcine epidemic diarrhea virus] CH/YNKM-8/2013		11	73	AHG97485.1	spike protein [Porcine epidemic diarrhea virus] CH/YNKM-8/2013
[s] AHG97559.1 spike protein [Porcine epidemic diarrhea virus] AH-M	AHG97559.1 spike protein [Porcine epidemic diarrhea virus] AH-M		11	63	AHG97559.1	spike protein [Porcine epidemic diarrhea virus] AH-M
[s] AAA47108.1 S protein [Transmissible gastroenteritis virus] PTV NEB72	AAA47108.1 S protein [Transmissible gastroenteritis virus] PTV NEB72		11	68	AAA47108.1	S protein [Transmissible gastroenteritis virus] PTV NEB72
[s] AAA47108.1 S protein [Transmissible gastroenteritis virus] PTV NEB72	AAA47108.1 S protein [Transmissible gastroenteritis virus] PTV NEB72		11	68	AAA47108.1	S protein [Transmissible gastroenteritis virus] PTV NEB72
[s] AAB19590.1 E2 [Murine hepatitis virus strain 4]	AAB19590.1 E2 [Murine hepatitis virus strain 4]		11	47	AAB19590.1	E2 [Murine hepatitis virus strain 4]
[s] AFQ31010.1 S protein [Infectious bronchitis virus] KM91	AFQ31010.1 S protein [Infectious bronchitis virus] KM91		11	56	AFQ31010.1	S protein [Infectious bronchitis virus] KM91
[s] ATJ01093.1 spike glycoprotein [Infectious bronchitis virus]	ATJ01093.1 spike glycoprotein [Infectious bronchitis virus]		11	59	ATJ01093.1	spike glycoprotein [Infectious bronchitis virus]
[s] AEJ80238.2 spike glycoprotein [Infectious bronchitis virus] non-attenyated YN	AEJ80238.2 spike glycoprotein [Infectious bronchitis virus] non-attenyated YN		11	77	AEJ80238.2	spike glycoprotein [Infectious bronchitis virus] non-attenyated YN
[s] QCQ81102.1 mutant S protein [Infectious bronchitis virus] attenuated YN	QCQ81102.1 mutant S protein [Infectious bronchitis virus] attenuated YN		11	71	QCQ81102.1	mutant S protein [Infectious bronchitis virus] attenuated YN
[s] QDA76308.1 ORF1ab [Infectious bronchitis virus] M41	QDA76308.1 ORF1ab [Infectious bronchitis virus] M41		11	51	QDA76308.1	ORF1ab [Infectious bronchitis virus] M41
[s] CAC39112.1 replicase polyprotein 1ab [Avian infectious bronchitis virus (strain Beaudette CK)]	CAC39112.1 replicase polyprotein 1ab [Avian infectious bronchitis virus (strain Beaudette CK)]		11	94	CAC39112.1	replicase polyprotein 1ab [Avian infectious bronchitis virus (strain Beaudette CK)]
[s] AY278741.1 SARS coronavirus Urbani, complete genome	AY278741.1 SARS coronavirus Urbani, complete genome		11	51	AY278741.1	SARS coronavirus Urbani, complete genome
[s] AY278554.2 SARS coronavirus CUHK-W1, complete genome	AY278554.2 SARS coronavirus CUHK-W1, complete genome		11	52	AY278554.2	SARS coronavirus CUHK-W1, complete genome
[s] AY291315.1 SARS coronavirus Frankfurt 1, complete genome	AY291315.1 SARS coronavirus Frankfurt 1, complete genome		11	56	AY291315.1	SARS coronavirus Frankfurt 1, complete genome
[s] AAP33695.1 polyprotein 1a [SARS coronavirus Frankfurt 1]	AAP33695.1 polyprotein 1a [SARS coronavirus Frankfurt 1]		11	56	AAP33695.1	polyprotein 1a [SARS coronavirus Frankfurt 1]
[s] AXY04000.1 nonstructural protein, partial [Bat coronavirus]	AXY04000.1 nonstructural protein, partial [Bat coronavirus]		11	59	AXY04000.1	nonstructural protein, partial [Bat coronavirus]
[s] AAF19386.1 spike glycoprotein precursor [Murine hepatitis virus strain 2]	AAF19386.1 spike glycoprotein precursor [Murine hepatitis virus strain 2]		11	73	AAF19386.1	spike glycoprotein precursor [Murine hepatitis virus strain 2]
[s] BAT33221.1 spike protein [Porcine epidemic diarrhea virus] TTR-2/JPN/2014	BAT33221.1 spike protein [Porcine epidemic diarrhea virus] TTR-2/JPN/2014		11	73	BAT33221.1	spike protein [Porcine epidemic diarrhea virus] TTR-2/JPN/2014
[s] BAT33269.1 spike protein [Porcine epidemic diarrhea virus] OKN-1/JPN/2013	BAT33269.1 spike protein [Porcine epidemic diarrhea virus] OKN-1/JPN/2013		11	73	BAT33269.1	spike protein [Porcine epidemic diarrhea virus] OKN-1/JPN/2013
[s] AAP13442.1 nonstructural polyprotein pp1ab [SARS coronavirus Urbani]	AAP13442.1 nonstructural polyprotein pp1ab [SARS coronavirus Urbani]		11	68	AAP13442.1	nonstructural polyprotein pp1ab [SARS coronavirus Urbani]
[s] AGO58929.1 polyprotein [Porcine epidemic diarrhea virus]	AGO58929.1 polyprotein [Porcine epidemic diarrhea virus]		11	56	AGO58929.1	polyprotein [Porcine epidemic diarrhea virus]
[s] QQL06463.1 polyprotein 1b [Avian coronavirus]	QQL06463.1 polyprotein 1b [Avian coronavirus]		11	45	QQL06463.1	polyprotein 1b [Avian coronavirus]
[s] ACZ72211.1 hypothetical protein sars3a [SARS coronavirus MA15]	ACZ72211.1 hypothetical protein sars3a [SARS coronavirus MA15]		11	62	ACZ72211.1	hypothetical protein sars3a [SARS coronavirus MA15]
[s] ACZ72213.1 envelope protein [SARS coronavirus MA15]	ACZ72213.1 envelope protein [SARS coronavirus MA15]		11	51	ACZ72213.1	envelope protein [SARS coronavirus MA15]
[s] QWV59979.1 surface glycoprotein [synthetic construct] COVI-VAC	QWV59979.1 surface glycoprotein [synthetic construct] COVI-VAC		11	62	QWV59979.1	surface glycoprotein [synthetic construct] COVI-VAC
[s] AAW33784.1 1a [Infectious bronchitis virus]	AAW33784.1 1a [Infectious bronchitis virus]		11	43	AAW33784.1	1a [Infectious bronchitis virus]
[s] AAW33785.1 1b [Infectious bronchitis virus]	AAW33785.1 1b [Infectious bronchitis virus]		11	43	AAW33785.1	1b [Infectious bronchitis virus]
[s] ALT66824.1 spike protein [Middle East respiratory syndrome-related coronavirus]	ALT66824.1 spike protein [Middle East respiratory syndrome-related coronavirus]		11	79	ALT66824.1	spike protein [Middle East respiratory syndrome-related coronavirus]
[s] AFS88936.1 S protein [Human betacoronavirus 2c EMC/2012]	AFS88936.1 S protein [Human betacoronavirus 2c EMC/2012]		11	56	AFS88936.1	S protein [Human betacoronavirus 2c EMC/2012]
[s] MZ404503.1 Synthetic construct COVI-VAC, complete sequence	MZ404503.1 Synthetic construct COVI-VAC, complete sequence		11	58	MZ404503.1	Synthetic construct COVI-VAC, complete sequence
[s] MN908947.3 Severe acute respiratory syndrome coronavirus 2 isolate Wuhan-Hu-1, complete genome	MN908947.3 Severe acute respiratory syndrome coronavirus 2 isolate Wuhan-Hu-1, complete genome		11	94	MN908947.3	Severe acute respiratory syndrome coronavirus 2 isolate Wuhan-Hu-1, complete genome
[s] OM212472.1 Severe acute respiratory syndrome coronavirus 2 isolate SARS-CoV-2/human/HKG/HKU-691/2021, complete genome	OM212472.1 Severe acute respiratory syndrome coronavirus 2 isolate SARS-CoV-2/human/HKG/HKU-691/2021, complete genome		11	117	OM212472.1	Severe acute respiratory syndrome coronavirus 2 isolate SARS-CoV-2/human/HKG/HKU-691/2021, complete genome
[s] OM212473.1 Severe acute respiratory syndrome coronavirus 2 isolate SARS-CoV-2/human/HKG/HKU-344/2021, complete genome	OM212473.1 Severe acute respiratory syndrome coronavirus 2 isolate SARS-CoV-2/human/HKG/HKU-344/2021, complete genome		11	117	OM212473.1	Severe acute respiratory syndrome coronavirus 2 isolate SARS-CoV-2/human/HKG/HKU-344/2021, complete genome
[s] NP_598311.1 hypothetical protein PEDVgp3 [Porcine epidemic diarrhea virus]	NP_598311.1 hypothetical protein PEDVgp3 [Porcine epidemic diarrhea virus]		12	74	NP_598311.1	hypothetical protein PEDVgp3 [Porcine epidemic diarrhea virus]
[s] NC_045512.2 Severe acute respiratory syndrome coronavirus 2 isolate Wuhan-Hu-1, complete genome	NC_045512.2 Severe acute respiratory syndrome coronavirus 2 isolate Wuhan-Hu-1, complete genome		12	95	NC_045512.2	Severe acute respiratory syndrome coronavirus 2 isolate Wuhan-Hu-1, complete genome
[s] YP_209233.1 spike glycoprotein [Murine hepatitis virus strain JHM]	YP_209233.1 spike glycoprotein [Murine hepatitis virus strain JHM]		12	66	YP_209233.1	spike glycoprotein [Murine hepatitis virus strain JHM]
[s] NP_040833.1 3b protein [Infectious bronchitis virus]	NP_040833.1 3b protein [Infectious bronchitis virus]		12	52	NP_040833.1	3b protein [Infectious bronchitis virus]
[s] NP_040832.1 3a protein [Infectious bronchitis virus]	NP_040832.1 3a protein [Infectious bronchitis virus]		12	52	NP_040832.1	3a protein [Infectious bronchitis virus]
[s] NP_839957.1 putative leader protein [Porcine epidemic diarrhea virus]	NP_839957.1 putative leader protein [Porcine epidemic diarrhea virus]		12	69	NP_839957.1	putative leader protein [Porcine epidemic diarrhea virus]
[s] NP_066134.1 ORF1ab polyprotein [Infectious bronchitis virus] Beaudette	NP_066134.1 ORF1ab polyprotein [Infectious bronchitis virus] Beaudette		12	70	NP_066134.1	ORF1ab polyprotein [Infectious bronchitis virus] Beaudette
[s] NP_828867.1 nsp9 [SARS coronavirus Tor2]	NP_828867.1 nsp9 [SARS coronavirus Tor2]		12	40	NP_828867.1	nsp9 [SARS coronavirus Tor2]
[s] NP_828870.1 nsp13 [SARS coronavirus Tor2]	NP_828870.1 nsp13 [SARS coronavirus Tor2]		12	41	NP_828870.1	nsp13 [SARS coronavirus Tor2]
[s] NP_828860.2 nsp1 [SARS coronavirus Tor2]	NP_828860.2 nsp1 [SARS coronavirus Tor2]		12	40	NP_828860.2	nsp1 [SARS coronavirus Tor2]
[s] NP_740623.1 coronavirus nsp2 (3CL-Pro) [Infectious bronchitis virus]	NP_740623.1 coronavirus nsp2 (3CL-Pro) [Infectious bronchitis virus]		12	68	NP_740623.1	coronavirus nsp2 (3CL-Pro) [Infectious bronchitis virus]
[s] NP_740623.1 coronavirus nsp2 (3CL-Pro) [Infectious bronchitis virus]	NP_740623.1 coronavirus nsp2 (3CL-Pro) [Infectious bronchitis virus]		12	68	NP_740623.1	coronavirus nsp2 (3CL-Pro) [Infectious bronchitis virus]
[s] NP_040834.1 small virion-associated protein [Infectious bronchitis virus] E Beaudette	NP_040834.1 small virion-associated protein [Infectious bronchitis virus] E Beaudette		12	85	NP_040834.1	small virion-associated protein [Infectious bronchitis virus] E Beaudette
[s] YP_209246.1 nsp3 or p210 [Murine hepatitis virus strain JHM]	YP_209246.1 nsp3 or p210 [Murine hepatitis virus strain JHM]		12	60	YP_209246.1	nsp3 or p210 [Murine hepatitis virus strain JHM]
[s] YP_209229.2 ORF1ab polyprotein [Murine hepatitis virus strain JHM]	YP_209229.2 ORF1ab polyprotein [Murine hepatitis virus strain JHM]		12	66	YP_209229.2	ORF1ab polyprotein [Murine hepatitis virus strain JHM]
[s] NC_045512.2 Severe acute respiratory syndrome coronavirus 2 isolate Wuhan-Hu-1, complete genome	NC_045512.2 Severe acute respiratory syndrome coronavirus 2 isolate Wuhan-Hu-1, complete genome		12	95	NC_045512.2	Severe acute respiratory syndrome coronavirus 2 isolate Wuhan-Hu-1, complete genome
[s] NC_004718.3 SARS coronavirus Tor2, complete genome	NC_004718.3 SARS coronavirus Tor2, complete genome		12	50	NC_004718.3	SARS coronavirus Tor2, complete genome
[s] NC_004718.3 SARS coronavirus Tor2, complete genome	NC_004718.3 SARS coronavirus Tor2, complete genome		12	50	NC_004718.3	SARS coronavirus Tor2, complete genome
[s] NP_828862.2 nsp3 [SARS coronavirus Tor2]	NP_828862.2 nsp3 [SARS coronavirus Tor2]		12	40	NP_828862.2	nsp3 [SARS coronavirus Tor2]
[s] NP_045300.1 spike protein [Murine hepatitis virus] MHV-A59 30385	NP_045300.1 spike protein [Murine hepatitis virus] MHV-A59 30385		12	64	NP_045300.1	spike protein [Murine hepatitis virus] MHV-A59 30385
[s] NP_040831.1 spike protein [Infectious bronchitis virus] Beaudette	NP_040831.1 spike protein [Infectious bronchitis virus] Beaudette		12	65	NP_040831.1	spike protein [Infectious bronchitis virus] Beaudette
[s] YP_209229.2 ORF1ab polyprotein [Murine hepatitis virus strain JHM]	YP_209229.2 ORF1ab polyprotein [Murine hepatitis virus strain JHM]		12	66	YP_209229.2	ORF1ab polyprotein [Murine hepatitis virus strain JHM]
[s] YP_209246.1 nsp3 or p210 [Murine hepatitis virus strain JHM]	YP_209246.1 nsp3 or p210 [Murine hepatitis virus strain JHM]		12	60	YP_209246.1	nsp3 or p210 [Murine hepatitis virus strain JHM]
[s] NC_045512.2 Severe acute respiratory syndrome coronavirus 2 isolate Wuhan-Hu-1, complete genome	NC_045512.2 Severe acute respiratory syndrome coronavirus 2 isolate Wuhan-Hu-1, complete genome		12	95	NC_045512.2	Severe acute respiratory syndrome coronavirus 2 isolate Wuhan-Hu-1, complete genome
[s] YP_005352846.1 spike glycoprotein [Sparrow coronavirus HKU17]	YP_005352846.1 spike glycoprotein [Sparrow coronavirus HKU17]		15	61	YP_005352846.1	spike glycoprotein [Sparrow coronavirus HKU17]
[s] YP_009724389.1 ORF1ab polyprotein [Severe acute respiratory syndrome coronavirus 2]	YP_009724389.1 ORF1ab polyprotein [Severe acute respiratory syndrome coronavirus 2]		15	83	YP_009724389.1	ORF1ab polyprotein [Severe acute respiratory syndrome coronavirus 2]
[s] YP_009824978.1 ORF1ab polyprotein [Murine hepatitis virus]	YP_009824978.1 ORF1ab polyprotein [Murine hepatitis virus]		15	58	YP_009824978.1	ORF1ab polyprotein [Murine hepatitis virus]
[s] YP_009824982.1 spike glycoprotein [Murine hepatitis virus] A59	YP_009824982.1 spike glycoprotein [Murine hepatitis virus] A59		15	62	YP_009824982.1	spike glycoprotein [Murine hepatitis virus] A59
[s] YP_009724393.1 membrane glycoprotein [Severe acute respiratory syndrome coronavirus 2]	YP_009724393.1 membrane glycoprotein [Severe acute respiratory syndrome coronavirus 2]		15	86	YP_009724393.1	membrane glycoprotein [Severe acute respiratory syndrome coronavirus 2]
[s] YP_009724389.1 ORF1ab polyprotein [Severe acute respiratory syndrome coronavirus 2]	YP_009724389.1 ORF1ab polyprotein [Severe acute respiratory syndrome coronavirus 2]		15	83	YP_009724389.1	ORF1ab polyprotein [Severe acute respiratory syndrome coronavirus 2]
[s] YP_009724391.1 ORF3a protein [Severe acute respiratory syndrome coronavirus 2]	YP_009724391.1 ORF3a protein [Severe acute respiratory syndrome coronavirus 2]		15	78	YP_009724391.1	ORF3a protein [Severe acute respiratory syndrome coronavirus 2]
[s] YP_009724396.1 ORF8 protein [Severe acute respiratory syndrome coronavirus 2]	YP_009724396.1 ORF8 protein [Severe acute respiratory syndrome coronavirus 2]		15	77	YP_009724396.1	ORF8 protein [Severe acute respiratory syndrome coronavirus 2]
[s] YP_004070195.1 putative 3a protein [Feline infectious peritonitis virus]	YP_004070195.1 putative 3a protein [Feline infectious peritonitis virus]		15	72	YP_004070195.1	putative 3a protein [Feline infectious peritonitis virus]
[s] YP_004070196.1 putative 3b protein [Feline infectious peritonitis virus]	YP_004070196.1 putative 3b protein [Feline infectious peritonitis virus]		15	72	YP_004070196.1	putative 3b protein [Feline infectious peritonitis virus]
[s] YP_009724394.1 ORF6 protein [Severe acute respiratory syndrome coronavirus 2]	YP_009724394.1 ORF6 protein [Severe acute respiratory syndrome coronavirus 2]		15	77	YP_009724394.1	ORF6 protein [Severe acute respiratory syndrome coronavirus 2]
[s] YP_009555241.1 spike surface glycoprotein [Human coronavirus OC43]	YP_009555241.1 spike surface glycoprotein [Human coronavirus OC43]		15	66	YP_009555241.1	spike surface glycoprotein [Human coronavirus OC43]
[s] YP_009725309.1 3'-to-5' exonuclease [Severe acute respiratory syndrome coronavirus 2]	YP_009725309.1 3'-to-5' exonuclease [Severe acute respiratory syndrome coronavirus 2]		15	85	YP_009725309.1	3'-to-5' exonuclease [Severe acute respiratory syndrome coronavirus 2]
[s] YP_009725299.1 nsp3 [Severe acute respiratory syndrome coronavirus 2] NSP3	YP_009725299.1 nsp3 [Severe acute respiratory syndrome coronavirus 2] NSP3		15	74	YP_009725299.1	nsp3 [Severe acute respiratory syndrome coronavirus 2] NSP3
[s] YP_009724392.1 envelope protein [Severe acute respiratory syndrome coronavirus 2]	YP_009724392.1 envelope protein [Severe acute respiratory syndrome coronavirus 2]		15	81	YP_009724392.1	envelope protein [Severe acute respiratory syndrome coronavirus 2]
[s] YP_009825054.1 small envelope protein [SARS coronavirus Tor2]	YP_009825054.1 small envelope protein [SARS coronavirus Tor2]		15	61	YP_009825054.1	small envelope protein [SARS coronavirus Tor2]
[s] YP_009915673.1 nsp1 [Murine hepatitis virus] A59	YP_009915673.1 nsp1 [Murine hepatitis virus] A59		15	48	YP_009915673.1	nsp1 [Murine hepatitis virus] A59
[s] YP_009725310.1 endoRNAse [Severe acute respiratory syndrome coronavirus 2] SARS-CoV-2 NSP15	YP_009725310.1 endoRNAse [Severe acute respiratory syndrome coronavirus 2] SARS-CoV-2 NSP15		15	91	YP_009725310.1	endoRNAse [Severe acute respiratory syndrome coronavirus 2] SARS-CoV-2 NSP15
[s] YP_009725301.1 3C-like proteinase [Severe acute respiratory syndrome coronavirus 2]	YP_009725301.1 3C-like proteinase [Severe acute respiratory syndrome coronavirus 2]		15	83	YP_009725301.1	3C-like proteinase [Severe acute respiratory syndrome coronavirus 2]
[s] YP_009742608.1 leader protein [Severe acute respiratory syndrome coronavirus 2]	YP_009742608.1 leader protein [Severe acute respiratory syndrome coronavirus 2]		15	79	YP_009742608.1	leader protein [Severe acute respiratory syndrome coronavirus 2]
[s] YP_009924354.1 nsp14 [Murine hepatitis virus] MHV A59	YP_009924354.1 nsp14 [Murine hepatitis virus] MHV A59		15	53	YP_009924354.1	nsp14 [Murine hepatitis virus] MHV A59
[s] YP_009725309.1 3'-to-5' exonuclease [Severe acute respiratory syndrome coronavirus 2]	YP_009725309.1 3'-to-5' exonuclease [Severe acute respiratory syndrome coronavirus 2]		15	85	YP_009725309.1	3'-to-5' exonuclease [Severe acute respiratory syndrome coronavirus 2]
[s] YP_009047204.1 spike protein [Middle East respiratory syndrome-related coronavirus]	YP_009047204.1 spike protein [Middle East respiratory syndrome-related coronavirus]		15	83	YP_009047204.1	spike protein [Middle East respiratory syndrome-related coronavirus]
[s] YP_009725305.1 nsp9 [Severe acute respiratory syndrome coronavirus 2]	YP_009725305.1 nsp9 [Severe acute respiratory syndrome coronavirus 2]		15	69	YP_009725305.1	nsp9 [Severe acute respiratory syndrome coronavirus 2]
[s] YP_009944370.1 nsp5 [SARS coronavirus Tor2]	YP_009944370.1 nsp5 [SARS coronavirus Tor2]		15	43	YP_009944370.1	nsp5 [SARS coronavirus Tor2]
[s] YP_009725301.1 3C-like proteinase [Severe acute respiratory syndrome coronavirus 2]	YP_009725301.1 3C-like proteinase [Severe acute respiratory syndrome coronavirus 2]		15	83	YP_009725301.1	3C-like proteinase [Severe acute respiratory syndrome coronavirus 2]
[s] YP_009725308.1 helicase [Severe acute respiratory syndrome coronavirus 2]	YP_009725308.1 helicase [Severe acute respiratory syndrome coronavirus 2]		15	73	YP_009725308.1	helicase [Severe acute respiratory syndrome coronavirus 2]
[s] YP_009825051.1 spike glycoprotein [SARS coronavirus Tor2]	YP_009825051.1 spike glycoprotein [SARS coronavirus Tor2]		15	57	YP_009825051.1	spike glycoprotein [SARS coronavirus Tor2]
[s] YP_009825055.1 membrane glycoprotein M [SARS coronavirus Tor2]	YP_009825055.1 membrane glycoprotein M [SARS coronavirus Tor2]		15	62	YP_009825055.1	membrane glycoprotein M [SARS coronavirus Tor2]
[s] YP_009724393.1 membrane glycoprotein [Severe acute respiratory syndrome coronavirus 2]	YP_009724393.1 membrane glycoprotein [Severe acute respiratory syndrome coronavirus 2]		15	86	YP_009724393.1	membrane glycoprotein [Severe acute respiratory syndrome coronavirus 2]
[s] YP_009724392.1 envelope protein [Severe acute respiratory syndrome coronavirus 2]	YP_009724392.1 envelope protein [Severe acute respiratory syndrome coronavirus 2]		15	81	YP_009724392.1	envelope protein [Severe acute respiratory syndrome coronavirus 2]
[s] YP_009825054.1 small envelope protein [SARS coronavirus Tor2]	YP_009825054.1 small envelope protein [SARS coronavirus Tor2]		15	61	YP_009825054.1	small envelope protein [SARS coronavirus Tor2]
[s] YP_009725297.1 leader protein [Severe acute respiratory syndrome coronavirus 2]	YP_009725297.1 leader protein [Severe acute respiratory syndrome coronavirus 2]		15	79	YP_009725297.1	leader protein [Severe acute respiratory syndrome coronavirus 2]
[s] YP_009724392.1 envelope protein [Severe acute respiratory syndrome coronavirus 2]	YP_009724392.1 envelope protein [Severe acute respiratory syndrome coronavirus 2]		15	81	YP_009724392.1	envelope protein [Severe acute respiratory syndrome coronavirus 2]
[s] YP_009825054.1 small envelope protein [SARS coronavirus Tor2]	YP_009825054.1 small envelope protein [SARS coronavirus Tor2]		15	61	YP_009825054.1	small envelope protein [SARS coronavirus Tor2]
[s] YP_009725299.1 nsp3 [Severe acute respiratory syndrome coronavirus 2]	YP_009725299.1 nsp3 [Severe acute respiratory syndrome coronavirus 2]		15	69	YP_009725299.1	nsp3 [Severe acute respiratory syndrome coronavirus 2]
[s] YP_009724392.1 envelope protein [Severe acute respiratory syndrome coronavirus 2]	YP_009724392.1 envelope protein [Severe acute respiratory syndrome coronavirus 2]		15	81	YP_009724392.1	envelope protein [Severe acute respiratory syndrome coronavirus 2]
[s] YP_009724389.1 ORF1ab polyprotein [Severe acute respiratory syndrome coronavirus 2]	YP_009724389.1 ORF1ab polyprotein [Severe acute respiratory syndrome coronavirus 2]		15	83	YP_009724389.1	ORF1ab polyprotein [Severe acute respiratory syndrome coronavirus 2]
[s] YP_009824987.1 nucleocapsid protein [Murine hepatitis virus] A59	YP_009824987.1 nucleocapsid protein [Murine hepatitis virus] A59		15	64	YP_009824987.1	nucleocapsid protein [Murine hepatitis virus] A59
[s] YP_009724397.2 nucleocapsid phosphoprotein [Severe acute respiratory syndrome coronavirus 2]	YP_009724397.2 nucleocapsid phosphoprotein [Severe acute respiratory syndrome coronavirus 2]		15	92	YP_009724397.2	nucleocapsid phosphoprotein [Severe acute respiratory syndrome coronavirus 2]
[s] YP_009824985.1 envelope protein [Murine hepatitis virus] MHV A59	YP_009824985.1 envelope protein [Murine hepatitis virus] MHV A59		15	64	YP_009824985.1	envelope protein [Murine hepatitis virus] MHV A59
[s] YP_009924345.1 nsp4 [Murine hepatitis virus] MHV A59	YP_009924345.1 nsp4 [Murine hepatitis virus] MHV A59		15	52	YP_009924345.1	nsp4 [Murine hepatitis virus] MHV A59
[s] YP_009725300.1 nsp4 [Severe acute respiratory syndrome coronavirus 2]	YP_009725300.1 nsp4 [Severe acute respiratory syndrome coronavirus 2]		15	69	YP_009725300.1	nsp4 [Severe acute respiratory syndrome coronavirus 2]
[s] YP_009824978.1 ORF1ab polyprotein [Murine hepatitis virus]	YP_009824978.1 ORF1ab polyprotein [Murine hepatitis virus]		15	58	YP_009824978.1	ORF1ab polyprotein [Murine hepatitis virus]
[s] YP_009924353.1 nsp13 [Murine hepatitis virus] A59	YP_009924353.1 nsp13 [Murine hepatitis virus] A59		15	49	YP_009924353.1	nsp13 [Murine hepatitis virus] A59
[s] YP_009725308.1 helicase [Severe acute respiratory syndrome coronavirus 2] NSP13	YP_009725308.1 helicase [Severe acute respiratory syndrome coronavirus 2] NSP13		15	79	YP_009725308.1	helicase [Severe acute respiratory syndrome coronavirus 2] NSP13
[s] YP_009725309.1 3'-to-5' exonuclease [Severe acute respiratory syndrome coronavirus 2] NSP14	YP_009725309.1 3'-to-5' exonuclease [Severe acute respiratory syndrome coronavirus 2] NSP14		15	91	YP_009725309.1	3'-to-5' exonuclease [Severe acute respiratory syndrome coronavirus 2] NSP14
[s] YP_009924354.1 nsp14 [Murine hepatitis virus] A59	YP_009924354.1 nsp14 [Murine hepatitis virus] A59		15	49	YP_009924354.1	nsp14 [Murine hepatitis virus] A59
[s] YP_009725311.1 2'-O-ribose methyltransferase [Severe acute respiratory syndrome coronavirus 2]	YP_009725311.1 2'-O-ribose methyltransferase [Severe acute respiratory syndrome coronavirus 2]		15	94	YP_009725311.1	2'-O-ribose methyltransferase [Severe acute respiratory syndrome coronavirus 2]
[s] YP_009725310.1 endoRNAse [Severe acute respiratory syndrome coronavirus 2]	YP_009725310.1 endoRNAse [Severe acute respiratory syndrome coronavirus 2]		15	74	YP_009725310.1	endoRNAse [Severe acute respiratory syndrome coronavirus 2]
[s] YP_009924352.1 nsp12 [Murine hepatitis virus]	YP_009924352.1 nsp12 [Murine hepatitis virus]		15	45	YP_009924352.1	nsp12 [Murine hepatitis virus]
[s] YP_009725307.1 RNA-dependent RNA polymerase [Severe acute respiratory syndrome coronavirus 2]	YP_009725307.1 RNA-dependent RNA polymerase [Severe acute respiratory syndrome coronavirus 2]		15	93	YP_009725307.1	RNA-dependent RNA polymerase [Severe acute respiratory syndrome coronavirus 2]
[s] YP_009047227.1 nsp16 protein [Middle East respiratory syndrome-related coronavirus]	YP_009047227.1 nsp16 protein [Middle East respiratory syndrome-related coronavirus]		15	83	YP_009047227.1	nsp16 protein [Middle East respiratory syndrome-related coronavirus]
[s] YP_009924342.1 nsp1 [Murine hepatitis virus] A59	YP_009924342.1 nsp1 [Murine hepatitis virus] A59		15	48	YP_009924342.1	nsp1 [Murine hepatitis virus] A59
[s] YP_009725297.1 leader protein [Severe acute respiratory syndrome coronavirus 2] WuhanHu-1 NSP1	YP_009725297.1 leader protein [Severe acute respiratory syndrome coronavirus 2] WuhanHu-1 NSP1		15	94	YP_009725297.1	leader protein [Severe acute respiratory syndrome coronavirus 2] WuhanHu-1 NSP1
[s] YP_009724389.1 ORF1ab polyprotein [Severe acute respiratory syndrome coronavirus 2]	YP_009724389.1 ORF1ab polyprotein [Severe acute respiratory syndrome coronavirus 2]		15	83	YP_009724389.1	ORF1ab polyprotein [Severe acute respiratory syndrome coronavirus 2]
[s] YP_009725307.1 RNA-dependent RNA polymerase [Severe acute respiratory syndrome coronavirus 2]	YP_009725307.1 RNA-dependent RNA polymerase [Severe acute respiratory syndrome coronavirus 2]		15	93	YP_009725307.1	RNA-dependent RNA polymerase [Severe acute respiratory syndrome coronavirus 2]
[s] YP_009924356.1 nsp16 [Murine hepatitis virus]	YP_009924356.1 nsp16 [Murine hepatitis virus]		15	45	YP_009924356.1	nsp16 [Murine hepatitis virus]
[s] YP_009725299.1 nsp3 [Severe acute respiratory syndrome coronavirus 2]	YP_009725299.1 nsp3 [Severe acute respiratory syndrome coronavirus 2]		15	69	YP_009725299.1	nsp3 [Severe acute respiratory syndrome coronavirus 2]
[s] YP_009924344.1 nsp3 [Murine hepatitis virus]	YP_009924344.1 nsp3 [Murine hepatitis virus]		15	44	YP_009924344.1	nsp3 [Murine hepatitis virus]
[s] YP_009824978.1 ORF1ab polyprotein [Murine hepatitis virus] A59	YP_009824978.1 ORF1ab polyprotein [Murine hepatitis virus] A59		15	62	YP_009824978.1	ORF1ab polyprotein [Murine hepatitis virus] A59
[s] YP_009825056.1 ORF6 protein [SARS coronavirus Tor2]	YP_009825056.1 ORF6 protein [SARS coronavirus Tor2]		15	51	YP_009825056.1	ORF6 protein [SARS coronavirus Tor2]
[s] YP_009724394.1 ORF6 protein [Severe acute respiratory syndrome coronavirus 2]	YP_009724394.1 ORF6 protein [Severe acute respiratory syndrome coronavirus 2]		15	77	YP_009724394.1	ORF6 protein [Severe acute respiratory syndrome coronavirus 2]
[s] YP_009725311.1 nsp16 2'-O-ribose methyltransferase [Severe acute respiratory syndrome coronavirus 2]	YP_009725311.1 nsp16 2'-O-ribose methyltransferase [Severe acute respiratory syndrome coronavirus 2]		15	100	YP_009725311.1	nsp16 2'-O-ribose methyltransferase [Severe acute respiratory syndrome coronavirus 2]
[s] YP_009725310.1 nsp15 endoRNAse [Severe acute respiratory syndrome coronavirus 2]	YP_009725310.1 nsp15 endoRNAse [Severe acute respiratory syndrome coronavirus 2]		15	80	YP_009725310.1	nsp15 endoRNAse [Severe acute respiratory syndrome coronavirus 2]
[s] YP_009725309.1 nsp14 3'-to-5' exonuclease [Severe acute respiratory syndrome coronavirus 2]	YP_009725309.1 nsp14 3'-to-5' exonuclease [Severe acute respiratory syndrome coronavirus 2]		15	91	YP_009725309.1	nsp14 3'-to-5' exonuclease [Severe acute respiratory syndrome coronavirus 2]
[s] YP_009725306.1 nsp10 [Severe acute respiratory syndrome coronavirus 2]	YP_009725306.1 nsp10 [Severe acute respiratory syndrome coronavirus 2]		15	70	YP_009725306.1	nsp10 [Severe acute respiratory syndrome coronavirus 2]
[s] YP_009725309.1 3'-to-5' exonuclease [Severe acute respiratory syndrome coronavirus 2]	YP_009725309.1 3'-to-5' exonuclease [Severe acute respiratory syndrome coronavirus 2]		15	85	YP_009725309.1	3'-to-5' exonuclease [Severe acute respiratory syndrome coronavirus 2]
[s] YP_009725307.1 RNA-dependent RNA polymerase [Severe acute respiratory syndrome coronavirus 2]	YP_009725307.1 RNA-dependent RNA polymerase [Severe acute respiratory syndrome coronavirus 2]		15	93	YP_009725307.1	RNA-dependent RNA polymerase [Severe acute respiratory syndrome coronavirus 2]
[s] YP_009725302.1 nsp6 [Severe acute respiratory syndrome coronavirus 2]	YP_009725302.1 nsp6 [Severe acute respiratory syndrome coronavirus 2]		15	69	YP_009725302.1	nsp6 [Severe acute respiratory syndrome coronavirus 2]
[s] YP_009725301.1 3C-like proteinase [Severe acute respiratory syndrome coronavirus 2]	YP_009725301.1 3C-like proteinase [Severe acute respiratory syndrome coronavirus 2]		15	83	YP_009725301.1	3C-like proteinase [Severe acute respiratory syndrome coronavirus 2]
[s] YP_009725300.1 nsp4 [Severe acute respiratory syndrome coronavirus 2]	YP_009725300.1 nsp4 [Severe acute respiratory syndrome coronavirus 2]		15	69	YP_009725300.1	nsp4 [Severe acute respiratory syndrome coronavirus 2]
[s] YP_009725299.1 nsp3 [Severe acute respiratory syndrome coronavirus 2]	YP_009725299.1 nsp3 [Severe acute respiratory syndrome coronavirus 2]		15	69	YP_009725299.1	nsp3 [Severe acute respiratory syndrome coronavirus 2]
[s] YP_009725298.1 nsp2 [Severe acute respiratory syndrome coronavirus 2]	YP_009725298.1 nsp2 [Severe acute respiratory syndrome coronavirus 2]		15	69	YP_009725298.1	nsp2 [Severe acute respiratory syndrome coronavirus 2]
[s] ACZ72208.1:1-180 orf1a polyprotein [SARS coronavirus MA15] NSP1	ACZ72208.1:1-180 orf1a polyprotein [SARS coronavirus MA15] NSP1		17	63	ACZ72208.1:1-180	orf1a polyprotein [SARS coronavirus MA15] NSP1
[s] AAX23975.1:248-832 ORF1ab polyprotein [synthetic construct] MHV A59 NSP2	AAX23975.1:248-832 ORF1ab polyprotein [synthetic construct] MHV A59 NSP2		19	72	AAX23975.1:248-832	ORF1ab polyprotein [synthetic construct] MHV A59 NSP2
[s] AAX23975.1:833-3141 ORF1ab polyprotein [synthetic construct] MHV A59 NSP3	AAX23975.1:833-3141 ORF1ab polyprotein [synthetic construct] MHV A59 NSP3		20	73	AAX23975.1:833-3141	ORF1ab polyprotein [synthetic construct] MHV A59 NSP3
[s] ACZ72208.1:819-2740 orf1a polyprotein [SARS coronavirus MA15]	ACZ72208.1:819-2740 orf1a polyprotein [SARS coronavirus MA15]		20	61	ACZ72208.1:819-2740	orf1a polyprotein [SARS coronavirus MA15]
[s] AAP50484.1:819-2740 ORF1a [SARS coronavirus FRA] NSP3	AAP50484.1:819-2740 ORF1a [SARS coronavirus FRA] NSP3		20	53	AAP50484.1:819-2740	ORF1a [SARS coronavirus FRA] NSP3
[s] AAX23975.1:4320-4456 ORF1ab polyprotein [synthetic construct] MHV A59 NSP10	AAX23975.1:4320-4456 ORF1ab polyprotein [synthetic construct] MHV A59 NSP10		21	76	AAX23975.1:4320-4456	ORF1ab polyprotein [synthetic construct] MHV A59 NSP10
[s] AAX23975.1:6506-6879 ORF1ab polyprotein [synthetic construct] MHV A59 NSP15	AAX23975.1:6506-6879 ORF1ab polyprotein [synthetic construct] MHV A59 NSP15		21	75	AAX23975.1:6506-6879	ORF1ab polyprotein [synthetic construct] MHV A59 NSP15
[s] AAX23975.1:3334-3636 ORF1ab polyprotein [synthetic construct] MHV A59 NSP5	AAX23975.1:3334-3636 ORF1ab polyprotein [synthetic construct] MHV A59 NSP5		21	74	AAX23975.1:3334-3636	ORF1ab polyprotein [synthetic construct] MHV A59 NSP5
[s] ACZ72208.1:3241-3546 orf1a polyprotein [SARS coronavirus MA15] NSP5	ACZ72208.1:3241-3546 orf1a polyprotein [SARS coronavirus MA15] NSP5		21	67	ACZ72208.1:3241-3546	orf1a polyprotein [SARS coronavirus MA15] NSP5
[s] AAX23975.1:3142-3333 ORF1ab polyprotein [synthetic construct]	AAX23975.1:3142-3333 ORF1ab polyprotein [synthetic construct]		21	61	AAX23975.1:3142-3333	ORF1ab polyprotein [synthetic construct]
[s] ACZ72209.1:4370-5301 orf1ab polyprotein [SARS coronavirus MA15] NSP12	ACZ72209.1:4370-5301 orf1ab polyprotein [SARS coronavirus MA15] NSP12		21	69	ACZ72209.1:4370-5301	orf1ab polyprotein [SARS coronavirus MA15] NSP12
[s] sp|P05139.2|VEMP_IBVM RecName: Full=Envelope small membrane protein; Short=E protein; Short=sM protein	P05139.2	VEMP_IBVM RecName: Full=Envelope small membrane protein; Short=E protein; Short=sM protein	#VALUE!	8	P05139.2	VEMP_IBVM RecName: Full=Envelope small membrane protein; Short=E protein; Short=sM protein
[s] YP_009724389.1:819-2763 ORF1ab polyprotein [Severe acute respiratory syndrome coronavirus 2] NSP3	YP_009724389.1:819-2763 ORF1ab polyprotein [Severe acute respiratory syndrome coronavirus 2] NSP3		24	97	YP_009724389.1:819-2763	ORF1ab polyprotein [Severe acute respiratory syndrome coronavirus 2] NSP3
[s] YP_009724389.1:4254-4392 ORF1ab polyprotein [Severe acute respiratory syndrome coronavirus 2] NSP10	YP_009724389.1:4254-4392 ORF1ab polyprotein [Severe acute respiratory syndrome coronavirus 2] NSP10		25	99	YP_009724389.1:4254-4392	ORF1ab polyprotein [Severe acute respiratory syndrome coronavirus 2] NSP10
[a] NC_045512 features	NC_045512	Wuhan-Hu-1	#VALUE!	9	NC_045512	Wuhan-Hu-1
[s] BCU00735	BCU00735	Bovine coronavirus strain Mebus, complete genome	#VALUE!	8	BCU00735	Bovine coronavirus strain Mebus, complete genome
[a] MZ064531 features	MZ064531	CPD2	#VALUE!	8	MZ064531	CPD2
[a] MZ064535 features	MZ064535	CPD6	#VALUE!	8	MZ064535	CPD6
[s] YP_009724389	YP_009724389	ORF1ab polyprotein [Severe acute respiratory syndrome coronavirus 2]	#VALUE!	12	YP_009724389	ORF1ab polyprotein [Severe acute respiratory syndrome coronavirus 2]
[s] AY291315	AY291315	SARS coronavirus Frankfurt 1	#VALUE!	8	AY291315	SARS coronavirus Frankfurt 1
[s] AY278741	AY278741	SARS coronavirus Urbani, complete genome	#VALUE!	8	AY278741	SARS coronavirus Urbani, complete genome
[a] MZ064546 features	MZ064546	sCPD10	#VALUE!	8	MZ064546	sCPD10
[a] MZ064541 features	MZ064541	sCPD3	#VALUE!	8	MZ064541	sCPD3
[a] MZ064542 features	MZ064542	sCPD4	#VALUE!	8	MZ064542	sCPD4
[a] MZ064545 features	MZ064545	sCPD9	#VALUE!	8	MZ064545	sCPD9
[s] NC_045512	NC_045512	Severe acute respiratory syndrome coronavirus 2 isolate Wuhan-Hu-1, complete genome	#VALUE!	9	NC_045512	Severe acute respiratory syndrome coronavirus 2 isolate Wuhan-Hu-1, complete genome
[s] NC_045512	NC_045512	Severe acute respiratory syndrome coronavirus 2 isolate Wuhan-Hu-1, complete genome	#VALUE!	9	NC_045512	Severe acute respiratory syndrome coronavirus 2 isolate Wuhan-Hu-1, complete genome
[s] gi|1796318598|ref|YP_009724390.1| surface glycoprotein [Severe acute respiratory syndrome coronavirus 2]	YP_009724390.1	surface glycoprotein [Severe acute respiratory syndrome coronavirus 2]	#VALUE!	14	YP_009724390.1	surface glycoprotein [Severe acute respiratory syndrome coronavirus 2]
[s] YP_009724389	YP_009724389	surface glycoprotein [Severe acute respiratory syndrome coronavirus 2]	#VALUE!	12	YP_009724389	surface glycoprotein [Severe acute respiratory syndrome coronavirus 2]
[s] YP_009724390	YP_009724390	surface glycoprotein [Severe acute respiratory syndrome coronavirus 2]	#VALUE!	12	YP_009724390	surface glycoprotein [Severe acute respiratory syndrome coronavirus 2]
[s] HQ462571	HQ462571	Transmissible gastroenteritis virus strain WH-1, complete genome	#VALUE!	8	HQ462571	Transmissible gastroenteritis virus strain WH-1, complete genome
[s] AGO58929_Colorado_PEDV_ORF1	AGO58929	Colorado_PEDV_ORF1	#VALUE!	8	AGO58929	Colorado_PEDV_ORF1

## Sheet: Arkusz2
Table S1. A complete list of GenBank entries that were used to assess the applicability of mutations in this article.
GenBank entry	Sequence name
AGO58929	Colorado PEDV ORF1
S51114.1	E2=peplomer glycoprotein [murine hepatitis virus MHV-4, Genomic RNA, 4149 nt]
AKA42985.1	S protein [Porcine deltacoronavirus]
AWV67134.1	spike glycoprotein [Sparrow deltacoronavirus]
AFO11521.1	membrane protein [Murine coronavirus]
AFO11514.1	polyprotein ORF1ab [Murine coronavirus] (JHM.WU)
ACN89763.1	spike protein [Murine coronavirus MHV-JHM.IA]
AFE85963.1	hypothetical protein [Porcine epidemic diarrhea virus] DR13 strain virulent ORF3
ARM65485.1	spike protein [Porcine epidemic diarrhea virus] strain PD22A
ARM65490.1	spike protein [Porcine epidemic diarrhea virus] TC-PC177
ARM65496.1	spike protein [Porcine epidemic diarrhea virus] strain PC22A
AKR05178.1	spike protein [Porcine epidemic diarrhea virus] PC21A
AAP33705.1	Orf8a [SARS coronavirus Frankfurt 1]
AAP33706.1	Orf8b [SARS coronavirus Frankfurt 1]
AFH55113.1	putative 3b protein [Feline coronavirus] Strain DF-2
AFH55112.1	putative 3a protein [Feline coronavirus] Strain DF-2
ACJ12835.1	3a protein [Infectious bronchitis virus] H52
ACJ12839.1	5a [Infectious bronchitis virus]
QCW07226.1	spike protein [Porcine epidemic diarrhea virus] CN/Liaoning25/2018
ALS35469.1	spike protein [Porcine epidemic diarrhea virus] attenuated CV777
AKP99781.1	spike protein [Porcine epidemic diarrhea virus] SQ2014
ACZ72209.1	orf1ab polyprotein [SARS coronavirus MA15]
ACO58524.1	spike glycoprotein S2 subunit, partial [Infectious bronchitis virus CK/CH/LHLJ/04V] P3
ACO58544.1	spike glycoprotein S1 subunit, partial [Infectious bronchitis virus CK/CH/LHLJ/04V]
ASK51717.1	spike glycoprotein [Porcine enteric alphacoronavirus GDS04]
QCE31533.1	spike protein [Infectious bronchitis virus] M41-CK
AAB19590.1	E2 [Murine hepatitis virus strain 4]
AAP13441.1	S protein [SARS coronavirus Urbani]
AAS00003.1	spike glycoprotein [SARS coronavirus GZ02]
AY515512.1	SARS coronavirus HC/SZ/61/03, complete genome
QDY92475.1	spike protein [Porcine epidemic diarrhea virus] Aram p5
QDY92481.1	spike protein [Porcine epidemic diarrhea virus] Aram p29
AFS88941.1	E protein [Human betacoronavirus 2c EMC/2012] MERS
ABG89325.1	spike protein [TGEV Purdue P115]
ART85697.1	spike protein [Porcine epidemic diarrhea virus] Pintung 52 P5
ART85704.1	spike protein [Porcine epidemic diarrhea virus] Pintung 52 P96
AHG97485.1	spike protein [Porcine epidemic diarrhea virus] CH/YNKM-8/2013
AHG97559.1	spike protein [Porcine epidemic diarrhea virus] AH-M
AAA47108.1	S protein [Transmissible gastroenteritis virus] PTV NEB72
AFQ31010.1	S protein [Infectious bronchitis virus] KM91
ATJ01093.1	spike glycoprotein [Infectious bronchitis virus]
AEJ80238.2	spike glycoprotein [Infectious bronchitis virus] non-attenyated YN
QCQ81102.1	mutant S protein [Infectious bronchitis virus] attenuated YN
QDA76308.1	ORF1ab [Infectious bronchitis virus] M41
CAC39112.1	replicase polyprotein 1ab [Avian infectious bronchitis virus (strain Beaudette CK)]
AY278741.1	SARS coronavirus Urbani, complete genome
AY278554.2	SARS coronavirus CUHK-W1, complete genome
AY291315.1	SARS coronavirus Frankfurt 1, complete genome
AAP33695.1	polyprotein 1a [SARS coronavirus Frankfurt 1]
AXY04000.1	nonstructural protein, partial [Bat coronavirus]
AAF19386.1	spike glycoprotein precursor [Murine hepatitis virus strain 2]
BAT33221.1	spike protein [Porcine epidemic diarrhea virus] TTR-2/JPN/2014
BAT33269.1	spike protein [Porcine epidemic diarrhea virus] OKN-1/JPN/2013
AAP13442.1	nonstructural polyprotein pp1ab [SARS coronavirus Urbani]
AGO58929.1	polyprotein [Porcine epidemic diarrhea virus]
QQL06463.1	polyprotein 1b [Avian coronavirus]
ACZ72211.1	hypothetical protein sars3a [SARS coronavirus MA15]
ACZ72213.1	envelope protein [SARS coronavirus MA15]
QWV59979.1	surface glycoprotein [synthetic construct] COVI-VAC
AAW33784.1	1a [Infectious bronchitis virus]
AAW33785.1	1b [Infectious bronchitis virus]
ALT66824.1	spike protein [Middle East respiratory syndrome-related coronavirus]
AFS88936.1	S protein [Human betacoronavirus 2c EMC/2012]
MZ404503.1	Synthetic construct COVI-VAC, complete sequence
MN908947.3	Severe acute respiratory syndrome coronavirus 2 isolate Wuhan-Hu-1, complete genome
OM212472.1	Severe acute respiratory syndrome coronavirus 2 isolate SARS-CoV-2/human/HKG/HKU-691/2021, complete genome
OM212473.1	Severe acute respiratory syndrome coronavirus 2 isolate SARS-CoV-2/human/HKG/HKU-344/2021, complete genome
NP_598311.1	hypothetical protein PEDVgp3 [Porcine epidemic diarrhea virus]
NC_045512.2	Severe acute respiratory syndrome coronavirus 2 isolate Wuhan-Hu-1, complete genome
YP_209233.1	spike glycoprotein [Murine hepatitis virus strain JHM]
NP_040833.1	3b protein [Infectious bronchitis virus]
NP_040832.1	3a protein [Infectious bronchitis virus]
NP_839957.1	putative leader protein [Porcine epidemic diarrhea virus]
NP_066134.1	ORF1ab polyprotein [Infectious bronchitis virus] Beaudette
NP_828867.1	nsp9 [SARS coronavirus Tor2]
NP_828870.1	nsp13 [SARS coronavirus Tor2]
NP_828860.2	nsp1 [SARS coronavirus Tor2]
NP_740623.1	coronavirus nsp2 (3CL-Pro) [Infectious bronchitis virus]
NP_040834.1	small virion-associated protein [Infectious bronchitis virus] E Beaudette
YP_209246.1	nsp3 or p210 [Murine hepatitis virus strain JHM]
YP_209229.2	ORF1ab polyprotein [Murine hepatitis virus strain JHM]
NC_004718.3	SARS coronavirus Tor2, complete genome
NP_828862.2	nsp3 [SARS coronavirus Tor2]
NP_045300.1	spike protein [Murine hepatitis virus] MHV-A59 30385
NP_040831.1	spike protein [Infectious bronchitis virus] Beaudette
YP_005352846.1	spike glycoprotein [Sparrow coronavirus HKU17]
YP_009724389.1	ORF1ab polyprotein [Severe acute respiratory syndrome coronavirus 2]
YP_009824978.1	ORF1ab polyprotein [Murine hepatitis virus]
YP_009824982.1	spike glycoprotein [Murine hepatitis virus] A59
YP_009724393.1	membrane glycoprotein [Severe acute respiratory syndrome coronavirus 2]
YP_009724391.1	ORF3a protein [Severe acute respiratory syndrome coronavirus 2]
YP_009724396.1	ORF8 protein [Severe acute respiratory syndrome coronavirus 2]
YP_004070195.1	putative 3a protein [Feline infectious peritonitis virus]
YP_004070196.1	putative 3b protein [Feline infectious peritonitis virus]
YP_009724394.1	ORF6 protein [Severe acute respiratory syndrome coronavirus 2]
YP_009555241.1	spike surface glycoprotein [Human coronavirus OC43]
YP_009725309.1	3'-to-5' exonuclease [Severe acute respiratory syndrome coronavirus 2]
YP_009725299.1	nsp3 [Severe acute respiratory syndrome coronavirus 2] NSP3
YP_009724392.1	envelope protein [Severe acute respiratory syndrome coronavirus 2]
YP_009825054.1	small envelope protein [SARS coronavirus Tor2]
YP_009915673.1	nsp1 [Murine hepatitis virus] A59
YP_009725310.1	endoRNAse [Severe acute respiratory syndrome coronavirus 2] SARS-CoV-2 NSP15
YP_009725301.1	3C-like proteinase [Severe acute respiratory syndrome coronavirus 2]
YP_009742608.1	leader protein [Severe acute respiratory syndrome coronavirus 2]
YP_009924354.1	nsp14 [Murine hepatitis virus] MHV A59
YP_009047204.1	spike protein [Middle East respiratory syndrome-related coronavirus]
YP_009725305.1	nsp9 [Severe acute respiratory syndrome coronavirus 2]
YP_009944370.1	nsp5 [SARS coronavirus Tor2]
YP_009725308.1	helicase [Severe acute respiratory syndrome coronavirus 2]
YP_009825051.1	spike glycoprotein [SARS coronavirus Tor2]
YP_009825055.1	membrane glycoprotein M [SARS coronavirus Tor2]
YP_009725297.1	leader protein [Severe acute respiratory syndrome coronavirus 2]
YP_009824987.1	nucleocapsid protein [Murine hepatitis virus] A59
YP_009724397.2	nucleocapsid phosphoprotein [Severe acute respiratory syndrome coronavirus 2]
YP_009824985.1	envelope protein [Murine hepatitis virus] MHV A59
YP_009924345.1	nsp4 [Murine hepatitis virus] MHV A59
YP_009725300.1	nsp4 [Severe acute respiratory syndrome coronavirus 2]
YP_009924353.1	nsp13 [Murine hepatitis virus] A59
YP_009725311.1	2'-O-ribose methyltransferase [Severe acute respiratory syndrome coronavirus 2]
YP_009924352.1	nsp12 [Murine hepatitis virus]
YP_009725307.1	RNA-dependent RNA polymerase [Severe acute respiratory syndrome coronavirus 2]
YP_009047227.1	nsp16 protein [Middle East respiratory syndrome-related coronavirus]
YP_009924342.1	nsp1 [Murine hepatitis virus] A59
YP_009924356.1	nsp16 [Murine hepatitis virus]
YP_009924344.1	nsp3 [Murine hepatitis virus]
YP_009825056.1	ORF6 protein [SARS coronavirus Tor2]
YP_009725306.1	nsp10 [Severe acute respiratory syndrome coronavirus 2]
YP_009725302.1	nsp6 [Severe acute respiratory syndrome coronavirus 2]
YP_009725298.1	nsp2 [Severe acute respiratory syndrome coronavirus 2]
ACZ72208.1:1-180	orf1a polyprotein [SARS coronavirus MA15] NSP1
AAX23975.1:248-832	ORF1ab polyprotein [synthetic construct] MHV A59 NSP2
AAX23975.1:833-3141	ORF1ab polyprotein [synthetic construct] MHV A59 NSP3
ACZ72208.1:819-2740	orf1a polyprotein [SARS coronavirus MA15]
AAP50484.1:819-2740	ORF1a [SARS coronavirus FRA] NSP3
AAX23975.1:4320-4456	ORF1ab polyprotein [synthetic construct] MHV A59 NSP10
AAX23975.1:6506-6879	ORF1ab polyprotein [synthetic construct] MHV A59 NSP15
AAX23975.1:3334-3636	ORF1ab polyprotein [synthetic construct] MHV A59 NSP5
ACZ72208.1:3241-3546	orf1a polyprotein [SARS coronavirus MA15] NSP5
AAX23975.1:3142-3333	ORF1ab polyprotein [synthetic construct]
ACZ72209.1:4370-5301	orf1ab polyprotein [SARS coronavirus MA15] NSP12
P05139.2	VEMP_IBVM RecName: Full=Envelope small membrane protein; Short=E protein; Short=sM protein
YP_009724389.1:819-2763	ORF1ab polyprotein [Severe acute respiratory syndrome coronavirus 2] NSP3
YP_009724389.1:4254-4392	ORF1ab polyprotein [Severe acute respiratory syndrome coronavirus 2] NSP10
NC_045512	Severe acute respiratory syndrome coronavirus 2 isolate Wuhan-Hu-1, complete genome
BCU00735	Bovine coronavirus strain Mebus, complete genome
MZ064531	Synthetic construct clone CPD2 ORF1ab polyprotein (ORF1ab) gene, partial cds
MZ064535	Synthetic construct clone CPD6 ORF1ab polyprotein, nsp12 region, (ORF1ab) and ORF1a polyprotein (ORF1ab) genes, partial cds
YP_009724389	ORF1ab polyprotein [Severe acute respiratory syndrome coronavirus 2]
AY291315	SARS coronavirus Frankfurt 1
AY278741	SARS coronavirus Urbani, complete genome
MZ064546	Synthetic construct clone sCPD10 ORF1ab polyprotein (S) and ORF3a protein (ORF3a) genes, partial cds
MZ064541	Synthetic construct clone sCPD3 ORF1ab polyprotein (ORF1ab) gene, partial cds
MZ064542	Synthetic construct clone sCPD4 ORF1ab polyprotein (ORF1ab) gene, partial cds
MZ064545	Synthetic construct clone sCPD9 ORF1ab polyprotein (ORF1ab) and surface glycoprotein (S) genes, partial cds
YP_009724390.1	surface glycoprotein [Severe acute respiratory syndrome coronavirus 2]
YP_009724390	surface glycoprotein [Severe acute respiratory syndrome coronavirus 2]
HQ462571	Transmissible gastroenteritis virus strain WH-1, complete genome
AAG48591.1	replicase_polyprotein_1ab_[Human_coronavirus_229E]
FJ882957.1	SARS coronavirus MA15, complete genome
ARM65495.1	ORF1a/b [Porcine epidemic diarrhea virus]
AFS88944.1	ORF1ab [Human betacoronavirus 2c EMC/2012]
