# Supplementary material for: The Reassessed Potential of SARS-CoV-2 Attenuation for COVID-19 Vaccine Development—A Systematic Review
Source: Viruses. 2022 May 7;14(5):991. doi: 10.3390/v14050991 (PMC9146402; doi:10.3390/v14050991)
Supplement: Supplementary file 1 [file viruses-14-00991-s001.zip › Supplementary Table S4.xlsx]

## Sheet: Table S4
Table S4. A complete list of database search results with reasons for exclusion.
PubMed ID	DOI	Title	Authors	Source title	Year	Title+Abstract screening decision	Full text screening decision
34010337	10.1371/journal.pone.0251872	"Don, doff, discard" to "don, doff, decontaminate"-FFR and mask integrity and inactivation of a SARS-CoV-2 surrogate and a norovirus following multiple vaporised hydrogen peroxide-, ultraviolet germicidal irradiation-, and dry heat decontaminations	Ludwig-Begall LF, Wielick C, Jolois O, Dams L, Razafimahefa RM, Nauwynck H, Demeuldre PF, Napp A, Laperre J, Thiry E, Haubruge E.	PLoS One	2021	Record concerns coronaviruses but describes neither a novel nor an attenuated coronavirus
	10.1038/s41420-018-0032-y	#2714, a novel active inhibitor with potent G2/M phase arrest and antitumor efficacy in preclinical models	Lu W.-J., Peng W., Sun Q.-Q., Li Y.-H., Chen B., Yu L.-T., Xu Y.-Z., Wang S.-Y., Zhao Y.-L.	Cell Death Discovery	2018	Record does not concern coronaviruses
12882681		[A clinicopathological study on 3 cases of severe acute respiratory syndrome]	Lang ZW, Zhang LJ, Zhang SJ, Meng X, Li JQ, Song CZ, Sun L, Zhou YS.	Zhonghua Bing Li Xue Za Zhi	2003	Record concerns coronaviruses but describes neither a novel nor an attenuated coronavirus
15774184		[A follow-up study of the lung function and the chest CT changes in medical staff with severe acute respiratory syndrome in Beijing]	Beijing Respiratory Experts Panel of the Medical Staff Severe Acute Respiratory Syndrome Patients.	Zhonghua Jie He He Hu Xi Za Zhi	2005	Record concerns coronaviruses but describes neither a novel nor an attenuated coronavirus
34633939		[A functional platform to monitor SARS-CoV-2-specific T cell responses in vaccinated individuals and COVID-19 recovered patients]	Manselle Cocco MN, Veigas F, Bach CA, Blidner AG, Cagnoni AJ, D'Alotto-Moreno T, Hockl PF, Mahmoud Y, Scheidegger MA, Sirino AB, Torres NI, Wiersba V, Rabinovich GA.	Medicina (B Aires)	2021	Record concerns coronaviruses but describes neither a novel nor an attenuated coronavirus
34954967	10.3760/cma.j.cn112338-20210807-00617	[A randomized controlled trial study of immunogenicity and safety of an inactivated SARS-CoV-2 vaccine in different immunization schedules]	Chen J, Li XQ, Lu XX, Xing RQ, Li H, Zhang XH, Wei ZY, Mu SC, Feng LZ, Wang SP.	Zhonghua Liu Xing Bing Xue Za Zhi	2021	Record concerns coronaviruses but describes neither a novel nor an attenuated coronavirus
6284011		[Adaptation of an isolate of bovine enteritic coronavirus to serial growth in cell culture and characterization of the virus (author's transl)]	L'Haridon R, Scherrer R, Vautherot JF, La Bonnardière C, Laporte J, Cohen J.	Ann Rech Vet	1981	Report not retrieved
3002010		[Associated vaccination of poultry against infectious bronchitis, Newcastle disease and infectious bursitis]	Cholakova R.	Vet Med Nauki	1985	Report not retrieved
696074		[Attempts to develop an immunoprevention against transmissible gastroenteritis (TGE) in pigs. III. Passive immunotransfer following oral vaccination of pregnant sows with the attenuated TGE virus strain B1]	Hess RG, Bachmann PA, Mayr A.	Zentralbl Veterinarmed B	1978	Report not retrieved
3027956		[Attenuated vaccine against rota- and coronavirus enteritis in calves]	Kharalambiev KhE, Mitov B, Georgiev GK, Sizov I, Simeonov S.	Vet Med Nauki	1986	Report not retrieved
20707223		[Avian infectious bronchitis disease in Tunisia: seroprevalence, pathogenicity and compatibility studies of vaccine-field isolates]	Bourogaa H, Miled K, Larbi I, Nsiri J, Gribaa L, El Behi I, Ben Rhouma W, Allagui E, Sassi H, Ghram A.	Arch Inst Pasteur Tunis	2009	Record not in English
16515044		[Biological properties of the chick infectious bronchitis virus isolated in Russia]	Batchenko GV, Bochkov IuA, Lugovskaia NN, Frolov SV, Drygin VV, Borisov AV.	Vopr Virusol	2006	Record not in English
21774251		[Characterization and development of recombinant vaccinia viruses expressing different segments of spike protein derived from human coronavirus NL-63].	Zhao G.X., Zhou W.M., Lu R.J., Wang H.J., Zhao M., Zhang T.Y., Deng Y., Gao J.M., Tan W.J.	Bing du xue bao = Chinese journal of virology / [bian ji, Bing du xue bao bian ji wei yuan hui]	2011	Record concerns coronaviruses but describes neither a novel nor an attenuated coronavirus
16261215		[Cloning, purification, and antigenic characterization of three recombinant fragments derived from SARS-CoV S1 domain]	Mei YB, Liao ZY, Wang YD, Zhang LY, Xu H, Yuen KY, Che XY.	Zhonghua Shi Yan He Lin Chuang Bing Du Xue Za Zhi	2005	Record concerns coronaviruses but describes neither a novel nor an attenuated coronavirus
11852783		[Combined vaccine protecting from transmissible swine gastroenteritis]	Aliper TI, Sergeev VA, Nepoklonov EA.	Vopr Virusol	2002	Report not retrieved
6312956		[Comparative serological studies of south Germany field isolates of chicken in infectious bronchitis virus and vaccine strains in tracheal cultures]	Locher M, Lohr JE, Kösters J.	Berl Munch Tierarztl Wochenschr	1983	Report not retrieved
5815857		[Comparative studies on the pathogenicity, histo-pathogenesis and immunizing ability of two attenuated strains of avian infectious bronchitis virus]	Fritzsche K, Stumpel M, Toucas L, Billon I.	Zentralbl Veterinarmed B	1969	The sequence of coronavirus described by the record is not known
5511060		[Comparative study of the immunizing propery of attenuated liver vaccines against infectious bronchitis of poultry]	Metianu T, Lucas A, Brion A.	Rev Immunol (Paris)	1970	The sequence of coronavirus described by the record is not known
16027779		[Conditions for SARS-CoV cultivation and inactivation]	Zhang SL, Ma LJ, Tian G, Zhang LY, Zhang XY, Wang XL.	Zhonghua Shi Yan He Lin Chuang Bing Du Xue Za Zhi	2005	Record concerns coronaviruses but describes neither a novel nor an attenuated coronavirus
17302155		[Construction of genomic full-length cDNA of SARS coronavirus BJ01 strain and identification of its biological characteristics]	Han JF, Jiang T, Chen SP, Yu M, Qin ED, Zhao Z, Li XF, Qin CF, Deng YQ, Zhao H, Zha HL, Li XY.	Wei Sheng Wu Xue Bao	2006	Record describes a novel non-attenuated coronavirus
17552243		[Construction of recombinant BCG bearing S1 glycoprotein of nephropathogenic IBV and study on its immunogenicity on chickens]	Bai JN, Bian YQ, Zhao BH.	Wei Sheng Wu Xue Bao	2007	Record concerns coronaviruses but describes neither a novel nor an attenuated coronavirus
17552246		[Construction of recombinant Lactococcus lactis expressing porcine transmissible gastroenteritis spike glycoprotein and analysis of immunogenicity]	Tang LJ, Ou D, Ge JW, Xu YG, Li YJ, Shi D, Xia CL, Yu Y.	Wei Sheng Wu Xue Bao	2007	Record concerns coronaviruses but describes neither a novel nor an attenuated coronavirus
19388267		[Construction, safety and immunogenicity analysis of attenuated salmonella typhimurium harbouring TGEV DNA vaccine]	Yang H, Liu J, Cao S, Huang X, Wen X.	Wei Sheng Wu Xue Bao	2009	Record concerns coronaviruses but describes neither a novel nor an attenuated coronavirus
3002005		[Creation of an avirulent immunogenic mutant of the transmissible gastroenteritis virus and its use as a vaccine]	Tatarov G.	Vet Med Nauki	1985	Report not retrieved
6093344		[Cultivation of the transmissible gastroenteritis virus in a continuous cell line]	Belopopska P, Motovski A.	Vet Med Nauki	1984	Report not retrieved
15631748		[Detection of SARS-CoV and RNA on aerosol samples from SARS-patients admitted to hospital]	Xiao WJ, Wang ML, Wei W, Wang J, Zhao JJ, Yi B, Li JS.	Zhonghua Liu Xing Bing Xue Za Zhi	2004	Record concerns coronaviruses but describes neither a novel nor an attenuated coronavirus
18092680		[Development and application of a safe SARS-CoV neutralization assay based on lentiviral vectors pseudotyped with SARS-CoV spike protein]	Yan KX, Tan WJ, Zhang XM, Wang HJ, Li Y, Ruan L.	Bing Du Xue Bao	2007	Record concerns coronaviruses but describes neither a novel nor an attenuated coronavirus
6278692		[Diagnosis of bovine coronaviruses using mouse erythrocyte suspensions stabilized with formalin]	Stĕpánek J, Mensík P, Mensík J, Franz J, Smíd B, Valícek L.	Vet Med (Praha)	1982	Record concerns coronaviruses but describes neither a novel nor an attenuated coronavirus
25272586		[Dynamic distribution of the avian infectious bronchitis virus isolate strain Jin-13 in SPF chickens].	Li H., Yang X., Zhao J., Wang Z.T., Chen L., Wang X.W., Chang H.T., Li Y.T., Liu H.Y., Wang C.Q.	Bing du xue bao = Chinese journal of virology / [bian ji, Bing du xue bao bian ji wei yuan hui]	2014	Record concerns coronaviruses but describes neither a novel nor an attenuated coronavirus
23367560		[Evaluation of antigenic relationship of Guangxi isolates of infectious bronchitis virus].	Wang X.Y., Li M., Wei P., Chen Q.Y., Wei Z.J., Mo M.L., Wei T.C.	Bing du xue bao = Chinese journal of virology / [bian ji, Bing du xue bao bian ji wei yuan hui]	2012	Record concerns coronaviruses but describes neither a novel nor an attenuated coronavirus
18536105		[Evaluation of the protection conferred by several avian infectious bronchitis attenuated vaccines against the field strain CK/CH/LDL/97 I in China]	Zhagn XN, Wang Y, Li CR, Liu QR, Han Z, Shao YH, Liu SW, Kong XG.	Bing Du Xue Bao	2008	Report not retrieved
5531468		[Experimental and practical studies of the immunization of chickens against pseudo-plague with attenuated monovalent (pseudo-plague) or bivalent (pseudo-plague-infectious bronchitis) aerosol vaccine]	Pagnini P, Martone F, Compagnucci M.	Acta Med Vet (Napoli)	1970	The sequence of coronavirus described by the record is not known
3033910		[Experimental coronavirus encephalomyelitis in mice]	Maĭorova LP, Konovalov GV, Ogurtsov RP, Smorodintsev AA.	Vopr Virusol	1987	Record concerns coronaviruses but describes neither a novel nor an attenuated coronavirus
2990092		[Experiments to produce an attenuated strain of the transmissible gastroenteritis virus and its use as a live vaccine]	Motovski A, Katevska V, Belopopska P, Naĭdenova N, Veleva E.	Vet Med Nauki	1985	Report not retrieved
21462501		[Expression of green fluorescent protein using an infectious cDNA clone of infectious bronchitis virus].	Zhou S., Tang M.J., Dai Y.B., Liu M., Zhao B.H., Cheng X., Lu X.J.	Bing du xue bao = Chinese journal of virology / [bian ji, Bing du xue bao bian ji wei yuan hui]	2011	Record describes a novel non-attenuated coronavirus
16176106		[Expression of SARS spike gene in Shizomycete pombe]	Wu ZX, Zheng WL, Zhang B, Shi YX, Wen-Li.	Sheng Wu Gong Cheng Xue Bao	2005	Record concerns coronaviruses but describes neither a novel nor an attenuated coronavirus
531880		[Field experience of infectious bronchitis vaccination in broiler chickens (author's transl)]	Bollen L.	Tijdschr Diergeneeskd	1979	Record deals with coronavirus attenuation in only theoretical aspects
16816874		[Follow up study on viruses associated with SARS among the SARS patients]	Sun Y, Xin SJ, Shen HH, Hu Y, Xu DP, Zhu H, Zhu L, Duan Q, Mao PY.	Zhonghua Shi Yan He Lin Chuang Bing Du Xue Za Zhi	2006	Record concerns coronaviruses but describes neither a novel nor an attenuated coronavirus
18533344		[Genetic variation of S1 gene hypervariable region I of infectious bronchitis viruses isolated in different periods in Guangxi]	Wei ZJ, Wei P, Mo ML, Li M, Wei TC, Li KR.	Bing Du Xue Bao	2008	Report not retrieved
17894233		[Genetic variations of membrane gene of infectious bronchitis virus strains isolated in China between 1995 and 2004]	Nie L, Zhang QX, Han ZX, Shao YH, Rong JG, Liu SW, Kong XG.	Bing Du Xue Bao	2007	Report not retrieved
24923170		[Genotypes and serotypes of avian infectious bronchitis viruses isolated during 2009-2011 in Guangxi, China].	Qin L.L., Li M., Sun R., Wu Z.J., He K., Mo M.L., Wei T.C., Wei P.	Bing du xue bao = Chinese journal of virology / [bian ji, Bing du xue bao bian ji wei yuan hui]	2014	Record concerns coronaviruses but describes neither a novel nor an attenuated coronavirus
34563517	10.1016/j.pharma.2021.09.002	[HOSPITAL COMPOUNDING TO FACE SHORTAGE: A CASE STUDY OF THE DEVELOPMENT OF A LOPINAVIR-RITONAVIR ORAL SUSPENSION DURING THE FIRST WAVE OF SARS-COV-2 IN FRANCE]	Secretan PH, Thirion O, Saunier J, Razazi K, Paul M, Do B.	Ann Pharm Fr	2021	Record concerns coronaviruses but describes neither a novel nor an attenuated coronavirus
30001583		[Identification and Characterzation of the Porcine Epidemic Diarrhea Virus (PEDV) Isolates]	Tao J, Xiong N, Zhang C, Li B, Meng L, Liu H.	Bing Du Xue Bao	2016	Record describes a novel non-attenuated coronavirus
834542		[Increased frequency of CRD in the broiler production in northern Jutland. I. Possible connexion between increased frequency of CRD and recently started vaccination with live infectious bronchitis vaccine (Massachusetts type) in egg producing flocks (author's transl)]	Bisgaard M, Haugum E, Velling G.	Nord Vet Med	1977	Record concerns coronaviruses but describes neither a novel nor an attenuated coronavirus
19777806		[Induction of immune response after oral inoculation of mice with Lactobacillus casei surface-displayed porcine epidemic diarrhea viral N protein]	Ge J, Jiang Y, Wang M, Qiao X, Liu M, Tang L, Li Y.	Sheng Wu Gong Cheng Xue Bao	2009	Record concerns coronaviruses but describes neither a novel nor an attenuated coronavirus
5978158		[Infectious bronchitis of chicken. 3. Comparative studies on virulence and effectiveness of 4 live vaccines]	von Bülow V.	Zentralbl Veterinarmed B	1966	The sequence of coronavirus described by the record is not known
2994285		[Isolation and use of a farm-specific hyperimmune serum against transmissible gastroenteritis]	Motovski A, Belopopska P, Iordanov S, Veselinova I.	Vet Med Nauki	1985	Report not retrieved
2990094		[Isolation of the transmissible gastroenteritis virus in a continuous pig embryo kidney cell line]	Belopopska P, Motovski A.	Vet Med Nauki	1985	Report not retrieved
23757853		[Molecular characterization and phylogenetic analysis of porcine epidemic diarrhea virus field strains in central China during 2010-2012 outbreaks].	Zheng F.M., Huo J.Y., Zhao J., Chang H.T., Wang X.M., Chen L., Wang C.Q.	Bing du xue bao = Chinese journal of virology / [bian ji, Bing du xue bao bian ji wei yuan hui]	2013	Record concerns coronaviruses but describes neither a novel nor an attenuated coronavirus
5896794		[On the prophylactic vaccination against infectious bronchitis with live vaccine. 1. Virulence tests of the virus]	Bengelsdorff HJ, Schneider B.	Dtsch Tierarztl Wochenschr	1964	The sequence of coronavirus described by the record is not known
5896708		[On the prophylactic vaccination against infectious bronchitis with live vaccine. 2. Immunogenic behavior of the virus towards various field strains]	Bengelsdorff HJ, Schneider B.	Dtsch Tierarztl Wochenschr	1964	The sequence of coronavirus described by the record is not known
18770372	10.1080/03079457808418272	[Potency tests with HVT-, MHV- and JMV vaccines against Marek's disease]	Landgraf H, Vielitz E.	Avian Pathol	1978	Record does not concern coronaviruses
18271263		[Potent immune responses elicited by a bicistronic IBV DNA vaccine expressing S1 and IL-2 gene]	Tang MJ, Wang HN, Zhou S, Huang Y, Liu P.	Wei Sheng Wu Xue Bao	2007	Record concerns coronaviruses but describes neither a novel nor an attenuated coronavirus
15640862		[Potent neutralization antibody elicited in mice by SARS-associated coronavirus spike protein S1 domain]	Zhang Y, Yang F, Li YH, Li WH, Tu XM, Wei Q, Zhu H, Liu L, Wang H, Qin C, Yuan GY, He W, Wang SH.	Zhonghua Shi Yan He Lin Chuang Bing Du Xue Za Zhi	2004	Record concerns coronaviruses but describes neither a novel nor an attenuated coronavirus
35142124	10.13345/j.cjb.210196	[Preparation of bovine viral diarrhea disease virus 1 virus-like particles and evaluation of its immunogenicity in a guinea pig model]	Gao S, Zhang Z, Tian Z, Wang J, DU J, Guan G, Yin H.	Sheng Wu Gong Cheng Xue Bao	2022	Record concerns coronaviruses but describes neither a novel nor an attenuated coronavirus
34814611	10.3760/cma.j.cn112338-20210808-00619	[Progress in research of epidemiologic feature and control of SARS-CoV-2 Delta variant]	Du M, Liu M, Liu J.	Zhonghua Liu Xing Bing Xue Za Zhi	2021	Record concerns coronaviruses but describes neither a novel nor an attenuated coronavirus
23757838		[Prokaryotic expression and characterization of two recombinant receptor-binding domain(RBD) proteins of human coronavirus NL63(HcoV-NL63)].	Chang H., Yi Y., Zhao M., Zhou W.M., Zhao G.X., Wang H.J., Bi S.L., Gao J.M., Liu B., Tan W.J.	Bing du xue bao = Chinese journal of virology / [bian ji, Bing du xue bao bian ji wei yuan hui]	2013	Record concerns coronaviruses but describes neither a novel nor an attenuated coronavirus
25868282		[Rescue of the recombinant infectious bronchitis virus with the ectodomain region of H120 spike glycoprotein]	Wei YQ, Guo HC, Wang HM, Sun DH, Han SC, Sun SQ.	Bing Du Xue Bao	2014	Record describes coronavirus attenuation method that cannot be applied to SARS-CoV-2
14123607		[RESEARCH ON AN ATTENUATED VIRUS OF INFECTIOUS BRONCHITIS IN CHICKENS. IV. PRODUCTION OF SERO-NEUTRALIZING ANTIBODIES IN VACCINATED ANIMALS]	SCHIAVO A.	Boll Soc Ital Biol Sper	1963	The sequence of coronavirus described by the record is not known
14124841		[RESEARCH ON AN ATTENUATED VIRUS OF INFECTIOUS BRONCHITIS IN CHICKENS. V. PROPAGATION OF THE VIRUS IN VACCINATED AND NORMAL ANIMALS]	SCHIAVO A, BIONDI E.	Boll Soc Ital Biol Sper	1963	The sequence of coronavirus described by the record is not known
14090501		[RESEARCH ON AN ATTENUATED VIRUS OF INFECTIOUS BRONCHITIS OF CHICKENS. I. BEHAVIOR OF THE CHICK EMBRYO]	SCHIAVO A.	Boll Soc Ital Biol Sper	1963	The sequence of coronavirus described by the record is not known
14090502		[RESEARCH ON AN ATTENUATED VIRUS OF INFECTIOUS BRONCHITIS OF CHICKENS. II. BEHAVIOR (REACTION OF THE ORGANISM AND INCREASE IN WEIGHT) OF THE CHICKS]	SCHIAVO A.	Boll Soc Ital Biol Sper	1963	The sequence of coronavirus described by the record is not known
14090503		[RESEARCH ON AN ATTENUATED VIRUS OF INFECTIOUS BRONCHITIS OF CHICKENS. III. BEHAVIOR (REACTION OF THE ORGANISM AND EGG PRODUCTION) OF THE EGG-LAYERS]	SCHIAVO A.	Boll Soc Ital Biol Sper	1963	The sequence of coronavirus described by the record is not known
27295885		[Sequencing and Serologic Identification of S1 Genes of Infectious Bronchitis Viruses Isolated during 2012-2013 in Guangxi Province, China]	Zhang L, Wu C, Zhang Z, He Y, Li H, Qin L, Wei T, Mo M, Wei P.	Bing Du Xue Bao	2016	Record describes a novel non-attenuated coronavirus
5883988		[Study of vaccination against infectious bronchitis of chickens with live and attenuated virus of the Massachusetts and Connecticut strains]	Lombardi D.	Riv Ist Sieroter Ital	1965	The sequence of coronavirus described by the record is not known
16110944		[Study on the animal model for severe acute respiratory syndrome]	Liu BH, Wu DL, Zhan DW, Qin ED, Zhu QY, Wang CE, Meng QW, Peng WM, Yin XN, Yang YH, Guan YT, Han WG, Li CW, Liu YG, Wang MP, Liu QG, Shi HY, Ding ZF.	Wei Sheng Wu Xue Bao	2004	Record concerns coronaviruses but describes neither a novel nor an attenuated coronavirus
11712369		[Successful non-invasive positive pressure ventilation therapy to acute respiratory failure after volume reduction surgery for patient with severe emphysema: report of a case]	Noda M, Yamane Y, Usuda K, Ikeda M.	Kyobu Geka	2001	Record does not concern coronaviruses
19548531		[Synthesis in Escherichia coli cells and characterization of the active exoribonuclease of severe acute respiratory syndrome coronavirus]	Chen P, Hu T, Jiang M, Guo D.	Mol Biol (Mosk)	2009	Record concerns coronaviruses but describes neither a novel nor an attenuated coronavirus
179162		[The "Vaccination Reaction" syndrome of broilers after vaccination against Newcastle disease and infectious bronchitis (author's transl)]	Smits WH, Goren E, Litjens JB, Saes JM, Reuten FM.	Tijdschr Diergeneeskd	1976	The sequence of coronavirus described by the record is not known
21545043		[The specific features of the reproduction of the bovine coronavirus strain ARRIAH in the continuous RBT cell culture]	Dumova VV, Khlebopashnikova SV, Koropova NV, Manin BL, Ponomarev AP, Mishchenko VA.	Vopr Virusol	2011	Record concerns coronaviruses but describes neither a novel nor an attenuated coronavirus
32773024	10.1051/medsci/2020123	[Tracing the origins of SARS-COV-2 in coronavirus phylogenies]	Sallard E, Halloy J, Casane D, van Helden J, Decroly É.	Med Sci (Paris)	2020	Record concerns coronaviruses but describes neither a novel nor an attenuated coronavirus
6097154		[Transmissible gastroenteritis of swine: stability of coronavirus in gastric and intestinal contents]	Aynaud JM, Bottreau E.	Ann Rech Vet	1984	Record concerns coronaviruses but describes neither a novel nor an attenuated coronavirus
6097153		[Transmissible gastroenteritis: vaccination of sows in contaminated environment using inactivated virus in oil emulsion]	Aynaud JM, Vannier P, Martain L, Cariolet R.	Ann Rech Vet	1984	Record concerns coronaviruses but describes neither a novel nor an attenuated coronavirus
2994284		[Trials of peroral vaccination of newborn pigs against transmissible gastroenteritis (TGE)]	Motovski A, Belopopska P, Iordanov S.	Vet Med Nauki	1985	Report not retrieved
3020776		[Use of a microvirus-neutralizing reaction in diagnosing transmissible gastroenteritis (TGE)]	Belopopska P, Motovski A.	Vet Med Nauki	1986	Record concerns coronaviruses but describes neither a novel nor an attenuated coronavirus
34025046	10.1007/s00761-021-00972-1	[Vaccination against SARS-CoV-2 in cancer patients]	von Lilienfeld-Toal M, Rieger C, Giesen N, Wörmann B.	Onkologe (Berl)	2021	Record concerns coronaviruses but describes neither a novel nor an attenuated coronavirus
32379348	10.1002/jmv.25993	3CL hydrolase-based multiepitope peptide vaccine against SARS-CoV-2 using immunoinformatics	Jakhar R, Kaushik S, Gakhar SK.	J Med Virol	2020	Record concerns coronaviruses but describes neither a novel nor an attenuated coronavirus
	10.2118/188849-ms	3D SRME and interbed multiple attenuation on fully regularized common offset vector COV WAZ data from Kuwait single sensor survey	Jahdhami M.A., De Maag J.W., Mueller A., Narhari S.R., Kolawole O., Kidambi V.K., Al-Qadeeri B., Dashti Q.	Society of Petroleum Engineers - SPE Abu Dhabi International Petroleum Exhibition and Conference 2017	2017	Record does not concern coronaviruses
25979627	10.1177/1753425915586231	5-Aminoimidazole-4-carboxamide-1-β- D -ribofuranoside-attenuates LPS/ D -Gal-induced acute hepatitis in mice	Zhou D., Ai Q., Lin L., Gong X., Ge P., Che Q., Wan J., Wen A., Zhang L.	Innate Immunity	2015	Record does not concern coronaviruses
33123149	10.3389/fimmu.2020.572635	A "Window of Therapeutic Opportunity" for Anti-Cytokine Therapy in Patients With Coronavirus Disease 2019	De Stefano L, Bobbio-Pallavicini F, Manzo A, Montecucco C, Bugatti S.	Front Immunol	2020	Record concerns coronaviruses but describes neither a novel nor an attenuated coronavirus
20833270	10.1016/j.meegid.2010.09.002	A 15-year analysis of molecular epidemiology of avian infectious bronchitis coronavirus in China	Han Z., Sun C., Yan B., Zhang X., Wang Y., Li C., Zhang Q., Ma Y., Shao Y., Liu Q., Kong X., Liu S.	Infection, Genetics and Evolution	2011	Record concerns coronaviruses but describes neither a novel nor an attenuated coronavirus
	10.1128/MRA.00067-20	A 25-year-old sample contributes the complete genome sequence of avian coronavirus vaccine strain ARKDPI, reisolated from commercial broilers in the United States	Goraichuk I.V., Davis J.F., Kulkarni A.B., Afonso C.L., Suarez D.L.	Microbiology Resource Announcements	2020	Record concerns coronaviruses but describes neither a novel nor an attenuated coronavirus
35041639	10.12659/AJCR.935329	A 48-Year-Old Immunocompetent Female Resident of Southern Florida with Confirmed Reinfection with P.1 (Gamma) Variant of SARS-CoV-2	Kim M, Poon KK, Miller N, Rubio-Gomez H.	Am J Case Rep	2022	Record concerns coronaviruses but describes neither a novel nor an attenuated coronavirus
33217430	10.1016/j.antiviral.2020.104974	A bacterial artificial chromosome (BAC)-vectored noninfectious replicon of SARS-CoV-2	Zhang Y, Song W, Chen S, Yuan Z, Yi Z.	Antiviral Res	2021	Record describes a coronavirus that cannot replicate
34495697	10.1128/JVI.01126-21	A Bifluorescent-Based Assay for the Identification of Neutralizing Antibodies against SARS-CoV-2 Variants of Concern In Vitro and In Vivo	Chiem K, Morales Vasquez D, Silvas JA, Park JG, Piepenbrink MS, Sourimant J, Lin MJ, Greninger AL, Plemper RK, Torrelles JB, Walter MR, de la Torre JC, Kobie JK, Ye C, Martinez-Sobrido L.	J Virol	2021	Record concerns coronaviruses but describes neither a novel nor an attenuated coronavirus
34990583	10.1016/j.celrep.2021.110256	A bivalent nanoparticle vaccine exhibits potent cross-protection against the variants of SARS-CoV-2	Yuan Y, Zhang X, Chen R, Li Y, Wu B, Li R, Zou F, Ma X, Wang X, Chen Q, Deng J, Zhang Y, Chen T, Lin Y, Yan S, Zhang X, Li C, Bu X, Peng Y, Ke C, Deng K, Pan T, He X, Zhang Y, Zhang H.	Cell Rep	2022	Record concerns coronaviruses but describes neither a novel nor an attenuated coronavirus
34226895	10.1002/mco2.72	A bivalent recombinant vaccine targeting the S1 protein induces neutralizing antibodies against both SARS-CoV-2 variants and wild-type of the virus	He C, Yang J, He X, Hong W, Lei H, Chen Z, Shen G, Yang L, Li J, Wang Z, Song X, Wang W, Lu G, Wei X.	MedComm (2020)	2021	Record concerns coronaviruses but describes neither a novel nor an attenuated coronavirus
	10.1038/s41420-020-00376-x	A blood transcriptome-based analysis of disease progression, immune regulation, and symptoms in coronavirus-infected patients	Sadanandam A., Bopp T., Dixit S., Knapp D.J.H.F., Emperumal C.P., Vergidis P., Rajalingam K., Melcher A., Kannan N.	Cell Death Discovery	2020	Record concerns coronaviruses but describes neither a novel nor an attenuated coronavirus
33521747	10.1016/j.medj.2020.12.006	A booster dose enhances immunogenicity of the COVID-19 vaccine candidate ChAdOx1 nCoV-19 in aged mice	Silva-Cayetano A, Foster WS, Innocentin S, Belij-Rammerstorfer S, Spencer AJ, Burton OT, Fra-Bidó S, Le Lee J, Thakur N, Conceicao C, Wright D, Barrett J, Evans-Bailey N, Noble C, Bailey D, Liston A, Gilbert SC, Lambe T, Linterman MA.	Med (N Y)	2021	Record concerns coronaviruses but describes neither a novel nor an attenuated coronavirus
34726473	10.1126/scitranslmed.abj7125	A broadly cross-reactive antibody neutralizes and protects against sarbecovirus challenge in mice	Martinez DR, Schäfer A, Gobeil S, Li D, De la Cruz G, Parks R, Lu X, Barr M, Stalls V, Janowska K, Beaudoin E, Manne K, Mansouri K, Edwards RJ, Cronin K, Yount B, Anasti K, Montgomery SA, Tang J, Golding H, Shen S, Zhou T, Kwong PD, Graham BS, Mascola JR, Montefiori DC, Alam SM, Sempowski G, Sempowski GD, Khurana S, Wiehe K, Saunders KO, Acharya P, Haynes BF, Baric RS.	Sci Transl Med	2022	Record concerns coronaviruses but describes neither a novel nor an attenuated coronavirus
19382676		A candidate modified-live bovine coronavirus vaccine: Safety and immunogenicity evaluation	Decaro N., Campolo M., Mari V., Desario C., Colaianni M.L., Di Trani L., Cordioli P., Buonavoglia C.	New Microbiologica	2009	PASS	Report not retrieved
21273018	10.1016/j.braindev.2010.12.013	A case of clinically mild encephalitis with a reversible splenial lesion (MERS) after mumps vaccination	Hara M., Mizuochi T., Kawano G., Koike T., Shibuya I., Ohya T., Ohbu K., Nagai K., Nagamitsu S., Yamashita Y., Nakayama T., Matsuishi T.	Brain and Development	2011	Record concerns coronaviruses but describes neither a novel nor an attenuated coronavirus
34956160	10.3389/fmicb.2021.792514	A Case Report: Genetically Distinct Severe Acute Respiratory Syndrome Coronavirus-2 Variant Causing Reinfection	Hossain ME, Rahman MM, Alam MS, Sarmin M, Karim Y, Hasan M, Hoque AF, Hasan MM, Rahman MZ, Chisti MJ, Rahman M.	Front Microbiol	2021	Record describes a novel non-attenuated coronavirus
32693757	10.2174/1381612826666200720233947	A Case Study: Analysis of Patents on Coronaviruses and Covid-19 for Technological Assessment and Future Research	Musyuni P, Aggarwal G, Nagpal M, Goyal RK.	Curr Pharm Des	2021	Record is a review on coronavirus attenuation
18533276	10.1016/j.imlet.2008.04.005	A chimeric multi-epitope DNA vaccine elicited specific antibody response against severe acute respiratory syndrome-associated coronavirus which attenuated the virulence of SARS-CoV in vitro	Wang X., Xu W., Tong D., Ni J., Gao H., Wang Y., Chu Y., Li P., Yang X., Xiong S.	Immunology Letters	2008	Record concerns coronaviruses but describes neither a novel nor an attenuated coronavirus
35126879	10.1007/s12274-021-4012-9	A chitosan-mediated inhalable nanovaccine against SARS-CoV-2	Zhuo SH, Wu JJ, Zhao L, Li WH, Zhao YF, Li YM.	Nano Res	2022	Record concerns coronaviruses but describes neither a novel nor an attenuated coronavirus
	10.1080/03079458508436252	A clearance test to assess protection in chickens vaccinated against avian infectious bronchitis virus	Darbyshire J.H.	Avian Pathology	1985	PASS	The sequence of coronavirus described by the record is not known
12882681		A clinicopathological study on 3 cases of severe acute respiratory syndrome	Lang Z.W., Zhang L.J., Zhang S.J., Meng X., Li J.Q., Song C.Z., Sun L., Zhou Y.S.	Zhonghua bing li xue za zhi Chinese journal of pathology	2003	Record concerns coronaviruses but describes neither a novel nor an attenuated coronavirus
32719001	10.1126/scitranslmed.abc7075	A colorimetric RT-LAMP assay and LAMP-sequencing for detecting SARS-CoV-2 RNA in clinical samples	Dao Thi VL, Herbst K, Boerner K, Meurer M, Kremer LP, Kirrmaier D, Freistaedter A, Papagiannidis D, Galmozzi C, Stanifer ML, Boulant S, Klein S, Chlanda P, Khalid D, Barreto Miranda I, Schnitzler P, Kräusslich HG, Knop M, Anders S.	Sci Transl Med	2020	Record concerns coronaviruses but describes neither a novel nor an attenuated coronavirus
	10.17582/JOURNAL.PJZ/20190424090449	A comparative assessment of efficacy of currently applied vaccines in broiler chicken against individual and co-infection with field prevailing newcastle disease and infectious bronchitis viruses	Imran M.S., Aslam A., Yasin M., Yaqoob T., Zahid B.	Pakistan Journal of Zoology	2020	PASS	The sequence of coronavirus described by the record is not known
1966439	10.1007/978-1-4684-5823-7_64	A comparison of bovine coronavirus strains using monoclonal antibodies	Clark MA, Campbell I, El-Ghorr AA, Snodgrass DR, Scott FM.	Adv Exp Med Biol	1990	Report not retrieved
1877886	10.1007/BF01310668	A comparison of the sensitivity and specificity of sialodacryoadenitis virus, Parker's rat coronavirus, and mouse hepatitis virus-infected cells as a source of antigen for the detection of antibody to rat coronaviruses	Percy D.H., Williams K.L., Paturzo F.X.	Archives of Virology	1991	Record concerns coronaviruses but describes neither a novel nor an attenuated coronavirus
8837889	10.1016/0168-1702(95)00100-X	A conditional-lethal murine coronavirus mutant that fails to incorporate the spike glycoprotein into assembled virions	Ricard C.S., Koetzner C.A., Sturman L.S., Masters P.S.	Virus Research	1995	PASS	The sequence of coronavirus described by the record is not known
31350335	10.1074/jbc.RA119.009713	A conserved region of nonstructural protein 1 from alphacoronaviruses inhibits host gene expression and is critical for viral virulence	Shen Z., Wang G., Yang Y., Shi J., Fang L., Li F., Xiao S., Fu Z.F., Peng G.	Journal of Biological Chemistry (2019) 294:37 (13606-13618). Date of Publication: 13 Sep 2019	2019	Record describes coronavirus attenuation method that cannot be applied to SARS-CoV-2
8725098	10.1016/0168-1702(95)01265-6	A continuous epitope from transmissible gastroenteritis virus S protein fused to E. coli heat-labile toxin B subunit expressed by attenuated Salmonella induces serum and secretory immunity	Smerdou C., Anton I.M., Plana J., Curtiss III R., Enjuanes L.	Virus Research	1996	Record concerns coronaviruses but describes neither a novel nor an attenuated coronavirus
26136577	10.1128/JVI.01237-15	A Coronavirus E Protein Is Present in Two Distinct Pools with Different Effects on Assembly and the Secretory Pathway	Westerbeck, JW; Machamer, CE	JOURNAL OF VIROLOGY	2015	Record concerns coronaviruses but describes neither a novel nor an attenuated coronavirus
32353696	10.1016/j.psychres.2020.113000	A crisis within the crisis: The mental health situation of refugees in the world during the 2019 coronavirus (2019-nCoV) outbreak	Júnior JG, de Sales JP, Moreira MM, Pinheiro WR, Lima CKT, Neto MLR.	Psychiatry Res	2020	Record concerns coronaviruses but describes neither a novel nor an attenuated coronavirus
16007097	10.1038/nm1267	A crucial role of angiotensin converting enzyme 2 (ACE2) in SARS coronavirus-induced lung injury	Kuba K., Imai Y., Rao S., Gao H., Guo F., Guan B., Huan Y., Yang P., Zhang Y., Deng W., Bao L., Zhang B., Liu G., Wang Z., Chappell M., Liu Y., Zheng D., Leibbrandt A., Wada T., Slutsky A.S., Liu D., Qin C., Jiang C., Penninger J.M.	Nature Medicine	2005	Record concerns coronaviruses but describes neither a novel nor an attenuated coronavirus
11567758	10.1016/S0264-410X(01)00272-9	A crucial role of macrophages in the immune responses to oral DNA vaccination against hepatitis B virus in a murine model	Zheng B.-J., Woo P.C.Y., Ng M.-H., Tsoi H.-W., Wong L.-P., Yuen K.-Y.	Vaccine	2001	Record does not concern coronaviruses
33009914	10.1093/database/baaa070	A database resource and online analysis tools for coronaviruses on a historical and global scale	Zhu Z, Meng K, Liu G, Meng G.	Database (Oxford)	2021	Record concerns coronaviruses but describes neither a novel nor an attenuated coronavirus
21937658	10.1128/JVI.06048-11	A double-inactivated severe acute respiratory syndrome coronavirus vaccine provides incomplete protection in mice and induces increased eosinophilic proinflammatory pulmonary response upon challenge	Bolles M., Deming D., Long K., Agnihothram S., Whitmore A., Ferris M., Funkhouser W., Gralinski L., Totura A., Heise M., Baric R.S.	Journal of Virology	2011	Record concerns coronaviruses but describes neither a novel nor an attenuated coronavirus
2994526		A double-protease-resistant variant of transmissible gastroenteritis virus and its ability to induce lactogenic immunity.	Chen K.S., Kahn D.E.	American Journal of Veterinary Research	1985	PASS	Report not retrieved
32190908	10.1002/jmv.25773	A doubt of multiple introduction of SARS-CoV-2 in Italy: A preliminary overview	Giovanetti M., Angeletti S., Benvenuto D., Ciccozzi M.	Journal of Medical Virology	2020	Record concerns coronaviruses but describes neither a novel nor an attenuated coronavirus
23810983	10.1016/j.mcp.2013.06.001	A duplex SYBR Green I-based real-time RT-PCR assay for the simultaneous detection and differentiation of Massachusetts and non-Massachusetts serotypes of infectious bronchitis virus	Acevedo A.M., Perera C.L., Vega A., Ríos L., Coronado L., Relova D., Frías M.T., Ganges L., Núñez J.I., Pérez L.J.	Molecular and Cellular Probes	2013	Record concerns coronaviruses but describes neither a novel nor an attenuated coronavirus
22619553	10.2147/IJN.S31379	A facile inhibitor screening of SARS coronavirus N protein using nanoparticle-based RNA oligonucleotide	Roh C.	International Journal of Nanomedicine	2012	Record concerns coronaviruses but describes neither a novel nor an attenuated coronavirus
2985213		A field trial to evaluate the efficacy of a combined rotavirus-coronavirus/Escherichia coli vaccine in dairy cattle	Waltner-Toews D., Martin S.W., Meek A.H., McMillan I., Crouch C.F.	Canadian Journal of Comparative Medicine	1985	PASS	The sequence of coronavirus described by the record is not known
32253616	10.1007/s00705-020-04567-w	A flagellin-adjuvanted inactivated porcine epidemic diarrhea virus (PEDV) vaccine provides enhanced immune protection against PEDV challenge in piglets	Xu X., Du L., Fan B., Sun B., Zhou J., Guo R., Yu Z., Shi D., He K., Li B.	Archives of Virology	2020	Record concerns coronaviruses but describes neither a novel nor an attenuated coronavirus
30688313	10.3791/58892	A fluorogenic peptide cleavage assay to screen for proteolytic activity: Applications for coronavirus spike protein activation	Jaimes J.A., Millet J.K., Goldstein M.E., Whittaker G.R., Straus M.R.	Journal of Visualized Experiments	2019	Record concerns coronaviruses but describes neither a novel nor an attenuated coronavirus
15774184		A follow-up study of the lung function and the chest CT changes in medical staff with severe acute respiratory syndrome in Beijing	He Z.-Y.	Zhonghua Jiehe he Huxi Zazhi	2005	Record concerns coronaviruses but describes neither a novel nor an attenuated coronavirus
33958056	10.1016/j.mayocp.2021.03.010	A Framework for Outpatient Infusion of Antispike Monoclonal Antibodies to High-Risk Patients with Mild-to-Moderate Coronavirus Disease-19: The Mayo Clinic Model	Razonable RR, Aloia NCE, Anderson RJ, Anil G, Arndt LL, Arndt RF, Ausman SE, Bell SJ, Bierle DM, Billings ML, Bishop RK, Cramer CH, Culbertson TL, Dababneh AS, Derr AN, Epps K, Flaker SM, Ganesh R, Gilmer MA, Urena EG, Gulden CR, Haack TL, Hanson SN, Herzog JR, Heyliger A, Hokanson LD, Hopkins LH, Horecki RJ, Krishna BH, Huskins WC, Jackson TA, Johnson RR, Jorgenson B, Kudrna C, Kennedy BD, Kling…	Mayo Clin Proc	2021	Record concerns coronaviruses but describes neither a novel nor an attenuated coronavirus
34006662	10.1128/mBio.00902-21	A Generic, Scalable, and Rapid Time-Resolved Förster Resonance Energy Transfer-Based Assay for Antigen Detection-SARS-CoV-2 as a Proof of Concept	Rusanen J, Kareinen L, Szirovicza L, Uğurlu H, Levanov L, Jääskeläinen A, Ahava M, Kurkela S, Saksela K, Hedman K, Vapalahti O, Hepojoki J.	mBio	2021	Record concerns coronaviruses but describes neither a novel nor an attenuated coronavirus
34812651	10.1128/mSystems.01087-21	A Genetic Trap in Yeast for Inhibitors of SARS-CoV-2 Main Protease	Alalam H, Sigurdardóttir S, Bourgard C, Tiukova I, King RD, Grøtli M, Sunnerhagen P.	mSystems	2021	Record concerns coronaviruses but describes neither a novel nor an attenuated coronavirus
		A genetically attenuated feline coronavirus vaccine: protection against feline infectious peritonitis (FIP) by cellular rather than by virus-neutralizing immunity	Haijema, BJ; Schellen, P; Egberink, HF; Rottier, PJM	VACCINE	2008	PASS	Report not retrieved
21382166	10.1111/j.1478-3231.2011.02469.x	A glycyrrhizin-containing preparation reduces hepatic steatosis induced by hepatitis C virus protein and iron in mice	Korenaga M., Hidaka I., Nishina S., Sakai A., Shinozaki A., Gondo T., Furutani T., Kawano H., Sakaida I., Hino K.	Liver International	2011	Record does not concern coronaviruses
	10.3390/cancers13030407	A hepatitis b virus-derived peptide exerts an anticancer effect via TNF/iNOS-producing dendritic cells in tumor-bearing mouse model	Yang S.-B., Lee M.-H., Kim B.-R., Choi Y.-M., Kim B.-J.	Cancers	2021	Record does not concern coronaviruses
19347304	10.1007/978-1-59745-447-6_14	A hepatitis C virus xenograft mouse efficacy model	Zhu Q, Weiner AJ.	Methods Mol Biol	2009	Record does not concern coronaviruses
30541859	10.1128/JVI.01586-18	A highly attenuated vesicular stomatitis virus-based vaccine platform controls hepatitis B virus replication in mouse models of hepatitis B	Moshkani S., Chiale C., Lang S.M., Rose J.K., Robek M.D.	Journal of Virology	2019	Record does not concern coronaviruses
8572941	10.1007/BF01323240	A highly conserved epitope on the spike protein of infectious bronchitis virus	Wang L, Parr RL, King DJ, Collisson EW.	Arch Virol	1995	Record concerns coronaviruses but describes neither a novel nor an attenuated coronavirus
34950151	10.3389/fimmu.2021.789905	A Highly Conserved Peptide Vaccine Candidate Activates Both Humoral and Cellular Immunity Against SARS-CoV-2 Variant Strains	Gao F, Huang J, Li T, Hu C, Shen M, Mu S, Luo F, Song S, Hao Y, Wang W, Han X, Qian C, Wang Y, Wu R, Li L, Li S, Jin A.	Front Immunol	2021	Record concerns coronaviruses but describes neither a novel nor an attenuated coronavirus
24884408	10.1186/1471-2105-15-161	A highly conserved WDYPKCDRA epitope in the RNA directed RNA polymerase of human coronaviruses can be used as epitope-based universal vaccine design	Sharmin R., Islam A.B.M.M.K.	BMC Bioinformatics	2014	Record concerns coronaviruses but describes neither a novel nor an attenuated coronavirus
26355094	10.1128/JVI.01815-15	A highly immunogenic and protective middle east respiratory syndrome coronavirus vaccine based on a recombinant measles virus vaccine platform	Malczyk A.H., Kupke A., Prüfer S., Scheuplein V.A., Hutzler S., Kreuz D., Beissert T., Bauer S., Hubich-Rau S., Tondera C., Eldin H.S., Schmidt J., Vergara-Alert J., Süzer Y., Seifried J., Hanschmann K.-M., Kalinke U., Herold S., Sahin U., Cichutek K., Waibler Z., Eickmann M., Becker S., Mühlebach M.D.	Journal of Virology	2015	Record concerns coronaviruses but describes neither a novel nor an attenuated coronavirus
33207263	10.1016/j.virusres.2020.198229	A highly pathogenic recombinant infectious bronchitis virus with adaptability in cultured cells	Huang M, Liu Y, Zou C, Tan Y, Han Z, Xue C, Cao Y.	Virus Res	2021	Record describes a novel non-attenuated coronavirus
29569144	10.1007/s12250-018-0003-8	A Highly Pathogenic Strain of Porcine Deltacoronavirus Caused Watery Diarrhea in Newborn Piglets	Xu Z., Zhong H., Zhou Q., Du Y., Chen L., Zhang Y., Xue C., Cao Y.	Virologica Sinica	2018	Record describes a novel non-attenuated coronavirus
34257144	10.1126/scitranslmed.abi8452	A high-throughput cell- and virus-free assay shows reduced neutralization of SARS-CoV-2 variants by COVID-19 convalescent plasma	Fenwick C, Turelli P, Pellaton C, Farina A, Campos J, Raclot C, Pojer F, Cagno V, Nusslé SG, D'Acremont V, Fehr J, Puhan M, Pantaleo G, Trono D.	Sci Transl Med	2021	Record concerns coronaviruses but describes neither a novel nor an attenuated coronavirus
33831132	10.1371/journal.ppat.1009453	A human coronavirus evolves antigenically to escape antibody immunity	Eguia RT, Crawford KHD, Stevens-Ayers T, Kelnhofer-Millevolte L, Greninger AL, Englund JA, Boeckh MJ, Bloom JD.	PLoS Pathog	2021	Record concerns coronaviruses but describes neither a novel nor an attenuated coronavirus
19846189	10.1016/j.virol.2009.09.026	A human coronavirus OC43 variant harboring persistence-associated mutations in the S glycoprotein differentially induces the unfolded protein response in human neurons as compared to wild-type virus	Favreau D.J., Desforges M., St-Jean J.R., Talbot P.J.	Virology	2009	Record describes coronavirus attenuation method that cannot be applied to SARS-CoV-2
17093194	10.1128/JVI.00803-06	A hypervariable region within the 3′ cis-acting element of the murine coronavirus genome is nonessential for RNA synthesis but affects pathogenesis	Goebel S.J., Miller T.B., Bennett C.J., Bernard K.A., Masters P.S.	Journal of Virology	2007	PASS	Record describes coronavirus attenuation method that cannot be applied to SARS-CoV-2
33094371	10.1007/s00604-020-04582-3	A label-free electrochemical assay for coronavirus IBV H120 strain quantification based on equivalent substitution effect and AuNPs-assisted signal amplification	Yang Y, Yang D, Shao Y, Li Y, Chen X, Xu Y, Miao J.	Mikrochim Acta	2020	Record concerns coronaviruses but describes neither a novel nor an attenuated coronavirus
24349214	10.1371/journal.pone.0082176	A leaderless genome identified during persistent bovine coronavirus infection is associated with attenuation of gene expression	Ke T.-Y., Liao W.-Y., Wu H.-Y.	PLoS ONE	2013	Record describes a coronavirus that cannot replicate
32497257	10.1111/bph.15154	A lesson from a saboteur: High-MW kininogen impact in coronavirus-induced disease 2019	Colarusso, C; Terlizzi, M; Pinto, A; Sorrentino, R	BRITISH JOURNAL OF PHARMACOLOGY	2020	Record concerns coronaviruses but describes neither a novel nor an attenuated coronavirus
18463152	10.1128/JVI.00304-08	A live attenuated severe acute respiratory syndrome coronavirus is immunogenic and efficacious in Golden Syrian hamsters	Lamirande E.W., DeDiego M.L., Roberts A., Jackson J.P., Alvarez E., Sheahan T., Shieh W.-J., Zaki S.R., Baric R., Enjuanes L., Subbarao K.	Journal of Virology	2008	PASS	PASS
	10.1038/s41467-021-26506-2	A live measles-vectored COVID-19 vaccine induces strong immunity and protection from SARS-CoV-2 challenge in mice and hamsters	Frantz P.N., Barinov A., Ruffié C., Combredet C., Najburg V., de Melo G.D., Larrous F., Kergoat L., Teeravechyan S., Jongkaewwattana A., Billon-Denis E., Tournier J.-N., Prot M., Levillayer L., Conquet L., Montagutelli X., Tichit M., Hardy D., Fernandes P., Strick-Marchand H., Di Santo J., Simon-Lorière E., Bourhy H., Tangy F.	Nature Communications	2021	Record concerns coronaviruses but describes neither a novel nor an attenuated coronavirus
23142821	10.1038/nm.2972	A live, impaired-fidelity coronavirus vaccine protects in an aged, immunocompromised mouse model of lethal disease	Graham R.L., Becker M.M., Eckerle L.D., Bolles M., Denison M.R., Baric R.S.	Nature Medicine	2012	Record describes coronavirus attenuation method that cannot be applied to SARS-CoV-2
33408342	10.1038/s41423-020-00588-2	A longitudinal study of SARS-CoV-2-infected patients reveals a high correlation between neutralizing antibodies and COVID-19 severity	Legros V, Denolly S, Vogrig M, Boson B, Siret E, Rigaill J, Pillet S, Grattard F, Gonzalo S, Verhoeven P, Allatif O, Berthelot P, Pélissier C, Thiery G, Botelho-Nevers E, Millet G, Morel J, Paul S, Walzer T, Cosset FL, Bourlet T, Pozzetto B.	Cell Mol Immunol	2021	Record concerns coronaviruses but describes neither a novel nor an attenuated coronavirus
		A longitudinal study of the incidence of Avian Infectious Bronchitis in France using strain-specific haemagglutination inhibition tests and cluster analysis	Auvigne V., Gibaud S., Léger L., Malher X., Currie R., Riggi A.	Revue de Medecine Veterinaire	2013	Record concerns coronaviruses but describes neither a novel nor an attenuated coronavirus
29780039	10.1292/jvms.18-0050	A long-term animal experiment indicating persistent infection of bovine coronavirus in cattle	Kanno T., Ishihara R., Hatama S., Uchida I.	Journal of Veterinary Medical Science	2018	Record concerns coronaviruses but describes neither a novel nor an attenuated coronavirus
	10.1080/03079459708419233	A long-term study of Australian infectious bronchitis viruses indicates a major antigenic change in recently isolated strains	Ignjatovic J., Sapats S.I., Ashton F.	Avian Pathology	1997	Record describes a novel non-attenuated coronavirus
33547083	10.1126/sciadv.abe5819	A lymph node-targeted Amphiphile vaccine induces potent cellular and humoral immunity to SARS-CoV-2	Steinbuck MP, Seenappa LM, Jakubowski A, McNeil LK, Haqq CM, DeMuth PC.	Sci Adv	2021	Record concerns coronaviruses but describes neither a novel nor an attenuated coronavirus
27886052	10.3390/ijms17111880	A Melting Curve-Based Multiplex RT-qPCR Assay for Simultaneous Detection of Four Human Coronaviruses	Wan Z, Zhang Y, He Z, Liu J, Lan K, Hu Y, Zhang C.	Int J Mol Sci	2016	Record concerns coronaviruses but describes neither a novel nor an attenuated coronavirus
33821247	10.1016/S2666-5247(21)00059-8	A method for detection of SARS-CoV-2 RNA in healthy human stool: a validation study	Coryell MP, Iakiviak M, Pereira N, Murugkar PP, Rippe J, Williams DB, Heald-Sargent T, Sanchez-Pinto LN, Chavez J, Hastie JL, Sava RL, Lien CZ, Wang TT, Muller WJ, Fischbach MA, Carlson PE Jr.	Lancet Microbe	2021	Record concerns coronaviruses but describes neither a novel nor an attenuated coronavirus
34379509	10.1128/JVI.00592-21	A methyltransferase-defective vesicular stomatitis virus-based SARS-CoV-2 vaccine candidate provides complete protection against SARS-CoV-2 infection in hamsters	Lu M., Zhang Y., Dravid P., Li A., Zeng C., Mahesh K.C., Trivedi S., Sharma H., Chaiwatpongsakorn S., Zani A., Kenney A., Cai C., Ye C., Liang X., Qiu J., Martinez-Sobrido L., Yount J.S., Boyaka P.N., Liu S.-L., Peeples M.E., Kapoor A., Li J.	Journal of Virology	2021	Record concerns coronaviruses but describes neither a novel nor an attenuated coronavirus
	10.3389/fvets.2019.00347	A Minimally Replicative Vaccine Protects Vaccinated Piglets Against Challenge With the Porcine Epidemic Diarrhea Virus	Singh G., Singh P., Pillatzki A., Nelson E., Webb B., Dillberger-Lawson S., Ramamoorthy S.	Frontiers in Veterinary Science	2019	Record describes a coronavirus that cannot replicate
2162161	10.1007/BF01311056	A model for determining immunogenic relationships between avian infectious bronchitis viruses	Arvidson Y., Tannock G.A., Senthilselvan A., Zerbes M.	Archives of Virology	1990	Record concerns coronaviruses but describes neither a novel nor an attenuated coronavirus
9782321	10.1007/978-1-4615-5331-1_64	A monoclonal antibody blocking ELISA for the detection of IBV antibodies in fowl	Moving V, Czifra G, Renström L.	Adv Exp Med Biol	1998	Record concerns coronaviruses but describes neither a novel nor an attenuated coronavirus
24667706	10.1128/mBio.00047-14	A mouse model for Betacoronavirus subgroup 2c using a bat coronavirus strain HKU5 variant	Agnihothram S, Yount BL Jr, Donaldson EF, Huynh J, Menachery VD, Gralinski LE, Graham RL, Becker MM, Tomar S, Scobey TD, Osswald HL, Whitmore A, Gopal R, Ghosh AK, Mesecar A, Zambon M, Heise M, Denison MR, Baric RS.	mBio	2014	PASS	Record describes a novel non-attenuated coronavirus
20124411	10.1124/jpet.109.164541	A mouse model of severe halothane hepatitis based on human risk factors	Dugan C.M., MacDonald A.E., Roth R.A., Ganey P.E.	Journal of Pharmacology and Experimental Therapeutics	2010	Record does not concern coronaviruses
17222058	10.1371/journal.ppat.0030005	A mouse-adapted SARS-coronavirus causes disease and mortality in BALB/c mice	Roberts A, Deming D, Paddock CD, Cheng A, Yount B, Vogel L, Herman BD, Sheahan T, Heise M, Genrich GL, Zaki SR, Baric R, Subbarao K.	PLoS Pathog	2007	Record describes a novel non-attenuated coronavirus
	10.12688/wellcomeopenres.15936.1	A multi centre randomized open label trial of chloroquine for the treatment of adults with SARS-CoV-2 infection in Vietnam	Kestelyn E., Dung N.T.P., Lam Minh Y., Hung L.M., Quan N.M., Dung N.T., Minh N.N.Q., Xuan T.C., Phong N.T., Ninh Thi Thanh V., Donovan J., Tu T.N.H., Nhat L.T.H., Truong N.T., Man D.N.H., Thao H.P., Ngoc N.M., Lam V.T., Phat H.H., Phuong P.M., Geskus R.B., Ha V.T.N., Quang N.N., Tran Tinh H., Tan L.V., Thwaites G.E., Day J.N., Chau N.V.V.	Wellcome Open Research	2020	Record concerns coronaviruses but describes neither a novel nor an attenuated coronavirus
34268131	10.3389/fcimb.2021.653616	A Multiplex and Colorimetric Reverse Transcription Loop-Mediated Isothermal Amplification Assay for Sensitive and Rapid Detection of Novel SARS-CoV-2	Juscamayta-López E, Valdivia F, Horna H, Tarazona D, Linares L, Rojas N, Huaringa M.	Front Cell Infect Microbiol	2021	Record concerns coronaviruses but describes neither a novel nor an attenuated coronavirus
20408407	10.1637/8954-060609-Reg.1	A multiplex reverse transcriptase-PCR assay for the genotyping of avian infectious bronchitis viruses.	Chen H.W., Wang C.H.	Avian diseases	2010	Record concerns coronaviruses but describes neither a novel nor an attenuated coronavirus
29501635	10.1016/j.nano.2018.02.010	A nano silicon adjuvant enhances inactivated transmissible gastroenteritis vaccine through activation the Toll-like receptors and promotes humoral and cellular immune responses	Jin XH, Zheng LL, Song MR, Xu WS, Kou YN, Zhou Y, Zhang LW, Zhu YN, Wan B, Wei ZY, Zhang GP.	Nanomedicine	2018	Record concerns coronaviruses but describes neither a novel nor an attenuated coronavirus
33925446	10.3390/vaccines9050431	A Nanoscaffolded Spike-RBD Vaccine Provides Protection against SARS-CoV-2 with Minimal Anti-Scaffold Response	Lainšček D, Fink T, Forstnerič V, Hafner-Bratkovič I, Orehek S, Strmšek Ž, Manček-Keber M, Pečan P, Esih H, Malenšek Š, Aupič J, Dekleva P, Plaper T, Vidmar S, Kadunc L, Benčina M, Omersa N, Anderluh G, Pojer F, Lau K, Hacker D, Correia BE, Peterhoff D, Wagner R, Bergant V, Herrmann A, Pichlmair A, Jerala R.	Vaccines (Basel)	2021	Record concerns coronaviruses but describes neither a novel nor an attenuated coronavirus
20668085	10.1128/JVI.00901-10	A new cistron in the murine hepatitis virus replicase gene	Stokes H.L., Baliji S., Hui C.G., Sawicki S.G., Baker S.C., Siddell S.G.	Journal of Virology	2010	PASS	The sequence of coronavirus described by the record is not known
15223561	10.1080/0307945042000220697	A new genotype of nephropathogenic infectious bronchitis virus circulating in vaccinated and non-vaccinated flocks in China	Liu S, Kong X.	Avian Pathol	2004	Record describes a novel non-attenuated coronavirus
33500361	10.1128/JCM.02438-20	A New SARS-CoV-2 Dual-Purpose Serology Test: Highly Accurate Infection Tracing and Neutralizing Antibody Response Detection	Taylor SC, Hurst B, Charlton CL, Bailey A, Kanji JN, McCarthy MK, Morrison TE, Huey L, Annen K, DomBourian MG, Knight V.	J Clin Microbiol	2021	Record concerns coronaviruses but describes neither a novel nor an attenuated coronavirus
33500453	10.1038/s41598-021-81245-0	A new SYBR Green real-time PCR to detect SARS-CoV-2	Marinowic DR, Zanirati G, Rodrigues FVF, Grahl MVC, Alcará AM, Machado DC, Da Costa JC.	Sci Rep	2021	Record concerns coronaviruses but describes neither a novel nor an attenuated coronavirus
	10.1038/s41467-021-26499-y	A Newcastle disease virus expressing a stabilized spike protein of SARS-CoV-2 induces protective immune responses	Sun W., Liu Y., Amanat F., González-Domínguez I., McCroskery S., Slamanig S., Coughlan L., Rosado V., Lemus N., Jangra S., Rathnasinghe R., Schotsaert M., Martinez J.L., Sano K., Mena I., Innis B.L., Wirachwong P., Thai D.H., Oliveira R.D.N., Scharf R., Hjorth R., Raghunandan R., Krammer F., García-Sastre A., Palese P.	Nature Communications	2021	Record concerns coronaviruses but describes neither a novel nor an attenuated coronavirus
8209734	10.1007/978-1-4615-2996-5_35	A newly identified MHV-A59 ORF1a polypeptide p65 is temperature sensitive in two RNA negative mutants	Hughes S.A., Denison M.R., Bonilla P., Leibowitz J.L., Baric R.S., Weiss S.R.	Advances in Experimental Medicine and Biology	1994	PASS	Report not retrieved
8209734		A NEWLY IDENTIFIED MHV-A59 ORF1A POLYPEPTIDE P65 IS TEMPERATURE-SENSITIVE IN 2 RNA NEGATIVE MUTANTS	HUGHES, SA; DENISON, MR; BONILLA, P; LEIBOWITZ, JL; BARIC, RS; WEISS, SR	CORONAVIRUSES: MOLECULAR BIOLOGY AND VIRUS-HOST INTERACTIONS	1993	The sequence of coronavirus described by the record is not known
30342075	10.1016/j.virusres.2018.10.012	A newly isolated Chinese virulent genotype GIIb porcine epidemic diarrhea virus strain: Biological characteristics, pathogenicity and immune protective effects as an inactivated vaccine candidate	Liu X., Zhang Q., Zhang L., Zhou P., Yang J., Fang Y., Dong Z., Zhao D., Li W., Feng J., Cui B., Zhang Y., Wang Y.	Virus Research	2019	Record describes a novel non-attenuated coronavirus
34429424	10.1038/s41467-021-25387-9	A non-enzymatic, isothermal strand displacement and amplification assay for rapid detection of SARS-CoV-2 RNA	Mohammadniaei M, Zhang M, Ashley J, Christensen UB, Friis-Hansen LJ, Gregersen R, Lisby JG, Benfield TL, Nielsen FE, Henning Rasmussen J, Pedersen EB, Olinger ACR, Kolding LT, Naseri M, Zheng T, Wang W, Gorodkin J, Sun Y.	Nat Commun	2021	Record concerns coronaviruses but describes neither a novel nor an attenuated coronavirus
32219056	10.1007/s12668-016-0341-7	A Novel Antiviral Strategy against MERS-CoV and HCoV-229E Using Binase to Target Viral Genome Replication	Müller C, Ulyanova V, Ilinskaya O, Pleschka S, Shah Mahmud R.	Bionanoscience	2017	Record concerns coronaviruses but describes neither a novel nor an attenuated coronavirus
33865990	10.1016/j.clim.2021.108730	A novel application of delayed-type hipersensitivity reaction to measure cellular immune response in SARS-CoV-2 exposed individuals	Barrios Y, Franco A, Sanchez-Machin I, Poza-Guedes P, Gonzalez-Perez R, Matheu V.	Clin Immunol	2021	Record concerns coronaviruses but describes neither a novel nor an attenuated coronavirus
31526383	10.1186/s12951-019-0531-x	A novel biotinylated nanobody-based blocking ELISA for the rapid and sensitive clinical detection of porcine epidemic diarrhea virus	Ma Z, Wang T, Li Z, Guo X, Tian Y, Li Y, Xiao S.	J Nanobiotechnology	2019	Record concerns coronaviruses but describes neither a novel nor an attenuated coronavirus
12690092	10.1056/NEJMoa030781	A novel coronavirus associated with severe acute respiratory syndrome	Ksiazek TG, Erdman D, Goldsmith CS, Zaki SR, Peret T, Emery S, Tong S, Urbani C, Comer JA, Lim W, Rollin PE, Dowell SF, Ling AE, Humphrey CD, Shieh WJ, Guarner J, Paddock CD, Rota P, Fields B, DeRisi J, Yang JY, Cox N, Hughes JM, LeDuc JW, Bellini WJ, Anderson LJ; SARS Working Group.	N Engl J Med	2003	Record describes a novel non-attenuated coronavirus
26342906	10.1016/j.jviromet.2015.08.024	A novel diagnostic approach to detecting porcine epidemic diarrhea virus: The lateral immunochromatography assay	Kim YK, Lim SI, Cho IS, Cheong KM, Lee EJ, Lee SO, Kim JB, Kim JH, Jeong DS, An BH, An DJ.	J Virol Methods	2015	Record concerns coronaviruses but describes neither a novel nor an attenuated coronavirus
29104088	10.1016/j.mcp.2017.10.003	A novel duplex TaqMan probe-based real-time RT-qPCR for detecting and differentiating classical and variant porcine epidemic diarrhea viruses	Su, YF; Liu, YC; Chen, YM; Xing, GX; Hao, HF; Wei, Q; Liang, Y; Xie, WT; Li, DL; Huang, HM; Deng, RG; Zhang, GP	MOLECULAR AND CELLULAR PROBES	2018	Record concerns coronaviruses but describes neither a novel nor an attenuated coronavirus
33923271	10.3390/v13050747	A Novel Immunofluorescence Assay for the Rapid Serological Detection of SARS-CoV-2 Infection	Nguyen D, Skelly D, Goonawardane N.	Viruses	2021	Record concerns coronaviruses but describes neither a novel nor an attenuated coronavirus
10466791	10.1099/0022-1317-80-8-1959	A novel internal open reading frame product expressed from a polycistronic mRNA of porcine epidemic diarrhoea virus may not contribute to virus attenuation	Singh M.	Journal of General Virology	1999	Record describes coronavirus attenuation method that cannot be applied to SARS-CoV-2
32122588	10.1016/j.vetmic.2020.108579	A novel low virulent respiratory infectious bronchitis virus originating from the recombination of QX, TW and 4/91 genotype strains in China	Huang M, Zou C, Liu Y, Han Z, Xue C, Cao Y.	Vet Microbiol	2020	PASS	Record describes coronavirus attenuation method that cannot be applied to SARS-CoV-2
32669327	10.1128/JVI.01016-20	A novel mucosal adjuvant system for immunization against avian coronavirus causing infectious bronchitis	Chandrasekar S.S., Kingstad-Bakke B., Wu C.-W., Suresh M., Talaat A.M.	Journal of Virology	2020	Record concerns coronaviruses but describes neither a novel nor an attenuated coronavirus
18385240	10.1128/JVI.00203-08	A novel mutation in murine hepatitis virus nsp5, the viral 3C-like proteinase, causes temperature-sensitive defects in viral growth and protein processing	Sparks J.S., Donaldson E.F., Lu X., Baric R.S., Denison M.R.	Journal of Virology	2008	PASS	Record does not describe an in vivo study
28536429	10.1038/emi.2017.18	A novel neutralizing monoclonal antibody targeting the N-terminal domain of the MERS-CoV spike protein	Chen Y, Lu S, Jia H, Deng Y, Zhou J, Huang B, Yu Y, Lan J, Wang W, Lou Y, Qin K, Tan W.	Emerg Microbes Infect	2017	Record concerns coronaviruses but describes neither a novel nor an attenuated coronavirus
34858595	10.1093/emph/eoab032	A novel predictor of ACE2-binding ability among betacoronaviruses	Dixson JD, Azad RK.	Evol Med Public Health	2021	Record concerns coronaviruses but describes neither a novel nor an attenuated coronavirus
24634219	10.1074/jbc.M113.521708	A novel small-molecule tumor necrosis factor α inhibitor attenuates inflammation in a hepatitis mouse model	Ma L., Gong H., Zhu H., Ji Q., Su P., Liu P., Cao S., Yao J., Jiang L., Han M., Ma X., Xiong D., Luo H.R., Wang F., Zhou J., Xu Y.	Journal of Biological Chemistry	2014	Record does not concern coronaviruses
32422894	10.3390/vaccines8020220	A Novel Synonymous Mutation of SARS-CoV-2: Is This Possible to Affect Their Antigenicity and Immunogenicity?	Kim SJ, Nguyen VG, Park YH, Park BK, Chung HC.	Vaccines (Basel)	2020	Record concerns coronaviruses but describes neither a novel nor an attenuated coronavirus
7710354	10.1007/BF01309861	A novel variant of avian infectious bronchitis virus resulting from recombination among three different strains	Jia W., Karaca K., Parrish C.R., Naqi S.A.	Archives of Virology	1995	Record describes a novel non-attenuated coronavirus
27329854	10.1080/03079457.2016.1200011	A novel variant of the infectious bronchitis virus resulting from recombination events in Italy and Spain	Moreno A, Franzo G, Massi P, Tosi G, Blanco A, Antilles N, Biarnes M, Majó N, Nofrarías M, Dolz R, Lelli D, Sozzi E, Lavazza A, Cecchinato M.	Avian Pathol	2017	Record concerns coronaviruses but describes neither a novel nor an attenuated coronavirus
32737584	10.1007/s00705-020-04750-z	A palindromic RNA sequence as a common breakpoint contributor to copy-choice recombination in SARS-COV-2	Gallaher WR.	Arch Virol	2020	Record concerns coronaviruses but describes neither a novel nor an attenuated coronavirus
16681227		A pandemic flu: not if, but when. SARS was the wake-up call we slept through	Pascoe N.	Tex Nurs	2006	Record is a review on coronavirus attenuation
22542271	10.1016/j.vetmic.2012.03.039	A pantropic canine coronavirus genetically related to the prototype isolate CB/05	Decaro N, Mari V, von Reitzenstein M, Lucente MS, Cirone F, Elia G, Martella V, King VL, Di Bello A, Varello K, Zhang S, Caramelli M, Buonavoglia C.	Vet Microbiol	2012	Record describes a novel non-attenuated coronavirus
33125064	10.1093/GBE/EVAA229	A path toward SARS-CoV-2 attenuation: Metabolic pressure on CTP synthesis rules the virus evolution	Ou Z., Ouzounis C., Wang D., Sun W., Li J., Chen W., Marliere P., Danchin A.	Genome Biology and Evolution	2020	Record deals with coronavirus attenuation in only theoretical aspects
33163467	10.3389/fped.2020.582798	A Pediatric Strategy for the Next Phase of the SARS-CoV-2 Pandemic	Buonsenso D, Valentini P, Moscato U, Ricciardi W, Roland D.	Front Pediatr	2020	Record concerns coronaviruses but describes neither a novel nor an attenuated coronavirus
33064114	10.1039/d0lc00828a	A point-of-care selenium nanoparticle-based test for the combined detection of anti-SARS-CoV-2 IgM and IgG in human serum and blood	Wang Z, Zheng Z, Hu H, Zhou Q, Liu W, Li X, Liu Z, Wang Y, Ma Y.	Lab Chip	2020	Record concerns coronaviruses but describes neither a novel nor an attenuated coronavirus
33373882	10.1016/j.vetmic.2020.108955	A porcine epidemic diarrhea virus strain with distinct characteristics of four amino acid insertion in the COE region of spike protein	Ji Z, Shi D, Shi H, Wang X, Chen J, Liu J, Ye D, Jing Z, Liu Q, Fan Q, Li M, Cong G, Zhang J, Han Y, Zhang X, Feng L.	Vet Microbiol	2021	Record describes a novel non-attenuated coronavirus
33066343	10.3390/biom10101438	A possible path towards rapid development of live-attenuated SARS-CoV-2 vaccines: Plunging into the natural pool	Todorov G., Uversky V.N.	Biomolecules	2020	Record is a review on coronavirus attenuation
	10.1016/j.intimp.2021.108137	A possible pathogenic correlation between neutrophil elastase (NE) enzyme and inflammation in the pathogenesis of coronavirus disease 2019 (COVID-19)	Karampoor S., Hesamizadeh K., Maleki F., Farahmand M., Zahednasab H., Mirzaei R., Banoun H., Zamani F., Hajibaba M., Tabibzadeh A., Bouzari B., Bastani M.-N., Laali A., Keyvani H.	International Immunopharmacology	2021	Record concerns coronaviruses but describes neither a novel nor an attenuated coronavirus
34481543	10.1016/j.immuni.2021.08.016	A potently neutralizing SARS-CoV-2 antibody inhibits variants of concern by utilizing unique binding residues in a highly conserved epitope	VanBlargan LA, Adams LJ, Liu Z, Chen RE, Gilchuk P, Raju S, Smith BK, Zhao H, Case JB, Winkler ES, Whitener BM, Droit L, Aziati ID, Bricker TL, Joshi A, Shi PY, Creanga A, Pegu A, Handley SA, Wang D, Boon ACM, Crowe JE Jr, Whelan SPJ, Fremont DH, Diamond MS.	Immunity	2021	Record concerns coronaviruses but describes neither a novel nor an attenuated coronavirus
	10.1590/s0102-09352002000200013	A preliminary use of tracheal organ cultures for evaluating Brazilian infectious bronchitis virus strains [Resultados preliminares da utilização de cultivos de anéis de traquéia para o estudo de estirpes brasileiras do vírus da bronquite infecciosa das galinhas]	Epiphanio E.O.B., Martins N.R.S., Resende J.S., Pinto R.G., Jorge M.A., Souza M.B., Caccioppoli J., Cardozo R.M.	Arquivo Brasileiro de Medicina Veterinaria e Zootecnia	2002	Record does not describe an in vivo study
30824541	10.1074/jbc.RA118.004418	A proline insertion-deletion in the spike glycoprotein fusion peptide of mouse hepatitis virus strongly alters neuropathology	Singh M, Kishore A, Maity D, Sunanda P, Krishnarjuna B, Vappala S, Raghothama S, Kenyon LC, Pal D, Das Sarma J.	J Biol Chem	2019	PASS	Record describes coronavirus attenuation method that cannot be applied to SARS-CoV-2
34635140	10.1186/s13063-021-05643-5	A prospective, randomized, single-blinded, crossover trial to investigate the effect of a wearable device in addition to a daily symptom diary for the Remote Early Detection of SARS-CoV-2 infections (COVID-RED): a structured summary of a study protocol for a randomized controlled trial	Brakenhoff TB, Franks B, Goodale BM, van de Wijgert J, Montes S, Veen D, Fredslund EK, Rispens T, Risch L, Dowling AV, Folarin AA, Bruijning P, Dobson R, Heikamp T, Klaver P, Cronin M, Grobbee DE; COVID-RED Consortium.	Trials	2021	Record concerns coronaviruses but describes neither a novel nor an attenuated coronavirus
32962156	10.3390/biology9090296	A Putative Prophylactic Solution for COVID-19: Development of Novel Multiepitope Vaccine Candidate against SARS-COV-2 by Comprehensive Immunoinformatic and Molecular Modelling Approach	Rehman HM, Mirza MU, Ahmad MA, Saleem M, Froeyen M, Ahmad S, Gul R, Alghamdi HA, Aslam MS, Sajjad M, Bhinder MA.	Biology (Basel)	2020	Record concerns coronaviruses but describes neither a novel nor an attenuated coronavirus
33849629	10.1186/s13063-021-05180-1	A randomized, double-blind, placebo-controlled phase III clinical trial to evaluate the efficacy and safety of SARS-CoV-2 vaccine (inactivated, Vero cell): a structured summary of a study protocol for a randomised controlled trial	Akova M, Unal S.	Trials	2021	Record concerns coronaviruses but describes neither a novel nor an attenuated coronavirus
34969960	10.1038/s41598-021-04298-1	A rapid and affordable point of care test for antibodies against SARS-CoV-2 based on hemagglutination and artificial intelligence interpretation	Redecke V, Tawaratsumida K, Larragoite ET, Williams ESCP, Planelles V, Spivak AM, Hirayama L, Elgort M, Swenson S, Smith R, Worthen B, Zimmerman R, Slev P, Cahoon B, Astill M, Häcker H.	Sci Rep	2021	Record concerns coronaviruses but describes neither a novel nor an attenuated coronavirus
34312614	10.21203/rs.3.rs-712902/v1	A Rapid and Affordable Point-of-care Test for Detection of SARS-Cov-2-Specific Antibodies Based on Hemagglutination and Artificial Intelligence-Based Image Interpretation	Redecke V, Tawaratsumida K, Larragoite ET, Williams ESCP, Planelles V, Spivak AM, Hirayama L, Elgort M, Swenson S, Smith R, Worthen B, Zimmerman R, Slev P, Cahoon B, Astill M, Häcker H.	Res Sq	2021	Record concerns coronaviruses but describes neither a novel nor an attenuated coronavirus
34183368	10.4049/jimmunol.2100155	A Rapid Assay for SARS-CoV-2 Neutralizing Antibodies That Is Insensitive to Antiretroviral Drugs	Huang D, Tran JT, Peng L, Yang L, Suhandynata RT, Hoffman MA, Zhao F, Song G, He WT, Limbo O, Callaghan S, Landais E, Andrabi R, Sok D, Jardine JG, Burton DR, Voss JE, Fitzgerald RL, Nemazee D.	J Immunol	2021	Record concerns coronaviruses but describes neither a novel nor an attenuated coronavirus
		A rapid microneutralization test for antibody determination and serodiagnosis of human coronavirus OC43 infections	Gerna G., Cereda P.M., Revello M.G.	Microbiologica	1979	Record concerns coronaviruses but describes neither a novel nor an attenuated coronavirus
34183720	10.1038/s41598-021-92677-z	A rapid near-patient detection system for SARS-CoV-2 using saliva	Toppings NB, Mohon AN, Lee Y, Kumar H, Lee D, Kapoor R, Singh G, Oberding L, Abdullah O, Kim K, Berenger BM, Pillai DR.	Sci Rep	2021	Record concerns coronaviruses but describes neither a novel nor an attenuated coronavirus
34890401	10.1371/journal.pone.0259551	A rapid real-time polymerase chain reaction-based live virus microneutralization assay for detection of neutralizing antibodies against SARS-CoV-2 in blood/serum	Abidi SH, Imtiaz K, Kanji A, Qaiser S, Khan E, Iqbal K, Veldhoen M, Ghias K, Simas JP, Hasan Z.	PLoS One	2021	Record concerns coronaviruses but describes neither a novel nor an attenuated coronavirus
	10.1210/jendso/bvaa203	A Rare Case of SARS-CoV-2 Infection Associated with Pituitary Apoplexy without Comorbidities	Ghosh R., Roy D., Roy D., Mandal A., Dutta A., Naga D., Benito-León J.	Journal of the Endocrine Society	2021	Record concerns coronaviruses but describes neither a novel nor an attenuated coronavirus
32059047	10.1371/journal.pntd.0008065	A realistic two-strain model for MERS-CoV infection uncovers the high risk for epidemic propagation	Sardar T, Ghosh I, Rodó X, Chattopadhyay J.	PLoS Negl Trop Dis	2020	Record describes a novel non-attenuated coronavirus
33929934	10.1080/22221751.2021.1925163	A real-time and high-throughput neutralization test based on SARS-CoV-2 pseudovirus containing monomeric infrared fluorescent protein as reporter	Tsai WY, Ching LL, Hsieh SC, Melish ME, Nerurkar VR, Wang WK.	Emerg Microbes Infect	2021	Record concerns coronaviruses but describes neither a novel nor an attenuated coronavirus
26953939	10.1637/11262-081815-RegR.1	A real-time reverse-transcription polymerase chain reaction for differentiation of Massachusetts vaccine and brazilian field genotypes of avian infectious bronchitis virus	Padilha De Fraga A., Ikuta N., Salvador Kazantzi Fonseca A., Rosado Spilki F., Balestrin E., Dias Rodrigues C., Wageck Canal C., Ricardo Lunge V.	Avian Diseases	2016	Record concerns coronaviruses but describes neither a novel nor an attenuated coronavirus
12540797	10.1053/jhep.2003.50073	A recombinant adenovirus encoding hepatitis C virus core and E1 proteins protects mice against cytokine-induced liver damage	Lasarte J.J., Sarobe P., Boya P., Casares N., Arribillaga L., López-Díaz de Cerio A., Gorraiz M., Borrás-Cuesta F., Prieto J.	Hepatology	2003	Record does not concern coronaviruses
21912629	10.1371/journal.pone.0024352	A recombinant avian infectious bronchitis virus expressing a heterologous spike gene belonging to the 4/91 serotype	Armesto M, Evans S, Cavanagh D, Abu-Median AB, Keep S, Britton P.	PLoS One	2011	Record describes a novel non-attenuated coronavirus
12798610	10.1016/s0264-410x(03)00227-5	A recombinant fowl adenovirus expressing the S1 gene of infectious bronchitis virus protects against challenge with infectious bronchitis virus	Johnson MA, Pooley C, Ignjatovic J, Tyack SG.	Vaccine	2003	Record concerns coronaviruses but describes neither a novel nor an attenuated coronavirus
	10.3390/pathogens8040281	A recombinant influenza A/H1N1 carrying a short immunogenic peptide of MERS-CoV as bivalent vaccine in BALB/c mice	Shehata M.M., Kandeil A., Mostafa A., Mahmoud S.H., Gomaa M.R., El-Shesheny R., Webby R., Kayali G., Ali M.A.	Pathogens	2019	Record concerns coronaviruses but describes neither a novel nor an attenuated coronavirus
	10.3390/vaccines7040170	A recombinant la sota vaccine strain expressing multiple epitopes of infectious bronchitis virus (Ibv) protects specific pathogen-free (spf) chickens against ibv and ndv challenges	Tan L., Wen G., Qiu X., Yuan Y., Meng C., Sun Y., Liao Y., Song C., Liu W., Shi Y., Shao H., Ding C.	Vaccines	2019	Record concerns coronaviruses but describes neither a novel nor an attenuated coronavirus
32485251	10.1016/j.ijbiomac.2020.05.239	A recombinant Lactobacillus plantarum strain expressing the spike protein of SARS-CoV-2	Wang M, Fu T, Hao J, Li L, Tian M, Jin N, Ren L, Li C.	Int J Biol Macromol	2020	Record concerns coronaviruses but describes neither a novel nor an attenuated coronavirus
30097608	10.1038/s41598-018-30356-2	A Recombinant Newcastle Disease Virus (NDV) Expressing S Protein of Infectious Bronchitis Virus (IBV) Protects Chickens against IBV and NDV	Shirvani E., Paldurai A., Manoharan V.K., Varghese B.P., Samal S.K.	Scientific Reports	2018	Record concerns coronaviruses but describes neither a novel nor an attenuated coronavirus
35078661	10.1016/j.vaccine.2022.01.007	A recombinant SARS-CoV-2 receptor-binding domain expressed in an engineered fungal strain of Thermothelomyces heterothallica induces a functional immune response in mice	Lazo L, Bequet-Romero M, Lemos G, Musacchio A, Cabrales A, Bruno AJ, Ariel Espinosa L, Saloheimo M, Vitikainen M, Hernández A, Emalfarb M, Tchelet R, Suzarte E, Guillén G.	Vaccine	2022	Record concerns coronaviruses but describes neither a novel nor an attenuated coronavirus
14708973	10.1637/5919	A Recombination Event, Induced In Ovo, between a Low Passage Infectious Bronchitis Virus Field Isolate and a Highly Embryo Adapted Vaccine Strain	Estevez C., Villegas P., El-Attrache J.	Avian Diseases	2003	Record does not describe an in vivo study
28606144	10.1186/s12985-017-0775-8	A reverse genetics system for avian coronavirus infectious bronchitis virus based on targeted RNA recombination	Van Beurden S.J., Berends A.J., Krämer-Kühl A., Spekreijse D., Chénard G., Philipp H.-C., Mundt E., Rottier P.J.M., Verheije M.H.	Virology Journal	2017	Record describes a novel non-attenuated coronavirus
18568650	10.1080/03079450801986529	A reverse transcriptase-polymerase chain reaction survey of infectious bronchitis virus genotypes in Western Europe from 2002 to 2006	Worthington K.J., Currie R.J.W., Jones R.C.	Avian Pathology	2008	Record describes a novel non-attenuated coronavirus
34578456	10.3390/v13091875	A Reverse Transcription Recombinase-Aided Amplification Method for Rapid and Point-of-Care Detection of SARS-CoV-2, including Variants	Li F, He P, Xiong D, Lou Y, Pu Q, Zhang H, Zhang H, Yu J.	Viruses	2021	Record concerns coronaviruses but describes neither a novel nor an attenuated coronavirus
32758712	10.1016/j.virol.2020.07.006	A reverse-transcription recombinase-aided amplification assay for the rapid detection of N gene of severe acute respiratory syndrome coronavirus 2(SARS-CoV-2)	Wu T, Ge Y, Zhao K, Zhu X, Chen Y, Wu B, Zhu F, Zhu B, Cui L.	Virology	2020	Record concerns coronaviruses but describes neither a novel nor an attenuated coronavirus
9060676	10.1128/JVI.71.4.3129-3137.1997	A role for naturally occurring variation of the murine coronavirus spike protein in stabilizing association with the cellular receptor	Gallagher TM.	J Virol	1997	Record concerns coronaviruses but describes neither a novel nor an attenuated coronavirus
23978242	10.1186/1743-422X-10-266	A safe and convenient pseudovirus-based inhibition assay to detect neutralizing antibodies and screen for viral entry inhibitors against the novel human coronavirus MERS-CoV	Zhao G, Du L, Ma C, Li Y, Li L, Poon VK, Wang L, Yu F, Zheng BJ, Jiang S, Zhou Y.	Virol J	2013	Record concerns coronaviruses but describes neither a novel nor an attenuated coronavirus
33688034	10.1073/pnas.2026153118	A safe and highly efficacious measles virus-based vaccine expressing SARS-CoV-2 stabilized prefusion spike	Lu M., Dravid P., Zhang Y., Trivedi S., Li A., Harder O., Mahesh K.C., Chaiwatpongsakorn S., Zani A., Kenney A., Zeng C., Cai C., Ye C., Liang X., Shimamura M., Liu S.-L., Mejias A., Ramilo O., Boyaka P.N., Qiu J., Martinez-Sobrido L., Yount J.S., Peeples M.E., Kapoor A., Niewiesk S., Li J.	Proceedings of the National Academy of Sciences of the United States of America	2021	Record concerns coronaviruses but describes neither a novel nor an attenuated coronavirus
32553273	10.1016/j.cell.2020.06.011	A SARS-CoV-2 Infection Model in Mice Demonstrates Protection by Neutralizing Antibodies	Hassan AO, Case JB, Winkler ES, Thackray LB, Kafai NM, Bailey AL, McCune BT, Fox JM, Chen RE, Alsoussi WB, Turner JS, Schmitz AJ, Lei T, Shrihari S, Keeler SP, Fremont DH, Greco S, McCray PB Jr, Perlman S, Holtzman MJ, Ellebedy AH, Diamond MS.	Cell	2020	Record concerns coronaviruses but describes neither a novel nor an attenuated coronavirus
34534408	10.1002/anie.202110702	A SARS-CoV-2 Neutralization Assay Using Single Molecule Arrays	Gilboa T, Cohen L, Cheng CA, Lazarovits R, Uwamanzu-Nna A, Han I, Griswold K Jr, Barry N, Thompson DB, Kohman RE, Woolley AE, Karlson EW, Walt DR.	Angew Chem Int Ed Engl	2021	Record concerns coronaviruses but describes neither a novel nor an attenuated coronavirus
32704169	10.1038/s41587-020-0631-z	A SARS-CoV-2 surrogate virus neutralization test based on antibody-mediated blockage of ACE2-spike protein-protein interaction	Tan CW, Chia WN, Qin X, Liu P, Chen MI, Tiu C, Hu Z, Chen VC, Young BE, Sia WR, Tan YJ, Foo R, Yi Y, Lye DC, Anderson DE, Wang LF.	Nat Biotechnol	2020	Record concerns coronaviruses but describes neither a novel nor an attenuated coronavirus
32714112	10.2139/ssrn.3575161	A SARS-CoV-2 Vaccination Strategy Focused on Population-Scale Immunity	Yarmarkovich M, Warrington JM, Farrel A, Maris JM.	SSRN	2020	Record concerns coronaviruses but describes neither a novel nor an attenuated coronavirus
33118859	10.1080/22221751.2020.1837017	A SARS-CoV-2 variant with the 12-bp deletion at E gene	Sun Y.-S., Xu F., An Q., Chen C., Yang Z.-N., Lu H.-J., Chen J.-C., Yao P.-P., Jiang J.-M., Zhu H.-P.	Emerging Microbes and Infections	2020	Record describes a novel non-attenuated coronavirus
17037583	10.1007/978-0-387-33012-9_87	A SARS-CoV-specific protein enhances virulence of an attenuated strain of mouse hepatitis virus	Pewe L., Zhou H., Netland J., Tangadu C., Olivares H., Shi L., Look D., Gallagher T., Perlman S.	Advances in Experimental Medicine and Biology	2006	Record describes a novel non-attenuated coronavirus
26552008	10.1038/nm.3985	A SARS-like cluster of circulating bat coronaviruses shows potential for human emergence	Menachery VD, Yount BL Jr, Debbink K, Agnihothram S, Gralinski LE, Plante JA, Graham RL, Scobey T, Ge XY, Donaldson EF, Randell SH, Lanzavecchia A, Marasco WA, Shi ZL, Baric RS.	Nat Med	2015	Record describes a novel non-attenuated coronavirus
34496033	10.1111/all.15080	A scalable and highly immunogenic virus-like particle-based vaccine against SARS-CoV-2	Mohsen, MO; Balke, I; Zinkhan, S; Zeltina, V; Liu, XL; Chang, XY; Krenger, PS; Plattner, K; Gharailoo, Z; Vogt, ACS; Augusto, G; Zwicker, M; Roongta, S; Rothen, DA; Josi, R; da Costa, JJ; Sobczak, JM; Nonic, A; Brand, LA; Nuss, K; Martina, B; Speiser, DE; Kuendig, T; Jennings, GT; Walton, SM; Vogel, M; Zeltins, A; Bachmann, MF	ALLERGY		Record concerns coronaviruses but describes neither a novel nor an attenuated coronavirus
	10.3390/vaccines8030472	A scalable topical vectored vaccine candidate against SARS-CoV-2	Rohaim M.A., Munir M.	Vaccines	2020	Record concerns coronaviruses but describes neither a novel nor an attenuated coronavirus
30216376	10.1371/journal.pone.0203771	A self-adjuvanted nanoparticle based vaccine against infectious bronchitis virus	Li J., Helal Z.H., Karch C.P., Mishra N., Girshick T., Garmendia A., Burkhard P., Khan M.I.	PLoS ONE	2018	Record concerns coronaviruses but describes neither a novel nor an attenuated coronavirus
34990810	10.1016/j.ymthe.2022.01.001	A self-amplifying mRNA SARS-CoV-2 vaccine candidate induces safe and robust protective immunity in preclinical models	Maruggi G, Mallett CP, Westerbeck JW, Chen T, Lofano G, Friedrich K, Qu L, Sun JT, McAuliffe J, Kanitkar A, Arrildt KT, Wang KF, McBee I, McCoy D, Terry R, Rowles A, Abrahim MA, Ringenberg MA, Gains MJ, Spickler C, Xie X, Zou J, Shi PY, Dutt T, Henao-Tamayo M, Ragan I, Bowen RA, Johnson R, Nuti S, Luisi K, Ulmer JB, Steff AM, Jalah R, Bertholet S, Stokes AH, Yu D.	Mol Ther	2022	Record concerns coronaviruses but describes neither a novel nor an attenuated coronavirus
31365883	10.1016/j.mcp.2019.101426	A seminested RT-PCR for molecular genotyping of the Brazilian BR-I Infectious Bronchitis Virus Strain (GI-11)	Chacón RD, Astolfi-Ferreira CS, Chacón JL, Nuñez LFN, De la Torre DI, Piantino Ferreira AJ.	Mol Cell Probes	2019	Record concerns coronaviruses but describes neither a novel nor an attenuated coronavirus
17108030	10.1128/JVI.01467-06	A severe acute respiratory syndrome coronavirus that lacks the E gene is attenuated in vitro and in vivo	DeDiego M.L., Álvarez E., Almazán F., Rejas M.T., Lamirande E., Roberts A., Shieh W.-J., Zaki S.R., Subbarao K., Enjuanes L.	Journal of Virology	2007	PASS	PASS
16103185	10.1128/JVI.79.17.11335-11342.2005	A severe acute respiratory syndrome-associated coronavirus-specific protein enhances virulence of an attenuated murine coronavirus	Pewe L., Zhou H., Netland J., Tangudu C., Olivares H., Shi L., Look D., Gallagher T., Perlman S.	Journal of Virology	2005	Record describes a novel non-attenuated coronavirus
32870820	10.1172/jci.insight.142362	A simple protein-based surrogate neutralization assay for SARS-CoV-2	Abe KT, Li Z, Samson R, Samavarchi-Tehrani P, Valcourt EJ, Wood H, Budylowski P, Dupuis AP 2nd, Girardin RC, Rathod B, Wang JH, Barrios-Rodiles M, Colwill K, McGeer AJ, Mubareka S, Gommerman JL, Durocher Y, Ostrowski M, McDonough KA, Drebot MA, Drews SJ, Rini JM, Gingras AC.	JCI Insight	2020	Record concerns coronaviruses but describes neither a novel nor an attenuated coronavirus
34288729	10.1128/JCM.00845-21	A Simple Reverse Transcriptase PCR Melting-Temperature Assay To Rapidly Screen for Widely Circulating SARS-CoV-2 Variants	Banada P, Green R, Banik S, Chopoorian A, Streck D, Jones R, Chakravorty S, Alland D.	J Clin Microbiol	2021	Record concerns coronaviruses but describes neither a novel nor an attenuated coronavirus
	10.3390/diagnostics11030438	A simple, affordable, rapid, stabilized, colorimetric, versatile rt-lamp assay to detect sars-cov-2	García-Bernalt Diego J., Fernández-Soto P., Domínguez-Gil M., Belhassen-García M., Bellido J.L.M., Muro A.	Diagnostics	2021	Record concerns coronaviruses but describes neither a novel nor an attenuated coronavirus
32878932	10.1128/mSphere.00658-20	A Simplified Quantitative Real-Time PCR Assay for Monitoring SARS-CoV-2 Growth in Cell Culture	Shema Mugisha C, Vuong HR, Puray-Chavez M, Bailey AL, Fox JM, Chen RE, Wessel AW, Scott JM, Harastani HH, Boon ACM, Shin H, Kutluay SB.	mSphere	2020	Record concerns coronaviruses but describes neither a novel nor an attenuated coronavirus
33920999	10.3390/vaccines9040389	A Simplified SARS-CoV-2 Pseudovirus Neutralization Assay	Donofrio G, Franceschi V, Macchi F, Russo L, Rocci A, Marchica V, Costa F, Giuliani N, Ferrari C, Missale G.	Vaccines (Basel)	2021	Record concerns coronaviruses but describes neither a novel nor an attenuated coronavirus
15302214	10.1016/j.virol.2004.06.016	A single amino acid mutation in the spike protein of coronavirus infectious bronchitis virus hampers its maturation and incorporation into virions at the nonpermissive temperature	Shen S., Law Y.C., Liu D.X.	Virology	2004	PASS	Record describes coronavirus attenuation method that cannot be applied to SARS-CoV-2
32796842	10.1038/s41467-020-17972-1	A single dose of an adenovirus-vectored vaccine provides protection against SARS-CoV-2 challenge	Wu, SP; Zhong, GX; Zhang, J; Shuai, L; Zhang, Z; Wen, ZY; Wang, BS; Zhao, ZH; Song, XH; Chen, Y; Liu, RQ; Fu, L; Zhang, JL; Guo, Q; Wang, C; Yang, YL; Fang, T; Lv, P; Wang, JL; Xu, JJ; Li, JM; Yu, CM; Hou, LH; Bu, ZG; Chen, W	NATURE COMMUNICATIONS	2020	Record concerns coronaviruses but describes neither a novel nor an attenuated coronavirus
32577525	10.1126/sciadv.aba8399	A single dose of ChAdOx1 MERS provides protective immunity in rhesus macaques	van Doremalen N, Haddock E, Feldmann F, Meade-White K, Bushmaker T, Fischer RJ, Okumura A, Hanley PW, Saturday G, Edwards NJ, Clark MHA, Lambe T, Gilbert SC, Munster VJ.	Sci Adv	2020	Record concerns coronaviruses but describes neither a novel nor an attenuated coronavirus
34541571	10.1016/j.lana.2021.100079	A single dose of SARS-CoV-2 FINLAY-FR-1A vaccine enhances neutralization response in COVID-19 convalescents, with a very good safety profile: An open-label phase 1 clinical trial	Chang-Monteagudo A, Ochoa-Azze R, Climent-Ruiz Y, Macías-Abraham C, Rodríguez-Noda L, Valenzuela-Silva C, Sánchez-Ramírez B, Perez-Nicado R, Hernández-García T, Orosa-Vázquez I, Díaz-Hernández M, García-García MLÁ, Jerez-Barceló Y, Triana-Marrero Y, Ruiz-Villegas L, Rodríguez-Prieto LD, Puga-Gómez R, Guerra-Chaviano PP, Zúñiga-Rosales Y, Marcheco-Teruel B, Rodríguez-Acosta M, Noa-Romero E, Enríqu…	Lancet Reg Health Am	2021	Record concerns coronaviruses but describes neither a novel nor an attenuated coronavirus
33823303	10.1016/j.ymthe.2021.04.001	A single dose of self-transcribing and replicating RNA-based SARS-CoV-2 vaccine produces protective adaptive immunity in mice	de Alwis R, Gan ES, Chen S, Leong YS, Tan HC, Zhang SL, Yau C, Low JGH, Kalimuddin S, Matsuda D, Allen EC, Hartman P, Park KJ, Alayyoubi M, Bhaskaran H, Dukanovic A, Bao Y, Clemente B, Vega J, Roberts S, Gonzalez JA, Sablad M, Yelin R, Taylor W, Tachikawa K, Parker S, Karmali P, Davis J, Sullivan BM, Sullivan SM, Hughes SG, Chivukula P, Ooi EE.	Mol Ther	2021	Record concerns coronaviruses but describes neither a novel nor an attenuated coronavirus
34992610	10.3389/fimmu.2021.800723	A Single Dose SARS-CoV-2 Replicon RNA Vaccine Induces Cellular and Humoral Immune Responses in Simian Immunodeficiency Virus Infected and Uninfected Pigtail Macaques	O'Connor, MA; Erasmus, JH; Randall, S; Archer, J; Lewis, TB; Brown, B; Fredericks, M; Groenier, S; Iwayama, N; Ahrens, C; Garrison, W; Wangari, S; Guerriero, KA; Fuller, DH	FRONTIERS IN IMMUNOLOGY	2021	Record concerns coronaviruses but describes neither a novel nor an attenuated coronavirus
15831955	10.1099/vir.0.80844-0	A single immunization with a rhabdovirus-based vector expressing severe acute respiratory syndrome coronavirus (SARS-CoV) S protein results in the production of high levels of SARS-CoV-neutralizing antibodies	Faber M., Lamirande E.W., Roberts A., Rice A.B., Koprowski H., Dietzschold B., Schnell M.J.	Journal of General Virology	2005	Record concerns coronaviruses but describes neither a novel nor an attenuated coronavirus
34876520	10.1073/pnas.2109744118	A single intranasal dose of a live-attenuated parainfluenza virus-vectored SARS-CoV-2 vaccine is protective in hamsters	Liu X., Luongo C., Matsuoka Y., Park H.-S., Santos C., Yang L., Moore I.N., Afroz S., Johnson R.F., Lafont B.A.P., Martens C., Best S.M., Munster V.J., Holly J., Yewdell J.W., Nouen C.L., Munir S., Buchholz U.J.	Proceedings of the National Academy of Sciences of the United States of America	2021	Record concerns coronaviruses but describes neither a novel nor an attenuated coronavirus
30897856	10.3390/v11030282	A single V672F substitution in the spike protein of field-isolated PEDV Promotes Cell–Cell fusion and replication in Vero E6 cells	Wanitchang A., Saenboonrueng J., Kaewborisuth C., Srisutthisamphan K., Jongkaewwattana A.	Viruses	2019	Record describes a novel non-attenuated coronavirus
33260195	10.1038/s41586-020-3035-9	A single-dose live-attenuated YF17D-vectored SARS-CoV-2 vaccine candidate	Sanchez-Felipe L., Vercruysse T., Sharma S., Ma J., Lemmens V., Van Looveren D., Arkalagud Javarappa M.P., Boudewijns R., Malengier-Devlies B., Liesenborghs L., Kaptein S.J.F., De Keyzer C., Bervoets L., Debaveye S., Rasulova M., Seldeslachts L., Li L.-H., Jansen S., Yakass M.B., Verstrepen B.E., Böszörményi K.P., Kiemenyi-Kayere G., van Driel N., Quaye O., Zhang X., ter Horst S., Mishra N., Debo…	Nature	2021	Record concerns coronaviruses but describes neither a novel nor an attenuated coronavirus
35138028	10.15252/emmm.202115298	A siRNA targets and inhibits a broad range of SARS-CoV-2 infections including Delta variant	Chang YC, Yang CF, Chen YF, Yang CC, Chou YL, Chou HW, Chang TY, Chao TL, Hsu SC, Ieong SM, Tsai YM, Liu PC, Chin YF, Fang JT, Kao HC, Lu HY, Chang JY, Weng RS, Tu QW, Chang FY, Huang KY, Lee TY, Chang SY, Yang PC.	EMBO Mol Med	2022	Record concerns coronaviruses but describes neither a novel nor an attenuated coronavirus
34543863	10.1016/j.esmoop.2021.100272	A snapshot of the immunogenicity, efficacy and safety of a full course of BNT162b2 anti-SARS-CoV-2 vaccine in cancer patients treated with PD-1/PD-L1 inhibitors: a longitudinal cohort study	Lasagna A, Agustoni F, Percivalle E, Borgetto S, Paulet A, Comolli G, Sarasini A, Bergami F, Sammartino JC, Ferrari A, Zavaglio F, Arena F, Lilleri D, Secondino S, Falzoni M, Schiavo R, Klersy C, Lo Cascio G, Cavanna L, Baldanti F, Pedrazzoli P, Cassaniti I.	ESMO Open	2021	Record concerns coronaviruses but describes neither a novel nor an attenuated coronavirus
	10.1145/3152465.3152466	A spatial point pattern analysis of the 2003 SARS Epidemic in Beijing	Cao Z., Zhao P., Liu J., Zhong W.	Proceedings of the 3rd ACM SIGSPATIAL International Workshop on the Use of GIS in Emergency Management, EM-GIS 2017	2017	Record concerns coronaviruses but describes neither a novel nor an attenuated coronavirus
28622871	10.1016/j.vetmic.2017.05.013	A spike-specific whole-porcine antibody isolated from a porcine B cell that neutralizes both genogroup 1 and 2 PEDV strains	Fu F, Li L, Shan L, Yang B, Shi H, Zhang J, Wang H, Feng L, Liu P.	Vet Microbiol	2017	Record concerns coronaviruses but describes neither a novel nor an attenuated coronavirus
33012120	10.1111/tbed.13862	A strain of porcine deltacoronavirus: Genomic characterization, pathogenicity and its full-length cDNA infectious clone	Zhou X, Zhou L, Zhang P, Ge X, Guo X, Han J, Zhang Y, Yang H.	Transbound Emerg Dis	2021	Record describes a novel non-attenuated coronavirus
15629033	10.1016/s1672-0229(03)01026-x	A strategy for searching antigenic regions in the SARS-CoV spike protein	Ren Y, Zhou Z, Liu J, Lin L, Li S, Wang H, Xia J, Zhao Z, Wen J, Zhou C, Wang J, Yin J, Xu N, Liu S.	Genomics Proteomics Bioinformatics	2003	Record concerns coronaviruses but describes neither a novel nor an attenuated coronavirus
1659798	10.1007/BF01310476	A study on the mechanism of antibody-dependent enhancement of feline infectious peritonitis virus infection in feline macrophages by monoclonal antibodies	Hohdatsu T, Nakamura M, Ishizuka Y, Yamada H, Koyama H.	Arch Virol	1991	Record describes a novel non-attenuated coronavirus
34070152	10.3390/vaccines9050520	A Synthetic Peptide CTL Vaccine Targeting Nucleocapsid Confers Protection from SARS-CoV-2 Challenge in Rhesus Macaques	Harris PE, Brasel T, Massey C, Herst CV, Burkholz S, Lloyd P, Blankenberg T, Bey TM, Carback R, Hodge T, Ciotlos S, Wang L, Comer JE, Rubsamen RM.	Vaccines (Basel)	2021	Record concerns coronaviruses but describes neither a novel nor an attenuated coronavirus
33051445	10.1038/s41392-020-00352-y	A systematic review of SARS-CoV-2 vaccine candidates	Dong Y, Dai T, Wei Y, Zhang L, Zheng M, Zhou F.	Signal Transduct Target Ther	2020	Record is a review on coronavirus attenuation
31004698	10.1016/j.mcp.2019.04.003	A TaqMan probe-based real-time PCR to differentiate porcine epidemic diarrhea virus virulent strains from attenuated vaccine strains	Liu J., Li L.-M., Han J.-Q., Sun T.-R., Zhao X., Xu R.-T., Song Q.-Y.	Molecular and Cellular Probes	2019	Record concerns coronaviruses but describes neither a novel nor an attenuated coronavirus
	10.1111/ajt.16933	A third dose of SARS-CoV-2 vaccine increases neutralizing antibodies against variants of concern in solid organ transplant recipients	Karaba A.H., Zhu X., Liang T., Wang K.H., Rittenhouse A., Akinde O., Eby Y., Ruff J.E., Blankson J., Abedon A.T., Alejo J.L., Cox A.L., Bailey J., Thompson E.A., Klein S.L., Warren D.S., Garonzik-Wang J.M., Boyarsky B.J., Sitaras I., Pekosz A., Segev D.L., Tobian A.A.R., Werbel W.A.	American Journal of Transplantation	2021	Record concerns coronaviruses but describes neither a novel nor an attenuated coronavirus
	10.1038/s41541-021-00411-7	A third SARS-CoV-2 spike vaccination improves neutralization of variants-of-concern	Brinkkemper M., Brouwer P.J.M., Maisonnasse P., Grobben M., Caniels T.G., Poniman M., Burger J.A., Bontjer I., Oomen M., Bouhuijs J.H., van der Linden C.A., Villaudy J., van der Velden Y.U., Sliepen K., van Gils M.J., Le Grand R., Sanders R.W.	npj Vaccines	2021	Record concerns coronaviruses but describes neither a novel nor an attenuated coronavirus
8265618	10.1073/pnas.90.24.11733	A translation-attenuating intraleader open reading frame is selected on coronavirus mRNAs during persistent infection	Hofmann M.A., Senanayake S.D., Brian D.A.	Proceedings of the National Academy of Sciences of the United States of America	1993	PASS	Record describes coronavirus attenuation method that cannot be applied to SARS-CoV-2
24324708	10.1371/journal.pone.0081587	A Truncated Receptor-Binding Domain of MERS-CoV Spike Protein Potently Inhibits MERS-CoV Infection and Induces Strong Neutralizing Antibody Responses: Implication for Developing Therapeutics and Vaccines	Du, LY; Kou, ZH; Ma, CQ; Tao, XR; Wang, LL; Zhao, GY; Chen, YQ; Yu, F; Tseng, CTK; Zhou, YS; Jiang, SB	PLOS ONE	2013	Record concerns coronaviruses but describes neither a novel nor an attenuated coronavirus
21192982	10.1016/j.jviromet.2010.12.016	A type-specific blocking ELISA for the detection of infectious bronchitis virus antibody	Chen H.-W., Wang C.-H., Cheng I.-C.	Journal of Virological Methods	2011	Record concerns coronaviruses but describes neither a novel nor an attenuated coronavirus
34201088	10.3390/vaccines9060616	A Unique SARS-CoV-2 Spike Protein P681H Variant Detected in Israel	Zuckerman NS, Fleishon S, Bucris E, Bar-Ilan D, Linial M, Bar-Or I, Indenbaum V, Weil M, Lustig Y, Mendelson E, Mandelboim M, Mor O, Zuckerman N, On Behalf Of The Israel National Consortium For Sars-CoV-Sequencing.	Vaccines (Basel)	2021	Record describes a novel non-attenuated coronavirus
32726802	10.1038/s41586-020-2599-8	A vaccine targeting the RBD of the S protein of SARS-CoV-2 induces protective immunity	Yang J, Wang W, Chen Z, Lu S, Yang F, Bi Z, Bao L, Mo F, Li X, Huang Y, Hong W, Yang Y, Zhao Y, Ye F, Lin S, Deng W, Chen H, Lei H, Zhang Z, Luo M, Gao H, Zheng Y, Gong Y, Jiang X, Xu Y, Lv Q, Li D, Wang M, Li F, Wang S, Wang G, Yu P, Qu Y, Yang L, Deng H, Tong A, Li J, Wang Z, Yang J, Shen G, Zhao Z, Li Y, Luo J, Liu H, Yu W, Yang M, Xu J, Wang J, Li H, Wang H, Kuang D, Lin P, Hu Z, Guo W, Cheng…	Nature	2020	Record concerns coronaviruses but describes neither a novel nor an attenuated coronavirus
34464596	10.1016/j.immuni.2021.08.013	A vaccine-induced public antibody protects against SARS-CoV-2 and emerging variants	Schmitz AJ, Turner JS, Liu Z, Zhou JQ, Aziati ID, Chen RE, Joshi A, Bricker TL, Darling TL, Adelsberg DC, Altomare CG, Alsoussi WB, Case JB, VanBlargan LA, Lei T, Thapa M, Amanat F, Jeevan T, Fabrizio T, O'Halloran JA, Shi PY, Presti RM, Webby RJ, Krammer F, Whelan SPJ, Bajic G, Diamond MS, Boon ACM, Ellebedy AH.	Immunity	2021	Record concerns coronaviruses but describes neither a novel nor an attenuated coronavirus
33257477	10.1128/JVI.01715-20	A Versatile Reporter System To Monitor Virus-Infected Cells and Its Application to Dengue Virus and SARS-CoV-2	Pahmeier F, Neufeldt CJ, Cerikan B, Prasad V, Pape C, Laketa V, Ruggieri A, Bartenschlager R, Cortese M.	J Virol	2021	Record concerns coronaviruses but describes neither a novel nor an attenuated coronavirus
34914812	10.1371/journal.ppat.1010092	A vesicular stomatitis virus-based prime-boost vaccination strategy induces potent and protective neutralizing antibodies against SARS-CoV-2	Kim G.N., Choi J.-A., Wu K., Saeedian N., Yang E., Park H., Woo S.-J., Lim G., Kim S.-G., Eo S.-K., Jeong H.W., Kim T., Chang J.-H., Seo S.H., Kim N.H., Choi E., Choo S., Lee S., Winterborn A., Li Y., Parham K., Donovan J.M., Fenton B., Dikeakos J.D., Dekaban G.A., Mansour Haeryfar S.M., Troyer R.M., Arts E.J., Barr S.D., Song M., Yong Kang C.	PLoS Pathogens	2021	Record concerns coronaviruses but describes neither a novel nor an attenuated coronavirus
6316850	10.1016/0166-3542(83)90027-x	A viral subunit immunogen for porcine transmissible gastroenteritis	Gough PM, Ellis CH, Frank CJ, Johnson CJ.	Antiviral Res	1983	Record concerns coronaviruses but describes neither a novel nor an attenuated coronavirus
33909220	10.1007/s12250-021-00368-w	A Virulent PEDV Strain FJzz1 with Genomic Mutations and Deletions at the High Passage Level Was Attenuated in Piglets via Serial Passage In Vitro	Chen P., Zhao X., Zhou S., Zhou T., Tan X., Wu X., Tong W., Gao F., Yu L., Jiang Y., Yu H., Yang Z., Tong G., Zhou Y.	Virologica Sinica	2021	PASS	Record describes coronavirus attenuation method that cannot be applied to SARS-CoV-2
33136473	10.1089/mab.2020.0035	A Web-Based Platform on Coronavirus Disease-19 to Maintain Predicted Diagnostic, Drug, and Vaccine Candidates	Patiyal S, Kaur D, Kaur H, Sharma N, Dhall A, Sahai S, Agrawal P, Maryam L, Arora C, Raghava GPS.	Monoclon Antib Immunodiagn Immunother	2020	Record concerns coronaviruses but describes neither a novel nor an attenuated coronavirus
34842496	10.1080/22221751.2021.2011617	A year living with SARS-CoV-2: an epidemiological overview of viral lineage circulation by whole-genome sequencing in Barcelona city (Catalonia, Spain)	Andrés C, Piñana M, Borràs-Bermejo B, González-Sánchez A, García-Cehic D, Esperalba J, Rando A, Zules-Oña RG, Campos C, Codina MG, Blanco-Grau A, Colomer-Castell S, Martín MC, Castillo C, García-Comuñas K, Vásquez-Mercado R, Martins-Martins R, Saubi N, Campins-Martí M, Pumarola T, Quer J, Antón A.	Emerg Microbes Infect	2022	Record concerns coronaviruses but describes neither a novel nor an attenuated coronavirus
34960238	10.3390/vaccines9121492	A Yellow Fever 17D Virus Replicon-Based Vaccine Platform for Emerging Coronaviruses	Oreshkova N, Myeni SK, Mishra N, Albulescu IC, Dalebout TJ, Snijder EJ, Bredenbeek PJ, Dallmeier K, Kikkert M.	Vaccines (Basel)	2021	Record concerns coronaviruses but describes neither a novel nor an attenuated coronavirus
14522702	10.1080/0307945031000154062	Ability of Massachusetts-type infectious bronchitis virus to increase colibacillosis susceptibility in commercial broilers: A comparison between vaccine and virulent field virus	Matthijs M.G.R., Van Eck J.H.H., Landman W.J.M., Stegeman J.A.	Avian Pathology	2003	The sequence of coronavirus described by the record is not known
33922716	10.3390/v13050742	Accessible LAMP-Enabled Rapid Test (ALERT) for Detecting SARS-CoV-2	Bektaş A, Covington MF, Aidelberg G, Arce A, Matute T, Núñez I, Walsh J, Boutboul D, Delaugerre C, Lindner AB, Federici F, Jayaprakash AD.	Viruses	2021	Record concerns coronaviruses but describes neither a novel nor an attenuated coronavirus
35134681	10.1016/j.jcv.2022.105098	Accuracy and real life performance of a novel interferon-γ release assay for the detection of SARS-CoV2 specific T cell response	Huzly D, Panning M, Smely F, Enders M, Komp J, Falcone V, Steinmann D.	J Clin Virol	2022	Record concerns coronaviruses but describes neither a novel nor an attenuated coronavirus
32997812	10.1111/all.14608	Accuracy of serological testing for SARS-CoV-2 antibodies: First results of a large mixed-method evaluation study	Brigger D, Horn MP, Pennington LF, Powell AE, Siegrist D, Weber B, Engler O, Piezzi V, Damonti L, Iseli P, Hauser C, Froehlich TK, Villiger PM, Bachmann MF, Leib SL, Bittel P, Fiedler M, Largiadèr CR, Marschall J, Stalder H, Kim PS, Jardetzky TS, Eggel A, Nagler M.	Allergy	2021	Record concerns coronaviruses but describes neither a novel nor an attenuated coronavirus
32520981	10.1590/1678-4685-gmb-2020-0104	ACE2 diversity in placental mammals reveals the evolutionary strategy of SARS-CoV-2	Bibiana S O F, Vargas-Pinilla P, Amorim CEG, Sortica VA, Bortolini MC.	Genet Mol Biol	2020	Record concerns coronaviruses but describes neither a novel nor an attenuated coronavirus
35023830	10.7554/eLife.74623	ACE2 is the critical in vivo receptor for SARS-CoV-2 in a novel COVID-19 mouse model with TNF- and IFNγ-driven immunopathology	Gawish R, Starkl P, Pimenov L, Hladik A, Lakovits K, Oberndorfer F, Cronin SJ, Ohradanova-Repic A, Wirnsberger G, Agerer B, Endler L, Capraz T, Perthold JW, Cikes D, Koglgruber R, Hagelkruys A, Montserrat N, Mirazimi A, Boon L, Stockinger H, Bergthaler A, Oostenbrink C, Penninger JM, Knapp S.	Elife	2022	Record concerns coronaviruses but describes neither a novel nor an attenuated coronavirus
20164235	10.1128/JVI.02480-09	Achieving a golden mean: Mechanisms by which coronaviruses ensure synthesis of the correct stoichiometric ratios of viral proteins	Plant E.P., Rakauskaite R., Taylor D.R., Dinman J.D.	Journal of Virology	2010	PASS	Record does not describe an in vivo study
9007076	10.1006/viro.1996.8313	Acquired fusion activity of a murine coronavirus MHV-2 variant with mutations in the proteolytic cleavage site and the signal sequence of the S protein	Yamada YK, Takimoto K, Yabe M, Taguchi F.	Virology	1997	PASS	Record describes a novel non-attenuated coronavirus
19572016	10.1371/journal.pone.0006130	Acquisition of cell-cell fusion activity by amino acid substitutions in spike protein determines the infectivity of a coronavirus in cultured cells	Yamada Y., Liu X.B., Fang S.G., Tay F.P.L., Liu D.X.	PLoS ONE	2009	Record describes a novel non-attenuated coronavirus
31562757	10.1093/infdis/jiz483	Activation of C-Type Lectin Receptor and (RIG)-I-Like Receptors Contributes to Proinflammatory Response in Middle East Respiratory Syndrome Coronavirus-Infected Macrophages	Zhao X., Chu H., Wong B.H.-Y., Chiu M.C., Wang D., Li C., Liu X., Yang D., Poon V.K.-M., Cai J., Chan J.F.-W., To K.K.-W., Zhou J., Yuen K.-Y.	Journal of Infectious Diseases	2020	Record concerns coronaviruses but describes neither a novel nor an attenuated coronavirus
	10.1002/hep4.1584	Activation of Liver X Receptor α Sensitizes Mice to T-Cell Mediated Hepatitis	Gao L., Li B., Wang J., Shen D., Yang M., Sun R., Tung H.-C., Xu M., Ren S., Zhang M., Yang D., Lu B., Wang H., Liu Y., Xie W.	Hepatology Communications	2020	Record does not concern coronaviruses
9055968		Active and passive immune responses to transmissible gastroenteritis virus (TGEV) in swine inoculated with recombinant baculovirus-expressed TGEV spike glycoprotein vaccines	Shoup D.I., Jackwood D.J., Saif L.J.	American Journal of Veterinary Research	1997	Record concerns coronaviruses but describes neither a novel nor an attenuated coronavirus
	10.1080/03079458108418466	Active and passive immunisation against nephritis induced by an avian infectious bronchitis virus	Macdonald J.W., Randall C.J., McMartin D.A., Gazdzinski P., Dagless M.D.	Avian Pathology	1981	The sequence of coronavirus described by the record is not known
10507362	10.1016/S0165-2427(99)00074-4	Active immunity and T-cell populations in pigs intraperitoneally inoculated with baculovirus-expressed transmissible gastroenteritis virus structural proteins	Sestak K., Meister R.K., Hayes J.R., Kim L., Lewis P.A., Myers G., Saif L.J.	Veterinary Immunology and Immunopathology	1999	Record concerns coronaviruses but describes neither a novel nor an attenuated coronavirus
1316530	10.1016/0882-4010(92)90112-2	Acute and late disease induced by murine coronavirus, strain JHM, in a series of recombinant inbred strains between BALB/cHeA and STS/A mice	Kyuwa S., Yamaguchi K., Toyoda Y., Fujiwara K., Hilgers J.	Microbial Pathogenesis	1992	Record concerns coronaviruses but describes neither a novel nor an attenuated coronavirus
6100984		Acute and subacute demyelination induced by mouse hepatitis virus strain A59 in C3H mice	Woyciechowska JL, Trapp BD, Patrick DH, Shekarchi IC, Leinikki PO, Sever JL, Holmes KV.	J Exp Pathol	1984	Report not retrieved
34314031	10.1002/jmv.27232	Acute cerebellitis following SARS-CoV-2 infection: A case report and review of the literature	Moreno-Escobar M.C., Feizi P., Podury S., Tandon M., Munir B., Alvi M., Adcock A., Sriwastava S.	Journal of Medical Virology	2021	Record concerns coronaviruses but describes neither a novel nor an attenuated coronavirus
6279940		Acute demyelination in mice inoculated intraspinally with mouse hepatitis virus, JHM strain	Takahashi K., Goto N., Ishida T., Katami K., Fujiwara K.	Japanese Journal of Experimental Medicine	1981	Record concerns coronaviruses but describes neither a novel nor an attenuated coronavirus
34325334	10.1016/j.clineuro.2021.106839	Acute disseminated encephalomyelitis after SARS-CoV-2 vaccination	Vogrig A., Janes F., Gigli G.L., Curcio F., Negro I.D., D'Agostini S., Fabris M., Valente M.	Clinical Neurology and Neurosurgery	2021	Record concerns coronaviruses but describes neither a novel nor an attenuated coronavirus
34018145	10.1007/s13760-021-01699-x	Acute disseminated encephalomyelitis-like presentation after an inactivated coronavirus vaccine	Ozgen Kenangil G., Ari B.C., Guler C., Demir M.K.	Acta Neurologica Belgica	2021	Record concerns coronaviruses but describes neither a novel nor an attenuated coronavirus
8380608	10.1093/infdis/167.2.264	Acute murine cytomegalovirus infection induces lethal hepatitis	Shanley JD, Biczak L, Forman SJ.	J Infect Dis	1993	Record does not concern coronaviruses
	10.1097/IPC.0000000000001029	Acute Necrotizing Rhombencephalitis and Disemminated Thrombosis after SARS-CoV-2 Infection	Samal P., Praharaj H.N., Mishra B., Sarangi S.	Infectious Diseases in Clinical Practice	2021	Record concerns coronaviruses but describes neither a novel nor an attenuated coronavirus
34473254	10.1093/ecco-jcc/jjab153	Adalimumab and infliximab impair SARS-CoV-2 antibody responses: results from a therapeutic drug monitoring study in 11422 biologic-treated patients	Chanchlani N., Lin S., Chee D., Hamilton B., Nice R., Zehra A., Bewshea C., Cipriano B., Derikx L.A.A.P., Dunlop A., Greathead L., Griffiths R.L., Ibraheim H., Kelleher P., Kok K.B., Lees C.W., MacDonald J., Sebastian S., Smith P.J., McDonald T.J., Irving P.M., Powell N., Kennedy N.A., Goodhand J.R., Ahmad T.	Journal of Crohn's & colitis (2021). Date of Publication: 2 Sep 2021	2021	Record concerns coronaviruses but describes neither a novel nor an attenuated coronavirus
4926595		Adaptation and propagation of avian infectious bronchitis virus in embryonic turkey kidney cell cultures	Coria MF, Peterson JK.	Avian Dis	1971	The sequence of coronavirus described by the record is not known
9782348	10.1007/978-1-4615-5331-1_91	Adaptation and serial passage of bovine coronavirus in an established diploid swine testicular cell line and subsequent development of a modified live vaccine	Welter M.W.	Advances in Experimental Medicine and Biology	1998	PASS	The sequence of coronavirus described by the record is not known
6284011		Adaptation of an isolate of bovine enteritic coronavirus to serial growth in cell culture and characterization of the virus (author's transl)	L'Haridon R., Scherrer R., Vautherot J.F., La Bonnardière C., Laporte J., Cohen J.	Annales de recherches vétérinaires. Annals of veterinary research	1981	Report not retrieved
6327888	10.1099/0022-1317-65-5-915	Adaptation of coronavirus JHM to persistent infection of murine sac(-) cells	Baybutt HN, Wege H, Carter MJ, ter Meulen V.	J Gen Virol	1984	The sequence of coronavirus described by the record is not known
20617177	10.1371/journal.ppat.1000978	Adaptation of hepatitis C virus to mouse CD81 permits infection of mouse cells in the absence of human entry factors	Bitzegeio J, Bankwitz D, Hueging K, Haid S, Brohm C, Zeisel MB, Herrmann E, Iken M, Ott M, Baumert TF, Pietschmann T.	PLoS Pathog	2010	Record does not concern coronaviruses
10073413	10.1016/s0928-0197(98)00067-1	Adaptation of human enteric coronavirus to growth in cell lines	Luby JP, Clinton R, Kurtz S.	J Clin Virol	1999	Record describes a novel non-attenuated coronavirus
32732280	10.1126/science.abc4730	Adaptation of SARS-CoV-2 in BALB/c mice for testing vaccine efficacy	Gu H, Chen Q, Yang G, He L, Fan H, Deng YQ, Wang Y, Teng Y, Zhao Z, Cui Y, Li Y, Li XF, Li J, Zhang NN, Yang X, Chen S, Guo Y, Zhao G, Wang X, Luo DY, Wang H, Yang X, Li Y, Han G, He Y, Zhou X, Geng S, Sheng X, Jiang S, Sun S, Qin CF, Zhou Y.	Science	2020	Record describes a novel non-attenuated coronavirus
34527284	10.1093/ve/veab061	Adaptation of the endemic coronaviruses HCoV-OC43 and HCoV-229E to the human host	Forni D, Cagliani R, Arrigoni F, Benvenuti M, Mozzi A, Pozzoli U, Clerici M, De Gioia L, Sironi M.	Virus Evol	2021	Record concerns coronaviruses but describes neither a novel nor an attenuated coronavirus
	10.36233/0372-9311-136	Adaptation of the mtt assay for detection of neutralizing antibodies against the sars-cov-2 virus	Gracheva A.V., Korchevaya E.R., Kudryashova A.M., Borisova O.V., Petrusha O.A., Smirnova D.I., Chernyshova I.N., Svitich O.A., Zverev V.V., Faizuloev E.B.	Zhurnal Mikrobiologii Epidemiologii i Immunobiologii	2021	Record concerns coronaviruses but describes neither a novel nor an attenuated coronavirus
1309640	10.1007/BF01321128	Adaptation of transmissible gastroenteritis virus to growth in non-permissive Vero cells	Ishii H., Watanabe I., Mukamoto M., Kobayashi Y., Kodama Y.	Archives of Virology	1992	Record describes a novel non-attenuated coronavirus
		ADAPTATION TO DUCK EMBRYO OF INFECTIOUS BRONCHITIS VIRUS, NEWCASTLE-DISEASE VIRUS AND FOWLPOX VIRUS FOR DEVELOPING LIVE VACCINES	MALIK, Z	ACTA MICROBIOLOGICA ACADEMIAE SCIENTIARUM HUNGARICAE	1975	Record concerns coronaviruses but describes neither a novel nor an attenuated coronavirus
24107353	10.1186/1743-422X-10-304	Adaptive evolution of bat dipeptidyl peptidase 4 (dpp4): implications for the origin and emergence of Middle East respiratory syndrome coronavirus	Cui J, Eden JS, Holmes EC, Wang LF.	Virol J	2013	Record concerns coronaviruses but describes neither a novel nor an attenuated coronavirus
30110630	10.1016/j.celrep.2018.07.045	Adaptive Evolution of MERS-CoV to Species Variation in DPP4	Letko M., Miazgowicz K., McMinn R., Seifert S.N., Sola I., Enjuanes L., Carmody A., van Doremalen N., Munster V.	Cell Reports	2018	Record concerns coronaviruses but describes neither a novel nor an attenuated coronavirus
35104245	10.1172/jci.insight.155944	Adaptive immune responses in vaccinated patients with symptomatic SARS-CoV-2 Alpha infection	Park HS, Shapiro JR, Sitaras I, Woldemeskel BA, Garliss C, Dziedzic A, Sachithanandham J, Jedlicka AE, Caputo CA, Rousseau KE, Thakar M, Suwanmanee S, Hauk P, Aliyu L, Majewska NI, Koley S, Patel B, Broderick P, Mosnaim G, Heath SL, Spivak ES, Shenoy A, Bloch EM, Gniadek TJ, Shoham S, Casadevall A, Hanley D, Cox AL, Laeyendecker O, Betenbaugh M, Cramer SM, Mostafa HH, Pekosz A, Blankson JN, Klein…	JCI Insight	2022	Record concerns coronaviruses but describes neither a novel nor an attenuated coronavirus
34391981	10.1016/j.jcv.2021.104943	Adaptive immune responses to SARS-CoV-2 in recovered severe COVID-19 patients	Olea B, Albert E, Torres I, Amat P, Remigia MJ, Gozalbo-Rovira R, Rodríguez-Díaz J, Buesa J, Blasco ML, Redón J, Signes-Costa J, Navarro D.	J Clin Virol	2021	Record concerns coronaviruses but describes neither a novel nor an attenuated coronavirus
32796814	10.1038/s41392-020-00263-y	Adaptive immune responses to SARS-CoV-2 infection in severe versus mild individuals	Zhang F., Gan R., Zhen Z., Hu X., Li X., Zhou F., Liu Y., Chen C., Xie S., Zhang B., Wu X., Huang Z.	Signal Transduction and Targeted Therapy	2020	Record concerns coronaviruses but describes neither a novel nor an attenuated coronavirus
34950880	10.1038/s43018-021-00274-w	Adaptive immunity and neutralizing antibodies against SARS-CoV-2 variants of concern following vaccination in patients with cancer: The CAPTURE study	Fendler A, Shepherd STC, Au L, Wilkinson KA, Wu M, Byrne F, Cerrone M, Schmitt AM, Joharatnam-Hogan N, Shum B, Tippu Z, Rzeniewicz K, Boos LA, Harvey R, Carlyle E, Edmonds K, Del Rosario L, Sarker S, Lingard K, Mangwende M, Holt L, Ahmod H, Korteweg J, Foley T, Bazin J, Gordon W, Barber T, Emslie-Henry A, Xie W, Gerard CL, Deng D, Wall EC, Agua-Doce A, Namjou S, Caidan S, Gavrielides M, MacRae JI…	Nat Cancer	2021	Record concerns coronaviruses but describes neither a novel nor an attenuated coronavirus
33747512	10.1002/cti2.1264	Adaptive immunity to human coronaviruses is widespread but low in magnitude	Tan HX, Lee WS, Wragg KM, Nelson C, Esterbauer R, Kelly HG, Amarasena T, Jones R, Starkey G, Wang BZ, Yoshino O, Tiang T, Grayson ML, Opdam H, D'Costa R, Vago A; Austin Liver Transplant Perfusionist Group, Mackay LK, Gordon CL, Wheatley AK, Kent SJ, Juno JA.	Clin Transl Immunology	2021	Record concerns coronaviruses but describes neither a novel nor an attenuated coronavirus
34796418	10.1007/s10072-021-05761-7	ADEM anti-MOG antibody-positive after SARS-CoV2 vaccination	Mumoli L., Vescio V., Pirritano D., Russo E., Bosco D.	Neurological Sciences	2022	Record concerns coronaviruses but describes neither a novel nor an attenuated coronavirus
31651516	10.1097/CM9.0000000000000488	Adiponectin receptor agonist AdipoRon relieves endotoxin-induced acute hepatitis in mice	Xiao W.-Z., Zhang L.	Chinese Medical Journal	2019	Record does not concern coronaviruses
32586380	10.1186/s12967-020-02430-9	Advanced bioinformatics rapidly identifies existing therapeutics for patients with coronavirus disease-2019 (COVID-19)	Kim J., Zhang J., Cha Y., Kolitz S., Funt J., Chong R.E., Barrett S., Kusko R., Zeskind B., Kaufman H.	Journal of Translational Medicine	2020	Record concerns coronaviruses but describes neither a novel nor an attenuated coronavirus
		Advantageous non-specific effects of live-attenuated vaccines in COVID-19 treatment	Yaqinuddin A., Ambia A.R., Kazkaz H., AlSaud M.B.M., Alkattan K., Kashir J.	African Journal of Respiratory Medicine (2021) 16:1. Date of Publication: 1 Mar 2021	2021	Record concerns coronaviruses but describes neither a novel nor an attenuated coronavirus
15763728	10.1080/03079450400013170	Aerosol-induced Mycoplasma synoviae arthritis: The synergistic effect of infectious bronchitis virus infection	Landman W.J.M., Feberwee A.	Avian Pathology	2004	Record concerns coronaviruses but describes neither a novel nor an attenuated coronavirus
		Aflatoxin effect on humoral and mucosal immune responses against infectious bronchitis vaccine in broilers	Shahabi-Ghahfarokhi B., Gholami-Ahangaran M., Jafarian-Dehkordi M.	Thai Journal of Veterinary Medicine	2016	The sequence of coronavirus described by the record is not known
34229623	10.1186/s12877-021-02340-5	Age differences in the association of comorbid burden with adverse outcomes in SARS-CoV-2	O’Hare A.M., Berry K., Fan V.S., Crothers K., Eastment M.C., Dominitz J.A., Shah J.A., Green P., Locke E., Ioannou G.N.	BMC Geriatrics	2021	Record concerns coronaviruses but describes neither a novel nor an attenuated coronavirus
25910920	10.1016/j.vaccine.2015.04.026	Age-dependent immune responses and immune protection after avian coronavirus vaccination	van Ginkel F.W., Padgett J., Martinez-Romero G., Miller M.S., Joiner K.S., Gulley S.L.	Vaccine	2015	PASS	The sequence of coronavirus described by the record is not known
34287620	10.1001/jama.2021.11656	Age-Dependent Neutralization of SARS-CoV-2 and P.1 Variant by Vaccine Immune Serum Samples	Bates TA, Leier HC, Lyski ZL, Goodman JR, Curlin ME, Messer WB, Tafesse FG.	JAMA	2021	Record concerns coronaviruses but describes neither a novel nor an attenuated coronavirus
27318478	10.1007/s10719-016-9703-1	Age-dependent PPARα activation induces hepatic sulfatide accumulation in transgenic mice carrying the hepatitis C virus core gene	Tian Y., Yang Y., Zhang X., Nakajima T., Tanaka N., Sugiyama E., Kamijo Y., Lu Y., Moriya K., Koike K., Gonzalez F.J., Aoyama T.	Glycoconjugate Journal	2016	Record does not concern coronaviruses
194073		Age-dependent response of mice to a mouse hepatitis virus, MHV-S	Taguchi F, Aiuchi M, Fujiwara K.	Jpn J Exp Med	1977	Record concerns coronaviruses but describes neither a novel nor an attenuated coronavirus
26433606	10.1016/j.vetimm.2015.09.006	Age-dependent variation in innate immune responses to porcine epidemic diarrhea virus infection in suckling versus weaned pigs	Annamalai, T; Saif, LJ; Lu, ZY; Jung, K	VETERINARY IMMUNOLOGY AND IMMUNOPATHOLOGY	2015	Record concerns coronaviruses but describes neither a novel nor an attenuated coronavirus
26303994	10.1159/000430346	Aggravated liver injury but attenuated inflammation in PTPRO-deficient mice following LPS/D-GaIN induced fulminant hepatitis	Wang X., Yan S., Xu D., Li J., Xie Y., Hou J., Jiang R., Zhang C., Sun B.	Cellular Physiology and Biochemistry	2015	Record does not concern coronaviruses
33841493	10.3389/fgene.2021.602196	AI Aided Design of Epitope-Based Vaccine for the Induction of Cellular Immune Responses Against SARS-CoV-2	Mazzocco G, Niemiec I, Myronov A, Skoczylas P, Kaczmarczyk J, Sanecka-Duin A, Gruba K, Król P, Drwal M, Szczepanik M, Pyrc K, Stȩpniak P.	Front Genet	2021	Record concerns coronaviruses but describes neither a novel nor an attenuated coronavirus
34193433	10.1136/bmjresp-2021-000915	Air quality, Environment and Respiratory Outcomes in Bronchopulmonary Dysplasia, the AERO-BPD cohort study: design and adaptation during the SARS-CoV-2 pandemic	Ruran HB, Adamkiewicz G, Cunningham A, Petty CR, Greco KF, Gunnlaugsson S, Stamatiadis N, Sierra G, Vallarino J, Alvarez M, Hayden LP, Sheils CA, Weller E, Phipatanakul W, Gaffin JM.	BMJ Open Respir Res	2021	Record concerns coronaviruses but describes neither a novel nor an attenuated coronavirus
33158901	10.1128/AEM.02019-20	Airborne Disinfection by Dry Fogging Efficiently Inactivates Severe Acute Respiratory Syndrome Coronavirus 2 (SARS-CoV-2), Mycobacteria, and Bacterial Spores and Shows Limitations of Commercial Spore Carriers	Schinköthe J, Scheinemann HA, Diederich S, Freese H, Eschbaumer M, Teifke JP, Reiche S.	Appl Environ Microbiol	2021	Record concerns coronaviruses but describes neither a novel nor an attenuated coronavirus
	10.1016/j.envpol.2021.118299	Airborne microplastics and SARS-CoV-2 in total suspended particles in the area surrounding the largest medical centre in Latin America	Amato-Lourenço L.F., de Souza Xavier Costa N., Dantas K.C., dos Santos Galvão L., Moralles F.N., Lombardi S.C.F.S., Júnior A.M., Lindoso J.A.L., Ando R.A., Lima F.G., Carvalho-Oliveira R., Mauad T.	Environmental Pollution	2022	Record concerns coronaviruses but describes neither a novel nor an attenuated coronavirus
34517212	10.1016/j.bbrc.2021.09.015	Air-liquid interphase culture confers SARS-CoV-2 susceptibility to A549 alveolar epithelial cells	Sasaki M., Kishimoto M., Itakura Y., Tabata K., Intaruck K., Uemura K., Toba S., Sanaki T., Sato A., Hall W.W., Orba Y., Sawa H.	Biochemical and Biophysical Research Communications	2021	Record concerns coronaviruses but describes neither a novel nor an attenuated coronavirus
	10.1111/resp.13009	Airway epithelial innate immune responses to coronaviruses	Loo S.-L., Hsu A., Bartlett N., Wark P.	Respirology (2017) 22 Supplement 2 (94). Date of Publication: 1 Mar 2017	2017	Record describes a novel non-attenuated coronavirus
24576052	10.1021/mp400690v	Albumin fusion prolongs the antioxidant and anti-inflammatory activities of thioredoxin in mice with acetaminophen-induced hepatitis	Tanaka R., Ishima Y., Maeda H., Kodama A., Nagao S., Watanabe H., Chuang V.T.G., Otagiri M., Maruyama T.	Molecular Pharmaceutics	2014	Record does not concern coronaviruses
30121625	10.1136/gutjnl-2018-316221	Alcohol inhibits T-cell glucose metabolism and hepatitis in ALDH2-deficient mice and humans: Roles of acetaldehyde and glucocorticoids	Gao Y., Zhou Z., Ren T., Kim S.-J., He Y., Seo W., Guillot A., Ding Y., Wu R., Shao S., Wang X., Zhang H., Wang W., Feng D., Xu M., Han E., Zhong W., Zhou Z., Pacher P., Niu J., Gao B.	Gut	2019	Record does not concern coronaviruses
34161095	10.1021/acs.jpclett.1c01415	Allosteric Cross-Talk among Spike's Receptor-Binding Domain Mutations of the SARS-CoV-2 South African Variant Triggers an Effective Hijacking of Human Cell Receptor	Spinello A, Saltalamacchia A, Borišek J, Magistrato A.	J Phys Chem Lett	2021	Record concerns coronaviruses but describes neither a novel nor an attenuated coronavirus
25005608	10.1186/1472-6882-14-229	Aloe vera attenuated liver injury in mice with acetaminophen-induced hepatitis	Werawatganon D., Linlawan S., Thanapirom K., Somanawat K., Klaikeaw N., Rerknimitr R., Siriviriyakul P.	BMC Complementary and Alternative Medicine	2014	Record does not concern coronaviruses
32760397	10.3389/fimmu.2020.01447	Alox12/15 Deficiency Exacerbates, While Lipoxin A4 Ameliorates Hepatic Inflammation in Murine Alcoholic Hepatitis	Queck A., Fink A.F., Sirait-Fischer E., Rüschenbaum S., Thomas D., Snodgrass R.G., Geisslinger G., Baba H.A., Trebicka J., Zeuzem S., Weigert A., Lange C.M., Brüne B.	Frontiers in Immunology	2020	Record does not concern coronaviruses
27018751	10.1016/j.intimp.2016.03.023	Alpha-lipoic acid protects mice against concanavalin A-induced hepatitis by modulating cytokine secretion and reducing reactive oxygen species generation	Fei M., Xie Q., Zou Y., He R., Zhang Y., Wang J., Bo L., Li J., Deng X.	International Immunopharmacology	2016	Record does not concern coronaviruses
32867979	10.1016/j.psj.2020.05.054	Alteration of immunological parameters in infectious bronchitis vaccinated–specific pathogen-free broilers after the use of different infectious bursal disease vaccines	Lupini C., Quaglia G., Mescolini G., Russo E., Salaroli R., Forni M., Boldini S., Catelli E.	Poultry Science	2020	PASS	The sequence of coronavirus described by the record is not known
32880235	10.1177/0300985820932140	Alterations in Intestinal Innate Mucosal Immunity of Weaned Pigs During Porcine Epidemic Diarrhea Virus Infection	Chen Y.-M., Helm E.T., Gabler N., Hostetter J.M., Burrough E.R.	Veterinary Pathology	2020	Record concerns coronaviruses but describes neither a novel nor an attenuated coronavirus
34311498	10.1113/EP089820	Altered central and peripheral haemodynamics during rhythmic handgrip exercise in young adults with SARS-CoV-2	Stute N.L., Stickford A.S.L., Stickford J.L., Province V.M., Augenreich M.A., Bunsawat K., Alpenglow J.K., Wray D.W., Ratchford S.M.	Experimental Physiology	2021	Record concerns coronaviruses but describes neither a novel nor an attenuated coronavirus
	10.1038/s41590-021-01035-8	Altered ISGylation drives aberrant macrophage-dependent immune responses during SARS-CoV-2 infection	Munnur D., Teo Q., Eggermont D., Lee H.H.Y., Thery F., Ho J., van Leur S.W., Ng W.W.S., Siu L.Y.L., Beling A., Ploegh H., Pinto-Fernandez A., Damianou A., Kessler B., Impens F., Mok C.K.P., Sanyal S.	Nature Immunology	2021	Record concerns coronaviruses but describes neither a novel nor an attenuated coronavirus
9426441	10.1006/viro.1997.8877	Altered pathogenesis of a mutant of the murine coronavirus MHV-A59 is associated with a Q159L amino acid substitution in the spike protein	Leparc-Goffart I., Hingley S.T., Chua M.M., Jiang X., Lavi E., Weiss S.R.	Virology	1997	Record describes coronavirus attenuation method that cannot be applied to SARS-CoV-2
17942563	10.1128/JVI.01702-07	Altered pathogenesis of porcine respiratory coronavirus in pigs due to immunosuppressive effects of dexamethasone: implications for corticosteroid use in treatment of severe acute respiratory syndrome coronavirus	Jung K, Alekseev KP, Zhang X, Cheon DS, Vlasova AN, Saif LJ.	J Virol	2007	Record concerns coronaviruses but describes neither a novel nor an attenuated coronavirus
1655870	10.1016/0168-8278(91)90865-9	Altered pathogenicity in the liver induced by a mouse hepatitis virus type 3 thermosensitive mutant	Martin J.-P., Bingen A., Koehren F., Gut J.-P., Kirn A.	Journal of Hepatology	1991	PASS	The sequence of coronavirus described by the record is not known
26616599	10.1016/j.virusres.2015.11.021	Altered pathogenicity of a tl/CH/LDT3/03 genotype infectious bronchitis coronavirus due to natural recombination in the 5'- 17 kb region of the genome	Han Z., Zhang T., Xu Q., Gao M., Chen Y., Wang Q., Zhao Y., Shao Y., Li H., Kong X., Liu S.	Virus Research	2016	Record describes coronavirus attenuation method that cannot be applied to SARS-CoV-2
19523910	10.1016/j.vaccine.2009.05.072	Altered pathogenicity, immunogenicity, tissue tropism and 3′-7 kb region sequence of an avian infectious bronchitis coronavirus strain after serial passage in embryos	Liu S., Zhang X., Gong L., Yan B., Li C., Han Z., Shao Y., Li H., Kong X.	Vaccine	2009	PASS	Record describes coronavirus attenuation method that cannot be applied to SARS-CoV-2
8209733	10.1007/978-1-4615-2996-5_34	Altered proteolytic processing of the polymerase polyprotein in RNA(-) temperature sensitive mutants of murine coronavirus	Baker S.C., Gao H., Baric R.S.	Advances in Experimental Medicine and Biology	1994	PASS	The sequence of coronavirus described by the record is not known
32360578	10.1016/j.jtho.2020.04.016	Alternative Multidisciplinary Management Options for Locally Advanced NSCLC During the Coronavirus Disease 2019 Global Pandemic	Kumar S., Chmura S., Robinson C., Lin S.H., Gadgeel S.M., Donington J., Feliciano J., Stinchcombe T.E., Werner-Wasik M., Edelman M.J., Moghanaki D.	Journal of Thoracic Oncology	2020	Record concerns coronaviruses but describes neither a novel nor an attenuated coronavirus
35035515	10.1016/j.nantod.2022.101393	Amantadine-assembled nanostimulator enhances dimeric RBD antigen-elicited cross-neutralization against SARS-CoV-2 strains	Zhang Y, Wang R, He C, Zhang YF, Luo Z, Luo J, Chen S, Jin Y, Xie B, Liu Y.	Nano Today	2022	Record concerns coronaviruses but describes neither a novel nor an attenuated coronavirus
31472338	10.1016/j.vetimm.2019.109932	Ambient ammonia does not appear to inhibit the immune response to infectious bronchitis virus vaccination and protection from homologous challenge in broiler chickens	Aston EJ, Jackwood MW, Gogal RM Jr, Hurley DJ, Fairchild BD, Hilt DA, Cheng S, Tensa LR, Garcia M, Jordan BJ.	Vet Immunol Immunopathol	2019	The sequence of coronavirus described by the record is not known
		Ameliorative potentials of human umbilical cord derived mesenchymal stem cells in dextran sulphate sodium induced acute colitis in nod.CB17-PRKDCSCID/J mice	Banerjee A., Burra P., Di Liddo R., Arcidiacono D., Pathak S., Cappon A., Bo P., Conconi M.T., Parnigotto P.P., Russo F.P., Sturniolo G.C., D'Incà R.	Gastroenterology (2012) 142:5 SUPPL. 1 (S719). Date of Publication: May 2012	2012	Record does not concern coronaviruses
12919742	10.1016/S0042-6822(03)00248-4	Amino acid substitutions within the heptad repeat domain 1 of murine coronavirus spike protein restrict viral antigen spread in the central nervous system	Tsai J.C., De Groot L., Pinon J.D., Iacono K.T., Phillips J.J., Seo S.-H., Lavi E., Weiss S.R.	Virology	2003	PASS	PASS
2462314	10.1016/0168-1702(88)90039-1	Amino acids within hypervariable region 1 of avian coronavirus IBV (Massachusetts serotype) spike glycoprotein are associated with neutralization epitopes	Cavanagh D., Davis P.J., Mockett A.P.A.	Virus Research	1988	Record concerns coronaviruses but describes neither a novel nor an attenuated coronavirus
26915320		AMPK activator down-regulates the expression of tissue factor in fulminant hepatitis mice	Dai J., Lin L., Zhou D., Ai Q., Ge P., Zhang L.	Sheng li xue bao : [Acta physiologica Sinica]	2016	Record does not concern coronaviruses
8627235	10.1099/0022-1317-77-2-309	An adenovirus recombinant expressing the spike glycoprotein of porcine respiratory coronavirus is immunogenic in swine	Callebaut P., Enjuanes L., Pensaert M.	Journal of General Virology	1996	Record concerns coronaviruses but describes neither a novel nor an attenuated coronavirus
	10.1161/circ.144.suppl-1.14408	An angiotensin receptor blocker in the presence of sars cov2 pseudovirus does not change protein expression of ace2 in human heart cell models	Das M., Schilling T., Lovano B., Castel L., Kim D., Karnik S.S., Barnard J., Van Wagoner D.R., Jung J., Chung M.K.	Circulation	2021	Record concerns coronaviruses but describes neither a novel nor an attenuated coronavirus
16979681	10.1016/j.virol.2006.08.020	An arginine-to-proline mutation in a domain with undefined functions within the helicase protein (Nsp13) is lethal to the coronavirus infectious bronchitis virus in cultured cells	Fang S., Chen B., Tay F.P.L., Ng B.S., Liu D.X.	Virology	2007	Record describes a novel non-attenuated coronavirus
33636510	10.1016/j.vetmic.2021.109014	An attenuated TW-like infectious bronchitis virus strain has potential to become a candidate vaccine and S gene is responsible for its attenuation	Xu G., Ma S., Cheng J., Zhao Y., Zhang G.	Veterinary Microbiology	2021	PASS	The sequence of coronavirus described by the record is not known
16055920	10.1093/nar/gki731	An atypical RNA pseudoknot stimulator and an upstream attenuation signal for -1 ribosomal frameshifting of SARS coronavirus	Su M.-C., Chang C.-T., Chu C.-H., Tsai C.-H., Chang K.-Y.	Nucleic Acids Research	2005	PASS	Record concerns coronaviruses but describes neither a novel nor an attenuated coronavirus
34449757	10.3390/tropicalmed6030151	An Autochthonous Outbreak of the SARS-CoV-2 P.1 Variant of Concern in Southern Italy, April 2021	Loconsole D, Sallustio A, Centrone F, Casulli D, Ferrara MM, Sanguedolce A, Accogli M, Chironna M.	Trop Med Infect Dis	2021	Record concerns coronaviruses but describes neither a novel nor an attenuated coronavirus
34699776	10.1016/j.jviromet.2021.114341	An easy pipeline for one-step purification of SARS-CoV-2 nucleocapsid protein from insect cell suspension culture	de Camargo B.R., da Silva L.A., de Oliveira A.S., Ribeiro B.M.	Journal of Virological Methods	2022	Record concerns coronaviruses but describes neither a novel nor an attenuated coronavirus
33917088	10.3390/ijerph18083873	An emerging innovative uv disinfection technology (Part ii): Virucide activity on sars-cov-2	Messina G., Della Camera A., Ferraro P., Amodeo D., Corazza A., Nante N., Cevenini G.	International Journal of Environmental Research and Public Health	2021	Record concerns coronaviruses but describes neither a novel nor an attenuated coronavirus
9066025	10.1016/s0264-410x(96)00172-7	An Escherichia coli CS31A fibrillum chimera capable of inducing memory antibodies in outbred mice following booster immunization with the entero-pathogenic coronavirus transmissible gastroenteritis virus	Der Vartanian M, Girardeau JP, Martin C, Rousset E, Chavarot M, Laude H, Contrepois M.	Vaccine	1997	Record concerns coronaviruses but describes neither a novel nor an attenuated coronavirus
35112734	10.1002/jmv.27634	An exploratory study on the propagation of SARS-CoV-2 variants: Omicron is the most predominant variant	R M, K S.	J Med Virol	2022	Record concerns coronaviruses but describes neither a novel nor an attenuated coronavirus
33299503	10.1155/2020/7079356	An Immunoinformatics Study to Predict Epitopes in the Envelope Protein of SARS-CoV-2	Jakhar R, Gakhar SK.	Can J Infect Dis Med Microbiol	2020	Record concerns coronaviruses but describes neither a novel nor an attenuated coronavirus
18645889	10.1080/03079459608419172	An in vitro comparison of the virulence of seven strains of infectious bronchitis virus using tracheal and oviduct organ cultures	Raj GD, Jones RC.	Avian Pathol	1996	Record does not describe an in vivo study
34352457	10.1016/j.compbiomed.2021.104703	An in-depth in silico and immunoinformatics approach for designing a potential multi-epitope construct for the effective development of vaccine to combat against SARS-CoV-2 encompassing variants of concern and interest	Saba AA, Adiba M, Saha P, Hosen MI, Chakraborty S, Nabi AHMN.	Comput Biol Med	2021	Record concerns coronaviruses but describes neither a novel nor an attenuated coronavirus
33295839	10.1080/22221751.2020.1861914	An infectious cDNA clone of a growth attenuated Korean isolate of MERS coronavirus KNIH002 in clade B	Kim M., Cho H., Lee S.-H., Park W.-J., Kim J.-M., Moon J.-S., Kim G.-W., Lee W., Jung H.-G., Yang J.-S., Choi J.-H., Lee J.-Y., Kim S.S., Oh J.-W.	Emerging Microbes and Infections	2020	PASS	Record describes coronavirus attenuation method that cannot be applied to SARS-CoV-2
	10.31782/IJCRR.2020.SP34	An institutional based study on imaging conundrum of newly diagnosed coronavirus disease 2019 (Covid-19) – a retrospective analysis in India population	Goel V., Goyal B.R., Mathur A., Chand G., Marwaha V., Dhar A.	International Journal of Current Research and Review	2020	Record concerns coronaviruses but describes neither a novel nor an attenuated coronavirus
33416095	10.3892/ijmm.2020.4828	An integrative look at SARS-CoV-2 (Review)	Ortega M.A., Fraile-Martínez O., García-Montero C., García-Gallego S., Sánchez-Trujillo L., Torres-Carranza D., Álvarez-Mon M.Á., Pekarek L., García-Honduvilla N., Bujan J., Álvarez-Mon M., Asúnsolo Á., de la Torre B.	International Journal of Molecular Medicine	2021	Record is a review on coronavirus attenuation
34289385	10.1016/j.celrep.2021.109452	An intranasal vaccine durably protects against SARS-CoV-2 variants in mice	Hassan A.O., Shrihari S., Gorman M.J., Ying B., Yaun D., Raju S., Chen R.E., Dmitriev I.P., Kashentseva E., Adams L.J., Mann C., Davis-Gardner M.E., Suthar M.S., Shi P.-Y., Saphire E.O., Fremont D.H., Curiel D.T., Alter G., Diamond M.S.	Cell Reports	2021	Record concerns coronaviruses but describes neither a novel nor an attenuated coronavirus
	10.1080/03079458008418410	An inverse age resistance of chicken kidneys to infectious bronchitis virus	Macdonald J.W., Randall C.J., McMartin D.A.	Avian Pathology	1980	The sequence of coronavirus described by the record is not known
5039746	10.1007/BF01241452	An investigation of the replication of coronaviruses in suspension cultures of L132 cells	Bradburne A.F.	Archiv für die gesamte Virusforschung	1972	Record concerns coronaviruses but describes neither a novel nor an attenuated coronavirus
34608454	10.1016/j.eclinm.2021.101143	An observational study of breakthrough SARS-CoV-2 Delta variant infections among vaccinated healthcare workers in Vietnam	Chau NVV, Ngoc NM, Nguyet LA, Quang VM, Ny NTH, Khoa DB, Phong NT, Toan LM, Hong NTT, Tuyen NTK, Phat VV, Nhu LNT, Truc NHT, That BTT, Thao HP, Thao TNP, Vuong VT, Tam TTT, Tai NT, Bao HT, Nhung HTK, Minh NTN, Tien NTM, Huy NC, Choisy M, Man DNH, Ty DTB, Anh NT, Uyen LTT, Tu TNH, Yen LM, Dung NT, Hung LM, Truong NT, Thanh TT, Thwaites G, Tan LV.	EClinicalMedicine	2021	Record concerns coronaviruses but describes neither a novel nor an attenuated coronavirus
26587388	10.1016/j.mex.2015.09.003	An optimised method for the production of MERS-CoV spike expressing viral pseudotypes	Grehan K, Ferrara F, Temperton N.	MethodsX	2015	Record concerns coronaviruses but describes neither a novel nor an attenuated coronavirus
	10.1007/978-3-662-43836-7_8	An oral vaccine for tgev immunization of pigs	Rajan V.	Biotechnology in Agriculture and Forestry	2014	Record concerns coronaviruses but describes neither a novel nor an attenuated coronavirus
		AN OUTBREAK OF FELINE INFECTIOUS PERITONITIS IN A COLONY OF CORNISH REX CATS	PANZERO, RA	FELINE PRACTICE	1992	Record describes a novel non-attenuated coronavirus
35040422	10.2174/1872208316666220118094344	An Outline of Contributing Vaccine Technologies for SARS CoV2 Advancing in Clinical and Preclinical Phase-Trials	Naz S.S., Munir I.	Recent patents on biotechnology	2022	Record is a review on coronavirus attenuation
8209768	10.1007/978-1-4615-2996-5_73	An overview of successful TGEV vaccination strategies and discussion on the interrelationship between TGEV and PRCV	Welter M.W., Horstman M.P., Welter C.J., Welter L.M.	Advances in Experimental Medicine and Biology	1994	Record is a review on coronavirus attenuation
	10.1016/j.bios.2021.113729	An ultrasensitive molecularly imprinted polymer-based electrochemical sensor for the determination of SARS-CoV-2-RBD by using macroporous gold screen-printed electrode	Amouzadeh Tabrizi M., Fernández-Blázquez J.P., Medina D.M., Acedo P.	Biosensors and Bioelectronics	2022	Record concerns coronaviruses but describes neither a novel nor an attenuated coronavirus
	10.1186/s43141-021-00233-z	Analysing the impact of the two most common SARS-CoV-2 nucleocapsid protein variants on interactions with membrane protein in silico	Quayum S.T., Hasan S.	Journal of Genetic Engineering and Biotechnology	2021	Record concerns coronaviruses but describes neither a novel nor an attenuated coronavirus
	10.1177/1176934320918861	Analysis of Codon Usage and Nucleotide Bias in Middle East Respiratory Syndrome Coronavirus Genes	Hussain S., Shinu P., Islam M.M., Chohan M.S., Rasool S.T.	Evolutionary Bioinformatics	2020	Record deals with coronavirus attenuation in only theoretical aspects
9733825	10.1128/jvi.72.10.7885-7894.1998	Analysis of constructed E gene mutants of mouse hepatitis: Virus confirms a pivotal role for E protein in coronavirus assembly	Fischer F., Stegen C.F., Masters P.S., Samsonoff W.A.	Journal of Virology	1998	Record does not describe an in vivo study
30918076	10.1128/JVI.02140-18	Analysis of coronavirus temperature-sensitive mutants reveals an interplay between the macrodomain and Papain-like protease impacting replication and pathogenesis	Deng X., Mettelman R.C., O'Brien A., Thompson J.A., O'Brien T.E., Baker S.C.	Journal of Virology	2019	PASS	Record describes coronavirus attenuation method that cannot be applied to SARS-CoV-2
17428870	10.1128/JVI.00049-07	Analysis of murine hepatitis virus strain A59 temperature-sensitive mutant TS-LA6 suggests that nsp10 plays a critical role in polyprotein processing	Donaldson E.F., Graham R.L., Sims A.C., Denison M.R., Baric R.S.	Journal of Virology	2007	PASS	Record does not describe an in vivo study
25000989	10.1007/s11262-014-1097-1	Analysis of S1 gene of avian infectious bronchitis virus isolated in southern China during 2011–2012	Feng K., Xue Y., Wang F., Chen F., Shu D., Xie Q.	Virus Genes	2014	Record concerns coronaviruses but describes neither a novel nor an attenuated coronavirus
34754982	10.1016/j.genrep.2021.101420	Analysis of SARS-COV2 spike protein variants among Iraqi isolates	Sabir DK.	Gene Rep	2022	Record concerns coronaviruses but describes neither a novel nor an attenuated coronavirus
	10.1182/blood-2020-143393	Analysis of Sars-Cov-2-Associated Proteins Identify Tank-Binding Kinase-1 As an Immunotherapeutic Target in Multiple Myeloma	Ray A., Du T., Chauhan K., Song Y., Chauhan D., Anderson K.	Blood (2020) 136 Supplement 1 (29-30). Date of Publication: 5 Nov 2020	2020	Record concerns coronaviruses but describes neither a novel nor an attenuated coronavirus
7745691	10.1128/jvi.69.6.3449-3457.1995	Analysis of second-site revertants of a murine coronavirus nucleocapsid protein deletion mutant and construction of nucleocapsid protein mutants by targeted RNA recombination	Peng D., Koetzner C.A., Masters P.S.	Journal of Virology	1995	PASS	The sequence of coronavirus described by the record is not known
25721384	10.1080/03079457.2015.1022857	Analysis of the complete genomic sequences of two virus subpopulations of the Australian infectious bronchitis virus vaccine VicS	Quinteros J.A., Markham P.F., Lee S.-W., Hewson K.A., Hartley C.A., Legione A.R., Coppo M.J.C., Vaz P.K., Browning G.F.	Avian Pathology	2015	Record describes coronavirus attenuation method that cannot be applied to SARS-CoV-2
28574363	10.1109/TCBB.2017.2702588	Analysis of the Genome Sequence and Prediction of B-Cell Epitopes of the Envelope Protein of Middle East Respiratory Syndrome-Coronavirus	Xie Q, He X, Yang F, Liu X, Li Y, Liu Y, Yang Z, Yu J, Zhang B, Zhao W.	IEEE/ACM Trans Comput Biol Bioinform	2018	Record concerns coronaviruses but describes neither a novel nor an attenuated coronavirus
34973510	10.1016/j.esmoop.2021.100359	Analysis of the humoral and cellular immune response after a full course of BNT162b2 anti-SARS-CoV-2 vaccine in cancer patients treated with PD-1/PD-L1 inhibitors with or without chemotherapy: an update after 6 months of follow-up	Lasagna A, Lilleri D, Agustoni F, Percivalle E, Borgetto S, Alessio N, Comolli G, Sarasini A, Bergami F, Sammartino JC, Ferrari A, Zavaglio F, Arena F, Secondino S, Falzoni M, Schiavo R, Lo Cascio G, Cavanna L, Baldanti F, Pedrazzoli P, Cassaniti I.	ESMO Open	2021	Record concerns coronaviruses but describes neither a novel nor an attenuated coronavirus
	10.1016/j.provac.2010.03.009	Analysis of the mechanism by which BALB/c mice having prior immunization with nucleocapsid protein of SARS-CoV develop severe pneumonia after SARS-CoV infection	Yasui F., Kai C., Saito K., Inoue S., Yoneda M., Morita K., Mizuno K., Kohara M.	Procedia in Vaccinology	2010	Record concerns coronaviruses but describes neither a novel nor an attenuated coronavirus
	10.1007/978-0-387-33012-9_72	Analysis of the N Protein in Feline Coronavirus Strains in Italy	Battilani M., Foschi A., Scagliarini A., Ciulli S., Prosperi S., Morganti L.	Advances in Experimental Medicine and Biology	2006	Record concerns coronaviruses but describes neither a novel nor an attenuated coronavirus
	10.7717/peerj.6843	Analysis of the spike, ORF3, and nucleocapsid genes of porcine epidemic diarrhea virus circulating on Thai swine farms, 2011–2016	Tuanthap S., Vongpunsawad S., Phupolphan C., Duang-In A., Wattanaphansak S., Assavacheep P., Theamboonlers A., Luengyosluechakul S., Amonsin A., Poovorawan Y.	PeerJ	2019	Record describes a novel non-attenuated coronavirus
33735872	10.1159/000515342	Analysis of Three Mutations in Italian Strains of SARS-CoV-2: Implications for Pathogenesis	Benvenuto D, Benedetti F, Demir AB, Ciccozzi M, Zella D.	Chemotherapy	2021	Record describes a novel non-attenuated coronavirus
35042228	10.1038/s41591-022-01700-x	Ancestral SARS-CoV-2-specific T cells cross-recognize the Omicron variant	Gao Y, Cai C, Grifoni A, Müller TR, Niessl J, Olofsson A, Humbert M, Hansson L, Österborg A, Bergman P, Chen P, Olsson A, Sandberg JK, Weiskopf D, Price DA, Ljunggren HG, Karlsson AC, Sette A, Aleman S, Buggert M.	Nat Med	2022	Record concerns coronaviruses but describes neither a novel nor an attenuated coronavirus
32977949	10.1016/j.bbrc.2020.08.086	Andrographolide and its fluorescent derivative inhibit the main proteases of 2019-nCoV and SARS-CoV through covalent linkage	Shi T.-H., Huang Y.-L., Chen C.-C., Pi W.-C., Hsu Y.-L., Lo L.-C., Chen W.-Y., Fu S.-L., Lin C.-H.	Biochemical and Biophysical Research Communications	2020	Record concerns coronaviruses but describes neither a novel nor an attenuated coronavirus
32129518	10.1002/ddr.21656	Angiotensin receptor blockers as tentative SARS-CoV-2 therapeutics	Gurwitz D.	Drug Dev Res	2020	Record concerns coronaviruses but describes neither a novel nor an attenuated coronavirus
33600934	10.1016/j.jvs.2021.01.051	Angiotensin-converting enzyme 2, coronavirus disease 2019, and abdominal aortic aneurysms	Xu, BH; Li, G; Guo, J; Ikezoe, T; Kasirajan, K; Zhao, SH; Dalman, RL	JOURNAL OF VASCULAR SURGERY	2021	Record concerns coronaviruses but describes neither a novel nor an attenuated coronavirus
32427636	10.1097/CRD.0000000000000319	Angiotensin-Converting Enzyme Inhibitors and Angiotensin Receptor Blockers in Patients with Coronavirus Disease 2019: Friend or Foe?	Shyh G.I., Nawarskas J.J., Cheng-Lai A.	Cardiology in Review	2020	Record is a review on coronavirus attenuation
15742624		Animal coronavirus vaccines: Lessons for SARS	Saif L.J.	Developments in Biologicals	2005	Record is a review on coronavirus attenuation
17499378	10.1016/j.virusres.2007.03.025	Animal models and vaccines for SARS-CoV infection	Roberts A, Lamirande EW, Vogel L, Jackson JP, Paddock CD, Guarner J, Zaki SR, Sheahan T, Baric R, Subbarao K.	Virus Res	2008	Record concerns coronaviruses but describes neither a novel nor an attenuated coronavirus
30914508	10.1128/mBio.00319-19	Antagonism of dsRNA-induced innate immune pathways by NS4a and NS4b accessory proteins during MERS coronavirus infection	Comar C.E., Goldstein S.A., Li Y., Yount B., Baric R.S., Weiss S.R.	mBio	2019	Record describes coronavirus attenuation method that cannot be applied to SARS-CoV-2
27558415	10.1128/JVI.01423-16	Antagonism of RNase L is required for murine coronavirus replication in Kupffer cells and liver sinusoidal endothelial cells but not in hepatocytes	Li Y., Weiss S.R.	Journal of Virology	2016	Record describes coronavirus attenuation method that cannot be applied to SARS-CoV-2
34358019	10.3390/pathogens10070869	Antibodies Targeting Two Epitopes in SARS-CoV-2 Neutralize Pseudoviruses with the Spike Proteins from Different Variants	Yang CH, Li HC, Lee WH, Lo SY.	Pathogens	2021	Record concerns coronaviruses but describes neither a novel nor an attenuated coronavirus
33732459	10.1002/cti2.1260	Antibodies to neutralising epitopes synergistically block the interaction of the receptor-binding domain of SARS-CoV-2 to ACE 2	Pandey M, Ozberk V, Eskandari S, Shalash AO, Joyce MA, Saffran HA, Day CJ, Lepletier A, Spillings BL, Mills JL, Calcutt A, Fan F, Williams JT, Stanisic DI, Hattingh L, Gerrard J, Skwarczynski M, Mak J, Jennings MP, Toth I, Tyrrell DL, Good MF.	Clin Transl Immunology	2021	Record concerns coronaviruses but describes neither a novel nor an attenuated coronavirus
	10.1177/13524585211047080	Antibody and T-cell responses to SARS-CoV-2 vaccines in MS patients on Ocrelizumab and other disease-modifying therapies: Preliminary results of an ongoing, prospective study	Kister I., Patskovsky Y., Voloshyna I., Ferstler N., Curtin R., Yogambigai V., Nyovanie S., Mulligan M.J., Kim J., Tardio E., Rimler Z., Perdomo K., Bacon T., Zhovtis Ryerson L., Samanovic-Golden M., Cornelius A., Raposo C., Priest J., Winger R., Krogsgaard M., Silverman G.J.	Multiple Sclerosis Journal (2021) 27:2 SUPPL (755-756). Date of Publication: 1 Oct 2021	2021	Record concerns coronaviruses but describes neither a novel nor an attenuated coronavirus
33852911	10.1016/j.cell.2021.03.055	Antibody evasion by the P.1 strain of SARS-CoV-2	Dejnirattisai W, Zhou D, Supasa P, Liu C, Mentzer AJ, Ginn HM, Zhao Y, Duyvesteyn HME, Tuekprakhon A, Nutalai R, Wang B, López-Camacho C, Slon-Campos J, Walter TS, Skelly D, Costa Clemens SA, Naveca FG, Nascimento V, Nascimento F, Fernandes da Costa C, Resende PC, Pauvolid-Correa A, Siqueira MM, Dold C, Levin R, Dong T, Pollard AJ, Knight JC, Crook D, Lambe T, Clutterbuck E, Bibi S, Flaxman A, Bi…	Cell	2021	Record concerns coronaviruses but describes neither a novel nor an attenuated coronavirus
11673540	10.4049/jimmunol.167.9.5254	Antibody is required for clearance of infectious murine hepatitis virus A59 from the central nervous system, but not the liver	Matthews A.E., Weiss S.R., Shlomchik M.J., Hannum L.G., Gombold J.L., Paterson Y.	Journal of Immunology	2001	Record concerns coronaviruses but describes neither a novel nor an attenuated coronavirus
34386006	10.3389/fimmu.2021.696370	Antibody Mediated Immunity to SARS-CoV-2 and Human Coronaviruses: Multiplex Beads Assay and Volumetric Absorptive Microsampling to Generate Immune Repertoire Cartography	Wang J, Li D, Zhou Q, Wiltse A, Zand MS.	Front Immunol	2021	Record concerns coronaviruses but describes neither a novel nor an attenuated coronavirus
	10.1182/blood-2021-147664	Antibody Response after Vaccination for Sars-Cov-2 in Patients with AL Amyloidosis and the Impact of Therapy	Kastritis E., Terpos E., Sklirou A.D., Theodorakakou F., Fotiou D., Papanagnou E.-D., Bagratuni T., Kanellias N., Migkou M., Ntanasis-Stathopoulos I., Malandrakis P., Charitaki I., Gavriatopoulou M., Trougakos I.P., Dimopoulos M.-A.	Blood	2021	Record concerns coronaviruses but describes neither a novel nor an attenuated coronavirus
187297		Antibody response in pigs inoculated with transmissible gastroenteritis virus and cross reactions among ten isolates	Kemeny L.J.	Canadian Journal of Comparative Medicine	1976	The sequence of coronavirus described by the record is not known
34960189	10.3390/vaccines9121442	Antibody Response of BNT162b2 and CoronaVac Platforms in Recovered Individuals Previously Infected by COVID-19 against SARS-CoV-2 Wild Type and Delta Variant	Zhang R, Khong KW, Leung KY, Liu D, Fan Y, Lu L, Chan PC, Chen L, To KK, Chen H, Yuen KY, Chan KH, Hung IF.	Vaccines (Basel)	2021	Record concerns coronaviruses but describes neither a novel nor an attenuated coronavirus
34603700	10.1093/ckj/sfab127	Antibody response to mRNA SARS-CoV-2 vaccines in haemodialysis patients	Paal, M; Arend, FM; Lau, T; Hasmann, S; Soreth-Rieke, D; Sorodoc-Otto, J; Beuthien, W; Krappe, J; Toepfer, M; von Gersdorff, G; Thaller, N; Rau, S; Northoff, B; Teupser, D; Bruegel, M; Fischereder, M; Schonermarck, U	CLINICAL KIDNEY JOURNAL	2021	Record concerns coronaviruses but describes neither a novel nor an attenuated coronavirus
11873823	10.1093/ps/81.2.149	Antibody responses and morbidity following infection with infectious bronchitis virus and challenge with Escherichia coli, in lines divergently selected on antibody response	Yunis R., Ben-David A., Heller E.D., Cahaner A.	Poultry Science	2002	The sequence of coronavirus described by the record is not known
4629259	10.1128/iai.6.3.289-301.1972	Antibody responses in serum, colostrum, and milk of swine after infection or vaccination with transmissible gastroenteritis virus	Bohl EH, Gupta RK, Olquin MV, Saif LJ.	Infect Immun	1972	The sequence of coronavirus described by the record is not known
7924247	10.1016/0147-9571(94)90039-6	Antibody responses in spiral colon, ileum, and jejunum of bovine coronavirus-infected neonatal calves	Kapil S., Trent A.M., Goyal S.M.	Comparative Immunology, Microbiology and Infectious Diseases	1994	The sequence of coronavirus described by the record is not known
12204951	10.1128/CDLI.9.5.1010-1013.2002	Antibody responses of cattle with respiratory coronavirus infections during pathogenesis of shipping fever pneumonia are lower with antigens of enteric strains than with those of a respiratory strain	Lin, XQ; O'Reilly, KL; Storz, J	CLINICAL AND DIAGNOSTIC LABORATORY IMMUNOLOGY	2002	PASS	The sequence of coronavirus described by the record is not known
5022346	10.1136/vr.90.9.248	Antibody responses to a live Newcastle disease vaccine when combined with a live infectious bronchitis vaccine.	Bracewell C.D., Dawson P.S., Allan W.H.	The Veterinary record	1972	The sequence of coronavirus described by the record is not known
33785883	10.1038/s41575-021-00445-1	Antibody responses to SARS-CoV-2 infection are attenuated in infliximab-treated patients with IBD	Ray K.	Nature Reviews Gastroenterology and Hepatology	2021	Record concerns coronaviruses but describes neither a novel nor an attenuated coronavirus
34857462	10.1016/j.jiac.2021.11.021	Antibody titers against the Alpha, Beta, Gamma, and Delta variants of SARS-CoV-2 induced by BNT162b2 vaccination measured using automated chemiluminescent enzyme immunoassay	Kato H, Miyakawa K, Ohtake N, Go H, Yamaoka Y, Yajima S, Shimada T, Goto A, Nakajima H, Ryo A.	J Infect Chemother	2022	Record concerns coronaviruses but describes neither a novel nor an attenuated coronavirus
		ANTIBODY-DEPENDENT ENHANCEMENT OF FELINE INFECTIOUS PERITONITIS VIRUS-INFECTION	SCOTT, FW; OLSEN, CW; CORAPI, WV	FELINE PRACTICE	1995	PASS	Report not retrieved
28730523	10.1007/s00705-017-3489-8	Antibody-dependent enhancement of serotype II feline enteric coronavirus infection in primary feline monocytes	Takano T., Nakaguchi M., Doki T., Hohdatsu T.	Archives of Virology	2017	Record concerns coronaviruses but describes neither a novel nor an attenuated coronavirus
31178378	10.1016/j.vaccine.2019.05.074	Antibody-mediated protection against MERS-CoV in the murine model	New RRC, Moore BD, Butcher W, Mahood R, Lever MS, Smither S, O'Brien L, Weller SA, Bayliss M, Gibson LCD, Macleod C, Bogus M, Harvey R, Almond N, Williamson ED.	Vaccine	2019	Record concerns coronaviruses but describes neither a novel nor an attenuated coronavirus
		Anti-CD200 attenuates concanavalin a induced hepatitis via modulating the imbalance of CD4 + T lymphocyte differentiation in mice	Zhao X., Ding S., Geng C., Man Z., Pan M., Sun L., Hu B., Wang H.	American Journal of Translational Research	2018	Record does not concern coronaviruses
33241658	10.1111/jcmm.16117	Anti-coronavirus disease 2019 (COVID-19) targets and mechanisms of puerarin	Qin, XY; Huang, C; Wu, K; Li, Y; Liang, X; Su, M; Li, R	JOURNAL OF CELLULAR AND MOLECULAR MEDICINE	2021	Record concerns coronaviruses but describes neither a novel nor an attenuated coronavirus
32920049	10.1016/j.jmb.2020.09.006	Anti-Frameshifting Ligand Active against SARS Coronavirus-2 Is Resistant to Natural Mutations of the Frameshift-Stimulatory Pseudoknot	Neupane K., Munshi S., Zhao M., Ritchie D.B., Ileperuma S.M., Woodside M.T.	Journal of Molecular Biology	2020	Record concerns coronaviruses but describes neither a novel nor an attenuated coronavirus
1282756	10.1016/0378-1135(92)90053-V	Antigen selection and presentation to protect against transmissible gastroenteritis coronavirus	Enjuanes L., Suñé C., Gebauer F., Smerdou C., Camacho A., Antón I.M., González S., Talamillo A., Méndez A., Ballesteros M.L., Sánchez C.	Veterinary Microbiology	1992	Record concerns coronaviruses but describes neither a novel nor an attenuated coronavirus
	10.1590/S0102-09352001000200002	Antigenic affinities of infectious bronchitis virus field isolates to Massachusetts M41 strain	Souza, MB; Martins, NRS; Resende, JS	ARQUIVO BRASILEIRO DE MEDICINA VETERINARIA E ZOOTECNIA	2001	Record does not describe an in vivo study
		Antigenic affinities of infectious bronchitis virus field isolates to Massachusetts M41 strain [Afinidades antigênicas de amostras de campo do vírus da bronquite infecciosa das galinhas com a amostra Massachusetts M41]	Souza M.B., Martins N.R.S., Resende J.S.	Arquivo Brasileiro de Medicina Veterinaria e Zootecnia	2001	Record not in English
2159566	10.1128/jvi.64.6.3112-3118.1990	Antigenic and genomic relationships among turkey and bovine enteric coronaviruses	Dea S., Verbeek A.J., Tijssen P.	Journal of Virology	1990	Record concerns coronaviruses but describes neither a novel nor an attenuated coronavirus
	10.1080/03079459808419387	Antigenic and immunogenic characterization of infectious bronchitis virus strains isolated in China between 1986 and 1995	Wu Z.Q., Yang Q.W., Fu C., Zhao X.Y., Ignjatovic J.	Avian Pathology	1998	Record describes a novel non-attenuated coronavirus
16731915	10.1128/JVI.00083-06	Antigenic and immunogenic characterization of recombinant baculovirus-expressed severe acute respiratory syndrome coronavirus spike protein: implication for vaccine design	He Y, Li J, Heck S, Lustigman S, Jiang S.	J Virol	2006	Record concerns coronaviruses but describes neither a novel nor an attenuated coronavirus
31847269	10.3390/v11121154	Antigenic and pathogenic characteristics of QX-type avian infectious bronchitis virus strains isolated in Southwestern China	Li S., Du L., Xia J., Du J., You G., Wen Y., Huang X., Zhao Q., Han X., Yan Q., Wu R., Cui M., Cao S., Huang Y.	Viruses	2019	Record describes a novel non-attenuated coronavirus
9152932	10.1292/jvms.59.253	Antigenic and plaque variations of serotype II feline infectious peritonitis coronaviruses	Mochizuki M, Mitsutake Y, Miyanohara Y, Higashihara T, Shimizu T, Hohdatsu T.	J Vet Med Sci	1997	The sequence of coronavirus described by the record is not known
2472464	10.1099/0022-1317-70-7-1725	Antigenic and polypeptide structure of turkey enteric coronaviruses as defined by monoclonal antibodies	Dea S, Tijssen P.	J Gen Virol	1989	Record concerns coronaviruses but describes neither a novel nor an attenuated coronavirus
34905077	10.1007/s00216-021-03806-6	Antigenic characterization of influenza and SARS-CoV-2 viruses	Wang Y., Tang C.Y., Wan X.-F.	Analytical and bioanalytical chemistry	2021	Record concerns coronaviruses but describes neither a novel nor an attenuated coronavirus
3599183	10.1128/jvi.61.8.2607-2613.1987	Antigenic comparison of feline coronavirus isolates: evidence for markedly different peplomer glycoproteins.	Fiscus S.A., Teramoto Y.A.	Journal of virology	1987	Record concerns coronaviruses but describes neither a novel nor an attenuated coronavirus
		Antigenic Epitope prediction of small envelope protein and designing a vaccine by using Reverse vaccinology approach against SARS Coronavirus Tor2 strain	Kumar, A; Bhattacharya, A; Kashyap, A	2013 15TH INTERNATIONAL CONFERENCE ON ADVANCED COMPUTING TECHNOLOGIES (ICACT)	2013	Record concerns coronaviruses but describes neither a novel nor an attenuated coronavirus
	10.1109/ICACT.2013.6710500	Antigenic epitope prediction of small envelope protein and designing a vaccine by using reverse vaccinology approach against SARS coronavirus Tor2 strain	Kumar A., Bhattacharya A., Kashyap A.	2013 15th International Conference on Advanced Computing Technologies, ICACT 2013	2013	Record concerns coronaviruses but describes neither a novel nor an attenuated coronavirus
34093454	10.3389/fmicb.2021.599562	Antigenic Evolution on a Global Scale Reveals the Potential Natural Selection of Severe Acute Respiratory Syndrome-Coronavirus 2 by Pre-existing Cross-Reactive T-Cell Immunity	Zhang C, Jin X, Chen X, Qiu L, Leng Q, Qiu T.	Front Microbiol	2021	Record concerns coronaviruses but describes neither a novel nor an attenuated coronavirus
25589635	10.1128/JVI.03196-14	Antigenic relationships among porcine epidemic diarrhea virus and transmissible gastroenteritis virus strains	Lin CM, Gao X, Oka T, Vlasova AN, Esseili MA, Wang Q, Saif LJ.	J Virol	2015	Record concerns coronaviruses but describes neither a novel nor an attenuated coronavirus
10664396	10.1007/s007050050656	Antigenic variation among bovine enteric coronaviruses (BECV) and bovine respiratory coronaviruses (BRCV) detected using monoclonal antibodies	Hasoksuz M., Lathrop S., Al-dubaib M.A., Lewis P., Saif L.J.	Archives of Virology	1999	Record describes a novel non-attenuated coronavirus
	10.1007/s00705-012-1587-1	Antigenic variation among recent Japanese isolates of bovine coronaviruses belonging to phylogenetically distinct genetic groups	Kanno T., Ishihara R., Hatama S., Uchida I.	Archives of Virology	2013	Record describes a novel non-attenuated coronavirus
33289207	10.1111/mec.15730	Antigenic variation of SARS-CoV-2 in response to immune pressure	Forni D, Cagliani R, Pontremoli C, Mozzi A, Pozzoli U, Clerici M, Sironi M.	Mol Ecol	2020	Record concerns coronaviruses but describes neither a novel nor an attenuated coronavirus
6271096	10.1007/BF01315263	Antigenicity of mouse hepatitis virus strain 3 subcomponents in C57 strain mice	Hasony H.J., Macnaughton M.R.	Archives of Virology	1981	Record concerns coronaviruses but describes neither a novel nor an attenuated coronavirus
33010815	10.1016/j.cell.2020.09.038	Antigen-Specific Adaptive Immunity to SARS-CoV-2 in Acute COVID-19 and Associations with Age and Disease Severity	Rydyznski Moderbacher C, Ramirez SI, Dan JM, Grifoni A, Hastie KM, Weiskopf D, Belanger S, Abbott RK, Kim C, Choi J, Kato Y, Crotty EG, Kim C, Rawlings SA, Mateus J, Tse LPV, Frazier A, Baric R, Peters B, Greenbaum J, Ollmann Saphire E, Smith DM, Sette A, Crotty S.	Cell	2020	Record concerns coronaviruses but describes neither a novel nor an attenuated coronavirus
16387696	10.1196/annals.1352.014	Anti-HIV, anti-poxvirus, and anti-SARS activity of a nontoxic, acidic plant extract from the Trifollium species Secomet-V/anti-Vac suggests that it contains a novel broad-spectrum antiviral	Kotwal G.J., Kaczmarek J.N., Leivers S., Ghebremariam Y.T., Kulkarni A.P., Bauer G., De Beer C., Preiser W., Mohamed A.R.	Annals of the New York Academy of Sciences	2005	Record concerns coronaviruses but describes neither a novel nor an attenuated coronavirus
1661313		Antiidiotypic vaccination against murine coronavirus infection	Lamarre A, Lecomte J, Talbot PJ.	J Immunol	1991	Record concerns coronaviruses but describes neither a novel nor an attenuated coronavirus
17068118	10.1152/ajpgi.00292.2006	Antinecrotic and antiapoptotic effects of hepatocyte growth factor on cholestatic hepatitis in a mouse model of bile-obstructive diseases	Li Z., Mizuno S., Nakamura T.	American Journal of Physiology - Gastrointestinal and Liver Physiology	2007	Record does not concern coronaviruses
33753421	10.1136/gutjnl-2021-324388	Anti-SARS-CoV-2 antibody responses are attenuated in patients with IBD treated with infliximab	Kennedy N.A., Goodhand J.R., Bewshea C., Nice R., Chee D., Lin S., Chanchlani N., Butterworth J., Cooney R., Croft N.M., Hart A.L., Irving P.M., Kok K.B., Lamb C.A., Limdi J.K., MacDonald J., McGovern D.P.B., Mehta S.J., Murray C.D., Patel K.V., Pollok R.C.G., Raine T., Russell R.K., Selinger C.P., Smith P.J., Bowden J., McDonald T.J., Lees C.W., Sebastian S., Powell N., Ahmad T.	Gut	2021	Record concerns coronaviruses but describes neither a novel nor an attenuated coronavirus
	10.1093/ecco-jcc/jjab075.002	Anti-SARS-CoV2 antibody responses are attenuated in patients with Inflammatory Bowel Disease treated with infliximab	Kennedy, NA; Goodhand, J; Bewshea, C; Nice, R; Chee, D; Lin, S; Chanchlani, N; Butterworth, J; Cooney, R; Croft, N; Hart, A; Irving, P; Kok, K; Lamb, C; Limdi, J; MacDonald, J; McGovern, D; Mehta, S; Murray, C; Patel, K; Pollok, R; Raine, T; Russell, R; Selinger, C; Smith, P; Bowden, J; McDonald, T; Lees, C; Sebastian, S; Powell, N; Ahmad, I	JOURNAL OF CROHNS & COLITIS	2021	Record concerns coronaviruses but describes neither a novel nor an attenuated coronavirus
34693968	10.1093/infdis/jiab540	Anti-SARS-CoV-2 hyperimmune globulin demonstrates potent neutralization and antibody-dependent cellular cytotoxicity and phagocytosis through N and S proteins	Díez JM, Romero C, Cruz M, Vandeberg P, Merritt WK, Pradenas E, Trinité B, Blanco J, Clotet B, Willis T, Gajardo R.	J Infect Dis	2021	Record concerns coronaviruses but describes neither a novel nor an attenuated coronavirus
34975897	10.3389/fimmu.2021.793191	Anti-SARS-CoV-2 Immunoglobulin Isotypes, and Neutralization Activity Against Viral Variants, According to BNT162b2-Vaccination and Infection History	Tarkowski M, de Jager W, Schiuma M, Covizzi A, Lai A, Gabrieli A, Corbellino M, Bergna A, Ventura CD, Galli M, Riva A, Antinori S.	Front Immunol	2021	Record concerns coronaviruses but describes neither a novel nor an attenuated coronavirus
21775467	10.1128/JVI.00671-11	Anti-severe acute respiratory syndrome coronavirus spike antibodies trigger infection of human immune cells via a pH- and cysteine protease-independent FcγR pathway	Jaume M, Yip MS, Cheung CY, Leung HL, Li PH, Kien F, Dutry I, Callendret B, Escriou N, Altmeyer R, Nal B, Daëron M, Bruzzone R, Peiris JS.	J Virol	2011	Record concerns coronaviruses but describes neither a novel nor an attenuated coronavirus
33309540	10.1016/j.antiviral.2020.104996	Antiviral activity against Middle East Respiratory Syndrome coronavirus by Montelukast, an anti-asthma drug	Gan H.J., Harikishore A., Lee J., Jeon S., Rajan S., Chen M.W., Neo J.L., Kim S., Yoon H.S.	Antiviral Research	2021	Record concerns coronaviruses but describes neither a novel nor an attenuated coronavirus
34991723	10.1186/s41182-021-00397-x	Antiviral activity of 5-aminolevulinic acid against variants of severe acute respiratory syndrome coronavirus 2	Ngwe Tun MM, Sakura T, Sakurai Y, Kurosaki Y, Inaoka DK, Shioda N, Yasuda J, Kita K, Morita K.	Trop Med Health	2022	Record concerns coronaviruses but describes neither a novel nor an attenuated coronavirus
8017030	10.1016/0378-1135(94)90007-8	Antiviral activity of interferon against transmissible gastroenteritis virus in cell culture and ligated intestinal segments in neonatal pigs	Jordan LT, Derbyshire JB.	Vet Microbiol	1994	Record concerns coronaviruses but describes neither a novel nor an attenuated coronavirus
	10.1002/pep2.24234	Antiviral activity of selected cathelicidins against infectious bronchitis virus	Verheije M.H., Coorens M., Weerts E.A.W.S., Berends A.J., van Harten R.M., Angel M., Kooij J., Ordonez S.R., van Beurden S.J., van Dijk A., Haagsman H.P., Veldhuizen E.J.A.	Peptide Science	2022	Record concerns coronaviruses but describes neither a novel nor an attenuated coronavirus
17344287	10.1128/JVI.02360-06	Antiviral effects of antisense morpholino oligomers in murine coronavirus infection models	Burrer R, Neuman BW, Ting JP, Stein DA, Moulton HM, Iversen PL, Kuhn P, Buchmeier MJ.	J Virol	2007	Record concerns coronaviruses but describes neither a novel nor an attenuated coronavirus
	10.1007/s12275-021-1367-2	Antiviral effects of human placenta hydrolysate (Laennec®) against SARS-CoV-2 in vitro and in the ferret model	Kim E.-H., Kim Y.-I., Jang S.-G., Im M., Jeong K., Choi Y.K., Han H.-J.	Journal of Microbiology	2021	Record concerns coronaviruses but describes neither a novel nor an attenuated coronavirus
32444382	10.1128/mBio.01114-20	Antiviral Efficacies of FDA-Approved Drugs against SARS-CoV-2 Infection in Ferrets	Park SJ, Yu KM, Kim YI, Kim SM, Kim EH, Kim SG, Kim EJ, Casel MAB, Rollon R, Jang SG, Lee MH, Chang JH, Song MS, Jeong HW, Choi Y, Chen W, Shin WJ, Jung JU, Choi YK.	mBio	2020	Record concerns coronaviruses but describes neither a novel nor an attenuated coronavirus
30978786	10.4315/0362-028X-50.10.862	Antiviral Substances in Raw Bovine Milk Active Against Bovine Rotavirus and Coronavirus	Panon G, Tache S, Labie C.	J Food Prot	1987	Record concerns coronaviruses but describes neither a novel nor an attenuated coronavirus
	10.1161/circ.142.suppl_3.14112	Apabetalone (RVX-208) Reduces ACE2 Expression in Human Cell Culture Systems, Which Could Attenuate SARS-CoV-2 Viral Entry	Gilham, D; Fu, L; Tsujikawa, LM; Rakai, B; Wasiak, S; Stotz, S; Sarsons, C; Sweeney, M; Johansson, J; Wong, N; Kulikowski, E	CIRCULATION	2020	Record concerns coronaviruses but describes neither a novel nor an attenuated coronavirus
		APABETALONE (RVX-208) REDUCES ACE2 PROTEIN ABUNDANCE AND PREVENTS SARS-COV-2 SPIKE PROTEIN BINDING TO HUMAN LUNG CELLS, A MOA THAT COULD ATTENUATE VIRAL ENTRY	Fu, L; Gilham, D; Tsujikawa, L; Rakai, BD; Wasiak, S; Stotz, S; Sarsons, CD; Sweeney, M; Johansson, J; Wong, N; Kulikowski, E	JOURNAL OF THE AMERICAN COLLEGE OF CARDIOLOGY	2021	Record concerns coronaviruses but describes neither a novel nor an attenuated coronavirus
28758349	10.1111/tbed.12681	Appearance of US-like porcine epidemic diarrhoea virus (PEDV) strains before US outbreaks and genetic heterogeneity of PEDVs collected in Northern Vietnam during 2012–2015	Diep N.V., Sueyoshi M., Izzati U., Fuke N., Teh A.P.P., Lan N.T., Yamaguchi R.	Transboundary and Emerging Diseases	2018	Record describes a novel non-attenuated coronavirus
17576016	10.1016/j.jviromet.2007.05.012	Application of a focus formation assay for detection and titration of porcine epidemic diarrhea virus	Cruz D.J.M., Shin H.-J.	Journal of Virological Methods	2007	Record concerns coronaviruses but describes neither a novel nor an attenuated coronavirus
23901767	10.1637/10334-082712-Reg.1	Application of a new Bivalent Marek's disease vaccine does not interfere with infectious bronchitis or newcastle disease vaccinations and proves efficacious	Rahaus M., Augustinski K., Castells M., Desloges N.	Avian Diseases	2013	PASS	The sequence of coronavirus described by the record is not known
33147850	10.3390/molecules25215091	Application of Humanized Zebrafish Model in the Suppression of SARS-CoV-2 Spike Protein Induced Pathology by Tri-Herbal Medicine Coronil via Cytokine Modulation	Balkrishna A., Solleti S.K., Verma S., Varshney A.	Molecules (Basel, Switzerland)	2020	Record concerns coronaviruses but describes neither a novel nor an attenuated coronavirus
	10.15722/jds.14.6.201606.89	Applications of SMCRE model on social amplification of MERS risk information and its implications	Choi C.-I., Bae S.-K., Kim C.-M.	Journal of Distribution Science	2016	Record concerns coronaviruses but describes neither a novel nor an attenuated coronavirus
	10.1016/j.japr.2021.100153	Applied Research Note: Alpha-monolaurin stimulates the antibody response elicited upon infectious bronchitis vaccination of broilers	De Gussem M., Dedeurwaerder A., Christiaens I., Damen E.P.C.W., Dansen O.	Journal of Applied Poultry Research	2021	PASS	The sequence of coronavirus described by the record is not known
	10.1038/s41541-020-0204-7	Applying lessons from the Ebola vaccine experience for SARS-CoV-2 and other epidemic pathogens	Wolf J., Bruno S., Eichberg M., Jannat R., Rudo S., VanRheenen S., Coller B.-A.	npj Vaccines	2020	Record is a review on coronavirus attenuation
	10.1007/s40203-020-00058-7	Are losartan and imatinib effective against SARS-CoV2 pathogenesis? A pathophysiologic-based in silico study	Nejat R., Sadr A.S.	In Silico Pharmacology (2021) 9:1 Article Number: 1. Date of Publication: 1 Dec 2021	2021	Record concerns coronaviruses but describes neither a novel nor an attenuated coronavirus
33007615	10.1016/j.bios.2020.112643	Array-based analysis of SARS-CoV-2, other coronaviruses, and influenza antibodies in convalescent COVID-19 patients	Steiner DJ, Cognetti JS, Luta EP, Klose AM, Bucukovski J, Bryan MR, Schmuke JJ, Nguyen-Contant P, Sangster MY, Topham DJ, Miller BL.	Biosens Bioelectron	2020	Record concerns coronaviruses but describes neither a novel nor an attenuated coronavirus
9094669	10.1128/jvi.71.5.3922-3931.1997	Assembled coronavirus from complementation of two defective interfering RNAs	Kim K.H., Narayanan K., Makino S.	Journal of Virology	1997	Record describes a coronavirus that cannot replicate
16731004	10.1016/j.biologicals.2006.02.001	Assembly of pseudorabies virus genome-based transfer vehicle carrying major antigen sites of S gene of transmissible gastroenteritis virus: Potential perspective for developing live vector vaccines	Yin J., Ren X., Tian Z., Li Y.	Biologicals	2007	Record concerns coronaviruses but describes neither a novel nor an attenuated coronavirus
34056088	10.1021/acscentsci.1c00058	Assessing Antigen Structural Integrity through Glycosylation Analysis of the SARS-CoV-2 Viral Spike	Brun, J; Vasiljevic, S; Gangadharan, B; Hensen, M; Chandran, AV; Hill, ML; Kiappes, JL; Dwek, RA; Alonzi, DS; Struwe, WB; Zitzmann, N	ACS CENTRAL SCIENCE	2021	Record concerns coronaviruses but describes neither a novel nor an attenuated coronavirus
35054372	10.3390/diagnostics12010205	Assessing SARS-CoV-2 Neutralizing Antibodies after BNT162b2 Vaccination and Their Correlation with SARS-CoV-2 IgG Anti-S1, Anti-RBD and Anti-S2 Serological Titers	Ramos A, Cardoso MJ, Ribeiro L, Guimarães JT.	Diagnostics (Basel)	2022	Record concerns coronaviruses but describes neither a novel nor an attenuated coronavirus
32611537	10.1016/j.bj.2020.06.003	Assessing the application of a pseudovirus system for emerging SARS-CoV-2 and re-emerging avian influenza virus H5 subtypes in vaccine development	Huang SW, Tai CH, Hsu YM, Cheng D, Hung SJ, Chai KM, Wang YF, Wang JR.	Biomed J	2020	Record concerns coronaviruses but describes neither a novel nor an attenuated coronavirus
27044167	10.20506/rst.34.3.2411	Assessing the economic burden of avian infectious bronchitis on poultry farms in Brazil	Colvero L.P., Villarreal L.Y.B., Torres C.A., Brandão P.E.	OIE Revue Scientifique et Technique	2015	Record is a review on coronavirus attenuation
35087051	10.1038/s41467-022-28170-6	Assessing the impact of SARS-CoV-2 prevention measures in Austrian schools using agent-based simulations and cluster tracing data	Lasser J, Sorger J, Richter L, Thurner S, Schmid D, Klimek P.	Nat Commun	2022	Record concerns coronaviruses but describes neither a novel nor an attenuated coronavirus
33930563	10.1016/j.meegid.2021.104884	Assessment of basic reproduction number (R(0)), spatial and temporal epidemiological determinants, and genetic characterization of SARS-CoV-2 in Bangladesh	Islam A, Sayeed MA, Rahman MK, Zamil S, Abedin J, Saha O, Hassan MM.	Infect Genet Evol	2021	Record concerns coronaviruses but describes neither a novel nor an attenuated coronavirus
	10.1080/03079458008418401	Assessment of cross-immunity in chickens to strains of avian infectious bronchitis virus using tracheal organ cultures	Darbyshire J.H.	Avian Pathology	1980	The sequence of coronavirus described by the record is not known
28895517	10.1099/jgv.0.000893	Assessment of molecular and genetic evolution, antigenicity and virulence properties during the persistence of the infectious bronchitis virus in broiler breeders	Fernando F.S., Kasmanas T.C., Lopes P.D., Montassier M.F.S., Mores M.A.Z., Mariguela V.C., Pavani C., dos Santos R.M., Assayag M.S., Jr., Montassier H.J.	Journal of General Virology	2017	PASS	The sequence of coronavirus described by the record is not known
29451010	10.1080/03079457.2018.1440064	Assessment of Mycoplasma gallisepticum vaccine efficacy in a co-infection challenge model with QX-like infectious bronchitis virus	Bwala D.G., Solomon P., Duncan N., Wandrag D.B.R., Abolnik C.	Avian Pathology	2018	Record concerns coronaviruses but describes neither a novel nor an attenuated coronavirus
27277076	10.1186/s12917-016-0711-y	Assessment of pathogenicity and tissue distribution of infectious bronchitis virus strains (Italy 02 genotype) isolated from moroccan broiler chickens	Khataby K, Kichou F, Loutfi C, Ennaji MM.	BMC Vet Res	2016	Record concerns coronaviruses but describes neither a novel nor an attenuated coronavirus
33249450	10.1093/cid/ciaa1784	Assessment of Risks Associated With Severe Acute Respiratory Syndrome Coronavirus 2 Experimental Human Infection Studies	Kuiper VP, Rosendaal FR, Kamerling IMC, Visser LG, Roestenberg M.	Clin Infect Dis	2021	Record concerns coronaviruses but describes neither a novel nor an attenuated coronavirus
	10.3969/j.issn.1001-8360.2011.09.002	Assessment of SARS influence on railway passenger traffic volume based on SA bottom line	Gui W.-L., Han Z.-Z.	Tiedao Xuebao/Journal of the China Railway Society	2011	Record concerns coronaviruses but describes neither a novel nor an attenuated coronavirus
34975908	10.3389/fimmu.2021.797919	Assessment of SARS-CoV-2 Immunity in Convalescent Children and Adolescents	Tsang HW, Chua GT, To KKW, Wong JSC, Tu W, Kwok JSY, Wong WHS, Wang X, Zhang Y, Rosa Duque JS, Chan GCF, Chu WK, Pang CP, Tam PKH, Lau YL, Wong ICK, Leung WH, Yuen KY, Kwan MYW, Ip P.	Front Immunol	2021	Record concerns coronaviruses but describes neither a novel nor an attenuated coronavirus
		Assessment of the Impact of Confinement by SARS-CoV-2 on the Body Composition of Elite Soccer Players	Berral-Aguilar, AJ; Mendez-Rebolledo, G; Rojano-Ortega, D; Moya-Amaya, H; Molina-Lopez, A; Berral-De-la-Rosa, FJ	INTERNATIONAL JOURNAL OF MORPHOLOGY	2021	Record concerns coronaviruses but describes neither a novel nor an attenuated coronavirus
24673141	10.1111/avj.12156	Assessment of the potential relationship between egg quality and infectious bronchitis virus infection in Australian layer flocks	Hewson K.A., Robertson T., Steer P.A., Devlin J.M., Noormohammadi A.H., Ignjatovic J.	Australian Veterinary Journal	2014	Record concerns coronaviruses but describes neither a novel nor an attenuated coronavirus
30955799	10.1016/j.vetmic.2019.03.009	Assessment of the safety and efficacy of an attenuated live vaccine based on highly virulent genotype 2b porcine epidemic diarrhea virus in nursing piglets	Jang G., Won H., Lee D.-U., Noh Y.-H., Lee S.-C., Choi H.-W., Yoon I.-J., Lee Y.J., Sang Yoo H., Lee C.	Veterinary Microbiology	2019	Record describes coronavirus attenuation method that cannot be applied to SARS-CoV-2
33097081	10.1186/s12985-020-01433-8	Assessments of different inactivating reagents in formulating transmissible gastroenteritis virus vaccine	Zhao F, Liu L, Xu M, Shu X, Zheng L, Wei Z.	Virol J	2020	Record concerns coronaviruses but describes neither a novel nor an attenuated coronavirus
	10.1007/s13337-021-00742-y	Associated pathogenesis of bladder cancer and SARS-CoV-2 infection: a treatment strategy	Singh M.K., Jain M., Shyam H., Shankar P., Singh V.	VirusDisease	2021	Record concerns coronaviruses but describes neither a novel nor an attenuated coronavirus
3002010		Associated vaccination of poultry against infectious bronchitis, Newcastle disease and infectious bursitis	Cholakova R.	Veterinarno-meditsinski nauki	1985	The sequence of coronavirus described by the record is not known
3002010		Associated vaccination of poultry against infectious bronchitis, Newcastle disease and infectious bursitis [Asotsiirana vaksinatsiia na ptitsi protiv zarazen bronkhit, psevdochuma i zarazen burzit.]	Cholakova R.	Veterinarno-meditsinski nauki	1985	The sequence of coronavirus described by the record is not known
34962505	10.1001/jamainternmed.2021.7024	Association Between Immune Dysfunction and COVID-19 Breakthrough Infection After SARS-CoV-2 Vaccination in the US	Sun J, Zheng Q, Madhira V, Olex AL, Anzalone AJ, Vinson A, Singh JA, French E, Abraham AG, Mathew J, Safdar N, Agarwal G, Fitzgerald KC, Singh N, Topaloglu U, Chute CG, Mannon RB, Kirk GD, Patel RC; National COVID Cohort Collaborative (N3C) Consortium.	JAMA Intern Med	2022	Record concerns coronaviruses but describes neither a novel nor an attenuated coronavirus
17045921	10.1016/j.freeradbiomed.2006.08.011	Association between nitric oxide synthesis and vaccination-acquired resistance to murine hepatitis virus by spf mice	Tsuhako MH, Augusto O, Linares E, Dagli ML, Pereira CA.	Free Radic Biol Med	2006	Record concerns coronaviruses but describes neither a novel nor an attenuated coronavirus
34757387	10.1001/jamapediatrics.2021.4897	Association of Human Milk Antibody Induction, Persistence, and Neutralizing Capacity With SARS-CoV-2 Infection vs mRNA Vaccination	Young BE, Seppo AE, Diaz N, Rosen-Carole C, Nowak-Wegrzyn A, Cruz Vasquez JM, Ferri-Huerta R, Nguyen-Contant P, Fitzgerald T, Sangster MY, Topham DJ, Järvinen KM.	JAMA Pediatr	2021	Record concerns coronaviruses but describes neither a novel nor an attenuated coronavirus
32442285	10.1093/cid/ciaa624	Association of Renin-angiotensin-aldosterone System Inhibitors with Coronavirus Disease 2019 (COVID-19)-Related Outcomes in Korea: A Nationwide Population-based Cohort Study	Jung S.-Y., Choi J.C., You S.-H., Kim W.-Y.	Clinical Infectious Diseases	2020	Record concerns coronaviruses but describes neither a novel nor an attenuated coronavirus
32293018		At least 68 vaccine candidates under development [Minst ett 70-tal möjliga vacciner mot sars-cov-2 är nu på gång]	Leach S.	Lakartidningen	2020	Record is a review on coronavirus attenuation
18334542	10.1189/jlb.0607390	Atherogenic diet-induced hepatitis is partially dependent on murine TLR4	Desai M.S., Mariscalco M.M., Tawil A., Vallejo J.G., Smith C.W.	Journal of Leukocyte Biology	2008	Record concerns coronaviruses but describes neither a novel nor an attenuated coronavirus
2850601	10.1016/S0034-5288(18)30970-6	Attempted immunisation of cats against feline infectious peritonitis using canine coronavirus	Stoddart CA, Barlough JE, Baldwin CA, Scott FW.	Res Vet Sci	1988	Record describes a novel non-attenuated coronavirus
6299143		Attempted immunization of cats against feline infectious peritonitis, using avirulent live virus or sublethal amounts of virulent virus.	Pedersen N.C., Black J.W.	American Journal of Veterinary Research	1983	PASS	Report not retrieved
9055969		Attempted immunization of cats with feline infectious peritonitis virus propagated at reduced temperatures	Baldwin C.W., Scott F.W.	American Journal of Veterinary Research	1997	PASS	Report not retrieved
696074		Attempts to develop an immunoprophylaxis against transmissible gastroenteritis (TGE) in pigs. III. Passive immune transfer after oral vaccination with the attenuated TGE virus strain B1	Hess R.G., Bachmann P.A., Mayr A.	Zentralblatt fur Veterinarmedizin - Reihe B	1978	Report not retrieved
696074		ATTEMPTS TO DEVELOP AN IMMUNOPROPHYLAXIS AGAINST TRANSMISSIBLE GASTROENTERITIS(TGE) IN PIGS .3. PASSIVE IMMUNE TRANSFER AFTER ORAL VACCINATION WITH ATTENUATED TGE VIRUS STRAIN-BL	HESS, RG; BACHMANN, PA; MAYR, A	ZENTRALBLATT FUR VETERINARMEDIZIN REIHE B-JOURNAL OF VETERINARY MEDICINE SERIES B-INFECTIOUS DISEASES IMMUNOLOGY FOOD HYGIENE VETERINARY PUBLIC HEALTH	1978	PASS	Report not retrieved
34449440	10.1172/JCI148036	Attenuated activation of pulmonary immune cells in mRNA-1273-vaccinated hamsters after SARS-CoV-2 infection	Meyer M., Wang Y., Edwards D., Smith G.R., Rubenstein A.B., Ramanathan P., Mire C.E., Pietzsch C., Chen X., Ge Y., Cheng W.S., Henry C., Woods A., Ma L., Stewart-Jones G.B.E., Bock K.W., Minai M., Nagata B.M., Periasamy S., Shi P.-Y., Graham B.S., Moore I.N., Ramos I., Troyanskaya O.G., Zaslavsky E., Carfi A., Sealfon S.C., Bukreyev A.	Journal of Clinical Investigation	2021	Record concerns coronaviruses but describes neither a novel nor an attenuated coronavirus
34920024	10.1016/j.jinf.2021.12.006	Attenuated anti-SARS-CoV-2 antibody response to vaccination in patients with rheumatic diseases	Manolache N.G., Ursachi V., Scohy A., Desmet C., Yombi J.C., Toukap A.N., Stoenoiu M.S.	The Journal of infection	2021	Record concerns coronaviruses but describes neither a novel nor an attenuated coronavirus
35104835	10.1038/s41586-022-04462-1	Attenuated fusogenicity and pathogenicity of SARS-CoV-2 Omicron variant	Suzuki R., Yamasoba D., Kimura I., Wang L., Kishimoto M., Ito J., Morioka Y., Nao N., Nasser H., Uriu K., Kosugi Y., Tsuda M., Orba Y., Sasaki M., Shimizu R., Kawabata R., Yoshimatsu K., Asakura H., Nagashima M., Sadamasu K., Yoshimura K., Sawa H., Ikeda T., Irie T., Matsuno K., Tanaka S., Fukuhara T., Sato K.	Nature	2022	PASS	PASS
	10.1002/ajh.26373	Attenuated humoral immune response following anti-SARS-CoV-2 vaccine in heavily pretreated patients with multiple myeloma and AL amyloidosis	Schiller Salton N., Szwarcwort M., Tzoran I., Horowitz N.A., Zuckerman T., Horesh N., Shachor-Meyouhas Y., Hussein K., Lavi N.	American Journal of Hematology	2021	Record concerns coronaviruses but describes neither a novel nor an attenuated coronavirus
32899480	10.3390/v12090987	Attenuated Influenza Virions Expressing the SARS-CoV-2 Receptor-Binding Domain Induce Neutralizing Antibodies in Mice	Loes A.N., Gentles L.E., Greaney A.J., Crawford K.H.D., Bloom J.D.	Viruses	2020	Record concerns coronaviruses but describes neither a novel nor an attenuated coronavirus
32563187	10.1093/infdis/jiaa356	Attenuated interferon and proinflammatory response in SARS-CoV-2-infected human dendritic cells is associated with viral antagonism of STAT1 phosphorylation	Yang D., Chu H., Hou Y., Chai Y., Shuai H., Lee A.C.-Y., Zhang X., Wang Y., Hu B., Huang X., Yuen T.T.-T., Cai J.-P., Zhou J., Yuan S., Zhang A.J., Chan J.F.-W., Yuen K.-Y.	Journal of Infectious Diseases	2020	Record concerns coronaviruses but describes neither a novel nor an attenuated coronavirus
31822427	10.1016/j.vaccine.2019.11.064	Attenuated live infectious bronchitis virus QX vaccine disseminates slowly to target organs distant from the site of inoculation	Laconi A., Weerts E.A.W.S., Bloodgood J.C.G., Deniz Marrero J.P., Berends A.J., Cocciolo G., de Wit J.J., Verheije M.H.	Vaccine	2020	The sequence of coronavirus described by the record is not known
21539870	10.1016/j.virusres.2011.04.006	Attenuated live vaccine usage affects accurate measures of virus diversity and mutation rates in avian coronavirus infectious bronchitis virus	McKinley E.T., Jackwood M.W., Hilt D.A., Kissinger J.C., Robertson J.S., Lemke C., Paterson A.H.	Virus Research	2011	Record describes a novel non-attenuated coronavirus
21576342	10.1128/IAI.05099-11	Attenuated nephritis in inducible nitric oxide synthase knockout C57BL/6 mice and pulmonary hemorrhage in CB17 scid and recombination activating gene 1 knockout C57BL/6 mice infected with Leptospira interrogans	Bandeira M., Santos C.S., de Azevedo E.C., Soares L.M., Macedo J.O., Marchi S., da Silva C.L.R., Chagas-Junior A.D., McBride A.J.A., McBride F.W.C., Reis M.G., Athanazio D.A.	Infection and Immunity	2011	Record does not concern coronaviruses
32727701	10.1016/j.clml.2020.06.014	Attenuated Novel SARS Coronavirus 2 Infection in an Allogeneic Hematopoietic Stem Cell Transplant Patient on Ruxolitinib	Foss F.M., Rubinowitz A., Landry M.L., Isufi I., Gowda L., Seropian S., Perreault S., Shenoi S.V.	Clinical Lymphoma, Myeloma and Leukemia	2020	Record concerns coronaviruses but describes neither a novel nor an attenuated coronavirus
32135175	10.1016/j.jviromet.2020.113842	Attenuated porcine-derived type 2 bovine viral diarrhea virus as vector stably expressing viral gene	Tao J., Li B., Shi Y., Chen J., Zhu G., Shen X., Liu H.	Journal of Virological Methods	2020	Record does not concern coronaviruses
	10.1038/s41586-022-04442-5	Attenuated replication and pathogenicity of SARS-CoV-2 B.1.1.529 Omicron	Shuai H., Chan J.F.-W., Hu B., Chai Y., Yuen T.T.-T., Yin F., Huang X., Yoon C., Hu J.-C., Liu H., Shi J., Liu Y., Zhu T., Zhang J., Hou Y., Wang Y., Lu L., Cai J.-P., Zhang A.J., Zhou J., Yuan S., Brindley M.A., Zhang B.-Z., Huang J.-D., To K.K.-W., Yuen K.-Y., Chu H.	Nature	2022	PASS	PASS
35039324	10.1136/annrheumdis-2021-221641	Attenuated response to fourth dose SARS-CoV-2 vaccination in patients with autoimmune disease: a case series	Teles, M; Connolly, CM; Frey, S; Chiang, TPY; Alejo, JJ; Boyarsky, BJ; Shah, AA; Albayda, J; Christopher-Stine, L; Werbel, WA; Segev, DL; Paik, JJ	ANNALS OF THE RHEUMATIC DISEASES		Record concerns coronaviruses but describes neither a novel nor an attenuated coronavirus
34895486	10.1016/j.ccell.2021.12.003	Attenuated response to SARS-CoV-2 vaccine in patients with asymptomatic precursor stages of multiple myeloma and Waldenstrom macroglobulinemia	Konishi Y., Sklavenitis-Pistofidis R., Yue H., Ferrari F., Redd R.A., Lightbody E.D., Russo M., Perry J., Horowitz E., Justis A.V., Shayegh N.A., Savell A., Prescott J., Varmeh S., Nowak R.P., Hamilton M., Auclair D., Marinac C.R., Trippa L., Fischer E.S., Ghobrial I.M.	Cancer Cell	2022	Record concerns coronaviruses but describes neither a novel nor an attenuated coronavirus
32301390	10.1080/22221751.2020.1756700	Attenuated SARS-CoV-2 variants with deletions at the S1/S2 junction	Lau S.-Y., Wang P., Mok B.W.-Y., Zhang A.J., Chu H., Lee A.C.-Y., Deng S., Chen P., Chan K.-H., Song W., Chen Z., To K.K.-W., Chan J.F.-W., Yuen K.-Y., Chen H.	Emerging Microbes and Infections	2020	PASS	PASS
32964056	10.1155/2020/2837670	Attenuated subcomponent vaccine design targeting the SARS-CoV-2 nucleocapsid phosphoprotein RNA binding domain: In silico analysis	Chukwudozie O.S., Chukwuanukwu R.C., Iroanya O.O., Eze D.M., Duru V.C., Dele-Alimi T.O., Kehinde B.D., Bankole T.T., Obi P.C., Okinedo E.U.	Journal of Immunology Research	2020	Record concerns coronaviruses but describes neither a novel nor an attenuated coronavirus
3027956		Attenuated vaccine against rota- and coronavirus enteritis in calves	Kharalambiev K.E., Mitov B., Georgiev G.K., Sizov I., Simeonov S.	Veterinarno-meditsinski nauki	1986	Report not retrieved
3027956		Attenuated vaccine against rota- and coronavirus enteritis in calves [Atenuirana vaksina sreshtu rota- i koronavirusnite enteriti po teletata.]	Kharalambiev K.E., Mitov B., Georgiev G.K., Sizov I., Simeonov S.	Veterinarno-meditsinski nauki	1986	PASS	Report not retrieved
27328755	10.1038/srep28556	Attenuated viral hepatitis in Trem1-/- mice is associated with reduced inflammatory activity of neutrophils	Kozik J.-H., Trautmann T., Carambia A., Preti M., Lütgehetmann M., Krech T., Wiegard C., Heeren J., Herkel J.	Scientific Reports	2016	Record does not concern coronaviruses
	10.1038/s41392-021-00786-y	Attenuating innate immunity and facilitating β-coronavirus infection by NSP1 of SARS-CoV-2 through specific redistributing hnRNP A2/B1 cellular localization	Zhou F., Wan Q., Chen S., Chen Y., Wang P.-H., Yao X., He M.-L.	Signal Transduction and Targeted Therapy	2021	PASS	Record concerns coronaviruses but describes neither a novel nor an attenuated coronavirus
31802683	10.4149/av_2019_404	Attenuation and amino acid changes in infectious bronchitis virus Iranian 793/B serotype during serial passaging in embryonated chicken eggs	Salarpour A., Toroghi R., Nikbakht G.R., Rezai A., Momayez R.	Acta Virologica	2019	PASS	The sequence of coronavirus described by the record is not known
31767069	10.1016/j.vetmic.2019.108489	Attenuation and characterization of porcine enteric alphacoronavirus strain GDS04 via serial cell passage	Xu Z., Lin Y., Zou C., Peng P., Wu Y., Wei Y., Liu Y., Gong L., Cao Y., Xue C.	Veterinary Microbiology	2019	PASS	Record describes coronavirus attenuation method that cannot be applied to SARS-CoV-2
24478444	10.1128/JVI.03571-13	Attenuation and restoration of severe acute respiratory syndrome coronavirus mutant lacking 2'-o-methyltransferase activity	Menachery V.D., Yount B.L., Josset L., Gralinski L.E., Scobey T., Agnihothram S., Katze M.G., Baric R.S.	Journal of Virology	2014	PASS	PASS
26611202	10.1016/j.vaccine.2015.11.008	Attenuation mechanism of virulent infectious bronchitis virus strain with QX genotype by continuous passage in chicken embryos	Huo Y.-F., Huang Q.-H., Lu M., Wu J.-Q., Lin S.-Q., Zhu F., Zhang X.-M., Huang Y.-Y., Yang S.-H., Xu C.-T.	Vaccine	2016	PASS	Record describes coronavirus attenuation method that cannot be applied to SARS-CoV-2
31580972	10.1016/j.virol.2019.09.009	Attenuation of a virulent swine acute diarrhea syndrome coronavirus strain via cell culture passage	Sun Y., Cheng J., Luo Y., Yan X.L., Wu Z.X., He L.L., Tan Y.R., Zhou Z.H., Li Q.N., Zhou L., Wu R.T., Lan T., Ma J.Y.	Virology	2019	Record describes coronavirus attenuation method that cannot be applied to SARS-CoV-2
28284624	10.1016/j.vetmic.2017.01.015	Attenuation of an original US porcine epidemic diarrhea virus strain PC22A via serial cell culture passage	Lin C.-M., Hou Y., Marthaler D.G., Gao X., Liu X., Zheng L., Saif L.J., Wang Q.	Veterinary Microbiology	2017	PASS	Record describes coronavirus attenuation method that cannot be applied to SARS-CoV-2
		Attenuation of antibody response to sars-cov-2 in a patient on ocrelizumab	Conte, W	MULTIPLE SCLEROSIS JOURNAL	2020	Record concerns coronaviruses but describes neither a novel nor an attenuated coronavirus
32593144	10.1016/j.msard.2020.102315	Attenuation of antibody response to SARS-CoV-2 in a patient on ocrelizumab with hypogammaglobulinemia	Conte W.L.	Multiple Sclerosis and Related Disorders	2020	Record concerns coronaviruses but describes neither a novel nor an attenuated coronavirus
34000684	10.1016/j.msard.2021.103014	Attenuation of antibody response to SARS-CoV-2 infection in patients with multiple sclerosis on ocrelizumab: A case-control study	Conte W.L.	Multiple Sclerosis and Related Disorders	2021	Record concerns coronaviruses but describes neither a novel nor an attenuated coronavirus
1664720	10.2307/1591619	Attenuation of avian infectious bronchitis virus by cold-adaptation.	Gelb Jr. J., Lunt R.L., Metz A.L., Fries P.A.	Avian diseases	1991	PASS	The sequence of coronavirus described by the record is not known
34170074	10.15252/emmm.202114122	Attenuation of clinical and immunological outcomes during SARS-CoV-2 infection by ivermectin	de Melo G.D., Lazarini F., Larrous F., Feige L., Kornobis E., Levallois S., Marchio A., Kergoat L., Hardy D., Cokelaer T., Pineau P., Lecuit M., Lledo P.-M., Changeux J.-P., Bourhy H.	EMBO Molecular Medicine	2021	Record concerns coronaviruses but describes neither a novel nor an attenuated coronavirus
		Attenuation of Experimental Autoimmune Hepatitis in Mice with Bone Mesenchymal Stem Cell-Derived Exosomes Carrying Microrna-223	Chen, YP; Lu, FB	HEPATOLOGY	2018	Record does not concern coronaviruses
31043525	10.1128/JVI.00492-19	Attenuation of Infectious Bronchitis Virus in Eggs Results in Different Patterns of Genomic Variation across Multiple Replicates	Oade M.S., Keep S., Freimanis G.L., Orton R.J., Britton P., Hammond J.A., Bickerton E.	Journal of virology	2019	PASS	Record describes coronavirus attenuation method that cannot be applied to SARS-CoV-2
23593419	10.1371/journal.pone.0061166	Attenuation of Mouse Hepatitis Virus by Deletion of the LLRKxGxKG Region of Nsp1	Lei L., Ying S., Baojun L., Yi Y., Xiang H., Wenli S., Zounan S., Deyin G., Qingyu Z., Jingmei L., Guohui C.	PLoS ONE	2013	Record describes coronavirus attenuation method that cannot be applied to SARS-CoV-2
2997991	10.1016/0042-6822(85)90345-9	Attenuation of murine coronavirus infection by ammonium chloride	Mizzen L., Hilton A., Cheley S., Anderson R.	Virology	1985	Record concerns coronaviruses but describes neither a novel nor an attenuated coronavirus
33797313	10.1080/21505594.2021.1908742	Attenuation of porcine deltacoronavirus disease severity by porcine reproductive and respiratory syndrome virus coinfection in a weaning pig model	Zhou X., Ge X., Zhang Y., Han J., Guo X., Chen Y., Zhou L., Yang H.	Virulence	2021	Record concerns coronaviruses but describes neither a novel nor an attenuated coronavirus
30310104	10.1038/s41598-018-33487-8	Attenuation of replication by a 29 nucleotide deletion in SARS-coronavirus acquired during the early stages of human-to-human transmission	Muth D., Corman V.M., Roth H., Binger T., Dijkman R., Gottula L.T., Gloza-Rausch F., Balboni A., Battilani M., Rihtarič D., Toplak I., Ameneiros R.S., Pfeifer A., Thiel V., Drexler J.F., Müller M.A., Drosten C.	Scientific Reports	2018	PASS	Record does not describe an in vivo study
15183056	10.1016/j.virol.2004.03.031	Attenuation of SARS coronavirus by a short hairpin RNA expression plasmid targeting RNA-dependent RNA polymerase	Lu A., Zhang H., Zhang X., Wang H., Hu Q., Shen L., Schaffhausen B.S., Hou W., Li L.	Virology	2004	Record concerns coronaviruses but describes neither a novel nor an attenuated coronavirus
35106453	10.1016/j.isci.2022.103818	Attenuation of SARS-CoV-2 infection by losartan in human kidney organoids	Rahmani W, Chung H, Sinha S, Bui-Marinos MP, Arora R, Jaffer A, Corcoran JA, Biernaskie J, Chun J.	iScience	2022	Record concerns coronaviruses but describes neither a novel nor an attenuated coronavirus
29496346	10.1016/j.vaccine.2018.02.053	Attenuation, safety, and efficacy of a QX-like infectious bronchitis virus serotype vaccine	Yan S., Zhao J., Xie D., Huang X., Cheng J., Guo Y., Liu C., Ma Z., Yang H., Zhang G.	Vaccine	2018	PASS	The sequence of coronavirus described by the record is not known
14562890	10.1637/6094	Attenuation, safety, and efficacy of an infectious bronchitis virus GA98 serotype vaccine	Jackwood M.W., Hilt D.A., Brown T.P.	Avian Diseases	2003	PASS	The sequence of coronavirus described by the record is not known
6264556	10.1016/s0034-5288(18)32611-0	Australian infectious bronchitis viruses: Identification of nine subtypes by a neutralisation test	Wadey C.N., Faragher J.T.	Research in Veterinary Science	1981	Record concerns coronaviruses but describes neither a novel nor an attenuated coronavirus
21635973	10.1016/j.intimp.2011.05.020	Autoimmune hepatitis-like disease in C57BL/6 mice infected with mouse hepatitis virus A59	Aparicio JL, Peña C, Retegui LA.	Int Immunopharmacol	2011	Record concerns coronaviruses but describes neither a novel nor an attenuated coronavirus
		Autonomic nervous mechanisms of the cardiovascular (COV) effects of delta-9-tetrahydrocannabinol (THC) in man	Benowitz N.L., Rosenberg J., Rogers W., Jones R.T.	Federation Proceedings	1978	Record does not concern coronaviruses
	10.26873/SVR-1432-2021	AVIAN CORONAVIRUS in EGYPT: EPIDEMIOLOGICAL ACUITIES and PATHO-GENICITY in COMMERCIAL BROILER CHICKENS	Mahmoud A.M., ElBakrey R.M., Mansour S.M.G., Eid A.A.M.	Slovenian Veterinary Research	2021	Record describes a novel non-attenuated coronavirus
31238731	10.1556/004.2019.020	Avian coronavirus infection induces mannose-binding lectin production in dendritic cell precursors of chicken lymphoid organs	Farsang A., Bódi I., Fölker O., Minkó K., Benyeda Z., Bálint Á., Oláh I.	Acta Veterinaria Hungarica	2019	Record describes coronavirus attenuation method that cannot be applied to SARS-CoV-2
18262691	10.1016/j.vaccine.2008.01.006	Avian coronavirus infectious bronchitis attenuated live vaccines undergo selection of subpopulations and mutations following vaccination	McKinley E.T., Hilt D.A., Jackwood M.W.	Vaccine	2008	PASS	The sequence of coronavirus described by the record is not known
22903606	10.1007/s00239-012-9515-2	Avian coronavirus spike glycoprotein ectodomain shows a low codon adaptation to Gallus gallus with virus-exclusive codons in strategic amino acids positions	Brandão P.E.	Journal of Molecular Evolution	2012	Record deals with coronavirus attenuation in only theoretical aspects
	10.1016/B978-0-12-819400-3.00033-8	Avian coronavirus: Case of infectious bronchitis virus pathogenesis, diagnostic approaches, and phylogenetic relationship among emerging strains in middle east and North Africa regions	Khataby K., Kasmi Y., Souiri A., Loutfi C., Ennaji M.M.	Emerging and Reemerging Viral Pathogens: Volume 1: Fundamental and Basic Virology Aspects of Human, Animal and Plant Pathogens	2019	Record is a review on coronavirus attenuation
23155012	10.3382/ps.2012-02476	Avian infectious bronchitis and deep pectoral myopathy - A case control study	Almeida D.O., Tortelly R., Nascimento E.R., Chagas M.A., Khan M.I., Pereira V.L.A.	Poultry Science	2012	The sequence of coronavirus described by the record is not known
20707223		Avian infectious bronchitis disease in Tunisia: seroprevalence, pathogenicity and compatibility studies of vaccine-field isolates [La bronchite infectieuse aviaire en Tunisie: séroprévalence, pathogénicité et étude de compatibilité vaccin-isolats.]	Bourogaa H., Miled K., Larbi I., Nsiri J., Gribaa L., El Behi I., Ben Rhouma W., Allagui E., Sassi H., Ghram A.	Archives de l'Institut Pasteur de Tunis	2009	The sequence of coronavirus described by the record is not known
35044133	10.1637/aviandiseases-21-00098	Avian Infectious Bronchitis in China: Epidemiology, Vaccination, and Control	Zhang X, Guo M, Zhao J, Wu Y.	Avian Dis	2021	Record is a review on coronavirus attenuation
6254487	10.2307/1589702	Avian infectious bronchitis in specific-pathogen-free chickens: quantitation of serum immunoglobulins by electroimmunoassay.	Gillette K.G.	Avian diseases	1980	Record concerns coronaviruses but describes neither a novel nor an attenuated coronavirus
15666874	10.1637/7192-040808R1	Avian infectious bronchitis virus: A possible cause of reduced fertility in the rooster	Boltz D.A., Nakai M., Bahr J.M.	Avian Diseases	2004	PASS	The sequence of coronavirus described by the record is not known
7701859	10.1111/j.1439-0450.1994.tb00252.x	Avian Infectious Bronchitis: Specific Lachrymal IgA Level and Resistance against Challenge	Toro H., Fernandez I.	Journal of Veterinary Medicine, Series B	1994	The sequence of coronavirus described by the record is not known
8713024	10.2307/1592380	Avian infectious bronchitis: Viral persistence in the harderian gland and histological changes after eyedrop vaccination	Toro H., Godoy V., Larenas J., Reyes E., Kaleta E.F.	Avian Diseases	1996	The sequence of coronavirus described by the record is not known
34003114	10.7554/eLife.69496	Avoiding culture shock with the SARS-CoV-2 spike protein	Hale B.G.	eLife	2021	Record is a review on coronavirus attenuation
32477069	10.3389/fncel.2020.00116	Azadirachta indica A. Juss Ameliorates Mouse Hepatitis Virus-Induced Neuroinflammatory Demyelination by Modulating Cell-to-Cell Fusion in an Experimental Animal Model of Multiple Sclerosis	Sarkar L, Putchala RK, Safiriyu AA, Das Sarma J.	Front Cell Neurosci	2020	Record concerns coronaviruses but describes neither a novel nor an attenuated coronavirus
35067959	10.1002/ana.26309	B Cell Depletion and SARS-CoV-2 Vaccine Responses in Neuroimmunologic Patients	Kornek B, Leutmezer F, Rommer PS, Koblischke M, Schneider L, Haslacher H, Thalhammer R, Zimprich F, Zulehner G, Bsteh G, Dal-Bianco A, Rinner W, Zebenholzer K, Wimmer I, Steinmaurer A, Graninger M, Mayer M, Roedl K, Berger T, Winkler S, Aberle JH, Tobudic S.	Ann Neurol	2022	Record concerns coronaviruses but describes neither a novel nor an attenuated coronavirus
31883087	10.1007/978-1-0716-0211-9_5	Bacterial artificial chromosome-based lambda red recombination with the I-Scei homing endonuclease for genetic alteration of MERS-CoV	Fehr A.R.	Methods in Molecular Biology	2020	Record describes a novel non-attenuated coronavirus
31141982	10.3390/vaccines7020046	Bacterial Outer Membrane Vesicles (OMVs)-based Dual Vaccine for Influenza A H1N1 Virus and MERS-CoV	Shehata MM, Mostafa A, Teubner L, Mahmoud SH, Kandeil A, Elshesheny R, Frantz R, La Pietra L, Pleschka S, Osman A, Kayali G, Chakraborty T, Ali MA, Mraheil MA.	Vaccines (Basel)	2019	Record concerns coronaviruses but describes neither a novel nor an attenuated coronavirus
17184168	10.1089/dna.2006.25.668	Baculovirus surface display of SARS coronavirus (SARS-CoV) spike protein and immunogenicity of the displayed protein in mice models	Feng Q., Liu Y., Qu X., Deng H., Ding M., Lau T.L.T., Yu A.C.-H., Chen J.	DNA and Cell Biology	2006	Record concerns coronaviruses but describes neither a novel nor an attenuated coronavirus
	10.3389/fmicb.2020.01156	BALB/c Mouse Is a Potential Animal Model System for Studying Acute and Chronic Genotype 4 Hepatitis E Virus Infection	Li Y., Long F., Yang C., Hao X., Wu J., Situ J., Chen S., Qian Z., Huang F., Yu W.	Frontiers in Microbiology	2020	Record does not concern coronaviruses
	10.3389/fmicb.2021.548275	Base Composition and Host Adaptation of the SARS-CoV-2: Insight From the Codon Usage Perspective	Roy A., Guo F., Singh B., Gupta S., Paul K., Chen X., Sharma N.R., Jaishee N., Irwin D.M., Shen Y.	Frontiers in Microbiology	2021	Record is a review on coronavirus attenuation
34984727	10.1111/1348-0421.12961	Basic reproduction numbers of three strains of mouse hepatitis viruses in mice	Nakayama M, Kyuwa S.	Microbiol Immunol	2022	The sequence of coronavirus described by the record is not known
25211075	10.1016/j.chom.2014.08.009	Bat origins of MERS-CoV supported by bat coronavirus HKU4 usage of human receptor CD26	Wang Q, Qi J, Yuan Y, Xuan Y, Han P, Wan Y, Ji W, Li Y, Wu Y, Wang J, Iwamoto A, Woo PC, Yuen KY, Yan J, Lu G, Gao GF.	Cell Host Microbe	2014	Record concerns coronaviruses but describes neither a novel nor an attenuated coronavirus
	10.1016/j.tmaid.2021.102173	Battle against the pandemic: Emergence of SARS-CoV2 variants and global challenge	Kumar S., Sharma V., Sarkar S., Ludhiadch A.	Travel Medicine and Infectious Disease	2021	Record concerns coronaviruses but describes neither a novel nor an attenuated coronavirus
34549564	10.19191/EP21.4.A001.074	Battling the coronavirus: Treatment and vaccines [Come battere il Coronavirus: Terapie e vaccini]	Levenstein S.	Epidemiologia e Prevenzione	2021	Record is a review on coronavirus attenuation
	10.1016/j.msard.2021.103413	B-cell depleters attenuate the humoral response to SARS-CoV-2 vaccines in multiple sclerosis patients: A case-control study	Conte W.L.	Multiple Sclerosis and Related Disorders	2021	Record concerns coronaviruses but describes neither a novel nor an attenuated coronavirus
15731234	10.1128/JVI.79.6.3401-3408.2005	B-cell responses in patients who have recovered from severe acute respiratory syndrome target a dominant site in the S2 domain of the surface spike glycoprotein	Zhong X, Yang H, Guo ZF, Sin WY, Chen W, Xu J, Fu L, Wu J, Mak CK, Cheng CS, Yang Y, Cao S, Wong TY, Lai ST, Xie Y, Guo Z.	J Virol	2005	Record concerns coronaviruses but describes neither a novel nor an attenuated coronavirus
33538646	10.1080/22221751.2021.1885998	Beneficial effect of combinational methylprednisolone and remdesivir in hamster model of SARS-CoV-2 infection	Ye Z.-W., Yuan S., Chan J.F.-W., Zhang A.J., Yu C.-Y., Ong C.P., Yang D., Chan C.C.-Y., Tang K., Cao J., Poon V.K.-M., Chan C.C.-S., Cai J.-P., Chu H., Yuen K.-Y., Jin D.-Y.	Emerging Microbes and Infections	2021	Record concerns coronaviruses but describes neither a novel nor an attenuated coronavirus
8227310	10.1016/0165-5728(93)90061-3	BETA-ENDORPHIN PROTECTS MICE FROM NEUROLOGICAL DISEASE INDUCED BY THE MURINE CORONAVIRUS MHV-JHM	GILMORE, W; MORADZADEH, DS	JOURNAL OF NEUROIMMUNOLOGY	1993	Record concerns coronaviruses but describes neither a novel nor an attenuated coronavirus
29968338	10.1111/tbed.12945	Better horizontal transmission of a US non-InDel strain compared with a French InDel strain of porcine epidemic diarrhoea virus	Gallien S., Andraud M., Moro A., Lediguerher G., Morin N., Gauger P.C., Bigault L., Paboeuf F., Berri M., Rose N., Grasland B.	Transboundary and Emerging Diseases	2018	Record describes a novel non-attenuated coronavirus
34075371	10.21203/rs.3.rs-555275/v1	Bidirectional genome-wide CRISPR screens reveal host factors regulating SARS-CoV-2, MERS-CoV and seasonal HCoVs	Goujon C, Rebendenne A, Roy P, Bonaventure B, Valadao AC, Desmarets L, Rouillé Y, Tauziet M, Arnaud-Arnould M, Giovannini D, Lee Y, DeWeirdt P, Hegde M, de Gracia FG, McKellar J, Wencker M, Dubuisson J, Belouzard S, Moncorgé O, Doench J.	Res Sq	2021	Record concerns coronaviruses but describes neither a novel nor an attenuated coronavirus
21697468	10.1128/JVI.05112-11	Binding of avian coronavirus spike proteins to host factors reflects virus tropism and pathogenicity	Wickramasinghe I.N.A., de Vries R.P., Gröne A., de Haan C.A.M., Verheije M.H.	Journal of Virology	2011	Record describes coronavirus attenuation method that cannot be applied to SARS-CoV-2
	10.11144/Javeriana.umed62-4.vacu	Bioethical Perspectives about Notion of Mandatory Vaccine for SARS-CoV-2	Galvis, MDP	UNIVERSITAS MEDICA	2021	Record concerns coronaviruses but describes neither a novel nor an attenuated coronavirus
17344285	10.1128/JVI.02361-06	Biologic, antigenic, and full-length genomic characterization of a bovine-like coronavirus isolated from a giraffe	Hasoksuz M., Alekseev K., Vlasova A., Zhang X., Spiro D., Halpin R., Wang S., Ghedin E., Saif L.J.	Journal of Virology	2007	Record describes a novel non-attenuated coronavirus
7852955	10.1002/jmv.1890440207	BIOLOGICAL AND GENETIC-CHARACTERIZATION OF A HEMAGGLUTINATING CORONAVIRUS ISOLATED FROM A DIARRHEIC CHILD	ZHANG, XM; HERBST, W; KOUSOULAS, KG; STORZ, J	JOURNAL OF MEDICAL VIROLOGY	1994	Record describes a novel non-attenuated coronavirus
6329142	10.1007/BF01311222	Biological and macromolecular properties of murine cells persistently infected with MHV-JHM	Leibowitz J.L., Bond C.W., Anderson K., Goss S.	Archives of Virology	1984	Record does not describe an in vivo study
30859476	10.1007/s00705-019-04167-3	Biological characterization and pathogenicity of a newly isolated Chinese highly virulent genotype GIIa porcine epidemic diarrhea virus strain	Zhang L., Liu X., Zhang Q., Zhou P., Fang Y., Dong Z., Zhao D., Li W., Feng J., Zhang Y., Wang Y.	Archives of Virology	2019	Record describes a novel non-attenuated coronavirus
16515044		Biological properties of the chick infectious bronchitis virus isolated in Russia	Batchenko G.V., Bochkov Yu.A., Lugovskaya N.N., Frolov S.V., Drygin V.V., Borisov A.V.	Voprosy Virusologii	2006	Record describes a novel non-attenuated coronavirus
32794723	10.1021/acs.jproteome.0c00410	Biological Rationale for the Repurposing of BCG Vaccine against SARS-CoV-2	Glisic S, Perovic VR, Sencanski M, Paessler S, Veljkovic V.	J Proteome Res	2020	Record concerns coronaviruses but describes neither a novel nor an attenuated coronavirus
8519920	10.1292/jvms.57.781	Biphasic immune responses of cats under controlled infection with a feline enteric coronavirus-79-1683 strain	Kai K, Akagi Y, Soma T, Nomura K, Kanoe M.	J Vet Med Sci	1995	Record concerns coronaviruses but describes neither a novel nor an attenuated coronavirus
33715595	10.1080/07391102.2021.1897679	Black tea bioactives as inhibitors of multiple targets of SARS-CoV-2 (3CLpro, PLpro and RdRp): a virtual screening and molecular dynamic simulation study	Gogoi, M; Borkotoky, M; Borchetia, S; Chowdhury, P; Mahanta, S; Barooah, AK	JOURNAL OF BIOMOLECULAR STRUCTURE & DYNAMICS		Record concerns coronaviruses but describes neither a novel nor an attenuated coronavirus
16306586	10.1128/JVI.79.24.15142-15150.2005	Blockade of neutrophil elastase attenuates severe liver injury in hepatitis B transgenic mice	Takai S., Kimura K., Nagaki M., Satake S., Kakimi K., Moriwaki H.	Journal of Virology	2005	Record does not concern coronaviruses
24830865	10.1016/j.intimp.2014.04.027	Blocking TLR2 in vivo attenuates experimental hepatitis induced by concanavalin A in mice	Zhou M., Zhu X., Ye S., Zhou B.	International Immunopharmacology	2014	Record does not concern coronaviruses
11585619	10.1016/s0165-5728(01)00374-5	Blood-retinal barrier breakdown in experimental coronavirus retinopathy: association with viral antigen, inflammation, and VEGF in sensitive and resistant strains	Vinores SA, Wang Y, Vinores MA, Derevjanik NL, Shi A, Klein DA, Detrick B, Hooks JJ.	J Neuroimmunol	2001	Record concerns coronaviruses but describes neither a novel nor an attenuated coronavirus
33336934	10.1002/oby.23111	BMI and Outcomes of SARS-CoV-2 Among US Veterans	Eastment M.C., Berry K., Locke E., Green P., O’Hare A., Crothers K., Dominitz J.A., Fan V.S., Shah J.A., Ioannou G.N.	Obesity	2021	Record concerns coronaviruses but describes neither a novel nor an attenuated coronavirus
	10.3390/life11090896	BNT162b2 SARS-CoV-2 vaccination elicits high titers of neutralizing antibodies to both b.1 and p.1 variants in previously infected and uninfected subjects	Vicenti I., Gatti F., Scaggiante R., Boccuto A., Zago D., Basso M., Dragoni F., Parisi S.G., Zazzi M.	Life	2021	Record concerns coronaviruses but describes neither a novel nor an attenuated coronavirus
33899031	10.1016/j.xcrm.2021.100264	BNT162b2 vaccination effectively prevents the rapid rise of SARS-CoV-2 variant B.1.1.7 in high-risk populations in Israel	Munitz A, Yechezkel M, Dickstein Y, Yamin D, Gerlic M.	Cell Rep Med	2021	Record concerns coronaviruses but describes neither a novel nor an attenuated coronavirus
34607791	10.1136/annrheumdis-2021-221097	BNT162b2 vaccine-induced humoral and cellular responses against SARS-CoV-2 variants in systemic lupus erythematosus	Moyon Q, Sterlin D, Miyara M, Anna F, Mathian A, Lhote R, Ghillani-Dalbin P, Breillat P, Mudumba S, de Alba S, Cohen-Aubart F, Haroche J, Pha M, Boutin THD, Chaieb H, Flores PM, Charneau P, Gorochov G, Amoura Z.	Ann Rheum Dis	2021	Record concerns coronaviruses but describes neither a novel nor an attenuated coronavirus
34111888	10.1038/s41586-021-03693-y	BNT162b2-elicited neutralization of B.1.617 and other SARS-CoV-2 variants	Liu J, Liu Y, Xia H, Zou J, Weaver SC, Swanson KA, Cai H, Cutler M, Cooper D, Muik A, Jansen KU, Sahin U, Xie X, Dormitzer PR, Shi PY.	Nature	2021	Record concerns coronaviruses but describes neither a novel nor an attenuated coronavirus
32630032	10.3390/ijms21134670	Body composition findings by computed tomography in sars-cov-2 patients: Increased risk of muscle wasting in obesity	Gualtieri P., Falcone C., Romano L., Macheda S., Correale P., Arciello P., Polimeni N., De Lorenzo A.	International Journal of Molecular Sciences	2020	Record concerns coronaviruses but describes neither a novel nor an attenuated coronavirus
28318408	10.1089/scd.2016.0348	Bone Marrow-Derived Mesenchymal Stem Cells Attenuate Immune-Mediated Liver Injury and Compromise Virus Control during Acute Hepatitis B Virus Infection in Mice	Qu M., Yuan X., Liu D., Ma Y., Zhu J., Cui J., Yu M., Li C., Guo D.	Stem Cells and Development	2017	Record does not concern coronaviruses
34334952	10.1016/j.diamond.2021.108542	Boron doped diamond thin films for the electrochemical detection of SARS-CoV-2 S1 protein	Witt S, Rogien A, Werner D, Siegenthaler J, Lesiyon R, Kurien N, Rechenberg R, Baule N, Hardy A, Becker M.	Diam Relat Mater	2021	Record concerns coronaviruses but describes neither a novel nor an attenuated coronavirus
571025	10.1128/jvi.29.1.293-300.1979	Bovine coronavirus genome.	Guy J.S., Brian D.A.	Journal of virology	1979	The sequence of coronavirus described by the record is not known
31456086	10.1007/s00705-019-04384-w	Bovine coronavirus in Uruguay: genetic diversity, risk factors and transboundary introductions from neighboring countries	Castells M., Giannitti F., Caffarena R.D., Casaux M.L., Schild C., Castells D., Riet-Correa F., Victoria M., Parreño V., Colina R.	Archives of Virology	2019	Record concerns coronaviruses but describes neither a novel nor an attenuated coronavirus
34212242	10.1007/s00705-021-05147-2	Bovine coronavirus infections in Turkey: molecular analysis of the full-length spike gene sequences of viruses from digestive and respiratory infections	Sevinc Temizkan S, Alkan F.	Arch Virol	2021	Record describes a novel non-attenuated coronavirus
7086972	10.1128/jvi.42.2.700-707.1982	Bovine coronavirus structural proteins	King B., Brian D.A.	Journal of Virology	1982	Record concerns coronaviruses but describes neither a novel nor an attenuated coronavirus
33182765	10.3390/v12111285	Bovine Coronavirus: Variability, Evolution, and Dispersal Patterns of a No Longer Neglected Betacoronavirus	Franzo G, Drigo M, Legnardi M, Grassi L, Pasotto D, Menandro ML, Cecchinato M, Tucciarone CM.	Viruses	2020	Record concerns coronaviruses but describes neither a novel nor an attenuated coronavirus
23246548	10.1016/j.vaccine.2012.12.006	Bovine coronaviruses from the respiratory tract: Antigenic and genetic diversity	Fulton R.W., Ridpath J.F., Burge L.J.	Vaccine	2013	Record describes a novel non-attenuated coronavirus
3376625	10.1111/j.1439-0450.1988.tb00465.x	Bovine Coronavirus‐Induced Cytopathic Expression and Plaque Formation: Host Cell and Virus Strain Determine Trypsin Dependence	Cyr‐Coats K.St., Storz J.	Journal of Veterinary Medicine, Series B	1988	Record describes a novel non-attenuated coronavirus
12968752	10.1177/104063879901100503	Bovine viral diarrhea virus isolated from fetal calf serum enhances pathogenicity of attenuated transmissible gastroenteritis virus in neonatal pigs	Woods R.D., Kunkle R.A., Ridpath J.F., Bolin S.R.	Journal of Veterinary Diagnostic Investigation	1999	PASS	The sequence of coronavirus described by the record is not known
18842722	10.1128/JVI.01586-08	Bovine-like coronaviruses isolated from four species of captive wild ruminants are homologous to bovine coronaviruses, based on complete genomic sequences	Alekseev K.P., Vlasova A.N., Jung K., Hasoksuz M., Zhang X., Halpin R., Wang S., Ghedin E., Spiro D., Saif L.J.	Journal of Virology	2008	Record describes a novel non-attenuated coronavirus
		Brace for flu season: Keep up-to-date on flu vaccine options and counseling considerations, especially as coronavirus disease 2019 continues to strike	Gershman J.	Drug Topics	2020	Record concerns coronaviruses but describes neither a novel nor an attenuated coronavirus
34647691	10.15252/emmm.202114459	Brain cross-protection against SARS-CoV-2 variants by a lentiviral vaccine in new transgenic mice	Ku MW, Authié P, Bourgine M, Anna F, Noirat A, Moncoq F, Vesin B, Nevo F, Lopez J, Souque P, Blanc C, Fert I, Chardenoux S, Lafosse L, Cussigh D, Hardy D, Nemirov K, Guinet F, Langa Vives F, Majlessi L, Charneau P.	EMBO Mol Med	2021	Record concerns coronaviruses but describes neither a novel nor an attenuated coronavirus
26202229	10.1128/JVI.01501-15	Brain invasion by mouse hepatitis virus depends on impairment of tight junctions and beta interferon production in brain microvascular endothelial cells	Bleau C., Filliol A., Samson M., Lamontagne L.	Journal of Virology	2015	Record concerns coronaviruses but describes neither a novel nor an attenuated coronavirus
25156780	10.1111/liv.12675	Branched-chain amino acids reduce hepatic iron accumulation and oxidative stress in hepatitis C virus polyprotein-expressing mice	Korenaga M., Nishina S., Korenaga K., Tomiyama Y., Yoshioka N., Hara Y., Sasaki Y., Shimonaka Y., Hino K.	Liver International	2015	Record does not concern coronaviruses
34105594	10.1590/1980-549720210022	Brazil in the face of new SARS-CoV-2 variants: emergencies and challenges in public health	Marquitti FMD, Coutinho RM, Ferreira LS, Borges ME, Portella TP, Silva RLPD, Canton O, Poloni S, Franco C, Coelho V, Barberia L, Bolle M, Boing AC, Donalisio MR, Boing AF, Silva AAMD, Prado PI, Veras MASM, Kraenkel RA.	Rev Bras Epidemiol	2021	Record concerns coronaviruses but describes neither a novel nor an attenuated coronavirus
	10.1080/03079459994506	Breadth of protection of the respiratory tract provided by different live-attenuated infectious bronchitis vaccines against challenge with infectious bronchitis viruses of heterologous serotypes	Cook J.K.A., Orbell S.J., Woods M.A., Huggins M.B.	Avian Pathology	1999	PASS	The sequence of coronavirus described by the record is not known
33837392	10.1093/infdis/jiab195	Broad Severe Acute Respiratory Syndrome Coronavirus 2 Cell Tropism and Immunopathology in Lung Tissues from Fatal Coronavirus Disease 2019	Ramos Da Silva S., Ju E., Meng W., Paniz Mondolfi A.E., Dacic S., Green A., Bryce C., Grimes Z., Fowkes M., Sordillo E.M., Cordon-Cardo C., Guo H., Gao S.-J.	Journal of Infectious Diseases	2021	Record concerns coronaviruses but describes neither a novel nor an attenuated coronavirus
34093595	10.3389/fimmu.2021.688436	Broad T Cell Targeting of Structural Proteins After SARS-CoV-2 Infection: High Throughput Assessment of T Cell Reactivity Using an Automated Interferon Gamma Release Assay	Brand I, Gilberg L, Bruger J, Garí M, Wieser A, Eser TM, Frese J, Ahmed MIM, Rubio-Acero R, Guggenbuehl Noller JM, Castelletti N, Diekmannshemke J, Thiesbrummel S, Huynh D, Winter S, Kroidl I, Fuchs C, Hoelscher M, Roider J, Kobold S, Pritsch M, Geldmacher C.	Front Immunol	2021	Record concerns coronaviruses but describes neither a novel nor an attenuated coronavirus
		Bromodomain and extraterminal (BET) protein inhibitor, apabetalone, reduces ACE2 expression and attenuates SARS-CoV-2 infection in vitro	Gilham, D; Smith, AL; Fu, L; Moore, DY; Muralidharan, A; Reid, SPM; Stotz, SC; Johansson, JO; Sweeney, M; Wong, NCW; El-Gamal, D; Kulikowski, E	EUROPEAN HEART JOURNAL	2021	Record concerns coronaviruses but describes neither a novel nor an attenuated coronavirus
	10.3390/biomedicines9040437	Bromodomain and extraterminal protein inhibitor, apabetalone (Rvx-208), reduces ace2 expression and attenuates sars-cov-2 infection in vitro	Gilham D., Smith A.L., Fu L., Moore D.Y., Muralidharan A., Reid S.P.M., Stotz S.C., Johansson J.O., Sweeney M., Wong N.C.W., Kulikowski E., El-Gamal D.	Biomedicines	2021	Record concerns coronaviruses but describes neither a novel nor an attenuated coronavirus
24604562	10.1002/hep.27114	C5a/C5aR pathway is essential for the pathogenesis of murine viral fulminant hepatitis by way of potentiating Fgl2/fibroleukin expression	Xu G.-L., Chen J., Yang F., Li G.-Q., Zheng L.-X., Wu Y.-Z.	Hepatology	2014	Record concerns coronaviruses but describes neither a novel nor an attenuated coronavirus
33419245	10.3390/v12121471	Can coronaviruses steal genes from the host as evidenced in western european hedgehogs by ericov genetic characterization?	De Sabato L., Di Bartolo I., De Marco M.A., Moreno A., Lelli D., Cotti C., Delogu M., Vaccari G.	Viruses	2020	Record concerns coronaviruses but describes neither a novel nor an attenuated coronavirus
	10.3389/fbioe.2020.00554	Can Stem Cells Beat COVID-19: Advancing Stem Cells and Extracellular Vesicles Toward Mainstream Medicine for Lung Injuries Associated With SARS-CoV-2 Infections	Chrzanowski W., Kim S.Y., McClements L.	Frontiers in Bioengineering and Biotechnology	2020	Record concerns coronaviruses but describes neither a novel nor an attenuated coronavirus
		CANINE CORONAVIRUS ENTERITIS AND A RECENT OUTBREAK FOLLOWING MODIFIED LIVE VIRUS VACCINATION	MARTIN, ML	COMPENDIUM ON CONTINUING EDUCATION FOR THE PRACTICING VETERINARIAN	1985	Report not retrieved
17513145	10.1016/j.tvjl.2007.03.019	Canine coronavirus inactivation with physical and chemical agents	Pratelli A.	Vet J	2008	Record concerns coronaviruses but describes neither a novel nor an attenuated coronavirus
10458093	10.1292/jvms.61.731	Canine Coronavirus Infections in Japan: Virological and Epidemiological Aspects	Bandai C., Ishiguro S., Masuya N., Hohdatsu T., Mochizuki M.	Journal of Veterinary Medical Science	1999	Record concerns coronaviruses but describes neither a novel nor an attenuated coronavirus
30959796	10.3390/v11040328	Canine Respiratory Coronavirus, Bovine Coronavirus, and Human Coronavirus OC43: Receptors and Attachment Factors	Szczepanski A., Owczarek K., Bzowska M., Gula K., Drebot I., Ochman M., Maksym B., Rajfur Z., Mitchell J.A., Pyrc K.	Viruses	2019	Record concerns coronaviruses but describes neither a novel nor an attenuated coronavirus
35007072	10.1021/acs.jnatprod.1c00946	Cannabinoids Block Cellular Entry of SARS-CoV-2 and the Emerging Variants	van Breemen RB, Muchiri RN, Bates TA, Weinstein JB, Leier HC, Farley S, Tafesse FG.	J Nat Prod	2022	Record concerns coronaviruses but describes neither a novel nor an attenuated coronavirus
		Capsule: A live impaired-fidelity coronavirus vaccine protects in an aged, immunocompromised mouse model of lethal disease	Israeli E.	Israel Medical Association Journal	2012	PASS	Report not retrieved
10727830	10.1016/s0378-1135(99)00208-4	Capture ELISA systems for the detection of bovine coronavirus-specific IgA and IgM antibodies in milk and serum	Näslund K, Tråvén M, Larsson B, Silván A, Linde N.	Vet Microbiol	2000	Record concerns coronaviruses but describes neither a novel nor an attenuated coronavirus
34508837	10.1016/j.echo.2021.08.022	Cardiorespiratory Abnormalities in Patients Recovering from Coronavirus Disease 2019	Szekely Y., Lichter Y., Sadon S., Lupu L., Taieb P., Banai A., Sapir O., Granot Y., Hochstadt A., Friedman S., Laufer-Perl M., Banai S., Topilsky Y.	Journal of the American Society of Echocardiography	2021	Record concerns coronaviruses but describes neither a novel nor an attenuated coronavirus
33613575	10.3389/fimmu.2021.627186	Case Report: Adequate T and B Cell Responses in a SARS-CoV-2 Infected Patient After Immune Checkpoint Inhibition	de Joode K, Oostvogels AAM, GeurtsvanKessel CH, de Vries RD, Mathijssen RHJ, Debets R, van der Veldt AAM.	Front Immunol	2021	Record concerns coronaviruses but describes neither a novel nor an attenuated coronavirus
	10.1186/s40780-021-00233-8	Casirivimab-imdevimab neutralizing SARS-CoV-2: post-infusion clinical events and their risk factors	Yoshida J., Shiraishi K., Tamura T., Otani K., Kikuchi T., Mataga A., Ueno T., Tanaka M.	Journal of Pharmaceutical Health Care and Sciences	2022	Record concerns coronaviruses but describes neither a novel nor an attenuated coronavirus
33993490	10.1111/all.14907	Caspases and therapeutic potential of caspase inhibitors in moderate–severe SARS CoV2 infection and long COVID	Plassmeyer M., Alpan O., Corley M.J., Premeaux T.A., Lillard K., Coatney P., Vaziri T., Michalsky S., Pang A.P.S., Bukhari Z., Yeung S.T., Evering T.H., Naughton G., Latterich M., Mudd P., Spada A., Rindone N., Loizou D., Ulrik Sønder S., Ndhlovu L.C., Gupta R.	Allergy: European Journal of Allergy and Clinical Immunology	2021	Record concerns coronaviruses but describes neither a novel nor an attenuated coronavirus
33731349	10.1126/sciadv.abe5940	Catalytic amplification by transition-state molecular switches for direct and sensitive detection of SARS-CoV-2	Sundah NR, Natalia A, Liu Y, Ho NRY, Zhao H, Chen Y, Miow QH, Wang Y, Beh DLL, Chew KL, Chan D, Tambyah PA, Ong CWM, Shao H.	Sci Adv	2021	Record concerns coronaviruses but describes neither a novel nor an attenuated coronavirus
34342536	10.1128/mSystems.00392-21	Catching SARS-CoV-2 by Sequence Hybridization: a Comparative Analysis	Rehn A, Braun P, Knüpfer M, Wölfel R, Antwerpen MH, Walter MC.	mSystems	2021	Record concerns coronaviruses but describes neither a novel nor an attenuated coronavirus
34427640	10.1093/gbe/evab196	Causes and Consequences of Purifying Selection on SARS-CoV-2	Morales, AC; Rice, AM; Ho, AT; Mordstein, C; Muhlhausen, S; Watson, S; Cano, L; Young, B; Kudla, G; Hurst, LD	GENOME BIOLOGY AND EVOLUTION	2021	Record concerns coronaviruses but describes neither a novel nor an attenuated coronavirus
	10.1016/S0168-8278(18)31457-0	CC10 protein attenuates hepatic injury in MHV-3 induced fulminant hepatitis by inhibiting fgl2 expression on macrophages	Yu, H; Wang, H; Wan, X; Huang, J; Yan, W; Xi, D; Wang, X; Ning, Q	JOURNAL OF HEPATOLOGY	2018	Record concerns coronaviruses but describes neither a novel nor an attenuated coronavirus
15368307	10.1002/eji.200425071	CCL3/MIP-1α is pro-inflammatory in murine T cell-mediated hepatitis by recruiting CCR1-expressing CD4+ T cells to the liver	Ajuebor M.N., Hogaboam C.M., Le T., Proudfoot A.E.I., Swain M.G.	European Journal of Immunology	2004	Record concerns coronaviruses but describes neither a novel nor an attenuated coronavirus
34749524	10.1128/mBio.02749-21	CCR2 Signaling Restricts SARS-CoV-2 Infection	Vanderheiden A, Thomas J, Soung AL, Davis-Gardner ME, Floyd K, Jin F, Cowan DA, Pellegrini K, Shi PY, Grakoui A, Klein RS, Bosinger SE, Kohlmeier JE, Menachery VD, Suthar MS.	mBio	2021	Record concerns coronaviruses but describes neither a novel nor an attenuated coronavirus
16025512	10.1002/hep.20802	CD154-CD40 interactions drive hepatocyte apoptosis in murine fulminant hepatitis	Zhou F., Ajuebor M.N., Beck P.L., Le T., Hogaboam G.M., Swain M.G.	Hepatology	2005	Record does not concern coronaviruses
29220536	10.1002/hep.29716	CD36 deficiency attenuates immune-mediated hepatitis in mice by modulating the proapoptotic effects of CXC chemokine ligand 10	Xu C., Zhang C., Ji J., Wang C., Yang J., Geng B., Zhao T., Zhou H., Mu X., Pan J., Hu S., Lv Y., Chen X., Wen H., You Q.	Hepatology	2018	Record does not concern coronaviruses
34012431	10.3389/fimmu.2021.629102	CD4(+) T Cells of Prostate Cancer Patients Have Decreased Immune Responses to Antigens Derived From SARS-CoV-2 Spike Glycoprotein	Taborska P, Strizova Z, Stakheev D, Sojka L, Bartunkova J, Smrz D.	Front Immunol	2021	Record concerns coronaviruses but describes neither a novel nor an attenuated coronavirus
35061630	10.1172/JCI156083	CD4+ T-cells from COVID-19 mRNA vaccine recipients recognize a conserved epitope present in diverse coronaviruses	Woldemeskel BA, Dykema AG, Garliss C, Cherfils S, Smith KN, Blankson JN.	J Clin Invest	2022	Record concerns coronaviruses but describes neither a novel nor an attenuated coronavirus
26067079	10.1159/000431150	CD4+CD25+ Regulatory T Cells Inhibit Natural Killer Cell Hepatocytotoxicity of Hepatitis B Virus Transgenic Mice via Membrane-Bound TGF-β and OX40	Chen Y., Sun R., Wu X., Cheng M., Wei H., Tian Z.	Journal of Innate Immunity	2016	Record does not concern coronaviruses
25315497	10.1016/j.molimm.2014.09.015	CD4+Foxp3+ Tregs protect against innate immune cell-mediated fulminant hepatitis in mice	Hou X., Song J., Su J., Huang D., Gao W., Yan J., Shen J.	Molecular Immunology	2015	Record does not concern coronaviruses
30558354	10.3390/v10120718	CD8+ T cells responding to the middle east respiratory syndrome coronavirus nucleocapsid protein delivered by vaccinia virus MVA in mice	Veit S., Jany S., Fux R., Sutter G., Volz A.	Viruses	2018	Record concerns coronaviruses but describes neither a novel nor an attenuated coronavirus
34283810	10.1172/jci.insight.151571	CD8+PD-L1+CXCR3+ polyfunctional T cell abundances are associated with survival in critical SARS-CoV-2–infected patients	Adam L., Rosenbaum P., Quentric P., Parizot C., Bonduelle O., Guillou N., Corneau A., Dorgham K., Miyara M., Luyt C.-E., Guihot A., Gorochov G., Combadière C., Combadière B.	JCI Insight	2021	Record concerns coronaviruses but describes neither a novel nor an attenuated coronavirus
28381581	10.1128/JVI.00273-17	Cell Attachment Domains of the Porcine Epidemic Diarrhea Virus Spike Protein Are Key Targets of Neutralizing Antibodies	Li C, Li W, Lucio de Esesarte E, Guo H, van den Elzen P, Aarts E, van den Born E, Rottier PJM, Bosch BJ.	J Virol	2017	Record concerns coronaviruses but describes neither a novel nor an attenuated coronavirus
29100707	10.1016/j.vaccine.2017.10.052	Cell attenuated porcine epidemic diarrhea virus strain Zhejiang08 provides effective immune protection attributed to dendritic cell stimulation	Li Y., Wang G., Wang J., Man K., Yang Q.	Vaccine	2017	PASS	The sequence of coronavirus described by the record is not known
25217400	10.1016/j.vetmic.2014.08.012	Cell culture isolation and sequence analysis of genetically diverse US porcine epidemic diarrhea virus strains including a novel strain with a large deletion in the spike gene	Oka T., Saif L.J., Marthaler D., Esseili M.A., Meulia T., Lin C.-M., Vlasova A.N., Jung K., Zhang Y., Wang Q.	Veterinary Microbiology	2014	Record describes a novel non-attenuated coronavirus
2166085	10.1128/jcm.28.6.1454-1457.1990	Cell culture propagation of a coronavirus isolated from cows with winter dysentery	Benfield DA, Saif LJ.	J Clin Microbiol	1990	PASS	The sequence of coronavirus described by the record is not known
	10.1007/BF01404267	Cell culture propagation of bovine coronavirus	Saif L.J., Heckert R.A., Miller K.L., Tarek M.M.	Journal of Tissue Culture Methods	1988	Record describes a novel non-attenuated coronavirus
4191129		Cell culture-adapted SH strain of transmissible gastroenteritis virus of pigs: in vivo and in vitro studies.	Pensaert M.B., Burnstein T., Haelterman E.O.	American Journal of Veterinary Research	1970	The sequence of coronavirus described by the record is not known
23631916	10.1128/mBio.00165-13	Cell host response to infection with novel human coronavirus EMC predicts potential antivirals and important differences with SARS coronavirus	Josset L, Menachery VD, Gralinski LE, Agnihothram S, Sova P, Carter VS, Yount BL, Graham RL, Baric RS, Katze MG.	mBio	2013	Record concerns coronaviruses but describes neither a novel nor an attenuated coronavirus
6304837	10.1016/s0034-5288(18)32264-1	Cell mediated and humoral immune response of chickens to inactivated oil-emulsion infectious bronchitis vaccine	Timms L.M., Bracewell C.D.	Research in Veterinary Science	1983	Record concerns coronaviruses but describes neither a novel nor an attenuated coronavirus
6275477	10.1016/s0034-5288(18)32492-5	Cell mediated and humoral immune response of chickens to live infectious bronchitis vaccines	Timms L.M., Bracewell C.D.	Research in Veterinary Science	1981	The sequence of coronavirus described by the record is not known
34931184	10.21203/rs.3.rs-1162804/v1	Cell Surface SARS-CoV-2 Nucleocapsid Protein Modulates Innate and Adaptive Immunity	Yewdell J, Lopez-Munoz A, Kosik I, Holly J.	Res Sq	2021	Record concerns coronaviruses but describes neither a novel nor an attenuated coronavirus
6281976	10.1016/0042-6822(82)90092-7	Cell tropism and expression of mouse hepatitis viruses (MHV) in mouse spinal cord cultures	Dubois-Dalcq M.E., Doller E.W., Haspel M.V., Holmes K.V.	Virology	1982	Record does not describe an in vivo study
		CELL-CULTURE ADAPTATION STUDIES OF INFECTIOUS BRONCHITIS VIRUSES	COWEN, BS	JOURNAL OF THE AMERICAN VETERINARY MEDICAL ASSOCIATION	1974	The sequence of coronavirus described by the record is not known
34445747	10.3390/ijms22169041	Cell-free hemoglobin does not attenuate the effects of sars-cov-2 spike protein s1 subunit in pulmonary endothelial cells	Jana S., Heaven M.R., Alayash A.I.	International Journal of Molecular Sciences	2021	Record concerns coronaviruses but describes neither a novel nor an attenuated coronavirus
33080068	10.1002/eji.202048915	Cell-mediated and humoral adaptive immune responses to SARS-CoV-2 are lower in asymptomatic than symptomatic COVID-19 patients	Mazzoni A., Maggi L., Capone M., Spinicci M., Salvati L., Colao M.G., Vanni A., Kiros S.T., Mencarini J., Zammarchi L., Mantengoli E., Menicacci L., Caldini E., Romagnani S., Liotta F., Morettini A., Rossolini G.M., Bartoloni A., Cosmi L., Annunziato F.	European Journal of Immunology	2020	Record concerns coronaviruses but describes neither a novel nor an attenuated coronavirus
23948147	10.1016/j.dci.2013.08.002	Cell-mediated immune responses in the head-associated lymphoid tissues induced to a live attenuated avian coronavirus vaccine	Gurjar R.S., Gulley S.L., van Ginkel F.W.	Developmental and Comparative Immunology	2013	PASS	The sequence of coronavirus described by the record is not known
2845840		Cell-mediated immune responses of suckling pigs inoculated with attenuated or virulent transmissible gastroenteritis virus.	Welch S.K., Saif L.J., Ram S.	American journal of veterinary research	1988	PASS	Report not retrieved
23698313	10.1128/JVI.00769-13	Cell-type-specific activation of the oligoadenylate synthetase-RNase L pathway by a murine coronavirus	Zhao L, Birdwell LD, Wu A, Elliott R, Rose KM, Phillips JM, Li Y, Grinspan J, Silverman RH, Weiss SR.	J Virol	2013	Record concerns coronaviruses but describes neither a novel nor an attenuated coronavirus
21752905	10.1128/JVI.05075-11	Cell-type-specific type I interferon antagonism influences organ tropism of murine coronavirus	Zhao L., Rose K.M., Elliott R., van Rooijen N., Weiss S.R.	Journal of Virology	2011	Record describes coronavirus attenuation method that cannot be applied to SARS-CoV-2
33972374	10.4049/jimmunol.2100054	Cellular and humoral immune responses in mice immunized with vaccinia virus expressing the sars-cov-2 spike protein	Harbour J.C., Lyski Z.L., Schell J.B., Thomas A., Messer W.B., Slifka M.K., Nolz J.C.	Journal of Immunology	2021	Record concerns coronaviruses but describes neither a novel nor an attenuated coronavirus
7924246	10.1016/0147-9571(94)90038-8	Cellular immune status of coronavirus-infected neonatal calves	Kapil S., Goyal S.M., Trent A.M.	Comparative Immunology, Microbiology and Infectious Diseases	1994	PASS	The sequence of coronavirus described by the record is not known
32768236	10.1016/j.vetmic.2020.108793	Cellular poly(C) binding protein 2 interacts with porcine epidemic diarrhea virus papain-like protease 1 and supports viral replication	Zhang P., Yu L., Dong J., Liu Y., Zhang L., Liang P., Wang L., Chen B., Huang L., Song C.	Veterinary Microbiology	2020	Record concerns coronaviruses but describes neither a novel nor an attenuated coronavirus
	10.1080/03079459308418945	Challenge experiments to evaluate cross-protection induced at the trachea and kidney level by vaccine strains and Belgian nephropathogenic isolates of avian infectious bronchitis virus	Lambrechts C., Pensaert M.	Avian Pathology	1993	The sequence of coronavirus described by the record is not known
20353362	10.1086/651579	Challenge pools of hepatitis C virus genotypes 1-6 prototype strains: replication fitness and pathogenicity in chimpanzees and human liver-chimeric mouse models	Bukh J, Meuleman P, Tellier R, Engle RE, Feinstone SM, Eder G, Satterfield WC, Govindarajan S, Krawczynski K, Miller RH, Leroux-Roels G, Purcell RH.	J Infect Dis	2010	Record does not concern coronaviruses
		CHALLENGE TRIAL OF AN INTRANASAL FELINE INFECTIOUS PERITONITIS VACCINE	HOSKINS, JD; TAYLOR, HW; LOMAX, TL	FELINE PRACTICE	1994	PASS	Report not retrieved
21909766	10.1007/s11262-011-0668-7	Changes in nonstructural protein 3 are associated with attenuation in avian coronavirus infectious bronchitis virus	Phillips J.E., Jackwood M.W., McKinley E.T., Thor S.W., Hilt D.A., Acevedol N.D., Williams S.M., Kissinger J.C., Paterson A.H., Robertson J.S., Lemke C.Z.	Virus Genes	2012	Record describes coronavirus attenuation method that cannot be applied to SARS-CoV-2
34673772	10.1371/journal.pmed.1003807	Changes in the associations of race and rurality with SARS-CoV-2 infection, mortality, and case fatality in the United States from February 2020 to March 2021: A population-based cohort study	Ioannou, GN; Ferguson, JM; O'Hare, AM; Bohnert, ASB; Backus, LI; Boyko, EJ; Osborne, TF; Maciejewski, ML; Bowling, CB; Hynes, DM; Iwashyna, TJ; Saysana, M; Green, P; Berry, K	PLOS MEDICINE	2021	Record concerns coronaviruses but describes neither a novel nor an attenuated coronavirus
	10.7717/peerj.12329	Changes in the spike and nucleocapsid protein of porcine epidemic diarrhea virus strain in Vietnam a molecular potential for the vaccine development?	Tran T.X., Lien N.T.K., Thu H.T., Duy N.D., Duong B.T.T., Quyen D.V.	PeerJ	2021	The sequence of coronavirus described by the record is not known
27974570	10.1128/JVI.02158-16	Channel-inactivating mutations and their revertant mutants in the envelope protein of infectious bronchitis virus	To J., Surya W., Fung T.S., Li Y., Verdià-Bàguena C., Queralt-Martin M., Aguilella V.M., Liu D.X., Torres J.	Journal of Virology	2017	PASS	Record does not describe an in vivo study
20483547	10.1016/j.vetmic.2010.04.010	Characterisation of bubaline coronavirus strains associated with gastroenteritis in water buffalo (Bubalus bubalis) calves	Decaro N, Cirone F, Mari V, Nava D, Tinelli A, Elia G, Di Sarno A, Martella V, Colaianni ML, Aprea G, Tempesta M, Buonavoglia C.	Vet Microbiol	2010	Record describes a novel non-attenuated coronavirus
34547443	10.1016/j.ymeth.2021.09.005	Characterisation of SARS-CoV-2 clades based on signature SNPs unveils continuous evolution	Ghosh N, Saha I, Nandi S, Sharma N.	Methods	2021	Record describes a novel non-attenuated coronavirus
	10.1080/03079459108418744	Characterisation of strains of infectious bronchitis virus isolated in Chile	Cubillos A., Ulloa J., Cubillos V., Cook J.K.A.	Avian Pathology	1991	Record not in English
32323011	10.1007/s00330-020-06880-z	Characteristic CT findings distinguishing 2019 novel coronavirus disease (COVID-19) from influenza pneumonia	Wang H., Wei R., Rao G., Zhu J., Song B.	European Radiology	2020	Record concerns coronaviruses but describes neither a novel nor an attenuated coronavirus
	10.3390/pathogens10111479	Characteristics and pathogenicity of the cell-adapted attenuated porcine epidemic diarrhea virus of the non-s indel cluster	Vu T.T.H., Yeom M., Moon H., Tran T.N., Le V.P., Song D.	Pathogens	2021	PASS	Record describes coronavirus attenuation method that cannot be applied to SARS-CoV-2
4823866	10.1007/BF01242179	Characteristics of a coronavirus causing vomition and wasting in pigs	Pensaert MB, Callebaut PE.	Arch Gesamte Virusforsch	1974	Record describes a novel non-attenuated coronavirus
2378568	10.1007/BF01323164	Characteristics of Parker's rat coronavirus (PRC) replicated in L-2 cells	Percy DH, Williams KL, Bond SJ, MacInnes JI.	Arch Virol	1990	Record concerns coronaviruses but describes neither a novel nor an attenuated coronavirus
32715325	10.1007/s00705-020-04744-x	Characteristics of the spike and ORF3 genes of porcine epidemic diarrhea virus in Henan and Shanxi provinces of China	Cui J.-T., Qiao H., Hou C.-Y., Zheng H.-H., Li X.-S., Zheng L.-L., Chen H.-Y.	Archives of Virology	2020	Record does not describe an in vivo study
26955947	10.1186/s12985-016-0497-3	Characterization and analysis of an infectious bronchitis virus strain isolated from southern China in 2013	Xu G., Liu X.-Y., Zhao Y., Chen Y., Zhao J., Zhang G.-Z.	Virology Journal	2016	Record describes a novel non-attenuated coronavirus
18380153		Characterization and epitope mapping of monoclonal antibodies to the nucleocapsid protein of severe acute respiratory syndrome coronavirus	Kariwa H, Noda H, Nakauchi M, Ishizuka M, Hashiguchi K, Hashimoto S, Yoshii K, Asano A, Agui T, Kogaki H, Kurano Y, Uchida Y, Fujii N, Okada M, Takashima I.	Jpn J Vet Res	2008	Record concerns coronaviruses but describes neither a novel nor an attenuated coronavirus
31381232	10.1111/tbed.13321	Characterization and evolution of the coronavirus porcine epidemic diarrhoea virus HLJBY isolated in China	Huan C, Pan H, Fu S, Xu W, Gao Q, Wang X, Gao S, Chen C, Liu X.	Transbound Emerg Dis	2020	Record describes a novel non-attenuated coronavirus
18792774	10.1007/s11262-008-0280-7	Characterization and membrane gene-based phylogenetic analysis of avian infectious bronchitis virus Chinese strain HH06	Ren X, Yin J, Ma D, Li G.	Virus Genes	2009	Record concerns coronaviruses but describes neither a novel nor an attenuated coronavirus
31660993	10.1186/s12985-019-1232-7	Characterization and pathogenicity of Vero cell-attenuated porcine epidemic diarrhea virus CT strain	Wu Y., Li W., Zhou Q., Li Q., Xu Z., Shen H., Chen F.	Virology Journal	2019	PASS	Record describes coronavirus attenuation method that cannot be applied to SARS-CoV-2
1689128		Characterization and reactivity of monoclonal antibodies to the Miller strain of transmissible gastroenteritis virus of swine.	Zhu X.L., Paul P.S., Vaughn E., Morales A.	American journal of veterinary research	1990	Record concerns coronaviruses but describes neither a novel nor an attenuated coronavirus
786086		Characterization of a calf diarrheal coronavirus.	Sharpee R.L., Mebus C.A., Bass E.P.	American Journal of Veterinary Research	1976	Record describes a novel non-attenuated coronavirus
34452380	10.3390/v13081514	Characterization of a Lineage C.36 SARS-CoV-2 Isolate with Reduced Susceptibility to Neutralization Circulating in Lombardy, Italy	Castelli M, Baj A, Criscuolo E, Ferrarese R, Diotti RA, Sampaolo M, Novazzi F, Dalla Gasperina D, Focosi D, Ferrari D, Locatelli M, Clementi M, Clementi N, Maggi F, Mancini N.	Viruses	2021	Record describes a novel non-attenuated coronavirus
19625463	10.1099/vir.0.012476-0	Characterization of a new genotype and serotype of infectious bronchitis virus in Western Africa	Ducatez M.F., Martin A.M., Owoade A.A., Olatoye I.O., Alkali B.R., Maikano I., Snoeck C.J., Sausy A., Cordioli P., Muller C.P.	Journal of General Virology	2009	Record describes a novel non-attenuated coronavirus
1120038		Characterization of a new infectious bronchitis virus isolate. III. Cell-culture adaptation of Clark 333	Cowen BS, Hitchner SB.	Avian Dis	1975	Record does not describe an in vivo study
26618736	10.1080/09168451.2015.1101330	Characterization of a new Lactobacillus salivarius strain engineered to express IBV multi-epitope antigens by chromosomal integration	Ma BC, Yang X, Wang HN, Cao HP, Xu PW, Ding MD, Liu H.	Biosci Biotechnol Biochem	2016	Record concerns coronaviruses but describes neither a novel nor an attenuated coronavirus
34140350	10.1073/pnas.2106535118	Characterization of a new SARS-CoV-2 variant that emerged in Brazil	Imai M, Halfmann PJ, Yamayoshi S, Iwatsuki-Horimoto K, Chiba S, Watanabe T, Nakajima N, Ito M, Kuroda M, Kiso M, Maemura T, Takahashi K, Loeber S, Hatta M, Koga M, Nagai H, Yamamoto S, Saito M, Adachi E, Akasaka O, Nakamura M, Nakachi I, Ogura T, Baba R, Fujita K, Ochi J, Mitamura K, Kato H, Nakajima H, Yagi K, Hattori SI, Maeda K, Suzuki T, Miyazato Y, Valdez R, Gherasim C, Furusawa Y, Okuda M, …	Proc Natl Acad Sci U S A	2021	Record describes a novel non-attenuated coronavirus
31419711	10.1016/j.virol.2019.08.006	Characterization of a novel bat-HKU2-like swine enteric alphacoronavirus (SeACoV) infection in cultured cells and development of a SeACoV infectious clone	Yang Y.-L., Liang Q.-Z., Xu S.-Y., Mazing E., Xu G.-H., Peng L., Qin P., Wang B., Huang Y.-W.	Virology	2019	Record concerns coronaviruses but describes neither a novel nor an attenuated coronavirus
20153350	10.1016/j.vaccine.2010.01.062	Characterization of a novel live attenuated infectious bronchitis virus vaccine candidate derived from a Korean nephropathogenic strain	Lee H.J., Youn H.N., Kwon J.S., Lee Y.J., Kim J.H., Lee J.B., Park S.Y., Choi I.S., Song C.S.	Vaccine	2010	PASS	The sequence of coronavirus described by the record is not known
26733065	10.1128/mBio.01451-15	Characterization of a pathogenic full-length cDNA clone and transmission model for porcine epidemic diarrhea virus strain PC22A	Beall A., Yount B., Lin C.-M., Hou Y., Wang Q., Saif L., Baric R.	mBio	2016	Record describes coronavirus attenuation method that cannot be applied to SARS-CoV-2
27770703	10.1016/j.virol.2016.10.011	Characterization of a pathogenic full-length cDNA clone of a virulent porcine epidemic diarrhea virus strain AH2012/12 in China	Fan B., Yu Z., Pang F., Xu X., Zhang B., Guo R., He K., Li B.	Virology	2017	Record describes a novel non-attenuated coronavirus
	10.5414/NHX02212	Characterization of a putative human coronavirus (HCoV-229E)-encoded ion channel protein	Renigunta A., Friedrich A., Madhugiri R., Renigunta V.K., Weber S., Ziebuhr J.	Nieren- und Hochdruckkrankheiten	2021	Record does not describe an in vivo study
23182435	10.1016/j.vetmic.2012.10.027	Characterization of a recombinant coronavirus infectious bronchitis virus with distinct S1 subunits of spike and nucleocapsid genes and a 3' untranslated region	Liu X., Ma H., Xu Q., Sun N., Han Z., Sun C., Guo H., Shao Y., Kong X., Liu S.	Veterinary Microbiology	2013	Record describes a novel non-attenuated coronavirus
2558634	10.1007/BF01311080	Characterization of a temperature sensitive feline infectious peritonitis coronavirus	Christianson K.K., Ingersoll J.D., Landon R.M., Pfeiffer N.E., Gerber J.D.	Archives of Virology	1989	PASS	The sequence of coronavirus described by the record is not known
20712488	10.1089/vim.2010.0008	Characterization of a variant virus from ascitic fluid of subacute granulomatous serositis in interferon-gamma-deficient C57BL/6 mice persistently infected with murine coronavirus strain JHM	Kyuwa S, Takagaki S, Matsuyama S, Taguchi F, Saegusa J, Iwakura Y, Tagawa Y, Yoshikawa Y.	Viral Immunol	2010	Record concerns coronaviruses but describes neither a novel nor an attenuated coronavirus
1658437		Characterization of accessory cell function during acute infection of BALB/cByJ mice with mouse hepatitis virus (MHV), strain JHM	de Souza MS, Smith AL.	Lab Anim Sci	1991	Record concerns coronaviruses but describes neither a novel nor an attenuated coronavirus
33986286	10.1038/s41467-021-23166-0	Characterization of an attenuated SARS-CoV-2 variant with a deletion at the S1/S2 junction of the spike protein	Wang P., Lau S.-Y., Deng S., Chen P., Mok B.W.-Y., Zhang A.J., Lee A.C.-Y., Chan K.-H., Tam R.C.-Y., Xu H., Zhou R., Song W., Liu L., To K.K.-W., Chan J.F.-W., Chen Z., Yuen K.-Y., Chen H.	Nature Communications	2021	PASS	PASS
1966441		Characterization of an attenuated temperature sensitive feline infectious peritonitis vaccine virus	Gerber J.D., Pfeiffer N.E., Ingersoll J.D., Christianson K.K., Landon R.M., Selzer N.L., Beckenhauer W.H.	Advances in Experimental Medicine and Biology	1990	PASS	The sequence of coronavirus described by the record is not known
15228547	10.1111/j.1439-0450.2004.00744.x	Characterization of an avian infectious bronchitis virus isolated in China from chickens with nephritis	Zhou JY, Zhang DY, Ye JX, Cheng LQ.	J Vet Med B Infect Dis Vet Public Health	2004	Record describes a novel non-attenuated coronavirus
34427410	10.1637/aviandiseases-D-21-00037	Characterization of an Infectious Bronchitis Virus Isolated from Commercial Layers Suffering from False Layer Syndrome	Da Silva A.P., Giroux C., Sellers H.S., Mendoza-Reilley A., Stoute S., Gallardo R.A.	Avian Diseases	2021	PASS	Report not retrieved
1334296	10.1136/vr.131.18.408	CHARACTERIZATION OF AN INFECTIOUS-BRONCHITIS VIRUS ISOLATED FROM VACCINATED BROILER BREEDER FLOCKS	PARSONS, D; ELLIS, MM; CAVANAGH, D; COOK, JKA	VETERINARY RECORD	1992	Record describes a novel non-attenuated coronavirus
31118053	10.1186/s12917-019-1909-6	Characterization of antiviral T cell responses during primary and secondary challenge of laboratory cats with feline infectious peritonitis virus (FIPV)	Mustaffa-Kamal F., Liu H., Pedersen N.C., Sparger E.E.	BMC Veterinary Research	2019	Record concerns coronaviruses but describes neither a novel nor an attenuated coronavirus
10418876	10.1016/S0378-1135(99)00042-5	Characterization of bovine coronavirus isolates from eight different states in the USA	Kapil, S; Richardson, KL; Maag, TR; Goyal, SM	VETERINARY MICROBIOLOGY	1999	Record concerns coronaviruses but describes neither a novel nor an attenuated coronavirus
27840394	10.1292/jvms.16-0538	Characterization of canine coronavirus spread among domestic dogs in Vietnam	van Nguyen D, Terada Y, Minami S, Yonemitsu K, Nagata N, LE TD, Kuwata R, Shimoda H, Maeda K.	J Vet Med Sci	2017	Record concerns coronaviruses but describes neither a novel nor an attenuated coronavirus
22995191	10.1016/j.virol.2012.08.037	Characterization of cellular furin content as a potential factor determining the susceptibility of cultured human and animal cells to coronavirus infectious bronchitis virus infection	Tay FP, Huang M, Wang L, Yamada Y, Liu DX.	Virology	2012	Record concerns coronaviruses but describes neither a novel nor an attenuated coronavirus
2538027	10.1016/0042-6822(89)90048-2	Characterization of coronavirus JHM variants isolated from Wistar Furth rats with a viral-induced demyelinating disease	Morris VL, Tieszer C, Mackinnon J, Percy D.	Virology	1989	Record describes a novel non-attenuated coronavirus
9026661	10.1016/S0076-6879(96)75007-3	Characterization of coronavirus RNA polymerase gene products	Herold J., Siddell S., Ziebuhr J.	Methods in Enzymology	1996	Record concerns coronaviruses but describes neither a novel nor an attenuated coronavirus
34611163	10.1038/s41467-021-26137-7	Characterization of humoral and SARS-CoV-2 specific T cell responses in people living with HIV	Alrubayyi A, Gea-Mallorquí E, Touizer E, Hameiri-Bowen D, Kopycinski J, Charlton B, Fisher-Pearson N, Muir L, Rosa A, Roustan C, Earl C, Cherepanov P, Pellegrino P, Waters L, Burns F, Kinloch S, Dong T, Dorrell L, Rowland-Jones S, McCoy LE, Peppa D.	Nat Commun	2021	Record concerns coronaviruses but describes neither a novel nor an attenuated coronavirus
6250429		Characterization of immunoglobulin A antibody in serum of swine inoculated with transmissible gastroenteritis virus.	Kodama Y., Ogata M., Simizu Y.	American Journal of Veterinary Research	1980	PASS	Report not retrieved
31951468	10.1080/03079457.2020.1713987	Characterization of infectious bronchitis virus D181, a new serotype (GII-2)	Molenaar RJ, Dijkman R, de Wit JJ.	Avian Pathol	2020	Record describes a novel non-attenuated coronavirus
30136251	10.1007/s00705-018-4001-9	Characterization of influenza A virus pseudotyped with the spike protein of porcine epidemic diarrhea virus	Wanitchang A., Saenboonrueng J., Srisutthisamphan K., Jongkaewwattana A.	Archives of Virology	2018	Record concerns coronaviruses but describes neither a novel nor an attenuated coronavirus
2992183	10.1016/0168-1702(85)90038-3	Characterization of leader-related small RNAs in coronavirus-infected cells: Further evidence for leader-primed mechanism of transcription	Baric R.S., Stohlman S.A., Razavi M.K., Lai M.M.C.	Virus Research	1985	Record concerns coronaviruses but describes neither a novel nor an attenuated coronavirus
11195651	10.2307/1593069	Characterization of mexican strains of avian infectious bronchitis isolated during 1997	Escorcia M., Jackwood M.W., Lucio B., Petrone V.M., López C., Fehervari T., Téllez G.	Avian Diseases	2000	The sequence of coronavirus described by the record is not known
8230429	10.1128/JVI.67.12.7050-7059.1993	Characterization of mouse hepatitis virus-specific cytotoxic T cells derived from the central nervous system of mice infected with the JHM strain	Stohlman SA, Kyuwa S, Polo JM, Brady D, Lai MM, Bergmann CC.	J Virol	1993	Record concerns coronaviruses but describes neither a novel nor an attenuated coronavirus
23678731	10.1637/10313-080212-Reg.1	Characterization of nephropathogenic infectious bronchitis virus DMV/1639/11 recovered from Delmarva broiler chickens in 2011	Gelb Jr. J., Ladman B.S., Pope C.R., Ruano J.M., Brannick E.M., Bautista D.A., Coughlin C.M., Preskenis L.A.	Avian Diseases	2013	The sequence of coronavirus described by the record is not known
19848084	10.1637/8666-022609-Reg.1	Characterization of new variants of avian infectious bronchitis virus in Tunisia	Bourogâa H., Miled K., Gribâa L., Behi I.E., Ghram A.	Avian Diseases	2009	Record describes a novel non-attenuated coronavirus
		Characterization of newly isolated porcine epidemic diarrhea virus (PEDV) and its resistance to interferon and neutralizing antibody	Shin H.-J.	Journal of Immunology	2020	Record concerns coronaviruses but describes neither a novel nor an attenuated coronavirus
31945421	10.1016/j.virusres.2020.197863	Characterization of novel monoclonal antibodies against MERS-coronavirus spike protein	Goo J, Jeong Y, Park YS, Yang E, Jung DI, Rho S, Park U, Sung H, Park PG, Choi JA, Seo SH, Cho NH, Lee H, Lee JM, Kim JO, Song M.	Virus Res	2020	Record concerns coronaviruses but describes neither a novel nor an attenuated coronavirus
32438523	10.1111/tbed.13637	Characterization of novel, pathogenic field strains of infectious bronchitis virus (IBV) in poultry in Trinidad and Tobago	Brown Jordan A., Fusaro A., Blake L., Milani A., Zamperin G., Brown G., Carrington C.V.F., Monne I., Oura C.A.L.	Transboundary and Emerging Diseases	2020	Record describes a novel non-attenuated coronavirus
28470417	10.1007/s00705-017-3369-2	Characterization of porcine epidemic diarrhea virus infectivity in human embryonic kidney cells	Zhang J., Guo L., Xu Y., Yang L., Shi H., Feng L., Wang Y.	Archives of Virology	2017	Record concerns coronaviruses but describes neither a novel nor an attenuated coronavirus
32964293	10.1007/s00705-020-04812-2	Characterization of S1 gene sequence variations of attenuated QX-like and variant infectious bronchitis virus strains and the pathogenicity of the viruses in specific-pathogen-free chickens	Ismail M.I., Wei T.S., Hair-Bejo M., Omar A.R.	Archives of Virology	2020	PASS	The sequence of coronavirus described by the record is not known
	10.1186/s13578-021-00568-7	Characterization of SARS-CoV-2 proteins reveals Orf6 pathogenicity, subcellular localization, host interactions and attenuation by Selinexor	Lee J.-G., Huang W., Lee H., van de Leemput J., Kane M.A., Han Z.	Cell and Bioscience	2021	Record concerns coronaviruses but describes neither a novel nor an attenuated coronavirus
21617315		Characterization of splenic cells during the early phase of infection with neuropathogenic mouse hepatitis virus	Kashiwazaki H, Taguchi F, Ikehara Y, Watanabe R.	Jpn J Infect Dis	2011	Record concerns coronaviruses but describes neither a novel nor an attenuated coronavirus
11774524	10.1007/978-1-4615-1325-4_82	Characterization of temperature-sensitive (ts) mutants of coronavirus infectious bronchitis virus (IBV)	Shen S., Ding X.L.	Advances in Experimental Medicine and Biology	2001	PASS	Record describes coronavirus attenuation method that cannot be applied to SARS-CoV-2
2829537	10.1007/978-1-4684-1280-2_33	Characterization of temperature-sensitive mutants mouse hepatitis virus type 3.	Martin J.P., Koehren F., Bingen A., Kirn A.	Advances in experimental medicine and biology	1987	PASS	The sequence of coronavirus described by the record is not known
228481	10.1016/0042-6822(79)90567-1	Characterization of the cold-sensitive murine hepatitis virus mutants rescued from latently infected cells by cell fusion	Stohlman SA, Sakaguchi AY, Weiner LP.	Virology	1979	PASS	The sequence of coronavirus described by the record is not known
10666264	10.1128/jvi.74.5.2333-2342.2000	Characterization of the coronavirus mouse hepatitis virus strain A59 small membrane protein E	Raamsman MJ, Locker JK, de Hooge A, de Vries AA, Griffiths G, Vennema H, Rottier PJ.	J Virol	2000	Record concerns coronaviruses but describes neither a novel nor an attenuated coronavirus
32245150	10.3390/pathogens9030233	Characterization of the Humoral Immune Response to Porcine Epidemic Diarrhea Virus Infection under Experimental and Field Conditions Using an AlphaLISA Platform	Kimpston-Burkgren K, Mora-Díaz JC, Roby P, Bjustrom-Kraft J, Main R, Bosse R, Giménez-Lirola LG.	Pathogens	2020	Record concerns coronaviruses but describes neither a novel nor an attenuated coronavirus
7693965	10.1128/JVI.67.12.7041-7049.1993	Characterization of the Ld-restricted cytotoxic T-lymphocyte epitope in the mouse hepatitis virus nucleocapsid protein	Bergmann C, McMillan M, Stohlman S.	J Virol	1993	Record concerns coronaviruses but describes neither a novel nor an attenuated coronavirus
10534351	10.1002/hep.510300508	Characterization of the reactivity pattern of murine monoclonal antibodies against wild-type hepatitis B surface antigen to G145R and other naturally occurring "a" loop escape mutations	Cooreman MP, van Roosmalen MH, te Morsche R, Sünnen CM, de Ven EM, Jansen JB, Tytgat GN, de Wit PL, Paulij WP.	Hepatology	1999	Record does not concern coronaviruses
11417821		Characterization of three infectious bronchitis virus isolates from China associated with proventriculus in vaccinated chickens	Yu L, Jiang Y, Low S, Wang Z, Nam SJ, Liu W, Kwangac J.	Avian Dis	2001	Record describes a novel non-attenuated coronavirus
8701580	10.1016/0378-1135(95)00141-7	Characterization of transmissible gastroenteritis coronavirus S protein expression products in avirulent S. typhimurium Δcya Δcrp: Persistence, stability and immune response in swine	Smerdou C., Urniza A., Curtis III R., Enjuanes L.	Veterinary Microbiology	1996	Record concerns coronaviruses but describes neither a novel nor an attenuated coronavirus
8995612	10.1128/jvi.71.2.949-955.1997	Characterization of two temperature-sensitive mutants of coronavirus mouse hepatitis virus strain A59 with maturation defects in the spike protein	Luytjes W., Gerritsma H., Bos E., Spaan W.	Journal of Virology	1997	PASS	The sequence of coronavirus described by the record is not known
32247757	10.1016/j.virusres.2020.197955	Characterization, pathogenicity and protective efficacy of a cell culture-derived porcine deltacoronavirus	Gao X, Zhao D, Zhou P, Zhang L, Li M, Li W, Zhang Y, Wang Y, Liu X.	Virus Res	2020	PASS	Record concerns coronaviruses but describes neither a novel nor an attenuated coronavirus
30205273	10.1016/j.virol.2018.08.022	Characterizing replication kinetics and plaque production of type I feline infectious peritonitis virus in three feline cell lines	O'Brien A., Mettelman R.C., Volk A., André N.M., Whittaker G.R., Baker S.C.	Virology	2018	Record concerns coronaviruses but describes neither a novel nor an attenuated coronavirus
18300071	10.1080/13550280701750635	Chemokine expression during mouse hepatitis virus-induced encephalitis: Contributions of the spike and background genes	Scott E.P., Branigan P.J., Del Vecchio A.M., Weiss S.R.	Journal of NeuroVirology	2008	Record concerns coronaviruses but describes neither a novel nor an attenuated coronavirus
15860669	10.1182/blood-2004-10-4166	Chemokine up-regulation in SARS-coronavirus-infected, monocyte-derived human dendritic cells	Law HK, Cheung CY, Ng HY, Sia SF, Chan YO, Luk W, Nicholls JM, Peiris JS, Lau YL.	Blood	2005	Record concerns coronaviruses but describes neither a novel nor an attenuated coronavirus
3008613		Chicken embryonal vaccination with avian infectious bronchitis virus.	Wakenell P.S., Sharma J.M.	American journal of veterinary research	1986	The sequence of coronavirus described by the record is not known
		Chicken interferon TYPE-1 inhiBits infectious bronchitis virus (ibv) replication	Pei, J; Sekellick, MJ; Marcus, PI; Choi, IS; Collisson, EW	CURRENT PROGRESS ON AVIAN IMMUNOLOGY RESEARCH, PROCEEDINGS	2001	Record concerns coronaviruses but describes neither a novel nor an attenuated coronavirus
11027808	10.1016/S0264-410X(00)00198-5	Chimeric classical swine fever viruses containing envelope protein E(RNS) or E2 of bovine viral diarrhoea virus protect pigs against challenge with CSFV and induce a distinguishable antibody response	Van Gennip H.G.P., Van Rijn P.A., Widjojoatmodjo M.N., De Smit A.J., Moormann R.J.M.	Vaccine	2000	Record concerns coronaviruses but describes neither a novel nor an attenuated coronavirus
24027335	10.1128/JVI.02050-13	Chimeric exchange of coronavirus nsp5 proteases (3CLpro) identifies common and divergent regulatory determinants of protease activity	Stobart C.C., Sexton N.R., Munjal H., Lu X., Molland K.L., Tomar S., Mesecar A.D., Denison M.R.	Journal of Virology	2013	PASS	Record does not describe an in vivo study
24155939	10.1371/journal.pone.0077298	Chimeric Mouse Model for the Infection of Hepatitis B and C Viruses	Tesfaye A., Stift J., Maric D., Cui Q., Dienes H.-P., Feinstone S.M.	PLoS ONE	2013	Record does not concern coronaviruses
33477379	10.3390/v13010122	Chimeric porcine deltacoronaviruses with sparrow coronavirus spike protein or the receptor-binding domain infect pigs but lose virulence and intestinal tropism	Niu X., Hou Y.J., Jung K., Kong F., Saif L.J., Wang Q.	Viruses	2021	PASS	Record describes coronavirus attenuation method that cannot be applied to SARS-CoV-2
	10.12688/WELLCOMEOPENRES.15784.1	Chloroquine/ hydroxychloroquine prevention of coronavirus disease (COVID-19) in the healthcare setting; protocol for a placebo-controlled prophylaxis study (COPCOV)	Schilling W.H., Callery J.J., Taylor W., Mukaka M., Ekkapongpisit M., Watson J.A., Chandna A., Panapipat S., Tubprasert J., Yuentrakul P., Waithira N., Cope T., Dhorda M., Cruz C., von Seidlein L., Milton J., LLewelyn M., Adler A., Chotivanich K., Cheah P.Y., Ashley E.A., Mayxay M., Dondorp A.M., Phumratanaprapin W., Day N.P., White N.	Wellcome Open Research	2021	Record concerns coronaviruses but describes neither a novel nor an attenuated coronavirus
34262047	10.1038/s41467-021-24467-0	Chronic lung diseases are associated with gene expression programs favoring SARS-CoV-2 entry and severity	Bui LT, Winters NI, Chung MI, Joseph C, Gutierrez AJ, Habermann AC, Adams TS, Schupp JC, Poli S, Peter LM, Taylor CJ, Blackburn JB, Richmond BW, Nicholson AG, Rassl D, Wallace WA, Rosas IO, Jenkins RG, Kaminski N, Kropski JA, Banovich NE; Human Cell Atlas Lung Biological Network.	Nat Commun	2021	Record concerns coronaviruses but describes neither a novel nor an attenuated coronavirus
34273051	10.1007/s10072-021-05472-z	Chronic lymphocytic inflammation with pontine perivascular enhancement responsive to steroids (CLIPPERS) after SARS-CoV-2 pneumonia	Montini F., Martinelli V., Sangalli F., Callea M., Anzalone N., Filippi M.	Neurological Sciences	2021	Record concerns coronaviruses but describes neither a novel nor an attenuated coronavirus
6307249		Ciliary activity: a criterion for associating resistance to infectious bronchitis virus infection with ELISA antibody titer	Snyder DB, Marquardt WW, Kadavil SK.	Avian Dis	1983	The sequence of coronavirus described by the record is not known
34480638	10.1007/s00705-021-05227-3	Circulation of three genotypes and identification of unique mutations in neutralizing epitopes of infectious bronchitis virus in chickens in Bangladesh	Parvin R, Begum JA, Nooruzzaman M, Kabiraj CK, Chowdhury EH.	Arch Virol	2021	Record describes a novel non-attenuated coronavirus
20093802	10.1292/jvms.09-0130	Classification of IBV S1 genotypes by direct reverse transcriptase-polymerase chain reaction (RT-PCR) and relationship between serotypes and genotypes of strains isolated between 1998 and 2008 in Japan	Ariyoshi R., Kawai T., Honda T., Tokiyoshi S.	Journal of Veterinary Medical Science	2010	Record describes a novel non-attenuated coronavirus
18400867	10.1128/JVI.00074-08	Cleavage of group 1 coronavirus spike proteins: How furin cleavage is traded off against heparan sulfate binding upon cell culture adaptation	De Haan C.A.M., Haijema B.J., Schellen P., Wichgers Schreur P., Te Lintelo E., Vennema H., Rottier P.J.M.	Journal of Virology	2008	Record describes a novel non-attenuated coronavirus
34423834	10.1093/cid/ciab721	Clinical and virological features of SARS-CoV-2 variants of concern: a retrospective cohort study comparing B.1.1.7 (Alpha), B.1.315 (Beta), and B.1.617.2 (Delta)	Ong SWX, Chiew CJ, Ang LW, Mak TM, Cui L, Toh MPHS, Lim YD, Lee PH, Lee TH, Chia PY, Maurer-Stroh S, Lin RTP, Leo YS, Lee VJ, Lye DC, Young BE.	Clin Infect Dis	2021	Record concerns coronaviruses but describes neither a novel nor an attenuated coronavirus
35143466	10.15585/mmwr.mm7106e2	Clinical Characteristics and Outcomes Among Adults Hospitalized with Laboratory-Confirmed SARS-CoV-2 Infection During Periods of B.1.617.2 (Delta) and B.1.1.529 (Omicron) Variant Predominance - One Hospital, California, July 15-September 23, 2021, and December 21, 2021-January 27, 2022	Modes ME, Directo MP, Melgar M, Johnson LR, Yang H, Chaudhary P, Bartolini S, Kho N, Noble PW, Isonaka S, Chen P.	MMWR Morb Mortal Wkly Rep	2022	Record concerns coronaviruses but describes neither a novel nor an attenuated coronavirus
33256640	10.1186/s12877-020-01921-0	Clinical characteristics on admission predict in-hospital fatal outcome in patients aged ≥75 years with novel coronavirus disease (COVID-19): a retrospective cohort study	Yu Z, Ke Y, Xie J, Yu H, Zhu W, He L, Zheng Q, Li C, Lu J, Li S, Wen S, Wei S, Liu N, Wei L, Bai R.	BMC Geriatr	2020	Record concerns coronaviruses but describes neither a novel nor an attenuated coronavirus
33404401	10.1099/jmm.0.001295	Clinical evaluation of a fully automated, laboratory-developed multiplex RT-PCR assay integrating dual-target SARS-CoV-2 and influenza A/B detection on a high-throughput platform	Nörz D, Hoffmann A, Aepfelbacher M, Pfefferle S, Lütgehetmann M.	J Med Microbiol	2021	Record concerns coronaviruses but describes neither a novel nor an attenuated coronavirus
2537590		Clinical evaluation of transmissible gastroenteritis virus vaccines and vaccination procedures for inducing lactogenic immunity in sows.	Moxley R.A., Olson L.D.	American journal of veterinary research	1989	PASS	Report not retrieved
33002041	10.1371/journal.pone.0239802	Clinical laboratory parameters associated with severe or critical novel coronavirus disease 2019 (COVID-19): A systematic review and meta-analysis	Moutchia J, Pokharel P, Kerri A, McGaw K, Uchai S, Nji M, Goodman M.	PLoS One	2020	Record concerns coronaviruses but describes neither a novel nor an attenuated coronavirus
33690722	10.1371/journal.pone.0248438	Clinical prediction rule for SARS-CoV-2 infection from 116 U.S. emergency departments 2-22-2021	Kline JA, Camargo CA Jr, Courtney DM, Kabrhel C, Nordenholz KE, Aufderheide T, Baugh JJ, Beiser DG, Bennett CL, Bledsoe J, Castillo E, Chisolm-Straker M, Goldberg EM, House H, House S, Jang T, Lim SC, Madsen TE, McCarthy DM, Meltzer A, Moore S, Newgard C, Pagenhardt J, Pettit KL, Pulia MS, Puskarich MA, Southerland LT, Sparks S, Turner-Lawrence D, Vrablik M, Wang A, Weekes AJ, Westafer L, Wilburn…	PLoS One	2021	Record concerns coronaviruses but describes neither a novel nor an attenuated coronavirus
34806440	10.1177/20402066211061063	Clinical severe acute respiratory syndrome coronavirus 2 isolation and antiviral testing	Mathez G., Cagno V.	Antiviral Chemistry and Chemotherapy	2021	Record concerns coronaviruses but describes neither a novel nor an attenuated coronavirus
	10.3390/brainsci11091138	Clinical spectrum and neuroimagistic features in hospitalized patients with neurological disorders and concomitant coronavirus-19 infection	Gogu A.E., Motoc A.G., Stroe A.Z., Docu Axelerad A., Docu Axelerad D., Pârv F., Munteanu G., Dan F., Jianu D.C.	Brain Sciences	2021	Record concerns coronaviruses but describes neither a novel nor an attenuated coronavirus
35126362	10.3389/fimmu.2021.798117	Clinical Utility of Elecsys Anti-SARS-CoV-2 S Assay in COVID-19 Vaccination: An Exploratory Analysis of the mRNA-1273 Phase 1 Trial	Jochum S, Kirste I, Hortsch S, Grunert VP, Legault H, Eichenlaub U, Kashlan B, Pajon R.	Front Immunol	2022	Record concerns coronaviruses but describes neither a novel nor an attenuated coronavirus
32483586	10.1093/jalm/jfaa089	Clinical Validation of a SARS-CoV-2 Real-Time Reverse Transcription PCR Assay Targeting the Nucleocapsid Gene	SoRelle J.A., Frame I., Falcon A., Jacob J., Wagenfuehr J., Mitui M., Park J.Y., Filkins L.	The journal of applied laboratory medicine	2020	Record concerns coronaviruses but describes neither a novel nor an attenuated coronavirus
34376716	10.1038/s41598-021-95607-1	Clinical validation of optimised RT-LAMP for the diagnosis of SARS-CoV-2 infection	Lim B, Ratcliff J, Nawrot DA, Yu Y, Sanghani HR, Hsu CC, Peto L, Evans S, Hodgson SH, Skeva A, Adam M, Panopoulou M, Zois CE, Poncin K, Vasudevan SR, Dai S, Ren S, Chang H, Cui Z, Simmonds P, Huang WE, Andersson MI.	Sci Rep	2021	Record concerns coronaviruses but describes neither a novel nor an attenuated coronavirus
32853988	10.1016/j.ebiom.2020.102960	Clinical, immunological and virological characterization of COVID-19 patients that test re-positive for SARS-CoV-2 by RT-PCR	Lu J, Peng J, Xiong Q, Liu Z, Lin H, Tan X, Kang M, Yuan R, Zeng L, Zhou P, Liang C, Yi L, du Plessis L, Song T, Ma W, Sun J, Pybus OG, Ke C.	EBioMedicine	2020	Record concerns coronaviruses but describes neither a novel nor an attenuated coronavirus
33320842	10.1172/JCI144930	Clinical, laboratory, and temporal predictors of neutralizing antibodies against SARS-CoV-2 among COVID-19 convalescent plasma donor candidates	Boonyaratanakornkit J, Morishima C, Selke S, Zamora D, McGuffin S, Shapiro AE, Campbell VL, McClurkan CL, Jing L, Gross R, Liang J, Postnikova E, Mazur S, Lukin VV, Chaudhary A, Das MK, Fink SL, Bryan A, Greninger AL, Jerome KR, Holbrook MR, Gernsheimer TB, Wener MH, Wald A, Koelle DM.	J Clin Invest	2021	Record concerns coronaviruses but describes neither a novel nor an attenuated coronavirus
25542078	10.1016/j.jns.2014.12.019	Clinically mild encephalitis with a reversible splenial lesion (MERS) after mumps vaccination	Takanashi J.-I., Shiihara T., Hasegawa T., Takayanagi M., Hara M., Okumura A., Mizuguchi M.	Journal of the Neurological Sciences	2015	Record does not concern coronaviruses
9592724	10.1292/jvms.60.495	Cloacal Inoculation with the Connecticut Strain of Avian Infectious Bronchitis Virus: An Attempt to Produce Nephropathogenic Virus by in vivo Passage Using Cloacal Inoculation	Uenaka T., Kishimoto I., Uemura T., Ito T., Umemura T., Otsuki K.	Journal of Veterinary Medical Science	1998	Record describes a novel non-attenuated coronavirus
6874877	10.1016/0166-0934(83)90041-1	Clones of MRC-C cells may be superior to the parent line for the culture of 229E-like strains of human respiratory coronavirus	Phillpotts RJ.	J Virol Methods	1983	Record concerns coronaviruses but describes neither a novel nor an attenuated coronavirus
32214988	10.1007/s11703-010-0001-6	Cloning and expression of the membrane protein gene of TGEV HB06 strain	Zhang X, Zuo Y, Fan J, Liu Y.	Front Agric China	2010	Record concerns coronaviruses but describes neither a novel nor an attenuated coronavirus
17932736	10.1007/s11262-007-0164-2	Cloning and further sequence analysis of the ORF3 gene of wild- and attenuated-type porcine epidemic diarrhea viruses	Park S.-J., Moon H.-J., Luo Y., Kim H.-K., Kim E.-M., Yang J.-S., Song D.-S., Kang B.-K., Lee C.-S., Park B.-K.	Virus Genes	2008	Record describes coronavirus attenuation method that cannot be applied to SARS-CoV-2
17072758	10.1007/s11262-006-0036-1	Cloning and further sequence analysis of the spike gene of attenuated porcine epidemic diarrhea virus DR13	Park S.-J., Song D.-S., Ha G.-W., Park B.-K.	Virus Genes	2007	PASS	Record does not describe an in vivo study
15866725	10.1016/j.pep.2005.02.018	Cloning and sequence analysis of the Korean strain of spike gene of porcine epidemic diarrhea virus and expression of its neutralizing epitope in plants	Kang TJ, Seo JE, Kim DH, Kim TG, Jang YS, Yang MS.	Protein Expr Purif	2005	Record concerns coronaviruses but describes neither a novel nor an attenuated coronavirus
8209725	10.1007/978-1-4615-2996-5_3	Cloning and sequence analysis of the spike gene from several feline coronaviruses	Reed A.P., Klepfer S., Miller T., Jones E.	Advances in Experimental Medicine and Biology	1994	Record concerns coronaviruses but describes neither a novel nor an attenuated coronavirus
12876452	10.1023/a:1024443112717	Cloning and sequence analysis of the spike gene of porcine epidemic diarrhea virus Chinju99	Yeo SG, Hernandez M, Krell PJ, Nagy EE.	Virus Genes	2003	Record concerns coronaviruses but describes neither a novel nor an attenuated coronavirus
8546012	10.1016/0168-1702(95)00046-S	Cloning and sequencing of a 8.4-kb region from the 3′-end of a Taiwanese virulent isolate of the coronavirus transmissible gastroenteritis virus	Chen C.-M., Cavanagh D., Britton P.	Virus Research	1995	Record concerns coronaviruses but describes neither a novel nor an attenuated coronavirus
	10.1007/s13337-013-0132-5	Cloning and sequencing of nucleocapsid (N) gene of an indian isolate of infectious bronchitis virus	Pradhan S.K., Kamble N.M., Aravind S., Gaikwad S.S., Mohan C.M., Dey S., Kataria J.M.	Indian Journal of Virology	2013	Record describes a novel non-attenuated coronavirus
		Cloning, expression, and purification of truncated s1 epitope and peptide CT24 fusion protein of porcine epidemic diarrhea virus in Escherichia coli	Tien N.-Q.-D., Man L.-Q., Ly N.-T., Chi D.-T.-K., Lan T.-T., Huy N.-X.	Plant Cell Biotechnology and Molecular Biology	2019	Record concerns coronaviruses but describes neither a novel nor an attenuated coronavirus
8607285	10.1016/s0168-1702(95)00068-2	Cloning, sequencing and expression of the S protein gene from two geographically distinct strains of canine coronavirus	Horsburgh BC, Brown TD.	Virus Res	1995	Record describes a novel non-attenuated coronavirus
	10.1155/2020/6037893	Cocirculation of Four Infectious Bronchitis Virus Lineages in Broiler Chickens in the Eastern Region of Saudi Arabia from 2012 to 2014	Al-Mubarak A.I.A., Al-Kubati A.A.G.	Veterinary Medicine International	2020	Record describes a novel non-attenuated coronavirus
28755162	10.1007/s12250-017-4021-8	Coexistence of multiple genotypes of porcine epidemic diarrhea virus with novel mutant S genes in the Hubei Province of China in 2016	Zeng Z., Li T.-T., Jin X., Peng F.-H., Song N.-H., Peng G.-Q., Ge X.-Y.	Virologica Sinica	2017	The sequence of coronavirus described by the record is not known
	10.1016/j.gaceta.2021.06.007	Cognitive, ethical, social and political aspects in risk assessment: regarding vaccines against SARS-CoV-2 [Aspectos cognitivos, éticos, sociales y políticos en la evaluación de riesgos: a propósito de las vacunas contra el SARS-CoV-2]	Novoa Jurado A.J., Abellán J.M.	Gaceta Sanitaria	2021	Record concerns coronaviruses but describes neither a novel nor an attenuated coronavirus
18247102	10.1007/s00705-008-0033-x	Coinfection of avian influenza virus (H9N2 subtype) with infectious bronchitis live vaccine	Haghighat-Jahromi M., Asasi K., Nili H., Dadras H., Shooshtari A.H.	Archives of Virology	2008	PASS	The sequence of coronavirus described by the record is not known
33960702	10.1111/tbed.14144	Co-infection of porcine epidemic diarrhoea virus and porcine deltacoronavirus enhances the disease severity in piglets	Zhang H, Han F, Shu X, Li Q, Ding Q, Hao C, Yan X, Xu M, Hu H.	Transbound Emerg Dis	2021	Record concerns coronaviruses but describes neither a novel nor an attenuated coronavirus
31412705	10.1080/03079457.2019.1656328	Co-infections of chickens with avian influenza virus H9N2 and Moroccan Italy 02 infectious bronchitis virus: effect on pathogenesis and protection conferred by different vaccination programmes	Belkasmi S.F.Z., Fellahi S., Touzani C.D., Faraji F.Z., Maaroufi I., Delverdier M., Guérin J.-L., Fihri O.F., El Houadfi M., Ducatez M.F.	Avian Pathology	2020	PASS	The sequence of coronavirus described by the record is not known
33402708	10.1038/s41594-020-00547-5	Cold sensitivity of the SARS-CoV-2 spike ectodomain	Edwards R.J., Mansouri K., Stalls V., Manne K., Watts B., Parks R., Janowska K., Gobeil S.M.C., Kopp M., Li D., Lu X., Mu Z., Deyton M., Oguin T.H., III, Sprenz J., Williams W., Saunders K.O., Montefiori D., Sempowski G.D., Henderson R., Munir Alam S., Haynes B.F., Acharya P.	Nature Structural and Molecular Biology	2021	Record concerns coronaviruses but describes neither a novel nor an attenuated coronavirus
	10.3390/vaccines8040584	Cold-adapted live attenuated sars-cov-2 vaccine completely protects human ace2 transgenic mice from sars-cov-2 infection	Seo S.H., Jang Y.	Vaccines	2020	PASS	PASS
33619473	10.21203/rs.3.rs-200342/v1	Collaboration between the Fab and Fc contribute to maximal protection against SARS-CoV-2 following NVX-CoV2373 subunit vaccine with Matrix-M™ vaccination	Alter G, Gorman M, Patel N, Guebre-Xabier M, Zhu A, Atyeo C, Pullen K, Loos C, Goez-Gazi Y, Carrion R Jr, Tian JH, Yuan D, Bowman K, Zhou B, Maciejewski S, McGrath M, Logue J, Frieman M, Montefiori D, Schendel S, Saphire EO, Lauffenburger D, Greene A, Portnoff A, Massare M, Ellingsworth L, Glenn G, Smith G, Mann C, Amanat F, Krammer F.	Res Sq	2021	Record concerns coronaviruses but describes neither a novel nor an attenuated coronavirus
34278742	10.1002/advs.202101155	Collaborative Equilibrium Coupling of Catalytic DNA Nanostructures Enables Programmable Detection of SARS-CoV-2	Chen Y, Sundah NR, Ho NRY, Natalia A, Liu Y, Miow QH, Wang Y, Beh DLL, Chew KL, Chan D, Tambyah PA, Ong CWM, Shao H.	Adv Sci (Weinh)	2021	Record concerns coronaviruses but describes neither a novel nor an attenuated coronavirus
33424954	10.4209/aaqr.2020.02.0202	Collection of SARS-CoV-2 Virus from the Air of a Clinic Within a University Student Health Care Center and Analyses of the Viral Genomic Sequence	Lednicky JA, Shankar SN, Elbadry MA, Gibson JC, Alam MM, Stephenson CJ, Eiguren-Fernandez A, Morris JG, Mavian CN, Salemi M, Clugston JR, Wu CY.	Aerosol Air Qual Res	2020	Record concerns coronaviruses but describes neither a novel nor an attenuated coronavirus
16424418	10.1378/chest.129.1.95	Colonization of severe acute respiratory syndrome-associated coronavirus among health-care workers screened by nasopharyngeal swab	Ho HT, Chang MS, Wei TY, Hsieh WS, Hung CC, Yang HM, Lu YT.	Chest	2006	Record concerns coronaviruses but describes neither a novel nor an attenuated coronavirus
6290437		Colostral and milk antibody titers in cows vaccinated with a modified live-rotavirus-coronavirus vaccine	Myers L.L., Snodgrass D.R.	Journal of the American Veterinary Medical Association	1982	PASS	Report not retrieved
32538775		Combating sars-cov-2 through lipoxins, proteasome, caveolin and nuclear factor-κb pathways in non-pregnant and pregnant populations	Celik O, Celik N, Aydin S, Baysal B, Aydin S, Saglam A, Gursu Y, Dalkilic S, Ulas M, Ozcil MD, Tayyar AT, Cengiz F, Ugur K, Akkoc RF, Ersahin AA.	Cell Mol Biol (Noisy-le-grand)	2020	Record concerns coronaviruses but describes neither a novel nor an attenuated coronavirus
29976657	10.1128/JVI.00710-18	Combination attenuation offers strategy for live attenuated coronavirus vaccines	Menachery V.D., Gralinski L.E., Mitchell H.D., Dinnon K.H., III, Leist S.R., Yount B.L., Jr., McAnarney E.T., Graham R.L., Waters K.M., Baric R.S.	Journal of Virology	2018	PASS	PASS
28523921	10.4149/av_2017_02_04	Combination of H120 and 1/96 avian infectious bronchitis virus vaccine strains protect chickens against challenge with IS/1494/06 (variant 2)-like infectious bronchitis virus	Habibi M., Karimi V., Langeroudi A.G., Ghafouri S.A., Hashemzadeh M., Farahani R.K., Maghsoudloo H., Abdollahi H., Seifouri P.	Acta Virologica	2017	The sequence of coronavirus described by the record is not known
34911744	10.1136/gutjnl-2021-326312	Combination therapy of infliximab and thiopurines, but not monotherapy with infliximab or vedolizumab, is associated with attenuated IgA and neutralisation responses to SARS-CoV-2 in inflammatory bowel disease	Wellens, J; Edmans, M; Obolski, U; McGregor, CGC; Simmonds, P; Turner, M; Jarvis, L; Skelly, D; Dunachie, S; Barnes, E; Eyre, DW; Colombel, JF; Wong, SY; Klenerman, P; Lindsay, JO; Satsangi, J; Thompson, CP	GUT		Record concerns coronaviruses but describes neither a novel nor an attenuated coronavirus
		Combinatorial RNAi/vaccination therapy for chronic hepatitis B achieves long-term functional cure in preclinical mouse model	Michler T., Kosinska A., Bunse T., Heikenwälder M., Grimm D., Milstein S., Sepp-Lorenzino L., Protzer U.	Journal of Hepatology	2018	Record does not concern coronaviruses
31220864	10.3382/ps/pez207	Combined adjuvant effect of ginseng stem-leaf saponins and selenium on immune responses to a live bivalent vaccine of Newcastle disease virus and infectious bronchitis virus in chickens	Ma X., Bi S., Wang Y., Chi X., Hu S.	Poultry Science	2019	PASS	The sequence of coronavirus described by the record is not known
11852783		Combined vaccine protecting from transmissible swine gastroenteritis	Aliper T.I., Sergeev V.A., Nepoklonov E.A.	Voprosy virusologii	2002	Report not retrieved
11852783		Combined vaccine protecting from transmissible swine gastroenteritis [Kombinirovannaia vaktsina protiv transmissivnogo gastroénterita svinei.]	Aliper T.I., Sergeev V.A., Nepoklonov E.A.	Voprosy Virusologii	2002	PASS	Report not retrieved
30621343	10.3390/v11010031	Combining a Fusion Inhibitory Peptide Targeting the MERS-CoV S2 Protein HR1 Domain and a Neutralizing Antibody Specific for the S1 Protein Receptor-Binding Domain (RBD) Showed Potent Synergism against Pseudotyped MERS-CoV with or without Mutations in RBD	Wang C, Hua C, Xia S, Li W, Lu L, Jiang S.	Viruses	2019	Record concerns coronaviruses but describes neither a novel nor an attenuated coronavirus
33742041	10.1038/s41598-021-85779-1	Combining initial chest CT with clinical variables in differentiating coronavirus disease 2019 (COVID-19) pneumonia from influenza pneumonia	Zhao S, Huang Z, Zeng H, Chen Z, Luo F, Zhang C, Song B.	Sci Rep	2021	Record concerns coronaviruses but describes neither a novel nor an attenuated coronavirus
212410		Comments on transmissible gastroenteritis vaccine	Haelterman E.O.	Journal of the American Veterinary Medical Association	1978	The sequence of coronavirus described by the record is not known
34835069	10.3390/v13112263	Common Laboratory Mice Are Susceptible to Infection with the SARS-CoV-2 Beta Variant	Kant R, Kareinen L, Smura T, Freitag TL, Jha SK, Alitalo K, Meri S, Sironen T, Saksela K, Strandin T, Kipar A, Vapalahti O.	Viruses	2021	Record concerns coronaviruses but describes neither a novel nor an attenuated coronavirus
14592769	10.1016/S0042-6822(03)00511-7	Common RNA replication signals exist among group 2 coronaviruses: Evidence for in vivo recombination between animal and human coronavius molecules	Wu H.-Y., Guy J.S., Yoo D., Vlasak R., Urbach E., Brian D.A.	Virology	2003	Record describes a novel non-attenuated coronavirus
34182162	10.1016/j.jaip.2021.06.019	Common Variable Immunodeficiency Disorders, T-Cell Responses to SARS-CoV-2 Vaccines, and the Risk of Chronic COVID-19	Ameratunga R., Longhurst H., Steele R., Lehnert K., Leung E., Brooks A.E.S., Woon S.-T.	Journal of Allergy and Clinical Immunology: In Practice	2021	Record concerns coronaviruses but describes neither a novel nor an attenuated coronavirus
33621211	10.1172/jci.insight.146242	Comorbid illnesses are associated with altered adaptive immune responses to SARS-CoV-2	Yu KK, Fischinger S, Smith MT, Atyeo C, Cizmeci D, Wolf CR, Layton ED, Logue JK, Aguilar MS, Shuey K, Loos C, Yu J, Franko N, Choi RY, Wald A, Barouch DH, Koelle DM, Lauffenburger D, Chu HY, Alter G, Seshadri C.	JCI Insight	2021	Record concerns coronaviruses but describes neither a novel nor an attenuated coronavirus
23178317	10.1016/j.meegid.2012.09.016	Comparative analysis of four Massachusetts type infectious bronchitis coronavirus genomes reveals a novel Massachusetts type strain and evidence of natural recombination in the genome	Liu X., Shao Y., Ma H., Sun C., Zhang X., Li C., Han Z., Yan B., Kong X., Liu S.	Infection, Genetics and Evolution	2013	Record describes a novel non-attenuated coronavirus
31243124	10.1128/JVI.00714-19	Comparative analysis of gene expression in virulent and attenuated strains of infectious bronchitis virus at subcodon resolution	Dinan A.M., Keep S., Bickerton E., Britton P., Firth A.E., Brierley I.	Journal of Virology	2019	PASS	Record does not describe an in vivo study
32592845	10.1016/j.meegid.2020.104432	Comparative analysis of protein synthesis rate in COVID-19 with other human coronaviruses	Dasari C.M., Bhukya R.	Infection, Genetics and Evolution	2020	Record concerns coronaviruses but describes neither a novel nor an attenuated coronavirus
	10.1080/07391102.2021.1944319	Comparative analysis of SARS-CoV-2 envelope viroporin mutations from COVID-19 deceased and surviving patients revealed implications on its ion-channel activities and correlation with patient mortality	Rizwan T., Kothidar A., Meghwani H., Sharma V., Shobhawat R., Saini R., Vaishnav H.K., Singh V., Pratap M., Sihag H., Kumar S., Dey J.K., Dey S.K.	Journal of Biomolecular Structure and Dynamics	2021	Record concerns coronaviruses but describes neither a novel nor an attenuated coronavirus
19186202	10.1016/j.vaccine.2009.01.021	Comparative analysis of the immunogenicity of SARS-CoV nucleocapsid DNA vaccine administrated with different routes in mouse model	Hu H., Huang X., Tao L., Huang Y., Cui B.-a., Wang H.	Vaccine	2009	Record concerns coronaviruses but describes neither a novel nor an attenuated coronavirus
34452427	10.3390/v13081562	Comparative characterization and pathogenicity of a novel porcine epidemic diarrhea virus (Pedv) with a naturally occurring truncated orf3 gene coinfected with pedvs possessing an intact orf3 gene in piglets	Lu Y., Huang W., Zhong L., Qin Y., Liu X., Yang C., Wang R., Su X., Du C., Mi X., Wang H., He Y., Zhao W., Chen Y., Wei Z., Ouyang K.	Viruses	2021	Record describes coronavirus attenuation method that cannot be applied to SARS-CoV-2
	10.3390/vaccines9121457	Comparative evaluation of immune responses and protection of chitosan nanoparticles and oil-emulsion adjuvants in avian coronavirus inactivated vaccines in chickens	Lopes P.D., Okino C.H., Fernando F.S., Pavani C., Mariguela V.C., Montassier M.F.S., Montassier H.J.	Vaccines	2021	Record concerns coronaviruses but describes neither a novel nor an attenuated coronavirus
26042490		Comparative evaluation of in vitro and in vivo assays for the detection of avian infectious bronchitis virus as a contaminant of live poultry vaccines	Falcone, E; Vignolo, E; Di Trani, L; Puzelli, S; Tollis, M	ATLA-ALTERNATIVES TO LABORATORY ANIMALS	1998	Record concerns coronaviruses but describes neither a novel nor an attenuated coronavirus
22518008	10.1128/CVI.05716-12	Comparative evaluation of two hemagglutinating encephalomyelitis coronavirus vaccine candidates in mice	Chen K, Zhao K, He W, Gao W, Zhao C, Wang L, Pan W, Song D, Wang C, Gao F.	Clin Vaccine Immunol	2012	Record concerns coronaviruses but describes neither a novel nor an attenuated coronavirus
16476986	10.1099/vir.0.81579-0	Comparative evaluation of two severe acute respiratory syndrome (SARS) vaccine candidates in mice challenged with SARS coronavirus	See RH, Zakhartchouk AN, Petric M, Lawrence DJ, Mok CPY, Hogan RJ, Rowe T, Zitzow LA, Karunakaran KP, Hitt MM, Graham FL, Prevec L, Mahony JB, Sharon C, Auperin TC, Rini JM, Tingle AJ, Scheifele DW, Skowronski DM, Patrick DM, Voss TG, Babiuk LA, Gauldie J, Roper RL, Brunham RC, Finlay BB.	J Gen Virol	2006	Record concerns coronaviruses but describes neither a novel nor an attenuated coronavirus
30526618	10.1186/s12917-018-1720-9	Comparative features of infections of two Massachusetts (Mass) infectious bronchitis virus (IBV) variants isolated from Western Canadian layer flocks	Amarasinghe A., De Silva Senapathi U., Abdul-Cader M.S., Popowich S., Marshall F., Cork S.C., Van Der Meer F., Gomis S., Abdul-Careem M.F.	BMC Veterinary Research	2018	PASS	Record describes coronavirus attenuation method that cannot be applied to SARS-CoV-2
12781537	10.1016/s0140-6736(03)13414-9	Comparative full-length genome sequence analysis of 14 SARS coronavirus isolates and common mutations associated with putative origins of infection	Ruan YJ, Wei CL, Ee AL, Vega VB, Thoreau H, Su ST, Chia JM, Ng P, Chiu KP, Lim L, Zhang T, Peng CK, Lin EO, Lee NM, Yee SL, Ng LF, Chee RE, Stanton LW, Long PM, Liu ET.	Lancet	2003	Record concerns coronaviruses but describes neither a novel nor an attenuated coronavirus
32881907	10.1371/journal.pone.0238344	Comparative genome analysis of novel coronavirus (SARS-CoV-2) from different geographical locations and the effect of mutations on major target proteins: An in silico insight	Khan MI, Khan ZA, Baig MH, Ahmad I, Farouk AE, Song YG, Dong JJ.	PLoS One	2020	Record concerns coronaviruses but describes neither a novel nor an attenuated coronavirus
26512689	10.3390/v7102891	Comparative genomic analysis of classical and variant virulent parental/attenuated strains of porcine epidemic diarrhea virus	Chen F., Zhu Y., Wu M., Ku X., Ye S., Li Z., Guo X., He Q.	Viruses	2015	PASS	Record describes coronavirus attenuation method that cannot be applied to SARS-CoV-2
34793437	10.1371/journal.pcbi.1009560	Comparative genomic analysis reveals varying levels of mammalian adaptation to coronavirus infections	King SB, Singh M.	PLoS Comput Biol	2021	Record concerns coronaviruses but describes neither a novel nor an attenuated coronavirus
23202499	10.3390/v4112670	Comparative genomics of Korean infectious bronchitis viruses (IBVs) and an animal model to evaluate pathogenicity of IBVs to the reproductive organs	Hong SM, Kwon HJ, Kim IH, Mo ML, Kim JH.	Viruses	2012	Record concerns coronaviruses but describes neither a novel nor an attenuated coronavirus
28116527	10.1007/s00705-016-3208-x	Comparative genomics of QX-like infectious bronchitis viruses in Korea	Hong S.-M., Kwon H.-J., Choi K.-S., Kim J.-H.	Archives of Virology	2017	Record describes a novel non-attenuated coronavirus
171289	10.1016/0021-9975(75)90128-0	Comparative growth kinetic studies on avian infectious bronchitis virus in different systems	Darbyshire J.H., Cook J.K.A., Peters R.W.	Journal of Comparative Pathology	1975	The sequence of coronavirus described by the record is not known
20570279	10.1016/j.jcpa.2010.04.007	Comparative Histopathology and Immunohistochemistry of QX-like, Massachusetts and 793/B Serotypes of Infectious Bronchitis Virus Infection in Chickens	Benyeda Z., Szeredi L., Mató T., Süveges T., Balka G., Abonyi-Tóth Z., Rusvai M., Palya V.	Journal of Comparative Pathology	2010	The sequence of coronavirus described by the record is not known
34108961	10.3389/fimmu.2021.641447	Comparative Immunomodulatory Evaluation of the Receptor Binding Domain of the SARS-CoV-2 Spike Protein; a Potential Vaccine Candidate Which Imparts Potent Humoral and Th1 Type Immune Response in a Mouse Model	Shrivastava T, Singh B, Rizvi ZA, Verma R, Goswami S, Vishwakarma P, Jakhar K, Sonar S, Mani S, Bhattacharyya S, Awasthi A, Surjit M.	Front Immunol	2021	Record concerns coronaviruses but describes neither a novel nor an attenuated coronavirus
26969241	10.1016/j.meegid.2016.03.006	Comparative molecular epidemiology of two closely related coronaviruses, bovine coronavirus (BCoV) and human coronavirus OC43 (HCoV-OC43), reveals a different evolutionary pattern	Kin N., Miszczak F., Diancourt L., Caro V., Moutou F., Vabret A., Ar Gouilh M.	Infection, Genetics and Evolution	2016	Record does not describe an in vivo study
2840842		Comparative nephropathogenicity of infectious bronchitis virus in bursectomized and nonbursectomized chickens	Chandra M.	Am J Vet Res	1988	Record concerns coronaviruses but describes neither a novel nor an attenuated coronavirus
21533129	10.1371/journal.pone.0018558	Comparative pathogenesis of three human and zoonotic SARS-CoV strains in cynomolgus macaques	Rockx B, Feldmann F, Brining D, Gardner D, LaCasse R, Kercher L, Long D, Rosenke R, Virtaneva K, Sturdevant DE, Porcella SF, Mattoon J, Parnell M, Baric RS, Feldmann H.	PLoS One	2011	Record concerns coronaviruses but describes neither a novel nor an attenuated coronavirus
25939885	10.1016/j.vetmic.2015.04.022	Comparative pathogenesis of US porcine epidemic diarrhea virus (PEDV) strain PC21A in conventional 9-day-old nursing piglets vs. 26-day-old weaned pigs	Jung K, Annamalai T, Lu Z, Saif LJ.	Vet Microbiol	2015	Record concerns coronaviruses but describes neither a novel nor an attenuated coronavirus
33885726	10.1093/bib/bbab144	Comparative phylogenetic analysis of SARS-CoV-2 spike protein-possibility effect on virus spillover	Ghorbani A, Samarfard S, Eskandarzade N, Afsharifar A, Eskandari MH, Niazi A, Izadpanah K, Karbanowicz TP.	Brief Bioinform	2021	Record concerns coronaviruses but describes neither a novel nor an attenuated coronavirus
3038290		Comparative properties of feline coronaviruses in vitro.	McKeirnan A.J., Evermann J.F., Davis E.V., Ott R.L.	Canadian journal of veterinary research = Revue canadienne de recherche veterinaire	1987	Record does not describe an in vivo study
32605292	10.3390/v12070697	Comparative Protective Efficacies of Novel Avian Paramyxovirus-Vectored Vaccines against Virulent Infectious Bronchitis Virus in Chickens	Shirvani E., Samal S.K.	Viruses	2020	Record concerns coronaviruses but describes neither a novel nor an attenuated coronavirus
31607602	10.1016/j.vaccine.2019.09.081	Comparative protective immunity provided by live vaccines of Newcastle disease virus or avian metapneumovirus when co-administered alongside classical and variant strains of infectious bronchitis virus in day-old broiler chicks	Ball C., Forrester A., Herrmann A., Lemiere S., Ganapathy K.	Vaccine	2019	PASS	The sequence of coronavirus described by the record is not known
27916855	10.3390/v8120323	Comparative proteome analysis of porcine jejunum tissues in response to a virulent strain of porcine epidemic diarrhea virus and its attenuated strain	Li Z., Chen F., Ye S., Guo X., Memon A.M., Wu M., He Q.	Viruses	2016	PASS	Record describes coronavirus attenuation method that cannot be applied to SARS-CoV-2
6312956		Comparative serological studies of south Germany field isolates of chicken in infectious bronchitis virus and vaccine strains in tracheal cultures	Locher M., Lohr J.E., Kösters J.	Berliner und Münchener tierärztliche Wochenschrift	1983	Report not retrieved
6312956		Comparative serological studies of south Germany field isolates of chicken in infectious bronchitis virus and vaccine strains in tracheal cultures [Vergleichende serologische Untersuchungen von süddeutschen Feldisolaten des Virus der Infektiösen Bronchitis der Hühner und von Impfstämmen in Trachealkulturen.]	Locher M., Lohr J.E., Kösters J.	Berliner und Munchener Tierarztliche Wochenschrift	1983	The sequence of coronavirus described by the record is not known
		Comparative studies on the effect of aflatoxins types on the immunization of one-day-old broiler chicks simultaneously vaccinated against newcastle disease and infectious bronchitis disease	Hussien A.L., Dahshan M., Hussein A.S., Mohamed Ali A.A.	Life Science Journal	2012	PASS	The sequence of coronavirus described by the record is not known
		Comparative Studies on the Effect of Aflatoxins Types on the Immunization of One-Day-Old Broiler Chicks Simultaneously Vaccinated Against Newcastle Disease and Infectious Bronchitis Disease	Al Hussien, MD; Hussein, AS; Ali, AAM	LIFE SCIENCE JOURNAL-ACTA ZHENGZHOU UNIVERSITY OVERSEAS EDITION	2012	PASS	The sequence of coronavirus described by the record is not known
34889452	10.1093/bfgp/elab041	Comparative studies on the high-performance compression of SARS-CoV-2 genome collections	Tang T, Li J.	Brief Funct Genomics	2021	Record concerns coronaviruses but describes neither a novel nor an attenuated coronavirus
5815857		Comparative studies on the pathogenicity, histo-pathogenesis and immunizing ability of two attenuated strains of avian infectious bronchitis virus	Fritzsche K., Stumpel M., Toucas L., Billon I.	Zentralblatt für Veterinärmedizin. Reihe B. Journal of veterinary medicine. Series B (1969) 16:3 (193-212). Date of Publication: 1969	1969	PASS	Report not retrieved
5511060		COMPARATIVE STUDY OF IMMUNIZING STRENGTH OF ATTENUATED LIVE VACCINES AGAINST INFECTIOUS BRONCHITIS OF POULTRY	METIANU, T; LUCAS, A; BRION, A	REVUE D IMMUNOLOGIE	1970	The sequence of coronavirus described by the record is not known
		Comparative study of phylogenetic analysis of SI gene of infectious bronchitis virus isolates from Iraq with the selected strains (Genebank)	Al-Bawi F., Abady N.R.	Plant Archives	2019	Record describes a novel non-attenuated coronavirus
5511060		Comparative study of the immunizing propery of attenuated liver vaccines against infectious bronchitis of poultry	Metianu T., Lucas A., Brion A.	Revue d'immunologie	1970	The sequence of coronavirus described by the record is not known
5511060		Comparative study of the immunizing propery of attenuated liver vaccines against infectious bronchitis of poultry [Etude comparative du pouvoir immunisant des vaccins vivants atténués contre la bronchite infectieuse des volailles.]	Metianu T., Lucas A., Brion A.	Revue d"immunologie	1970	PASS	Report not retrieved
29174688	10.1016/j.micpath.2017.11.031	Comparative transcriptome analysis reveals induction of apoptosis in chicken kidney cells associated with the virulence of nephropathogenic infectious bronchitis virus	Liu, H; Yang, X; Zhang, ZK; Li, JN; Zou, WC; Zeng, FY; Wang, HN	MICROBIAL PATHOGENESIS	2017	PASS	Record describes coronavirus attenuation method that cannot be applied to SARS-CoV-2
33668405	10.3390/v13020292	Comparative Transcriptome Profiling of Human and Pig Intestinal Epithelial Cells after Porcine Deltacoronavirus Infection	Cruz-Pulido D, Boley PA, Ouma WZ, Alhamo MA, Saif LJ, Kenney SP.	Viruses	2021	Record concerns coronaviruses but describes neither a novel nor an attenuated coronavirus
2992442		Comparative use of direct organ cultures of infected chicken tracheas in isolating avian infectious bronchitis virus	Sawaguchi K, Yachida S, Aoyama S, Takahashi N, Iritani Y, Hayashi Y.	Avian Dis	1985	Record concerns coronaviruses but describes neither a novel nor an attenuated coronavirus
34049240	10.1016/j.ebiom.2021.103403	Comparing infectivity and virulence of emerging SARS-CoV-2 variants in Syrian hamsters	Abdelnabi R, Boudewijns R, Foo CS, Seldeslachts L, Sanchez-Felipe L, Zhang X, Delang L, Maes P, Kaptein SJF, Weynand B, Vande Velde G, Neyts J, Dallmeier K.	EBioMedicine	2021	Record describes a novel non-attenuated coronavirus
	10.3390/vaccines9060588	Comparison and analysis of neutralizing antibody levels in serum after inoculating with sars-cov-2, mers-cov, or sars-cov vaccines in humans	Yu S., Chen K., Fang L., Mao H., Lou X., Li C., Zhang Y.	Vaccines	2021	Record concerns coronaviruses but describes neither a novel nor an attenuated coronavirus
26802454	10.1016/j.jviromet.2016.01.008	Comparison between dot-immunoblotting assay and clinical sign determination method for quantifying avian infectious bronchitis virus vaccine by titration in embryonated eggs	Yuk S.-S., Kwon J.-H., Noh J.-Y., Hong W.-T., Gwon G.-B., Jeong J.-H., Jeong S., Youn H.-N., Heo Y.-H., Lee J.-B., Park S.-Y., Choi I.-S., Song C.-S.	Journal of Virological Methods	2016	Record describes a novel non-attenuated coronavirus
15994050	10.1016/j.diagmicrobio.2005.03.007	Comparison of 9 different PCR primers for the rapid detection of severe acute respiratory syndrome coronavirus using 2 RNA extraction methods	Chui L, Drebot M, Andonov A, Petrich A, Glushek M, Mahony J.	Diagn Microbiol Infect Dis	2005	Record concerns coronaviruses but describes neither a novel nor an attenuated coronavirus
6347166	10.1111/j.1751-0813.1983.tb05909.x	Comparison of a microneutralisation test with ELISA and precipitin tests for detection of antibodies to infectious bronchitis virus in chickens	Wilcox GE, Nandapalan N, Flower RL, Fry-Smith D.	Aust Vet J	1983	Record concerns coronaviruses but describes neither a novel nor an attenuated coronavirus
6268048	10.2307/1589833	Comparison of a tissue-culture virus-neutralization test and the enzyme-linked immunosorbent assay for measurement of antibodies t infectious bronchitis.	Garcia Z., Bankowski R.A.	Avian diseases	1981	Record concerns coronaviruses but describes neither a novel nor an attenuated coronavirus
34633612	10.1007/s11357-021-00471-6	Comparison of antibody and T cell responses elicited by BBIBP-CorV (Sinopharm) and BNT162b2 (Pfizer-BioNTech) vaccines against SARS-CoV-2 in healthy adult humans	Vályi-Nagy I., Matula Z., Gönczi M., Tasnády S., Bekő G., Réti M., Ajzner É., Uher F.	GeroScience	2021	Record concerns coronaviruses but describes neither a novel nor an attenuated coronavirus
		Comparison of antigenic activity of two toga viruses: swine fever and bovine viral diarrhea viruses [ACTIVITE ANTIGENIQUE COMPAREE DE DEUX TOGAVIRUS: LE VIRUS DE LA PESTE PORCINE ET LE VIRUS DE LA MALADIE DES MUQUEUSES]	Corthier G., Aynaud J.M., Galicher Ch., Gelfi J.	Annales de Recherches Veterinaires	1974	Record does not concern coronaviruses
2053295	10.1016/0042-6822(91)90163-6	Comparison of bovine coronavirus (BCV) antigens: Monoclonal antibodies to the spike glycoprotein distinguish between vaccine and wild-type strains	Hussain K.A., Storz J., Kousoulas K.G.	Virology	1991	Record does not describe an in vivo study
7730812	10.1099/0022-1317-76-5-1263	COMPARISON OF BOVINE CORONAVIRUS ISOLATES ASSOCIATED WITH NEONATAL CALF DIARRHEA AND WINTER DYSENTERY IN ADULT DAIRY-CATTLE IN QUEBEC	DEA, S; MICHAUD, L; MILANE, G	JOURNAL OF GENERAL VIROLOGY	1995	Record describes a novel non-attenuated coronavirus
6297448		Comparison of ciliary activity and virus recovery from tracheas of chickens and humoral immunity after inoculation with serotypes of avian infectious bronchitis virus	Marquardt WW, Kadavil SK, Snyder DB.	Avian Dis	1982	Record concerns coronaviruses but describes neither a novel nor an attenuated coronavirus
	10.1016/j.clinimag.2021.06.036	Comparison of deep learning, radiomics and subjective assessment of chest CT findings in SARS-CoV-2 pneumonia	Arru C., Ebrahimian S., Falaschi Z., Hansen J.V., Pasche A., Lyhne M.D., Zimmermann M., Durlak F., Mitschke M., Carriero A., Nielsen-Kudsk J.E., Kalra M.K., Saba L.	Clinical Imaging	2021	Record concerns coronaviruses but describes neither a novel nor an attenuated coronavirus
34549995	10.1128/Spectrum.00178-21	Comparison of Dried Blood Spots and Venous Blood for the Detection of SARS-CoV-2 Antibodies in a Population of Nursing Home Residents	Meyers E, Heytens S, Formukong A, Vercruysse H, De Sutter A, Geens T, Hofkens K, Janssens H, Nys E, Padalko E, Deschepper E, Cools P.	Microbiol Spectr	2021	Record concerns coronaviruses but describes neither a novel nor an attenuated coronavirus
229532	10.1016/s0034-5288(18)32889-3	Comparison of duration of immunity in chickens infected with a live infectious bronchitis vaccine by three different routes	Gough R.E., Alexander D.J.	Research in Veterinary Science	1979	The sequence of coronavirus described by the record is not known
15183070	10.1016/j.virol.2004.03.032	Comparison of four regions in the replicase gene of heterologous infectious bronchitis virus strains	Mondal SP, Cardona CJ.	Virology	2004	Record describes a novel non-attenuated coronavirus
1642550	10.1007/BF01309637	Comparison of hemagglutinating, receptor-destroying, and acetylesterase activities of avirulent and virulent bovine coronavirus strains	Storz J., Zhang X.M., Rott R.	Archives of Virology	1992	Record concerns coronaviruses but describes neither a novel nor an attenuated coronavirus
34066389	10.3390/antibiotics10050535	Comparison of Immunological Profiles of SARS-CoV-2 Variants in the COVID-19 Pandemic Trends: An Immunoinformatics Approach	Mallavarpu Ambrose J, Priya Veeraraghavan V, Kullappan M, Chellapandiyan P, Krishna Mohan S, Manivel VA.	Antibiotics (Basel)	2021	Record concerns coronaviruses but describes neither a novel nor an attenuated coronavirus
201184		Comparison of intestinal (Illinois strain) and cell culture-adapted (M-HP strain) viral populations of transmissible gastroenteritis of swine.	Morilla A., Ritchie A.E., Sprino P., Ristic M.	American Journal of Veterinary Research	1977	Record does not describe an in vivo study
		Comparison of laboratory mouse strains for evaluation of hepatitis E vaccine	Su Y., Lin H.-J., Sun G., Li Y.-Y., Jiang W., Wu X., Liang Z.-L.	Chinese Journal of Biologicals	2017	Record does not concern coronaviruses
33339741	10.1016/j.jcjd.2020.10.014	Comparison of Mortality Rate and Severity of Pulmonary Involvement in Coronavirus Disease-2019 Adult Patients With and Without Type 2 Diabetes: A Cohort Study	Khalili S., Moradi O., Kharazmi A.B., Raoufi M., Sistanizad M., Shariat M.	Canadian Journal of Diabetes	2021	Record concerns coronaviruses but describes neither a novel nor an attenuated coronavirus
6277284	10.1007/BF01320795	Comparison of mouse hepatitis virus strains for pathogenicity in weanling mice infected by various routes	Hirano N, Murakami T, Taguchi F, Fujiwara K, Matumoto M.	Arch Virol	1981	PASS	Record describes coronavirus attenuation method that cannot be applied to SARS-CoV-2
1684		Comparison of properties between virulent and attenuated strains of transmissible gastroenteritis virus.	Furuuchi S., Shimizu Y., Kumagai T.	National Institute of Animal Health quarterly	1975	PASS	Report not retrieved
2851952		Comparison of serologic assays for measurement of antibody response to coronavirus in cats.	Ingersoll J.D., Wylie D.E.	American journal of veterinary research	1988	Record concerns coronaviruses but describes neither a novel nor an attenuated coronavirus
	10.1016/0378-1135(77)90040-2	Comparison of serological tests for the measurement of the primary immune response to avian infectious bronchitis virus vaccines	Gough R.E., Alexander D.J.	Veterinary Microbiology	1977	The sequence of coronavirus described by the record is not known
25415042	10.1080/01652176.2014.979512	Comparison of serum neutralization and enzyme-linked immunosorbent assay on sera from porcine epidemic diarrhea virus vaccinated pigs	Paudel S., Park J.E., Jang H., Shin H.J.	Veterinary Quarterly	2014	Record concerns coronaviruses but describes neither a novel nor an attenuated coronavirus
32404529	10.1128/JVI.00831-20	Comparison of Severe Acute Respiratory Syndrome Coronavirus 2 Spike Protein Binding to ACE2 Receptors from Human, Pets, Farm Animals, and Putative Intermediate Hosts	Zhai X, Sun J, Yan Z, Zhang J, Zhao J, Zhao Z, Gao Q, He WT, Veit M, Su S.	J Virol	2020	Record concerns coronaviruses but describes neither a novel nor an attenuated coronavirus
6300130	10.1016/S0092-1157(83)80048-1	Comparison of techniques for the detection of avian infectious bronchitis virus as a contaminant of vaccines	Nicholas R.A.J., Wood G.W., Thornton D.H.	Journal of Biological Standardization	1983	Record concerns coronaviruses but describes neither a novel nor an attenuated coronavirus
1315491		Comparison of the antibody response to transmissible gastroenteritis virus and porcine respiratory coronavirus, using monoclonal antibodies to antigenic sites A and X of the S glycoprotein.	van Nieuwstadt A.P., Boonstra J.	American journal of veterinary research	1992	PASS	Report not retrieved
1315491		COMPARISON OF THE ANTIBODY-RESPONSE TO TRANSMISSIBLE GASTROENTERITIS VIRUS AND PORCINE RESPIRATORY CORONAVIRUS, USING MONOCLONAL-ANTIBODIES TO ANTIGENIC SITE-A AND SITE-X OF THE S-GLYCOPROTEIN	VANNIEUWSTADT, AP; BOONSTRA, J	AMERICAN JOURNAL OF VETERINARY RESEARCH	1992	Report not retrieved
34960185	10.3390/vaccines9121439	Comparison of the Development of SARS-Coronavirus-2-Specific Cellular Immunity, and Central Memory CD4+ T-Cell Responses Following Infection versus Vaccination	Dennehy, KM; Loll, E; Dhillon, C; Classen, JM; Warm, TD; Schuierer, L; Hyhlik-Durr, A; Rommele, C; Gosslau, Y; Kling, E; Hoffmann, R	VACCINES	2021	Record concerns coronaviruses but describes neither a novel nor an attenuated coronavirus
	10.1080/03079458508436243	Comparison of the enzyme-linked immunosorbent assay (elisa), haemagglutination inhibition test and agar gel precipitation test for detection of antibodies to avian infectious bronchitis virus	Monreal G., Bauer H.J., Wiegmann J.	Avian Pathology	1985	PASS	The sequence of coronavirus described by the record is not known
18766638	10.1080/03079458708436399	Comparison of the haemagglutination inhibition test and the serum neutralisation test in tracheal organ cultures for typing infectious bronchitis virus strains	Cook JK, Brown AJ, Bracewell CD.	Avian Pathol	1987	Record concerns coronaviruses but describes neither a novel nor an attenuated coronavirus
10494432	10.2307/1592661	Comparison of the immunofluorescent assay and reverse transcription-polymerase chain reaction to detect and type infectious bronchitis virus	Wang C., Miguel B., Austin F.W., Keirs R.W.	Avian Diseases	1999	Record concerns coronaviruses but describes neither a novel nor an attenuated coronavirus
3021097	10.2307/1590408	Comparison of the nephropathogenicity of four strains of infectious bronchitis virus.	Albassam M.A., Winterfield R.W., Thacker H.L.	Avian diseases	1986	Record describes a novel non-attenuated coronavirus
2053289	10.1016/0042-6822(91)90154-4	Comparison of the nucleotide and deduced amino acid sequences of the S genes specified by virulent and avirulent strains of bovine coronaviruses	Zhang X., Kousoulas K.G., Storz J.	Virology	1991	The sequence of coronavirus described by the record is not known
10551452		Comparison of the pathogenicity in rats of rat coronaviruses of different neutralization groups	Compton S.R., Smith A.L., Gaertner D.J.	Laboratory Animal Science	1999	Record describes a novel non-attenuated coronavirus
8129626	10.1007/BF01310579	Comparison of the S genes and the biological properties of respiratory and enteropathogenic bovine coronaviruses	Zhang X., Herbst W., Kousoulas K.G., Storz J.	Archives of Virology	1994	Record does not describe an in vivo study
7948371	10.1292/jvms.56.449	Comparison of the Susceptibility of Chicks of Different Ages to Infection with Nephrosis/Nephritis-Causing Strain of Infectious Bronchitis Virus	Animas S.B.	Journal of Veterinary Medical Science	1994	Record describes a novel non-attenuated coronavirus
18679958	10.1080/03079459008418700	Comparison of the susceptibility to avian infectious bronchitis virus infection of two inbred lines of white leghorn chickens	Otsuki K, Huggins MB, Cook JK.	Avian Pathol	1990	Record concerns coronaviruses but describes neither a novel nor an attenuated coronavirus
2833531	10.1128/jcm.26.3.573-575.1988	Comparison of Track XI fluorometric immunoassay with Bio-EnzaBead enzyme-linked immunosorbent assay for detection of serum antibody to mouse hepatitis virus	La Regina M.C., Lonigro J., Woods L., Hall W.C., Doyle R.E.	Journal of Clinical Microbiology	1988	Record concerns coronaviruses but describes neither a novel nor an attenuated coronavirus
33073694	10.1080/22221751.2020.1838955	Comparison of transgenic and adenovirus hACE2 mouse models for SARS-CoV-2 infection	Rathnasinghe R, Strohmeier S, Amanat F, Gillespie VL, Krammer F, García-Sastre A, Coughlan L, Schotsaert M, Uccellini MB.	Emerg Microbes Infect	2020	Record concerns coronaviruses but describes neither a novel nor an attenuated coronavirus
2854707		Comparison of two methods for detection of transmissible gastroenteritis virus in feces of pigs with experimentally induced infection.	van Nieuwstadt A.P., Cornelissen J.B., Zetstra T.	American journal of veterinary research	1988	Record concerns coronaviruses but describes neither a novel nor an attenuated coronavirus
24758121	10.1637/10609-070613-Reg.1	Comparison of vaccine subpopulation selection, viral loads, vaccine virus persistence in trachea and cloaca, and mucosal antibody responses after vaccination with two different Arkansas Delmarva poultry industry-derived infectious bronchitis virus vaccines	Ndegwa E.N., Toro H., Van Santen V.L.	Avian Diseases	2014	PASS	The sequence of coronavirus described by the record is not known
35061975	10.1080/21645515.2021.2016201	Comparison of Wild Type DNA Sequence of Spike Protein from SARS-CoV-2 with Optimized Sequence on The Induction of Protective Responses Against SARS-Cov-2 Challenge in Mouse Model	Jiang S, Wu S, Zhao G, He Y, Bao L, Liu J, Qin C, Hou J, Ding Y, Cheng A, Jiang B, Wu J, Yan J, Humeau L, Patella A, Weiner DB, Broderick K, Wang B.	Hum Vaccin Immunother	2022	Record concerns coronaviruses but describes neither a novel nor an attenuated coronavirus
15019237	10.1016/j.virusres.2003.11.016	Comparisons of envelope through 5B sequences of infectious bronchitis coronaviruses indicates recombination occurs in the envelope and membrane genes	Brooks J.E., Rainer A.C., Parr R.L., Woolcock P., Hoerr F., Collisson E.W.	Virus Research	2004	Record describes a novel non-attenuated coronavirus
2164385	10.2307/1591406	Comparisons of the genomic RNA of Arkansas DPI embryonic passages 10 and 100, Australian T, and Massachusetts 41 strains of infectious bronchitis virus.	Butcher G.D., Gelb Jr. J., Collisson E.W.	Avian diseases	1990	PASS	The sequence of coronavirus described by the record is not known
8381626		Competition ELISA, using monoclonal antibodies to the transmissible gastroenteritis virus (TGEV) S protein, for serologic differentiation of pigs infected with TGEV or porcine respiratory coronavirus.	Simkins R.A., Weilnau P.A., Van Cott J., Brim T.A., Saif L.J.	American journal of veterinary research	1993	The sequence of coronavirus described by the record is not known
30301856	10.1128/mBio.01753-18	Complement Activation Contributes to Severe Acute Respiratory Syndrome Coronavirus Pathogenesis	Gralinski LE, Sheahan TP, Morrison TE, Menachery VD, Jensen K, Leist SR, Whitmore A, Heise MT, Baric RS.	mBio	2018	Record concerns coronaviruses but describes neither a novel nor an attenuated coronavirus
33444818	10.1016/j.jcmgh.2021.01.001	Complement-5 Inhibition Deters Progression of Fulminant Hepatitis to Acute Liver Failure in Murine Models	Kusakabe J., Hata K., Miyauchi H., Tajima T., Wang Y., Tamaki I., Kawasoe J., Okamura Y., Zhao X., Okamoto T., Tsuruyama T., Uemoto S.	Cellular and Molecular Gastroenterology and Hepatology	2021	Record concerns coronaviruses but describes neither a novel nor an attenuated coronavirus
27440883	10.1128/JVI.01030-16	Complementary effects of interleukin-15 and alpha interferon induce immunity in hepatitis B virus transgenic mice	Di Scala M., Otano I., Gil-Fariña I., Vanrell L., Hommel M., Olagüe C., Vales A., Galarraga M., Guembe L., de Solorzano C.O., Ghosh I., Maini M.K., Prieto J., González-Aseguinolaza G.	Journal of Virology	2016	Record concerns coronaviruses but describes neither a novel nor an attenuated coronavirus
30159377	10.1007/s13337-018-0462-4	Complete genome analysis of Iranian IS-1494 like avian infectious bronchitis virus	Mousavi FS, Ghalyanchilangeroudi A, Hosseini H, Nayeri Fasaei B, Ghafouri SA, Abdollahi H, Fallah-Mehrabadi MH, Sadri N.	Virusdisease	2018	Record describes a novel non-attenuated coronavirus
	10.1128/genomeA.00201-17	Complete genome of Avian coronavirus vaccine strains Ma5 and BR-I	Brandão P.E., Taniwaki S.A., Berg M., Hora A.S.	Genome Announcements	2017	Record does not describe an in vivo study
20652731	10.1007/s11262-010-0517-0	Complete genome sequence and recombination analysis of infectious bronchitis virus attenuated vaccine strain H120	Zhang Y., Wang H.-N., Wang T., Fan W.-Q., Zhang A.-Y., Wei K., Tian G.-B., Yang X.	Virus Genes	2010	The sequence of coronavirus described by the record is not known
	10.1128/genomeA.01135-16	Complete genome sequence of a Brazil-type Avian coronavirus detected in a chicken	Brandão P.E., Ayres G.R.R., Torres C.A., Villarreal L.Y.B., Hora A.S., Taniwaki S.A.	Genome Announcements	2016	Record describes a novel non-attenuated coronavirus
21980030	10.1128/JVI.06024-11	Complete genome sequence of a Chinese virulent porcine epidemic diarrhea virus strain	Chen J, Wang C, Shi H, Qiu HJ, Liu S, Shi D, Zhang X, Feng L.	J Virol	2011	Record describes a novel non-attenuated coronavirus
24682939	10.1007/s11262-014-1063-y	Complete genome sequence of a novel infectious bronchitis virus strain circulating in China with a distinct S gene	Zhou S., Tang M., Jiang Y., Chen X., Shen X., Li J., Dai Y., Zou J.	Virus Genes	2014	Record describes a novel non-attenuated coronavirus
23599287	10.1128/genomeA.00105-13	Complete genome sequence of a recombinant porcine epidemic diarrhea virus strain from eastern china	Li B, Liu H, He K, Guo R, Ni Y, Du L, Wen L, Zhang X, Yu Z, Zhou J, Mao A, Lv L, Hu Y, Yu Y, Zhu H, Wang X.	Genome Announc	2013	Record describes a novel non-attenuated coronavirus
	10.1128/genomeA.01590-17	Complete genome sequence of a recombinant porcine epidemic diarrhea virus strain, CH/ JXJA/2017, isolated in Jiangxi, China, in 2017	Li K., Song D., Zhang F., Gong W., Guo N., Li A., Zhou X., Huang D., Ye Y., Tang Y.	Genome Announcements	2018	Record describes a novel non-attenuated coronavirus
23166259	10.1128/JVI.02674-12	Complete genome sequence of a vero cell-adapted isolate of porcine epidemic diarrhea virus in eastern China	Zhao M., Sun Z., Zhang Y., Wang G., Wang H., Yang F., Tian F., Jiang S.	Journal of Virology	2012	Record describes a novel non-attenuated coronavirus
24744324	10.1128/genomeA.00165-14	Complete Genome Sequence of CHYJ130330, a Highly Virulent Strain of Porcine Epidemic Diarrhea Virus in South China	Jia A, Feng X, Liu Q, Zhou R, Wang G.	Genome Announc	2014	Record describes a novel non-attenuated coronavirus
27389267	10.1128/genomeA.00619-16	Complete Genome Sequence of Porcine Epidemic Diarrhea Virus from an Outbreak in a Vaccinated Farm in Shandong, China	Gao X, Li D, Zhao J, Xu F, Ge X, Guo X, Han J, Yang H, Zhou L.	Genome Announc	2016	Record describes a novel non-attenuated coronavirus
22532530	10.1128/JVI.00557-12	Complete genome sequences of a Korean virulent porcine epidemic diarrhea virus and its attenuated counterpart	Park S.-J., Kim H.-K., Song D.-S., An D.-J., Park B.-K.	Journal of Virology	2012	PASS	Record does not describe an in vivo study
	10.1128/genomeA.01200-16	Complete genome sequences of porcine epidemic diarrhea virus strains JSLS-1/2015 and JS-2/2015 isolated from China	Tao J., Li B., Zhang C., Liu H.	Genome Announcements	2016	Record describes a novel non-attenuated coronavirus
28495648	10.1016/j.meegid.2017.05.006	Complete genome sequences of two avian infectious bronchitis viruses isolated in Egypt: Evidence for genetic drift and genetic recombination in the circulating viruses	Abozeid H.H., Paldurai A., Khattar S.K., Afifi M.A., El-Kady M.F., El-Deeb A.H., Samal S.K.	Infection, Genetics and Evolution	2017	Record describes a novel non-attenuated coronavirus
20960296	10.1007/s12250-010-3108-2	Complete genomic sequence of transmissible gastroenteritis virus TS and 3′ end sequence characterization following cell culture	Li J.-Q., Cheng J., Lan X., Li X.-R., Li W., Yin X.-P., Li B.-Y., Yang B., Li Z.-Y., Zhang Y., Liu J.-X.	Virologica Sinica	2010	PASS	Record describes a novel non-attenuated coronavirus
17023013	10.1016/j.virol.2006.08.051	Complete genomic sequences, a key residue in the spike protein and deletions in nonstructural protein 3b of US strains of the virulent and attenuated coronaviruses, transmissible gastroenteritis virus and porcine respiratory coronavirus	Zhang X., Hasoksuz M., Spiro D., Halpin R., Wang S., Stollar S., Janies D., Hadya N., Tang Y., Ghedin E., Saif L.	Virology	2007	Record describes coronavirus attenuation method that cannot be applied to SARS-CoV-2
15187369	10.1292/jvms.66.555	Complete nucleotide sequences of S1 and N genes of infectious bronchitis virus isolated in Japan and Taiwan	Shieh H.K., Shien J.-H., Chou H.-Y., Shimizu Y., Chen J.-N., Chang P.-C.	Journal of Veterinary Medical Science	2004	The sequence of coronavirus described by the record is not known
23576515	10.1128/JVI.00087-13	Complete protection against severe acute respiratory syndrome coronavirus-mediated lethal respiratory disease in aged mice by immunization with a mouse-adapted virus lacking E protein	Fett C., DeDiego M.L., Regla-Nava J.A., Enjuanes L., Perlman S.	Journal of Virology	2013	PASS	PASS
33464421	10.1007/s00705-020-04911-0	Comprehensive analysis of genomic diversity of SARS-CoV-2 in different geographic regions of India: an endeavour to classify Indian SARS-CoV-2 strains on the basis of co-existing mutations	Sarkar R, Mitra S, Chandra P, Saha P, Banerjee A, Dutta S, Chawla-Sarkar M.	Arch Virol	2021	Record concerns coronaviruses but describes neither a novel nor an attenuated coronavirus
32954666	10.1111/tbed.13834	Comprehensive annotations of the mutational spectra of SARS-CoV-2 spike protein: a fast and accurate pipeline	Rahman M.S., Islam M.R., Hoque M.N., Alam A.S.M.R.U., Akther M., Puspo J.A., Akter S., Anwar A., Sultana M., Hossain M.A.	Transboundary and Emerging Diseases	2021	Record deals with coronavirus attenuation in only theoretical aspects
	10.3389/fmicb.2021.698365	Comprehensive Deep Mutational Scanning Reveals the Immune-Escaping Hotspots of SARS-CoV-2 Receptor-Binding Domain Targeting Neutralizing Antibodies	Tsai K.-C., Lee Y.-C., Tseng T.-S.	Frontiers in Microbiology	2021	Record concerns coronaviruses but describes neither a novel nor an attenuated coronavirus
32680422	10.1021/acs.bioconjchem.0c00323	Comprehensive Review on Current Interventions, Diagnostics, and Nanotechnology Perspectives against SARS-CoV-2	Chauhan D.S., Prasad R., Srivastava R., Jaggi M., Chauhan S.C., Yallapu M.M.	Bioconjugate Chemistry	2020	Record is a review on coronavirus attenuation
33207184	10.1016/j.cell.2020.10.052	Compromised Humoral Functional Evolution Tracks with SARS-CoV-2 Mortality	Zohar T., Loos C., Fischinger S., Atyeo C., Wang C., Slein M.D., Burke J., Yu J., Feldman J., Hauser B.M., Caradonna T., Schmidt A.G., Cai Y., Streeck H., Ryan E.T., Barouch D.H., Charles R.C., Lauffenburger D.A., Alter G.	Cell	2020	Record concerns coronaviruses but describes neither a novel nor an attenuated coronavirus
	10.1016/j.imu.2022.100845	Computational construction of a glycoprotein multi-epitope subunit vaccine candidate for old and new South-African SARS-CoV-2 virus strains	Oluwagbemi O.O., Oladipo E.K., Dairo E.O., Ayeni A.E., Irewolede B.A., Jimah E.M., Oyewole M.P., Olawale B.M., Adegoke H.M., Ogunleye A.J.	Informatics in Medicine Unlocked	2022	Record concerns coronaviruses but describes neither a novel nor an attenuated coronavirus
35011458	10.3390/molecules27010223	Computational study of sars-cov-2 rna dependent rna polymerase allosteric site inhibition	Faisal S., Lal Badshah S., Kubra B., Sharaf M., Emwas A.-H., Jaremko M., Abdalla M.	Molecules	2022	Record concerns coronaviruses but describes neither a novel nor an attenuated coronavirus
35142523	10.1021/acs.jproteome.2c00001	Computational, Experimental, and Clinical Evidence of a Specific but Peculiar Evolutionary Nature of (COVID-19) SARS-CoV-2	Goh GK, Dunker AK, Foster JA, Uversky VN.	J Proteome Res	2022	Record is a review on coronavirus attenuation
25258490	10.6026/97320630010533	Computer aided prediction and identification of potential epitopes in the receptor binding domain (RBD) of spike (S) glycoprotein of MERS-CoV	Ali MT, Morshed MM, Gazi MA, Musa MA, Kibria MG, Uddin MJ, Khan MA, Hasan S.	Bioinformation	2014	Record concerns coronaviruses but describes neither a novel nor an attenuated coronavirus
32979405	10.1016/j.jviromet.2020.113977	Concentration of infectious SARS-CoV-2 by polyethylene glycol precipitation	Alexander MR, Rootes CL, van Vuren PJ, Stewart CR.	J Virol Methods	2020	Record concerns coronaviruses but describes neither a novel nor an attenuated coronavirus
		Conference report - II. Investigating new vaccines: SARS	Armandola E.	MedGenMed Medscape General Medicine	2003	Record is a review on coronavirus attenuation
14745373		Conference report - II. Investigating new vaccines: SARS. Highlights from the Viral Vaccine Meeting; October 25-28, 2003; Barcelona, Spain.	Armandola E.	MedGenMed : Medscape general medicine	2003	PASS	Report not retrieved
12502799	10.1128/jvi.77.2.830-840.2003	Conformational changes in the spike glycoprotein of murine coronavirus are induced at 37 degrees C either by soluble murine CEACAM1 receptors or by pH 8	Zelus BD, Schickli JH, Blau DM, Weiss SR, Holmes KV.	J Virol	2003	Record concerns coronaviruses but describes neither a novel nor an attenuated coronavirus
	10.1021/acsomega.1c03055	Conformational Variability Correlation Prediction of Transmissibility and Neutralization Escape Ability for Multiple Mutation SARS-CoV-2 Strains using SSSCPreds	Izumi H., Nafie L.A., Dukor R.K.	ACS Omega	2021	Record concerns coronaviruses but describes neither a novel nor an attenuated coronavirus
34035902	10.12688/f1000research.23480.1	Confronting Covid-19 by exploring the possibility of vaccinating with live SARS-CoV-2 virus itself, via a route that would reduce the incidence of pulmonary complications	Joly E.	F1000Research	2020	Record is a review on coronavirus attenuation
33972373	10.4049/jimmunol.2100195	Conserved and Novel Mouse CD8 T Cell Epitopes within SARS-CoV-2 Spike Receptor Binding Domain Protein Identified following Subunit Vaccination	Davenport BJ, Morrison TE, Kedl RM, Klarquist J.	J Immunol	2021	Record concerns coronaviruses but describes neither a novel nor an attenuated coronavirus
33239366	10.1128/mSphere.00754-20	Conserved Genomic Terminals of SARS-CoV-2 as Coevolving Functional Elements and Potential Therapeutic Targets	Chan AP, Choi Y, Schork NJ.	mSphere	2020	Record concerns coronaviruses but describes neither a novel nor an attenuated coronavirus
21529121	10.1139/w11-027	Construction and characterization of Lactobacillus pentosus expressing the D antigenic site of the spike protein of Transmissible gastroenteritis virus	Di-Qiu L, Xin-Yuan Q, Jun-Wei G, Li-Jie T, Yan-Ping J, Yi-Jing L.	Can J Microbiol	2011	Record concerns coronaviruses but describes neither a novel nor an attenuated coronavirus
		Construction and expression of recombinant plasmids containing nephropathogenic IBV S1 gene and li-key segment of chicken major histocompatibility complex II gene	Leghari R.A., Fan B., Bai J., Wen C., Abro S.H., Jiang P.	Journal of Animal and Plant Sciences	2015	Record concerns coronaviruses but describes neither a novel nor an attenuated coronavirus
21331887	10.1007/s12250-011-3145-x	Construction and genetic analysis of murine hepatitis virus strain A59 Nsp16 temperature sensitive mutant and the revertant virus	Chang G.-H., Luo B.-J., Lu P., Lin L., Wu X.-Y., Li J., Hu Y., Zhu Q.-Y.	Virologica Sinica	2011	PASS	Record does not describe an in vivo study
29288673	10.1016/j.virusres.2017.12.011	Construction and immunogenicity analysis of Lactobacillus plantarum expressing a porcine epidemic diarrhea virus S gene fused to a DC-targeting peptide	Huang KY, Yang GL, Jin YB, Liu J, Chen HL, Wang PB, Jiang YL, Shi CW, Huang HB, Wang JZ, Wang G, Kang YH, Yang WT, Wang CF.	Virus Res	2018	Record concerns coronaviruses but describes neither a novel nor an attenuated coronavirus
	10.3390/vaccines9020146	Construction and immunogenicity comparison of three virus-like particles carrying different combinations of structural proteins of avian coronavirus infectious bronchitis virus	Zhang Y., Yuan Y., Zhang L.-H., Zhu D., Wang L., Wei L.-P., Fan W.-S., Zhao C.-R., Su Y.-J., Liao J.-Q., Yong L., Wei T.-C., Wei P., Mo M.-L.	Vaccines	2021	Record concerns coronaviruses but describes neither a novel nor an attenuated coronavirus
20951182	10.1016/j.vaccine.2010.09.106	Construction and immunogenicity of a recombinant fowlpox vaccine coexpressing S1 glycoprotein of infectious bronchitis virus and chicken IL-18	Chen HY, Yang MF, Cui BA, Cui P, Sheng M, Chen G, Wang SJ, Geng JW.	Vaccine	2010	Record concerns coronaviruses but describes neither a novel nor an attenuated coronavirus
12495043	10.1637/0005-2086(2002)046[0831:CAISOR]2.0.CO;2	Construction and immunogenicity studies of recombinant fowl poxvirus containing the S1 gene of Massachusetts 41 strain of infectious bronchitis virus	Wang X, Schnitzlein WM, Tripathy DN, Girshick T, Khan MI.	Avian Dis	2002	Record concerns coronaviruses but describes neither a novel nor an attenuated coronavirus
26980672	10.1007/s11262-016-1316-z	Construction of a bivalent DNA vaccine co-expressing S genes of transmissible gastroenteritis virus and porcine epidemic diarrhea virus delivered by attenuated Salmonella typhimurium	Zhang Y., Zhang X., Liao X., Huang X., Cao S., Wen X., Wen Y., Wu R., Liu W.	Virus Genes	2016	Record concerns coronaviruses but describes neither a novel nor an attenuated coronavirus
34191580	10.1128/JVI.00687-21	Construction of a Noninfectious SARS-CoV-2 Replicon for Antiviral-Drug Testing and Gene Function Studies	Nguyen, HT; Falzarano, D; Gerdts, V; Liu, Q	JOURNAL OF VIROLOGY	2021	Record describes a coronavirus that cannot replicate
30855219	10.1089/vim.2018.0108	Construction of a Recombinant Lactococcus lactis Strain Expressing a Variant Porcine Epidemic Diarrhea Virus S1 Gene and Its Immunogenicity Analysis in Mice	Guo M, Yi S, Guo Y, Zhang S, Niu J, Wang K, Hu G.	Viral Immunol	2019	Record concerns coronaviruses but describes neither a novel nor an attenuated coronavirus
34578449	10.3390/v13091866	Construction of a recombinant porcine epidemic diarrhea virus encoding nanoluciferase for high-throughput screening of natural antiviral products	Li W., Zhang M., Zheng H., Zhou P., Liu Z., Jongkaewwattana A., Luo R., He Q.	Viruses	2021	Record concerns coronaviruses but describes neither a novel nor an attenuated coronavirus
16928748	10.1128/JVI.00385-06	Construction of a severe acute respiratory syndrome coronavirus infectious cDNA clone and a replicon to study coronavirus RNA synthesis	Almazán F, Dediego ML, Galán C, Escors D, Alvarez E, Ortego J, Sola I, Zuñiga S, Alonso S, Moreno JL, Nogales A, Capiscol C, Enjuanes L.	J Virol	2006	Record concerns coronaviruses but describes neither a novel nor an attenuated coronavirus
	10.1590/s0103-84782010000600017	Construction of an avian single chain monoclonal antibodies (scFv) library by phage display that cross-reacted with heterologous avian infectious bronchitis virus strains [Construção de uma biblioteca de fragmentos de anticorpos monoclonais de galinhas com cadeia única (scFv) por phage display com reatividade cruzada para estirpes heterólogas do vírus da bronquite infecciosa aviária]	Fernandes C.C., Caetano A.G., Gonçalves M.C.M., Montassier M.F.S., Gibertoni A.M., Montassier H.J.	Ciencia Rural	2010	Record concerns coronaviruses but describes neither a novel nor an attenuated coronavirus
32813067	10.1007/s00253-020-10834-2	Construction of an infectious bronchitis virus vaccine strain carrying chimeric S1 gene of a virulent isolate and its pathogenicity analysis	Lv C., Shi T., Zhu P., Peng X., Cao S., Yan Y., Ojha N.K., Liao M., Zhou J.	Applied Microbiology and Biotechnology	2020	Record describes coronavirus attenuation method that cannot be applied to SARS-CoV-2
26297958	10.1016/j.jviromet.2015.08.011	Construction of an oral vaccine for transmissible gastroenteritis virus based on the TGEV N gene expressed in an attenuated Salmonella typhimurium vector	Zhang D., Huang X., Zhang X., Cao S., Wen X., Wen Y., Wu R., Liang E.	Journal of Virological Methods	2016	Record concerns coronaviruses but describes neither a novel nor an attenuated coronavirus
	10.3390/vaccines9040370	Construction of porcine epidemic diarrhea virus-like particles and its immunogenicity in mice	Kim J., Yoon J., Park J.-E.	Vaccines	2021	Record concerns coronaviruses but describes neither a novel nor an attenuated coronavirus
17552243		Construction of recombinant BCG bearing S1 glycoprotein of nephropathogenic IBV and study on its immunogenicity on chickens	Bai J.N., Bian Y.Q., Zhao B.H.	Wei sheng wu xue bao = Acta microbiologica Sinica	2007	Record concerns coronaviruses but describes neither a novel nor an attenuated coronavirus
23145823	10.1139/w2012-098	Construction of recombinant lactobacilli expressing the core neutralizing epitope (COE) of porcine epidemic diarrhea virus and a fusion protein consisting of COE and Escherichia coli heat-labile enterotoxin B, and comparison of the immune responses by orogastric immunization	Ge JW, Liu DQ, Li YJ.	Can J Microbiol	2012	Record concerns coronaviruses but describes neither a novel nor an attenuated coronavirus
	10.3389/fphar.2022.807256	Construction of the Enterococcal Strain Expressing Immunogenic Fragment of SARS-Cov-2 Virus	Suvorov A., Gupalova T., Desheva Y., Kramskaya T., Bormotova E., Koroleva I., Kopteva O., Leontieva G.	Frontiers in Pharmacology	2022	Record concerns coronaviruses but describes neither a novel nor an attenuated coronavirus
35145407	10.3389/fphar.2021.807256	Construction of the Enterococcal Strain Expressing Immunogenic Fragment of SARS-Cov-2 Virus	Suvorov A, Gupalova T, Desheva Y, Kramskaya T, Bormotova E, Koroleva I, Kopteva O, Leontieva G.	Front Pharmacol	2022	Record concerns coronaviruses but describes neither a novel nor an attenuated coronavirus
34696421	10.3390/v13101991	Construction, Characterization and Application of Recombinant Porcine Deltacoronavirus Expressing Nanoluciferase	Fang P, Zhang H, Sun H, Wang G, Xia S, Ren J, Zhang J, Tian L, Fang L, Xiao S.	Viruses	2021	Record describes a novel non-attenuated coronavirus
19388267		Construction, safety and immunogenicity analysis of attenuated salmonella typhimurium harbouring TGEV DNA vaccine	Yang H., Liu J., Cao S., Huang X., Wen X.	Wei sheng wu xue bao = Acta microbiologica Sinica	2009	Record concerns coronaviruses but describes neither a novel nor an attenuated coronavirus
25446828	10.1016/j.vaccine.2014.10.006	Continued use of IBV 793B vaccine needs reassessment after its withdrawal led to the genotype's disappearance	Franzo G., Naylor C.J., Lupini C., Drigo M., Catelli E., Listorti V., Pesente P., Giovanardi D., Morandini E., Cecchinato M.	Vaccine	2014	Record concerns coronaviruses but describes neither a novel nor an attenuated coronavirus
8144965		Contribution of antibody-secreting cells induced in mucosal lymphoid tissues of pigs inoculated with respiratory or enteric strains of coronavirus to immunity against enteric coronavirus challenge	Vancott J.L., Brim T.A., Lunney J.K., Saif L.J.	Journal of Immunology	1994	Record describes a novel non-attenuated coronavirus
8723879		Contribution of passive immunity to porcine respiratory coronavirus to protection against transmissible gastroenteritis virus challenge exposure in suckling pigs	Sestak K., Lanza I., Park S.-K., Weilnau P.A., Saif L.J.	American Journal of Veterinary Research	1996	Record concerns coronaviruses but describes neither a novel nor an attenuated coronavirus
34133899	10.1128/JVI.00402-21	Contribution of SARS-CoV-2 accessory proteins to viral pathogenicity in K18 human ACE2 transgenic mice	Silvas J.A., Vasquez D.M., Park J.-G., Chiem K., Allué-Guardia A., Garcia-Vilanova A., Platt R.N., Miorin L., Kehrer T., Cupic A., Gonzalez-Reiche A.S., van Bakel H., García-Sastre A., Anderson T., Torrelles J.B., Ye C., Martinez-Sobrido L.	Journal of Virology	2021	PASS	PASS
34536797	10.1016/j.virol.2021.09.001	Contribution of single mutations to selected SARS-CoV-2 emerging variants spike antigenicity	Gong SY, Chatterjee D, Richard J, Prévost J, Tauzin A, Gasser R, Bo Y, Vézina D, Goyette G, Gendron-Lepage G, Medjahed H, Roger M, Côté M, Finzi A.	Virology	2021	Record describes a novel non-attenuated coronavirus
24041648	10.1016/j.virusres.2013.09.006	Contributions of the S2 spike ectodomain to attachment and host range of infectious bronchitis virus	Promkuntod N., Wickramasinghe I.N.A., de Vrieze G., Gröne A., Verheije M.H.	Virus Research	2013	Record concerns coronaviruses but describes neither a novel nor an attenuated coronavirus
15994805	10.1128/JVI.79.14.9108-9118.2005	Contributions of the viral genetic background and a single amino acid substitution in an immunodominant CD8+ T-cell epitope to murine coronavirus neurovirulence	MacNamara K.C., Chua M.M., Phillips J.J., Weiss S.R.	Journal of Virology	2005	Record describes coronavirus attenuation method that cannot be applied to SARS-CoV-2
		CONTROL OF FELINE CORONAVIRUS INFECTIONS IN BREEDING CATTERIES BY SEROTESTING, ISOLATION, AND EARLY WEANING	ADDIE, DD; JARRETT, O	FELINE PRACTICE	1995	Record concerns coronaviruses but describes neither a novel nor an attenuated coronavirus
33239605	10.12659/MSM.929789	Convalescent Memory T Cell Immunity in Individuals with Mild or Asymptomatic SARS-CoV-2 Infection May Result from an Evolutionarily Adapted Immune Response to Coronavirus and the 'Common Cold'	Stefano GB, Kream RM.	Med Sci Monit	2020	Record concerns coronaviruses but describes neither a novel nor an attenuated coronavirus
34907161	10.1038/s41467-021-27511-1	Convergent use of phosphatidic acid for hepatitis C virus and SARS-CoV-2 replication organelle formation	Tabata K., Prasad V., Paul D., Lee J.-Y., Pham M.-T., Twu W.-I., Neufeldt C.J., Cortese M., Cerikan B., Stahl Y., Joecks S., Tran C.S., Lüchtenborg C., V’kovski P., Hörmann K., Müller A.C., Zitzmann C., Haselmann U., Beneke J., Kaderali L., Erfle H., Thiel V., Lohmann V., Superti-Furga G., Brügger B., Bartenschlager R.	Nature Communications	2021	Record concerns coronaviruses but describes neither a novel nor an attenuated coronavirus
33259540	10.1371/journal.pone.0243190	Core warming of coronavirus disease 2019 (COVID-19) patients undergoing mechanical ventilation-A protocol for a randomized controlled pilot study	Bonfanti N, Gundert E, Drewry AM, Goff K, Bedimo R, Kulstad E.	PLoS One	2020	Record concerns coronaviruses but describes neither a novel nor an attenuated coronavirus
	10.1016/j.jgr.2020.12.005	Corona-Cov-2 (COVID-19) and ginseng: Comparison of possible use in COVID-19 and influenza	Lee W.S., Rhee D.-K.	Journal of Ginseng Research	2021	Record concerns coronaviruses but describes neither a novel nor an attenuated coronavirus
	10.1111/hiv.13129	Coronavirus (COVID)-19 in people with HIV in the UK: Initial findings from the BHIVA COVID-19 Registry	Sabin C., Raya R., Curtis H., Waters L., Chadwick D.	HIV Medicine (2021) 22:SUPPL 2 (7). Date of Publication: 1 Aug 2021	2021	Record concerns coronaviruses but describes neither a novel nor an attenuated coronavirus
32840608	10.1093/cid/ciaa1275	Coronavirus Disease 2019 (COVID-19) Re-infection by a Phylogenetically Distinct Severe Acute Respiratory Syndrome Coronavirus 2 Strain Confirmed by Whole Genome Sequencing	To KK, Hung IF, Ip JD, Chu AW, Chan WM, Tam AR, Fong CH, Yuan S, Tsoi HW, Ng AC, Lee LL, Wan P, Tso EY, To WK, Tsang DN, Chan KH, Huang JD, Kok KH, Cheng VC, Yuen KY.	Clin Infect Dis	2021	Record concerns coronaviruses but describes neither a novel nor an attenuated coronavirus
33991381	10.1111/odi.13916	Coronavirus disease 2019 (COVID-19) vaccines: A concise review	Samaranayake L.P., Seneviratne C.J., Fakhruddin K.S.	Oral Diseases (2021). Date of Publication: 2021	2021	Record is a review on coronavirus attenuation
34395948	10.1016/j.cegh.2021.100848	Coronavirus disease 2019 vaccine acceptance and perceived barriers among university students in northeast Ethiopia: A cross-sectional study	Taye BT, Amogne FK, Demisse TL, Zerihun MS, Kitaw TM, Tiguh AE, Mihret MS, Kebede AA.	Clin Epidemiol Glob Health	2021	Record concerns coronaviruses but describes neither a novel nor an attenuated coronavirus
34646910	10.1093/ofid/ofab465	Coronavirus Disease 2019 Vaccine Impact on Rates of Severe Acute Respiratory Syndrome Coronavirus 2 Cases and Postvaccination Strain Sequences Among Health Care Workers at an Urban Academic Medical Center: A Prospective Cohort Study	Bouton TC, Lodi S, Turcinovic J, Schaeffer B, Weber SE, Quinn E, Korn C, Steiner J, Schechter-Perkins EM, Duffy E, Ragan EJ, Taylor BP, Miller N, Davidoff R, Hanage WP, Connor J, Pierre C, Jacobson KR.	Open Forum Infect Dis	2021	Record concerns coronaviruses but describes neither a novel nor an attenuated coronavirus
	10.33616/LAM.31.024	Coronavirus disease-2019 among rheumatic musculoskeletal patients - possible outcomes of infection, severe disease development and effectiveness of vaccination [Koronavírus-betegség reumatológiai betegek körében - a megfertôzôdés, a súlyos lefolyás és a hatásos vakcináció esélyei]	LÁSZLÓ H.	Lege Artis Medicinae	2021	Record concerns coronaviruses but describes neither a novel nor an attenuated coronavirus
30728254	10.1128/JVI.02000-18	Coronavirus endoribonuclease activity in porcine epidemic diarrhea virus suppresses type I and type III interferon responses	Deng X., Van Geelen A., Buckley A.C., O’Brien A., Pillatzki A., Lager K.M., Faaberg K.S., Baker S.C.	Journal of Virology	2019	PASS	PASS
33361429	10.1128/JVI.02103-20	Coronavirus endoribonuclease ensures efficient viral replication and prevents protein kinase R activation	Zhao J., Sun L., Zhao Y., Feng D., Cheng J., Zhang G.	Journal of Virology	2021	PASS	PASS
19439466	10.1128/JVI.00495-09	Coronavirus genetically redirected to the epidermal growth factor receptor exhibits effective antitumor activity against a malignant glioblastoma	Verheije MH, Lamfers ML, Würdinger T, Grinwis GC, Gerritsen WR, van Beusechem VW, Rottier PJ.	J Virol	2009	Record describes coronavirus attenuation method that cannot be applied to SARS-CoV-2
3014053	10.1099/0022-1317-67-7-1435	Coronavirus IBV: virus retaining spike glycopolypeptide S2 but not S1 is unable to induce virus-neutralizing or haemagglutination-inhibiting antibody, or induce chicken tracheal protection.	Cavanagh D., Davis P.J., Darbyshire J.H., Peters R.W.	The Journal of general virology	1986	Record concerns coronaviruses but describes neither a novel nor an attenuated coronavirus
8116187	10.1016/0378-1135(93)90030-B	Coronavirus immunogens	Saif L.J.	Veterinary Microbiology	1993	Record is a review on coronavirus attenuation
32778178	10.1186/s13071-020-04292-y	Coronavirus in cat flea: Findings and questions regarding COVID-19	Villar M., Fernández De Mera I.G., Artigas-Jerónimo S., Contreras M., Gortázar C., De La Fuente J.	Parasites and Vectors	2020	Record concerns coronaviruses but describes neither a novel nor an attenuated coronavirus
8064222	10.1084/jem.180.3.1013	CORONAVIRUS INDUCTION OF CLASS-I MAJOR HISTOCOMPATIBILITY COMPLEX EXPRESSION IN MURINE ASTROCYTES IS VIRUS-STRAIN SPECIFIC	GILMORE, W; CORREALE, J; WEINER, LP	JOURNAL OF EXPERIMENTAL MEDICINE	1994	Record describes a novel non-attenuated coronavirus
		CORONAVIRUS INFECTION IN CATS	HOSKINS, JD	COMPENDIUM ON CONTINUING EDUCATION FOR THE PRACTICING VETERINARIAN	1991	PASS	Record concerns coronaviruses but describes neither a novel nor an attenuated coronavirus
1653100		Coronavirus infection in the laboratory rat: Immunization trials using attenuated virus replicated in L-2 cells	Percy D.H., Scott R.A.W.	Canadian Journal of Veterinary Research	1991	PASS	The sequence of coronavirus described by the record is not known
18305036	10.1128/JVI.00017-08	Coronavirus infection modulates the unfolded protein response and mediates sustained translational repression	Bechill J., Chen Z., Brewer J.W., Baker S.C.	Journal of Virology	2008	Record concerns coronaviruses but describes neither a novel nor an attenuated coronavirus
29580080	10.1556/004.2018.003	Coronavirus infection retards the development of the cortico-medullary capillary network in the bursa of fabricius of chicken	Farsang A., Bódi I., Fölker O., Minkó K., Benyeda Z., Bálint Á., Kiss A.L., Oláh I.	Acta Veterinaria Hungarica	2018	The sequence of coronavirus described by the record is not known
	10.5152/TurkArchPediatr.2020.20255	Coronavirus infections in childhood and vaccine studies	Aygün D., Önal P., Apaydın G., Çokuğraş H.	Turk Pediatri Arsivi	2021	Record concerns coronaviruses but describes neither a novel nor an attenuated coronavirus
7954126		Coronavirus infections in the laboratory rat: degree of cross protection following immunization with a heterologous strain	Bihun CG, Percy DH.	Can J Vet Res	1994	Record describes a novel non-attenuated coronavirus
1314455	10.1016/0042-6822(92)90757-g	Coronavirus infects and causes demyelination in primate central nervous system	Murray RS, Cai GY, Hoel K, Zhang JY, Soike KF, Cabirac GF.	Virology	1992	Record concerns coronaviruses but describes neither a novel nor an attenuated coronavirus
17696607	10.1371/journal.ppat.0030109	Coronavirus non-structural protein 1 is a major pathogenicity factor: Implications for the rational design of coronavirus vaccines	Züst R., Cervantes-Barragán L., Kuri T., Blakqori G., Weber F., Ludewig B., Thiel V.	PLoS Pathogens	2007	PASS	Record describes coronavirus attenuation method that cannot be applied to SARS-CoV-2
28484023	10.1073/pnas.1618310114	Coronavirus nonstructural protein 15 mediates evasion of dsRNA sensors and limits apoptosis in macrophages	Deng X., Hackbart M., Mettelman R.C., O'Brien A., Mielech A.M., Yi G., Kao C.C., Baker S.C.	Proceedings of the National Academy of Sciences of the United States of America	2017	PASS	PASS
27185912	10.1073/pnas.1519881113	Coronavirus receptor switch explained from the stereochemistry of protein-carbohydrate interactions and a single mutation	Bakkers MJ, Zeng Q, Feitsma LJ, Hulswit RJ, Li Z, Westerbeke A, van Kuppeveld FJ, Boons GJ, Langereis MA, Huizinga EG, de Groot RJ.	Proc Natl Acad Sci U S A	2016	Record describes a novel non-attenuated coronavirus
29511076	10.1128/mBio.00221-18	Coronavirus susceptibility to the antiviral remdesivir (GS-5734) is mediated by the viral polymerase and the proofreading exoribonuclease	Agostini M.L., Andres E.L., Sims A.C., Graham R.L., Sheahan T.P., Lu X., Smith E.C., Case J.B., Feng J.Y., Jordan R., Ray A.S., Cihlar T., Siegel D., Mackman R.L., Clarke M.O., Baric R.S., Denison M.R.	mBio	2018	PASS	PASS
25093995	10.1016/j.virusres.2014.07.024	Coronavirus virulence genes with main focus on SARS-CoV envelope gene	DeDiego M.L., Nieto-Torres J.L., Jimenez-Guardeño J.M., Regla-Nava J.A., Castaño-Rodriguez C., Fernandez-Delgado R., Usera F., Enjuanes L.	Virus Research	2014	PASS	Record is a review on coronavirus attenuation
6268032	10.1007/BF00505035	Coronavirus-associated antibodies in nasopharyngeal carcinoma and infectious mononucleosis	Arnold W., Klein M., Wang J.B., Schmidt W.A.K., Trampisch H.J.	Archives of Oto-Rhino-Laryngology	1981	Record concerns coronaviruses but describes neither a novel nor an attenuated coronavirus
14557617	10.1128/JVI.77.21.11312-11323.2003	Coronaviruses as Vectors: Position Dependence of Foreign Gene Expression	De Haan C.A.M., Van Genne L., Stoop J.N., Volders H., Rottier P.J.M.	Journal of Virology	2003	Record describes a novel non-attenuated coronavirus
16188977	10.1128/JVI.79.20.12742-12751.2005	Coronaviruses as vectors: Stability of foreign gene expression	De Haan C.A.M., Haijema B.J., Boss D., Heuts F.W.H., Rottier P.J.M.	Journal of Virology	2005	Record describes a novel non-attenuated coronavirus
8209759	10.1007/978-1-4615-2996-5_61	Coronaviruses from persistent infected cell cultures and brain tissue: Molecular analysis of the S gene of an avirulent variant	Stuhler A., Flory E., Wege H., Wege H.	Advances in Experimental Medicine and Biology	1994	PASS	The sequence of coronavirus described by the record is not known
12438575	10.1128/JVI.76.24.12491-12502.2002	Coronaviruses maintain viability despite dramatic rearrangements of the strictly conserved genome organization	De Haan C.A.M., Volders H., Koetzner C.A., Masters P.S., Rottier P.J.M.	Journal of Virology	2002	PASS	Record does not describe an in vivo study
25100843	10.1128/JVI.01528-14	Coronaviruses resistant to a 3C-like protease inhibitor are attenuated for replication and pathogenesis, revealing a low genetic barrier but high fitness cost of resistance	Deng X., St John S.E., Osswald H.L., O'Brien A., Banach B.S., Sleeman K., Ghosh A.K., Mesecar A.D., Baker S.C.	Journal of Virology	2014	PASS	Record describes coronavirus attenuation method that cannot be applied to SARS-CoV-2
6687965	10.1016/s0042-6822(83)80022-1	Coronaviruses SD and SK share extensive nucleotide homology with murine coronavirus MHV-A59, more than that shared between human and murine coronaviruses	Weiss SR.	Virology	1983	Record concerns coronaviruses but describes neither a novel nor an attenuated coronavirus
21538303	10.1002/9780471729259.mc15e01s21	Coronaviruses: propagation, quantification, storage, and construction of recombinant mouse hepatitis virus	Leibowitz J, Kaufman G, Liu P.	Curr Protoc Microbiol	2011	Record is a review on coronavirus attenuation
25007876	10.1152/ajprenal.00151.2014	Coronavirus-induced demyelination of neural pathways triggers neurogenic bladder overactivity in a mouse model of multiple sclerosis	McMillan M.T., Pan X.-Q., Smith A.L., Newman D.K., Weiss S.R., Ruggieri Sr. M.R., Malykhina A.P.	American Journal of Physiology - Renal Physiology	2014	Record concerns coronaviruses but describes neither a novel nor an attenuated coronavirus
25304691	10.1016/j.virusres.2014.09.016	Coronavirus-induced ER stress response and its involvement in regulation of coronavirus-host interactions	Fung T.S., Huang M., Liu D.X.	Virus Research	2014	Record concerns coronaviruses but describes neither a novel nor an attenuated coronavirus
6761509		Coronavirus-like particles in laboratory rabbits with different syndromes in the Netherlands	Osterhaus A.D.M.E., Teppema J.S., Van Steenis G.	Laboratory Animal Science	1982	Record describes a novel non-attenuated coronavirus
34060490	10.1172/JCI147201	Coronavirus-specific antibody production in middle-aged mice requires phospholipase A2G2D	Zheng J, Meyerholz D, Wong LR, Gelb M, Murakami M, Perlman S.	J Clin Invest	2021	Record concerns coronaviruses but describes neither a novel nor an attenuated coronavirus
	10.2147/JIR.S298242	Coronil, a tri-herbal formulation, attenuates spike-protein-mediated sars-cov-2 viral entry into human alveolar epithelial cells and pro-inflammatory cytokines production by inhibiting spike protein-ace-2 interaction	Balkrishna A., Haldar S., Singh H., Roy P., Varshney A.	Journal of Inflammation Research	2021	Record concerns coronaviruses but describes neither a novel nor an attenuated coronavirus
	10.1007/s13337-018-0420-1	Correction to: Efficacy of H120 and Ma5 avian infectious bronchitis vaccines in early challenge against QX strain (VirusDisease, (2018), 29, 1, (123-126), 10.1007/s13337-017-0414-4)	Karimi V., Ghalyanchilangeroudi A., Hashemzadeh M., Rahimi F., Zabihi Petroudi M.T., Farahani R.K., Maghsoudloo H., Abdollahi H.	VirusDisease	2018	Record does not describe an in vivo study
33242200	10.1007/s40121-020-00371-w	Correction to: Vaccines for SARS-CoV-2: Lessons from Other Coronavirus Strains	Padron-Regalado E.	Infect Dis Ther	2021	Record concerns coronaviruses but describes neither a novel nor an attenuated coronavirus
	10.1371/journal.pone.0094740	Correction: Attenuation of mouse hepatitis virus by deletion of the LLRKxGxKG region of Nsp1	[No author name available]	PLoS ONE	2014	Record describes coronavirus attenuation method that cannot be applied to SARS-CoV-2
34819514	10.1038/s41598-021-01930-y	Correlates of neutralizing/SARS-CoV-2-S1-binding antibody response with adverse effects and immune kinetics in BNT162b2-vaccinated individuals	Maeda K, Amano M, Uemura Y, Tsuchiya K, Matsushima T, Noda K, Shimizu Y, Fujiwara A, Takamatsu Y, Ichikawa Y, Nishimura H, Kinoshita M, Matsumoto S, Gatanaga H, Yoshimura K, Oka SI, Mikami A, Sugiura W, Sato T, Yoshida T, Shimada S, Mitsuya H.	Sci Rep	2021	Record concerns coronaviruses but describes neither a novel nor an attenuated coronavirus
34588689	10.1038/s41591-021-01540-1	Correlates of protection against symptomatic and asymptomatic SARS-CoV-2 infection	Feng S, Phillips DJ, White T, Sayal H, Aley PK, Bibi S, Dold C, Fuskova M, Gilbert SC, Hirsch I, Humphries HE, Jepson B, Kelly EJ, Plested E, Shoemaker K, Thomas KM, Vekemans J, Villafana TL, Lambe T, Pollard AJ, Voysey M; Oxford COVID Vaccine Trial Group.	Nat Med	2021	Record concerns coronaviruses but describes neither a novel nor an attenuated coronavirus
	10.14202/vetworld.2021.1689-1694	Correlation between antibody response against porcine epidemic diarrhea virus in sows and their offspring under field conditions	Boonsoongnern P., Boodde O., Chumsing W., Sukmak M., Jirawattanapong P., Ratanavanichrojn N., Boonsoongnern A.	Veterinary World	2021	PASS	The sequence of coronavirus described by the record is not known
34943453	10.3390/diagnostics11122216	Correlation between Commercial Anti-RBD IgG Titer and Neutralization Titer against SARS-CoV-2 Beta Variant	Poon RW, Lu L, Fong CH, Ip TC, Chen LL, Zhang RR, Yip CC, Cheng VC, Chan KH, Yuen KY, To KK.	Diagnostics (Basel)	2021	Record concerns coronaviruses but describes neither a novel nor an attenuated coronavirus
33197260	10.1093/infdis/jiaa713	Correlation between Early Plasma Interleukin 37 Responses with Low Inflammatory Cytokine Levels and Benign Clinical Outcomes in Severe Acute Respiratory Syndrome Coronavirus 2 Infection	Li A., Ling Y., Song Z., Cheng X., DIng L., Jiang R., Fu W., Liu Y., Hu H., Yuan S., Chen J., Zhu C., Fan J., Wang J., Jin Y., Zhang M., Zhu L., Sun P., Zhang L., Qin R., Zhang W., Qiu C., Shen Y., Zhang L., Shi Z., Zhao C., Zhu T., Lu H., Zhang X., Xu J.	Journal of Infectious Diseases	2021	Record concerns coronaviruses but describes neither a novel nor an attenuated coronavirus
6277785	10.1128/iai.34.3.1059-1061.1981	Correlation between growth potential of mouse hepatitis viruses in macrophages and their virulence for mice	Taguchi F., Yamaguchi R., Makino S., Fujiwara K.	Infection and Immunity	1981	PASS	Record describes coronavirus attenuation method that cannot be applied to SARS-CoV-2
34737312	10.1038/s41467-021-26672-3	Correlation of SARS-CoV-2-breakthrough infections to time-from-vaccine	Mizrahi B, Lotan R, Kalkstein N, Peretz A, Perez G, Ben-Tov A, Chodick G, Gazit S, Patalon T.	Nat Commun	2021	Record concerns coronaviruses but describes neither a novel nor an attenuated coronavirus
	10.1016/j.vaccine.2012.02.045	Corrigendum to " MHV-68 producing mIFNα1 is severely attenuated in vivo and effectively protects mice against challenge with wt MHV-68" [Vaccine 29 (2011) 3935-3944]	Aricò E., Monque D.M., D'Agostino G., Moschella F., Venditti M., Kalinke U., Allen D.J., Stewart J.P., Nash A.A., Belardelli F., Ferrantini M.	Vaccine	2012	Record does not concern coronaviruses
	10.1002/phar.2637	Corticosteroid use in ARDS and its application to evolving therapeutics for coronavirus disease 2019 (COVID-19): A systematic review	Landolf K.M., Lemieux S.M., Rose C., Johnston J.P., Adams C.D., Altshuler J., Berger K., Dixit D., Effendi M.K., Heavner M.S., Lemieux D., Littlefield A.J., Nei A.M., Owusu K.A., Rinehart M., Robbins B., Rouse G.E., Thompson Bastin M.L.	Pharmacotherapy (2021). Date of Publication: 2021	2021	Record concerns coronaviruses but describes neither a novel nor an attenuated coronavirus
33031080	10.3855/JIDC.12805	Could “trained immunity” be induced by live attenuated vaccines protect against COVID-19? Review of available evidence	Alsulaiman J.W., Khasawneh A.I., Kheirallah K.A.	Journal of Infection in Developing Countries	2020	Record concerns coronaviruses but describes neither a novel nor an attenuated coronavirus
32561657	10.1128/mBio.00907-20	Could an unrelated live attenuated vaccine serve as a preventive measure to dampen septic inflammation associated with covid-19 infection?	Fidel P.L., Jr., Noverr M.C.	mBio	2020	Record concerns coronaviruses but describes neither a novel nor an attenuated coronavirus
32218340	10.3390/ijms21072272	Could Intravenous Immunoglobulin Collected from Recovered Coronavirus Patients Protect against COVID-19 and Strengthen the Immune System of New Patients?	Jawhara S.	Int J Mol Sci	2020	Record concerns coronaviruses but describes neither a novel nor an attenuated coronavirus
33129966	10.1016/j.ijid.2020.10.059	Could SARS-CoV-2-induced lung injury be attenuated by vitamin D?	Xiao D., Li X., Su X., Mu D., Qu Y.	International Journal of Infectious Diseases	2021	Record concerns coronaviruses but describes neither a novel nor an attenuated coronavirus
229123	10.1128/jcm.10.2.240-244.1979	Counterimmunoelectroosmophoresis for detective of neonatal calf diarrhea coronavirus: Methodology and comparison with electron microscopy	Dea S., Roy R.S., Begin M.E.	Journal of Clinical Microbiology	1979	Record concerns coronaviruses but describes neither a novel nor an attenuated coronavirus
18976820	10.1016/j.vetimm.2008.09.016	Course of infection and immune responses in the respiratory tract of IBV infected broilers after superinfection with E. coli	Matthijs M.G.R., Ariaans M.P., Dwars R.M., van Eck J.H.H., Bouma A., Stegeman A., Vervelde L.	Veterinary Immunology and Immunopathology	2009	Record concerns coronaviruses but describes neither a novel nor an attenuated coronavirus
32805021	10.1093/bioinformatics/btaa739	CoV-AbDab: the coronavirus antibody database	Raybould MIJ, Kovaltsuk A, Marks C, Deane CM.	Bioinformatics	2021	Record concerns coronaviruses but describes neither a novel nor an attenuated coronavirus
35102138	10.1038/s41421-021-00370-2	CoVac501, a self-adjuvanting peptide vaccine conjugated with TLR7 agonists, against SARS-CoV-2 induces protective immunity	Long Y, Sun J, Song TZ, Liu T, Tang F, Zhang X, Ding L, Miao Y, Zhu W, Pan X, An Q, Qin M, Tong X, Peng X, Yu P, Zhu P, Xu J, Zhang X, Zhang Y, Liu D, Chen B, Chen H, Zhang L, Xiao G, Zuo J, Tang W, Zhou J, Li H, Xu Z, Zheng HY, Long XY, Qin Q, Gan Y, Ren J, Huang W, Zheng YT, Jin G, Gong L.	Cell Discov	2022	Record concerns coronaviruses but describes neither a novel nor an attenuated coronavirus
32423094	10.3390/ijms21103474	COVID-19 and Individual Genetic Susceptibility/Receptivity: Role of ACE1/ACE2 Genes, Immunity, Inflammation and Coagulation. Might the Double X-chromosome in Females Be Protective against SARS-CoV-2 Compared to the Single X-Chromosome in Males?	Gemmati D, Bramanti B, Serino ML, Secchiero P, Zauli G, Tisato V.	Int J Mol Sci	2020	Record is a review on coronavirus attenuation
33753106	10.1053/j.gastro.2021.03.029	COVID-19 Gastrointestinal Symptoms and Attenuation of the Immune Response to SARS-CoV-2	Miller J., Yan K.S.	Gastroenterology	2021	Record concerns coronaviruses but describes neither a novel nor an attenuated coronavirus
32975842	10.1002/jmv.26556	COVID-19 in people living with HIV: Clinical implications of dynamics of the immune response to SARS-CoV-2	Mondi A, Cimini E, Colavita F, Cicalini S, Pinnetti C, Matusali G, Casetti R, Maeurer M, Vergori A, Mazzotta V, Gagliardini R, De Zottis F, Schininà V, Girardi E, Puro V, Ippolito G, Vaia F, Capobianchi MR, Castilletti C, Agrati C, Antinori A.	J Med Virol	2021	Record concerns coronaviruses but describes neither a novel nor an attenuated coronavirus
34817583	10.1001/jamanetworkopen.2021.35044	COVID-19 Infection Among Women in Iran Exposed vs Unexposed to Children Who Received Attenuated Poliovirus Used in Oral Polio Vaccine	Habibzadeh F, Sajadi MM, Chumakov K, Yadollahie M, Kottilil S, Simi A, Stafford K, Saeidimehr S, Rafiei M, Gallo RC.	JAMA Netw Open	2021	Record concerns coronaviruses but describes neither a novel nor an attenuated coronavirus
	10.3390/vaccines8040692	Covid-19 infection detection and prevention by sars-cov-2 active antigens: A synthetic vaccine approach	Lozano J.M., Salazar L.M., Torres Á., Arévalo-Jamaica A., Franco-Muñoz C., Mercado-Reyes M., Aristizabal F.A.	Vaccines	2020	Record concerns coronaviruses but describes neither a novel nor an attenuated coronavirus
32989697	10.1007/s11356-020-10930-w	COVID-19 pandemic: environmental and social factors influencing the spread of SARS-CoV-2 in São Paulo, Brazil	Nakada LYK, Urban RC.	Environ Sci Pollut Res Int	2021	Record concerns coronaviruses but describes neither a novel nor an attenuated coronavirus
32853599	10.1016/j.jinf.2020.08.036	COVID-19 patients display distinct SARS-CoV-2 specific T-cell responses according to disease severity	Kroemer M, Spehner L, Vettoretti L, Bouard A, Eberst G, Pili Floury S, Capellier G, Lepiller Q, Orillard E, Mansi L, Clairet AL, Westeel V, Limat S, Dubois M, Malinowski L, Bohard L, Borg C, Chirouze C, Bouiller K.	J Infect	2021	Record concerns coronaviruses but describes neither a novel nor an attenuated coronavirus
	10.1007/s00259-020-04988-4	COVID-19 related findings assessed by dual reporting in our series of (18)F-FDG PET/CT studies performed over the coronavirus pandemic	Garcia J., Ortiz S., Compte A., Bassa P., Mourelo S., Soler M., Buxeda M., Blanch T., Valls E., Riera E.	European Journal of Nuclear Medicine and Molecular Imaging (2020) 47:SUPPL 1 (S300-S301). Date of Publication: 1 Sep 2020	2020	Record concerns coronaviruses but describes neither a novel nor an attenuated coronavirus
33414159	10.1128/JVI.02260-20	COVID-19 vaccine candidates based on modified vaccinia virus ankara expressing the SARS-CoV-2 spike protein induce robust T- And B-Cell immune responses and full efficacy in mice	García-Arriaza J., Garaigorta U., Pérez P., Lázaro-Frías A., Zamora C., Gastaminza P., Del Fresno C., Casasnovas J.M., Sorzano C.Ó.S., Sancho D., Esteban M.	Journal of Virology	2021	Record concerns coronaviruses but describes neither a novel nor an attenuated coronavirus
33320052	10.1177/0194599820982633	COVID-19 Vaccines May Not Prevent Nasal SARS-CoV-2 Infection and Asymptomatic Transmission	Bleier BS, Ramanathan M Jr, Lane AP.	Otolaryngol Head Neck Surg	2021	Record concerns coronaviruses but describes neither a novel nor an attenuated coronavirus
33296409	10.1371/journal.pone.0243414	COVID-MATCH65-A prospectively derived clinical decision rule for severe acute respiratory syndrome coronavirus 2	Trubiano JA, Vogrin S, Smibert OC, Marhoon N, Alexander AA, Chua KYL, James FL, Jones NRL, Grigg SE, Xu CLH, Moini N, Stanley SR, Birrell MT, Rose MT, Gordon CL, Kwong JC, Holmes NE.	PLoS One	2020	Record concerns coronaviruses but describes neither a novel nor an attenuated coronavirus
19818415	10.1016/j.intimp.2009.09.025	CpG ODN pretreatment attenuates concanavalin A-induced hepatitis in mice	Zhang H., Gong Q., Li J.-h., Kong X.-l., Tian L., Duan L.-h., Tong J., Song F.-f., Fang M., Zheng F., Xiong P., Tan Z., Gong F.-l.	International Immunopharmacology	2010	Record does not concern coronaviruses
11805104	10.1074/jbc.M110860200	Creating hetero-11-mers composed of wild-type and mutant subunits to study RNA binding to TRAP	Li P.T.X., Scott D.J., Gollnick P.	Journal of Biological Chemistry	2002	Record does not concern coronaviruses
3002005		Creation of an avirulent immunogenic mutant of the transmissible gastroenteritis virus and its use as a vaccine	Tatarov G.	Veterinarno-meditsinski nauki	1985	Report not retrieved
3002005		Creation of an avirulent immunogenic mutant of the transmissible gastroenteritis virus and its use as a vaccine [Sǔzdane na avirulenten imunogenen mutant ot virusa na transmisivniia gastroenterit i izpolzuvaneto mu kato vaksina.]	Tatarov G.	Veterinarno-meditsinski nauki	1985	PASS	Report not retrieved
34787487	10.1128/Spectrum.01017-21	CRISPR-Cas12a-Based Detection for the Major SARS-CoV-2 Variants of Concern	Liang Y, Lin H, Zou L, Zhao J, Li B, Wang H, Lu J, Sun J, Yang X, Deng X, Tang S.	Microbiol Spectr	2021	Record concerns coronaviruses but describes neither a novel nor an attenuated coronavirus
34337095	10.1093/ofid/ofab329	Critical Presentation of a Severe Acute Respiratory Syndrome Coronavirus 2 Reinfection: A Case Report	Massanella, M; Martin-Urda, A; Mateu, L; Marin, T; Aldas, I; Riveira-Munoz, E; Kipelainen, A; Jimenez-Moyano, E; de la Concepcion, MLR; Avila-Nieto, C; Trinite, B; Pradenas, E; Rodon, J; Marfil, S; Parera, M; Carrillo, J; Blanco, J; Prado, JG; Ballana, E; Vergara-Alert, J; Segales, J; Noguera-Julian, M; Masabeu, A; Clotet, B; Toda, MD; Paredes, R	OPEN FORUM INFECTIOUS DISEASES	2021	Record concerns coronaviruses but describes neither a novel nor an attenuated coronavirus
33407005	10.1080/22221751.2021.1872352	Critical role of neutralizing antibody for SARS-CoV-2 reinfection and transmission	Kim Y.-I., Kim S.-M., Park S.-J., Kim E.-H., Yu K.-M., Chang J.-H., Kim E.J., Casel M.A.B., Rollon R., Jang S.-G., Um J., Song M.-S., Jeong H.W., Kim E.-G., Kim Y., Kim S.Y., Park J.-S., Park M.S., Kwon G.-Y., Yeo S.G., Lee S.-A., Choi Y.J., Jung J.U., Choi Y.K.	Emerging Microbes and Infections	2021	Record concerns coronaviruses but describes neither a novel nor an attenuated coronavirus
33112147	10.1021/acs.jpcb.0c05994	Critical Sequence Hotspots for Binding of Novel Coronavirus to Angiotensin Converter Enzyme as Evaluated by Molecular Simulations	Ghorbani M, Brooks BR, Klauda JB.	J Phys Chem B	2020	Record concerns coronaviruses but describes neither a novel nor an attenuated coronavirus
		Cross neutralization reaction of SARS virus BJ01 and GZ01 strains with sera of SARS patients from Beijing and Guangzhou regions	Peng W.-M., Chang G.-H., Liu H., Yu M., Tan G., Fan B.-C., Jiang T., Deng Y.-Q., Duan H.-Y., Zhu Q.-Y., Qin E.-D.	Chinese Journal of Microbiology and Immunology	2003	Record concerns coronaviruses but describes neither a novel nor an attenuated coronavirus
28985754	10.1186/s13567-017-0469-7	Cross protective immune responses in nursing piglets infected with a US spike-insertion deletion porcine epidemic diarrhea virus strain and challenged with an original US PEDV strain	Annamalai T., Lin C.-M., Gao X., Liu X., Lu Z., Saif L.J., Wang Q.	Veterinary Research	2017	Record describes a novel non-attenuated coronavirus
16670317	10.4049/jimmunol.176.10.6085	Cross-neutralization of human and palm civet severe acute respiratory syndrome coronaviruses by antibodies targeting the receptor-binding domain of spike protein	He Y, Li J, Li W, Lustigman S, Farzan M, Jiang S.	J Immunol	2006	Record concerns coronaviruses but describes neither a novel nor an attenuated coronavirus
34320390	10.1016/j.jinf.2021.07.019	Cross-neutralization of SARS-CoV-2 B.1.1.7 and P.1 variants in vaccinated, convalescent and P.1 infected	Gidari A, Sabbatini S, Bastianelli S, Pierucci S, Busti C, Monari C, Luciani Pasqua B, Dragoni F, Schiaroli E, Zazzi M, Francisci D.	J Infect	2021	Record concerns coronaviruses but describes neither a novel nor an attenuated coronavirus
16971444	10.1128/JVI.00402-06	Cross-protection against a human enteric coronavirus and a virulent bovine enteric coronavirus in gnotobiotic calves	Han MG, Cheon DS, Zhang X, Saif LJ.	J Virol	2006	Record concerns coronaviruses but describes neither a novel nor an attenuated coronavirus
32967955	10.1128/JVI.01176-20	Cross-protection against MERS-CoV by prime-boost vaccination using viral spike DNA and Protein	Choi J.-A., Goo J., Yang E., Jung D.-I., Lee S., Rho S., Jeong Y., Park Y.-S., Park H., Moon Y.-H., Park U., Seo S.-H., Lee H., Lee J.M., Cho N.-H., Song M., Kim J.-O.	Journal of Virology	2020	Record concerns coronaviruses but describes neither a novel nor an attenuated coronavirus
26629628	10.1637/11231-070615-Reg.1	Cross-Protection by Infectious Bronchitis Viruses under Controlled Experimental Conditions	Toro H., Van Santen V.L., Ghetas A.M., Joiner K.S.	Avian Diseases	2015	PASS	The sequence of coronavirus described by the record is not known
11811688	10.1007/s007050170011	Cross-protection studies between respiratory and calf diarrhea and winter dysentery coronavirus strains in calves and RT-PCR and nested PCR for their detection	Cho KO, Hasoksuz M, Nielsen PR, Chang KO, Lathrop S, Saif LJ.	Arch Virol	2001	Record describes a novel non-attenuated coronavirus
1661063		Cross-protection studies with vaccine strain H-120 of infectious bronchitis virus using ciliary activity.	al-Tarcha B., Sadoon S.A.	Acta veterinaria Hungarica	1991	The sequence of coronavirus described by the record is not known
24283135	10.1637/10519-022213-ResNote.1	Cross-protective immune responses elicited by a korean variant of infectious bronchitis virus	Kim B.-Y., Lee D.-H., Jang J.-H., Lim T.-H., Choi S.-W., Youn H.-N., Park J.-K., Lee J.-B., Park S.-Y., Choi I.-S., Song C.-S.	Avian Diseases	2013	PASS	The sequence of coronavirus described by the record is not known
32426212	10.1016/j.celrep.2020.107725	Cross-reactive Antibody Response between SARS-CoV-2 and SARS-CoV Infections	Lv H, Wu NC, Tsang OT, Yuan M, Perera RAPM, Leung WS, So RTY, Chan JMC, Yip GK, Chik TSH, Wang Y, Choi CYC, Lin Y, Ng WW, Zhao J, Poon LLM, Peiris JSM, Wilson IA, Mok CKP.	Cell Rep	2020	Record concerns coronaviruses but describes neither a novel nor an attenuated coronavirus
33036961	10.1126/sciadv.abc9999	Cross-reactive neutralization of SARS-CoV-2 by serum antibodies from recovered SARS patients and immunized animals	Zhu Y, Yu D, Han Y, Yan H, Chong H, Ren L, Wang J, Li T, He Y.	Sci Adv	2020	Record concerns coronaviruses but describes neither a novel nor an attenuated coronavirus
33545052	10.1016/j.celrep.2021.108737	Cross-reactivity of SARS-CoV structural protein antibodies against SARS-CoV-2	Bates TA, Weinstein JB, Farley S, Leier HC, Messer WB, Tafesse FG.	Cell Rep	2021	Record concerns coronaviruses but describes neither a novel nor an attenuated coronavirus
	10.4167/jbv.2010.40.1.49	Cross-reactivity of vaccine and fields strains of bovine coronaviruses in Korea	Lee G., Song J.-Y., Cho I.-S., Yoon S.	Journal of Bacteriology and Virology	2010	The sequence of coronavirus described by the record is not known
33335073	10.1073/pnas.2020216118	Cross-species recognition of SARS-CoV-2 to bat ACE2	Liu K., Tan S., Niu S., Wang J., Wu L., Sun H., Zhang Y., Pan X., Qu X., Du P., Meng Y., Jia Y., Chen Q., Deng C., Yan J., Wang H.-W., Wang Q., Qi J., Gao G.F.	Proceedings of the National Academy of Sciences of the United States of America	2021	Record concerns coronaviruses but describes neither a novel nor an attenuated coronavirus
22008821	10.1016/j.vaccine.2011.10.016	Crosstalk between innate and adaptive immune responses to infectious bronchitis virus after vaccination and challenge of chickens varying in serum mannose-binding lectin concentrations	Juul-Madsen HR, Norup LR, Jørgensen PH, Handberg KJ, Wattrang E, Dalgaard TS.	Vaccine	2011	PASS	The sequence of coronavirus described by the record is not known
34099051	10.1186/s13578-021-00598-1	Crucial mutation in the exoribonuclease domain of nsp14 of PEDV leads to high genetic instability during viral replication	Niu X, Kong F, Hou YJ, Wang Q.	Cell Biosci	2021	Record describes coronavirus attenuation method that cannot be applied to SARS-CoV-2
32291501	10.1007/s00330-020-06860-3	CT features of novel coronavirus pneumonia (COVID-19) in children	Duan Y.-N., Zhu Y.-Q., Tang L.-L., Qin J.	European Radiology	2020	Record concerns coronaviruses but describes neither a novel nor an attenuated coronavirus
32755175	10.2214/AJR.20.23304	CT manifestations of coronavirus disease (COVID-19) pneumonia and influenza virus pneumonia: A comparative study	Lin L., Fu G., Chen S., Tao J., Qian A., Yang Y., Wang M.	American Journal of Roentgenology	2021	Record concerns coronaviruses but describes neither a novel nor an attenuated coronavirus
34916326	10.1136/bmjopen-2021-054208	CTN 328: immunogenicity outcomes in people living with HIV in Canada following vaccination for COVID-19 (HIV-COV): protocol for an observational cohort study	Costiniuk, CT; Singer, J; Langlois, MA; Kulic, I; Needham, J; Burchell, A; Jenabian, MA; Walmsley, S; Ostrowski, M; Kovacs, C; Tan, DR; Harris, M; Hull, M; Brumme, Z; Brockman, M; Margolese, S; Mandarino, E; Angel, JB; Routy, JP; Anis, AH; Cooper, C	BMJ OPEN	2021	Record concerns coronaviruses but describes neither a novel nor an attenuated coronavirus
6093344		Cultivation of the transmissible gastroenteritis virus in a continuous cell line [Kultivirane na virusa na transmismisivniia gastroenterit v postoianna kletǔchna liniia.]	Belopopska P., Motovski A.	Veterinarno-meditsinski nauki	1984	Report not retrieved
33389257	10.1007/s10096-020-04106-0	Culture of SARS-CoV-2 in a panel of laboratory cell lines, permissivity, and differences in growth profile	Wurtz N, Penant G, Jardot P, Duclos N, La Scola B.	Eur J Clin Microbiol Infect Dis	2021	Record concerns coronaviruses but describes neither a novel nor an attenuated coronavirus
20719951	10.1128/JVI.00947-10	Culturing the unculturable: Human coronavirus HKU1 infects, replicates, and produces progeny virions in human ciliated airway epithelial cell cultures	Pyrc K., Sims A.C., Dijkman R., Jebbink M., Long C., Deming D., Donaldson E., Vabret A., Baric R., Van Der Hoek L., Pickles R.	Journal of Virology	2010	Record describes a novel non-attenuated coronavirus
23063543	10.1016/j.ejphar.2012.09.050	Curcumin inhibits HMGB1 releasing and attenuates concanavalin A-induced hepatitis in mice	Wang C., Nie H., Li K., Zhang Y.-X., Yang F., Li C.-B., Wang C.-F., Gong Q.	European Journal of Pharmacology	2012	Record does not concern coronaviruses
22948514	10.1007/s10753-012-9536-4	Curcumin protects against concanavalin a-induced hepatitis in mice through inhibiting the cytoplasmic translocation and expression of high mobility group Box 1	Tu C.-T., Yao Q.-Y., Xu B.-L., Zhang S.-C.	Inflammation	2013	Record does not concern coronaviruses
		Current research on SARS coronavirus vaccine	Ye X., Meng X., Dong J.-B., Liang M., Hu F., Chen H.-Z.	Progress in Biochemistry and Biophysics	2003	Record is a review on coronavirus attenuation
33858231	10.1089/hum.2021.052	Current Update on Severe Acute Respiratory Syndrome Coronavirus 2 Vaccine Development with a Special Emphasis on Gene Therapy Viral Vector Design and Construction for Vaccination	Bisgin, A; Sanlioglu, AD; Eksi, YE; Griffith, TS; Sanlioglu, S	HUMAN GENE THERAPY	2021	Record is a review on coronavirus attenuation
34193869	10.1038/s41467-021-24339-7	CVnCoV and CV2CoV protect human ACE2 transgenic mice from ancestral B BavPat1 and emerging B.1.351 SARS-CoV-2	Hoffmann D, Corleis B, Rauch S, Roth N, Mühe J, Halwe NJ, Ulrich L, Fricke C, Schön J, Kraft A, Breithaupt A, Wernike K, Michelitsch A, Sick F, Wylezich C, Hoffmann B, Thran M, Thess A, Mueller SO, Mettenleiter TC, Petsch B, Dorhoi A, Beer M.	Nat Commun	2021	Record concerns coronaviruses but describes neither a novel nor an attenuated coronavirus
22582084	10.2217/fvl.12.23	CXCR2 signaling and host defense following coronavirus-induced encephalomyelitis	Marro BS, Hosking MP, Lane TE.	Future Virol	2012	Record concerns coronaviruses but describes neither a novel nor an attenuated coronavirus
34985303	10.1128/spectrum.01504-21	Cyclosporine A Inhibits Viral Infection and Release as Well as Cytokine Production in Lung Cells by Three SARS-CoV-2 Variants	Fenizia C, Galbiati S, Vanetti C, Vago R, Clerici M, Tacchetti C, Daniele T.	Microbiol Spectr	2022	Record concerns coronaviruses but describes neither a novel nor an attenuated coronavirus
16605302	10.1371/journal.pmed.0030149	Cynomolgus macaque as an animal model for severe acute respiratory syndrome	Lawler JV, Endy TP, Hensley LE, Garrison A, Fritz EA, Lesar M, Baric RS, Kulesh DA, Norwood DA, Wasieloski LP, Ulrich MP, Slezak TR, Vitalis E, Huggins JW, Jahrling PB, Paragas J.	PLoS Med	2006	Record concerns coronaviruses but describes neither a novel nor an attenuated coronavirus
27848249	10.1089/ars.2016.6773	Cystathionine γ-lyase deficiency exacerbates CCl4-induced acute hepatitis and fibrosis in the mouse liver	Ci L., Yang X., Gu X., Li Q., Guo Y., Zhou Z., Zhang M., Shi J., Yang H., Wang Z., Fei J.	Antioxidants and Redox Signaling	2017	Record does not concern coronaviruses
34064802	10.3390/v13050880	Cytokines and Leukocytes Subpopulations Profile in SARS-CoV-2 Patients Depending on the CT Score Severity	Rutkowska E, Kwiecień I, Żabicka M, Maliborski A, Raniszewska A, Kłos K, Urbańska W, Klajnowicz I, Rzepecki P, Chciałowski A.	Viruses	2021	Record concerns coronaviruses but describes neither a novel nor an attenuated coronavirus
33436498	10.1126/scisignal.abf1117	Cytoplasmic short linear motifs in ACE2 and integrin β(3) link SARS-CoV-2 host cell receptors to mediators of endocytosis and autophagy	Kliche J, Kuss H, Ali M, Ivarsson Y.	Sci Signal	2021	Record concerns coronaviruses but describes neither a novel nor an attenuated coronavirus
9356717		Cytotoxic activity of cells recovered from the respiratory tracts of chickens inoculated with infectious bronchitis virus	Thompson G, Naqi S.	Avian Dis	1997	Record concerns coronaviruses but describes neither a novel nor an attenuated coronavirus
10717287	10.1016/S0145-305X(99)00072-5	Cytotoxic T lymphocytes are critical in the control of infectious bronchitis virus in poultry	Collisson E.W., Pei J., Dzielawa J., Seo S.H.	Developmental and Comparative Immunology	2000	Record concerns coronaviruses but describes neither a novel nor an attenuated coronavirus
9311846	10.1128/JVI.71.10.7640-7647.1997	Cytotoxic T-cell-resistant variants arise at early times after infection in C57BL/6 but not in SCID mice infected with a neurotropic coronavirus	Pewe L, Xue S, Perlman S.	J Virol	1997	Record concerns coronaviruses but describes neither a novel nor an attenuated coronavirus
33828130	10.1038/s41598-021-86986-6	Cytotoxic T-lymphocyte elicited vaccine against SARS-CoV-2 employing immunoinformatics framework	Kumar N, Admane N, Kumari A, Sood D, Grover S, Prajapati VK, Chandra R, Grover A.	Sci Rep	2021	Record concerns coronaviruses but describes neither a novel nor an attenuated coronavirus
33591017	10.1097/CCM.0000000000004917	D -dimer and Death in Critically Ill Patients with Coronavirus Disease 2019	Short S.A.P., Gupta S., Brenner S.K., Hayek S.S., Srivastava A., Shaefi S., Singh H., Wu B., Bagchi A., Al-Samkari H., Dy R., Wilkinson K., Zakai N.A., Leaf D.E.	Critical Care Medicine	2021	Record concerns coronaviruses but describes neither a novel nor an attenuated coronavirus
16405010	10.1637/7389-052905R.1	Data from 11 years of molecular typing infectious bronchitis virus field isolates	Jackwood, MW; Hilt, DA; Lee, CW; Kwon, HM; Callison, SA; Moore, KM; Moscoso, H; Sellers, H; Thayer, S	AVIAN DISEASES	2005	Record concerns coronaviruses but describes neither a novel nor an attenuated coronavirus
33276297	10.1016/j.compbiomed.2020.104131	DBCOVP: A database of coronavirus virulent glycoproteins	Sahoo S, Mahapatra SR, Parida BK, Rath S, Dehury B, Raina V, Mohakud NK, Misra N, Suar M.	Comput Biol Med	2021	Record concerns coronaviruses but describes neither a novel nor an attenuated coronavirus
35056345	10.3390/medicina58010037	De Novo Minimal Change Disease following Vaccination with the Pfizer/BioNTech SARS-CoV-2 Vaccine in a Living Kidney Donor	Marinaki, S; Kolovou, K; Liapis, G; Skalioti, C; Tsiakas, S; Boletis, I	MEDICINA-LITHUANIA	2022	Record concerns coronaviruses but describes neither a novel nor an attenuated coronavirus
32861728	10.1016/j.envres.2020.110092	Decay of SARS-CoV-2 and surrogate murine hepatitis virus RNA in untreated wastewater to inform application in wastewater-based epidemiology	Ahmed W., Bertsch P.M., Bibby K., Haramoto E., Hewitt J., Huygens F., Gyawali P., Korajkic A., Riddell S., Sherchan S.P., Simpson S.L., Sirikanchana K., Symonds E.M., Verhagen R., Vasan S.S., Kitajima M., Bivins A.	Environmental Research	2020	Record concerns coronaviruses but describes neither a novel nor an attenuated coronavirus
27212685	10.1016/j.virusres.2016.05.003	Deciphering the biology of porcine epidemic diarrhea virus in the era of reverse genetics	Teeravechyan, S; Frantz, PN; Wongthida, P; Chailangkarn, T; Jaru-Ampornpan, P; Koonpaew, S; Jongkaewwattana, A	VIRUS RESEARCH	2016	Record is a review on coronavirus attenuation
33457109	10.1007/s40142-020-00197-5	Decoding Covid-19 with the SARS-CoV-2 Genome	Ellis, P; Somogyvari, F; Virok, DP; Noseda, M; McLean, GR	CURRENT GENETIC MEDICINE REPORTS	2021	Record is a review on coronavirus attenuation
32510973	10.1152/ajpcell.00224.2020	Decoding SARS-CoV-2 hijacking of host mitochondria in COVID-19 pathogenesis	Singh KK, Chaubey G, Chen JY, Suravajhala P.	Am J Physiol Cell Physiol	2020	Record concerns coronaviruses but describes neither a novel nor an attenuated coronavirus
32955847	10.1021/acsnano.0c06565	Decontamination of SARS-CoV-2 and other RNA viruses from N95 level meltblown polypropylene fabric using heat under different humidities	Weaver S.C., Chiu W., Cui Y., Campos R.K., Jin J., Rafael G.H., Zhao M., Liao L., Simmons G., Chu S.	ACS Nano	2020	Record concerns coronaviruses but describes neither a novel nor an attenuated coronavirus
31765674	10.1016/j.antiviral.2019.104661	Decoupling deISGylating and deubiquitinating activities of the MERS virus papain-like protease	Clasman J.R., Everett R.K., Srinivasan K., Mesecar A.D.	Antiviral Research	2020	Record is a review on coronavirus attenuation
32070687	10.1016/j.virusres.2020.197901	Decreased NHE3 activity and trafficking in TGEV-infected IPEC-J2 cells via the SGLT1-mediated P38 MAPK/AKt2 pathway	Yang Y., Yu Q., Song H., Ran L., Wang K., Xie L., Huang S., Niu Z., Zhang Y., Kan Z., Yan T., Song Z.	Virus Research	2020	Record concerns coronaviruses but describes neither a novel nor an attenuated coronavirus
33918368	10.3390/v13040610	Deep Transfer Learning Approach for Automatic Recognition of Drug Toxicity and Inhibition of SARS-CoV-2	Werner J, Kronberg RM, Stachura P, Ostermann PN, Müller L, Schaal H, Bhatia S, Kather JN, Borkhardt A, Pandyra AA, Lang KS, Lang PA.	Viruses	2021	Record concerns coronaviruses but describes neither a novel nor an attenuated coronavirus
6331129	10.1007/978-1-4615-9373-7_7	Defective replication of porcine transmissible gastroenteritis virus in a continuous cell line	Garwes DJ, Bountiff L, Millson GC, Elleman CJ.	Adv Exp Med Biol	1984	Record describes a novel non-attenuated coronavirus
	10.1182/blood-2020-141872	Defibrotide for the Treatment of Endotheliitis Complicating Sars-Cov-2 Infection: Rationale and Ongoing Studies As Part of the International Defacovid Study Group	Moraleda J.M., Carlo-Stella C., Garcia-Bernal D., Jara Rubio R., Andreu E., Calabretta E., Aghemo A., Diaz-Ricart M., Palomo M., Carreras E., Vlodavsky I., Iacobelli M., Fareed J., Castro P., Fernandez S., Mo C.C., Weinhouse G.L., Cooke K.R., Soiffer R.J., Baron R.M., O'Gorman P., Yanik G., Pagliuca A., Richardson P.G.	Blood (2020) 136 Supplement 1 (6-8). Date of Publication: 5 Nov 2020	2020	Record concerns coronaviruses but describes neither a novel nor an attenuated coronavirus
17121418	10.1002/path.2099	Deficiency of tenascin-C attenuates liver fibrosis in immune-mediated chronic hepatitis in mice	El-Karef A., Yoshida T., Gabazza E.C., Nishioka T., Inada H., Sakakura T., Imanaka-Yoshida K.	Journal of Pathology	2007	Record does not concern coronaviruses
	10.3389/fimmu.2021.741502	Defining the Innate Immune Responses for SARS-CoV-2-Human Macrophage Interactions	Abdelmoaty M.M., Yeapuri P., Machhi J., Olson K.E., Shahjin F., Kumar V., Zhou Y., Liang J., Pandey K., Acharya A., Byrareddy S.N., Mosley R.L., Gendelman H.E.	Frontiers in Immunology	2021	Record concerns coronaviruses but describes neither a novel nor an attenuated coronavirus
24077366	10.1099/vir.0.055533-0	Delayed induction of proinflammatory cytokines and suppression of innate antiviral response by the novel Middle East respiratory syndrome coronavirus: Implications for pathogenesis and treatment	Lau S.K.P., Lau C.C.Y., Chan K.-H., Li C.P.Y., Chen H., Jin D.-Y., Chan J.F.W., Woo P.C.Y., Yuen K.-Y.	Journal of General Virology	2013	Record concerns coronaviruses but describes neither a novel nor an attenuated coronavirus
8396672	10.1128/JVI.67.10.6110-6118.1993	Deletion mapping of a mouse hepatitis virus defective interfering RNA reveals the requirement of an internal and discontiguous sequence for replication	Lin YJ, Lai MM.	J Virol	1993	Record describes a coronavirus that cannot replicate
28490591	10.1128/JVI.00227-17	Deletion of a 197-amino-acid region in the N-terminal domain of spike protein attenuates porcine epidemic diarrhea virus in piglets	Hou Y., Lin C.-M., Yokoyama M., Yount B.L., Marthaler D., Douglas A.L., Ghimire S., Qin Y., Baric R.S., Saif L.J., Wang Q.	Journal of Virology	2017	Record describes coronavirus attenuation method that cannot be applied to SARS-CoV-2
	10.4172/1948-5964.S1.3	Deletion of a conserved LLRKxGxKG motif in Murine Hepatitis virus non-structural protein 1 attenuates the virus in mice	Guohui C., Lei L., Baojun L., Xiaoyan W., Jing L., Yi H., Yanjun L., Qingyu Z.	Journal of Antivirals and Antiretrovirals (2011) 2011. Date of Publication: 2011	2011	Record describes coronavirus attenuation method that cannot be applied to SARS-CoV-2
	10.1099/jgv.0.001130	Deletion of accessory genes 3a, 3b, 5a or 5b from avian coronavirus infectious bronchitis virus induces an attenuated phenotype both in vitro and in vivo	Laconi A., van Beurden S.J., Berends A.J., Krämer-Kühl A., Jansen C.A., Spekreijse D., Chénard G., Philipp H.-C., Mundt E., Rottier P.J.M., Hélène Verheije M.	Journal of General Virology	2018	Record describes coronavirus attenuation method that cannot be applied to SARS-CoV-2
30404797	10.1128/JVI.01758-18	Deletion of both the tyrosine-based endocytosis signal and the endoplasmic reticulum retrieval signal in the cytoplasmic tail of spike protein attenuates porcine epidemic diarrhea virus in pigs	Hou Y., Meulia T., Gao X., Saif L.J., Wang Q.	Journal of Virology	2019	Record describes coronavirus attenuation method that cannot be applied to SARS-CoV-2
31131400	10.1093/nar/gkz409	Delicate structural coordination of the Severe Acute Respiratory Syndrome coronavirus Nsp13 upon ATP hydrolysis	Jia Z., Yan L., Ren Z., Wu L., Wang J., Guo J., Zheng L., Ming Z., Zhang L., Lou Z., Rao Z.	Nucleic acids research	2019	Record concerns coronaviruses but describes neither a novel nor an attenuated coronavirus
31766215	10.3390/v11111054	Delmarva (dmv/1639) infectious bronchitis virus (ibv) variants isolated in eastern Canada show evidence of recombination	Hassan M., Ojkic D., Coffn C.S., Cork S.C., Meer F., Abdul-Careem M.F.	Viruses	2019	Record describes a novel non-attenuated coronavirus
31931366	10.1016/j.intimp.2019.106137	Demethyleneberberine attenuates concanavalin A-induced autoimmune hepatitis in mice through inhibition of NF-κB and MAPK signaling	Zhang M., Li Q., Zhou C., Zhao Y., Li R., Zhang Y.	International Immunopharmacology	2020	Record does not concern coronaviruses
20844609	10.1128/mBio.00171-10	Dendritic cell-specific antigen delivery by coronavirus vaccine vectors induces long-lasting protective antiviral and antitumor immunity	Cervantes-Barragan L., Züst R., Maier R., Sierro S., Janda J., Levy F., Speiser D., Romero P., Rohrlich P.-S., Ludewig B., Thiel V.	mBio	2010	PASS	PASS
24312302	10.1371/journal.pone.0081442	Dendritic cell-specific delivery of flt3l by coronavirus vectors secures induction of therapeutic antitumor immunity	Perez-Shibayama C., Gil-Cruz C., Nussbacher M., Allgäuer E., Cervantes-Barragan L., Züst R., Ludewig B.	PLoS ONE	2013	PASS	PASS
10418901	10.1016/S0264-410X(99)00059-6	Derivation of attenuated porcine epidemic diarrhea virus (PEDV) as vaccine candidate	Kweon C.-H., Kwon B.-J., Lee J.-G., Kwon G.-O., Kang Y.-B.	Vaccine	1999	PASS	The sequence of coronavirus described by the record is not known
32957746	10.37201/req/077.2020	Description of influenza B in seasonal epidemic in cantabria during the beginning of the pandemia due to SARS-CoV-2 [Descripción de la epidemia estacional por gripe B en cantabria durante los inicios de la pandemia por SARS-CoV-2]	Pablo-Marcos D., Rodríguez-Fernández A., Gozalo M., Agüero J., de Las Revillas F.A., Calvo J.	Revista Espanola de Quimioterapia	2020	Record concerns coronaviruses but describes neither a novel nor an attenuated coronavirus
33466810	10.3390/vaccines9010050	Design and Characterization of a DNA Vaccine Based on Spike with Consensus Nucleotide Sequence against Infectious Bronchitis Virus	Zuo L, Yan W, Song Z, Li H, Xie X, Gu K, Ma P, Tian Y, Zhou C, Zhao Y, Yang X, Wang H.	Vaccines (Basel)	2021	Record concerns coronaviruses but describes neither a novel nor an attenuated coronavirus
34119848	10.1016/j.jiph.2021.04.010	Design of a novel multiple epitope-based vaccine: An immunoinformatics approach to combat SARS-CoV-2 strains	Naveed M, Tehreem S, Arshad S, Bukhari SA, Shabbir MA, Essa R, Ali N, Zaib S, Khan A, Al-Harrasi A, Khan I.	J Infect Public Health	2021	Record concerns coronaviruses but describes neither a novel nor an attenuated coronavirus
33285567	10.1093/bib/bbaa340	Design of an epitope-based peptide vaccine against the SARS-CoV-2: a vaccine-informatics approach	Alam A, Khan A, Imam N, Siddiqui MF, Waseem M, Malik MZ, Ishrat R.	Brief Bioinform	2021	Record concerns coronaviruses but describes neither a novel nor an attenuated coronavirus
32419646	10.1080/07391102.2020.1770127	Design of multi-epitope vaccine candidate against SARS-CoV-2: a in-silico study	Abraham Peele K, Srihansa T, Krupanidhi S, Ayyagari VS, Venkateswarulu TC.	J Biomol Struct Dyn	2021	Record concerns coronaviruses but describes neither a novel nor an attenuated coronavirus
34914048	10.1007/978-1-0716-1884-4_9	Design of Replication-Competent VSV- and Ervebo-Vectored Vaccines Against SARS-CoV-2	Liu Q., Ding Z., Lan J., Wong G.	Methods in Molecular Biology	2022	Record concerns coronaviruses but describes neither a novel nor an attenuated coronavirus
32754160	10.3389/fimmu.2020.01663	Designing Multi-Epitope Vaccines to Combat Emerging Coronavirus Disease 2019 (COVID-19) by Employing Immuno-Informatics Approach	Naz A., Shahid F., Butt T.T., Awan F.M., Ali A., Malik A.	Frontiers in Immunology	2020	Record concerns coronaviruses but describes neither a novel nor an attenuated coronavirus
	10.1182/blood-2020-143160	Detailed Immunophenotypic Profiling of Peripheral Blood Immune Cells in Patients with Hematologic Malignancies after Sars-Cov-2 Infection	Lutfi F., Siglin J., Sanchez-Petitto G., Bukhari A., Gottlieb D., Kim D.W., Cooper B., Fleyshman M., De Miguel Perez D., Kleinberg M., Lapidus R.G., Rapoport A.P., Fan X., Dahiya S.	Blood (2020) 136 Supplement 1 (32). Date of Publication: 5 Nov 2020	2020	Record concerns coronaviruses but describes neither a novel nor an attenuated coronavirus
34097003	10.1093/bib/bbab213	Detecting SARS-CoV-2 and its variant strains with a full genome tiling array	Jiang L, Guo Y, Yu H, Hoff K, Ding X, Zhou W, Edwards J.	Brief Bioinform	2021	Record concerns coronaviruses but describes neither a novel nor an attenuated coronavirus
9533085		Detection and classification of infectious bronchitis viruses isolated in Korea by dot-immunoblotting assay using monoclonal antibodies	Song CS, Kim JH, Lee YJ, Kim SJ, Izumiya Y, Tohya Y, Jang HK, Mikami T.	Avian Dis	1998	Record describes a novel non-attenuated coronavirus
	10.1080/03079459608419177	Detection and differentiation of avian infectious bronchitis viruses using a monoclonal antibody-based ELISA	Ignjatovic J., Ashton F.	Avian Pathology	1996	Record concerns coronaviruses but describes neither a novel nor an attenuated coronavirus
12593737	10.1080/0307945021000024571	Detection and estimation of avian infectious bronchitis virus antigen by a novel indirect liquid-phase blocking enzyme-linked immunosorbent assay using chicken and rabbit affinity purified immunoglobulins	Lougovskaia N.N., Lougovskoi A.A., Bochkov Y.A., Batchenko G.V., Mudrak N.S., Drygin V.V., Borisov A.V., Borisov V.V., Gusev A.A.	Avian Pathology	2002	Record concerns coronaviruses but describes neither a novel nor an attenuated coronavirus
24928599	10.1177/1040638714538965	Detection and genetic characterization of Canine parvovirus and Canine coronavirus strains circulating in district of Tirana in Albania	Cavalli A, Desario C, Kusi I, Mari V, Lorusso E, Cirone F, Kumbe I, Colaianni ML, Buonavoglia D, Decaro N.	J Vet Diagn Invest	2014	Record concerns coronaviruses but describes neither a novel nor an attenuated coronavirus
17803510	10.1111/j.1863-2378.2007.01045.x	Detection and molecular characterization of calf diarrhoea bovine coronaviruses circulating in South Korea during 2004-2005	Park SJ, Lim GK, Park SI, Kim HH, Koh HB, Cho KO.	Zoonoses Public Health	2007	Record describes a novel non-attenuated coronavirus
	10.30466/vrf.2018.94774.2281	Detection and molecular characterization of infectious bronchitis virus from recent outbreaks in broiler flocks in Sulaimani governorate	Raoof H.S., Sheikh M.O.B., Sulaiman R.R.	Veterinary Research Forum	2021	Record describes a novel non-attenuated coronavirus
29017599	10.1186/s12985-017-0860-z	Detection and phylogenetic analyses of spike genes in porcine epidemic diarrhea virus strains circulating in China in 2016-2017	Zhang, QL; Liu, XS; Fang, YZ; Zhou, P; Wang, YL; Zhang, YG	VIROLOGY JOURNAL	2017	Record concerns coronaviruses but describes neither a novel nor an attenuated coronavirus
27887624	10.1186/s12985-016-0646-8	Detection and phylogenetic analysis of porcine epidemic diarrhea virus in central China based on the ORF3 gene and the S1 gene	Su Y., Liu Y., Chen Y., Zhao B., Ji P., Xing G., Jiang D., Liu C., Song Y., Wang G., Li D., Deng R., Zhang G.	Virology Journal	2016	Record describes a novel non-attenuated coronavirus
34960239	10.3390/vaccines9121493	Detection and Quantification of SARS-CoV-2 Receptor Binding Domain Neutralization by a Sensitive Competitive ELISA Assay	Shalash AO, Azuar A, Madge HYR, Modhiran N, Amarilla AA, Liang B, Khromykh AA, Watterson D, Young PR, Toth I, Skwarczynski M.	Vaccines (Basel)	2021	Record concerns coronaviruses but describes neither a novel nor an attenuated coronavirus
	10.1080/03079459994579	Detection and strain differentiation of infectious bronchitis virus in tracheal tissues from experimentally infected chickens by reverse transcription-polymerase chain reaction. Comparison with an immunohistochemical technique	Handberg K.J., Nielsen O.L., Pedersen M.W., Jørgensen P.H.	Avian Pathology	1999	Record describes a novel non-attenuated coronavirus
18645803	10.1080/03079459508419086	Detection by immunofluorescent assay of serotype-specific and group-specific antigens of infectious bronchitis virus in tracheas of broilers with respiratory problems	De Wit JJ, Koch G, Kant A, Van Roozelaar DJ.	Avian Pathol	1995	Record concerns coronaviruses but describes neither a novel nor an attenuated coronavirus
7107859	10.1128/jcm.16.1.34-40.1982	Detection by radioimmunoassay and enzyme-linked immunosorbent assay of coronavirus antibodies in bovine serum and lacteal secretions	Rodak L., Babiuk L.A., Acres S.D.	Journal of Clinical Microbiology	1982	The sequence of coronavirus described by the record is not known
32214974	10.1007/s00580-012-1621-4	Detection of 793/B serotype of infectious bronchitis virus in tissue sample by indirect immunoperoxidase assay	Shamsaddini-Bafti M, Vasfi-Marandi M, Momayez R, Toroghi R, Pourbakhsh SA, Salari R, Tabrizchi H.	Comp Clin Path	2014	Record concerns coronaviruses but describes neither a novel nor an attenuated coronavirus
[truncated: 3,167 more rows]
